# Supplementary material
Source: publisher figshare collection journal article supplement (https://acs.figshare.com/ndownloader/files/9959800)
Supplement: Supplementary file 1 [file 9959800]

####################################################################### 
# 
# combined cif
# 
#######################################################################
 
data_CoD
 
_audit_creation_method            'SHELXL-2014/7'
_shelx_SHELXL_version_number      '2014/7'
_chemical_name_systematic         ?
_chemical_name_common             ?
_chemical_melting_point           ?
_chemical_formula_moiety          ?
_chemical_formula_sum
 'C4.53 H3.64 Cl0.18 Co0.09 N0.53' 
_chemical_formula_weight          77.13

loop_
 _atom_type_symbol
 _atom_type_description
 _atom_type_scat_dispersion_real
 _atom_type_scat_dispersion_imag
 _atom_type_scat_source
 'C'  'C'   0.0040   0.0020
'Calculated using XDISP in WinGX (Farrugia, 1999)'
 'H'  'H'   0.0000   0.0000
'Calculated using XDISP in WinGX (Farrugia, 1999)'
 'N'  'N'   0.0076   0.0040
'Calculated using XDISP in WinGX (Farrugia, 1999)'
 'Cl'  'Cl'   0.1697   0.1896
'Calculated using XDISP in WinGX (Farrugia, 1999)'
 'Co'  'Co'   0.3480   1.1404
'Calculated using XDISP in WinGX (Farrugia, 1999)'
 
_space_group_crystal_system       monoclinic
_space_group_IT_number            14
_space_group_name_H-M_alt         'P 21/n'
_space_group_name_Hall            '-P 2yn'
 
_shelx_space_group_comment
;
The symmetry employed for this shelxl refinement is uniquely defined
by the following loop, which should always be used as a source of
symmetry information in preference to the above space-group names.
They are only intended as comments.
;
 
loop_
 _space_group_symop_operation_xyz
 'x, y, z'
 '-x+1/2, y+1/2, -z+1/2'
 '-x, -y, -z'
 'x-1/2, -y-1/2, z-1/2'
 
_cell_length_a                    18.1623(7)
_cell_length_b                    9.7531(4)
_cell_length_c                    24.6826(9)
_cell_angle_alpha                 90
_cell_angle_beta                  109.337(2)
_cell_angle_gamma                 90
_cell_volume                      4125.6(3)
_cell_formula_units_Z             45
_cell_measurement_temperature     100(2)
_cell_measurement_reflns_used     9954
_cell_measurement_theta_min       2.64
_cell_measurement_theta_max       37.04
 
_exptl_crystal_description        'plate'
_exptl_crystal_colour             'red'
_exptl_crystal_density_meas       ?
_exptl_crystal_density_method     ?
_exptl_crystal_density_diffrn     1.397          
_exptl_crystal_F_000              1800
_exptl_transmission_factor_min    ?
_exptl_transmission_factor_max    ?
_exptl_crystal_size_max           0.130
_exptl_crystal_size_mid           0.090
_exptl_crystal_size_min           0.005
_exptl_absorpt_coefficient_mu     0.741
_shelx_estimated_absorpt_T_min    0.910
_shelx_estimated_absorpt_T_max    0.996
_exptl_absorpt_correction_type    'multi-scan'
_exptl_absorpt_correction_T_min   0.867
_exptl_absorpt_correction_T_max   0.996
_exptl_absorpt_process_details    'SADABS-2014/5 - Bruker AXS, Madison WI'
_exptl_absorpt_special_details    ?
_diffrn_ambient_temperature       100(2)
_diffrn_radiation_wavelength      0.7749
_diffrn_radiation_type            'synchrotron'
_diffrn_source                    'Advanced Light Source, station 11.3.1'
_diffrn_measurement_device_type   'Bruker D8 with PHOTON 100 detector' 
_diffrn_measurement_method        '\f and \w shutterless scans'
_diffrn_detector_area_resol_mean  10.42
_diffrn_reflns_number             65324
_diffrn_reflns_av_unetI/netI      0.0525
_diffrn_reflns_av_R_equivalents   0.0555
_diffrn_reflns_limit_h_min        -28
_diffrn_reflns_limit_h_max        28
_diffrn_reflns_limit_k_min        -15
_diffrn_reflns_limit_k_max        15
_diffrn_reflns_limit_l_min        -38
_diffrn_reflns_limit_l_max        38
_diffrn_reflns_theta_min          2.468
_diffrn_reflns_theta_max          37.109
_diffrn_reflns_theta_full         27.706
_diffrn_measured_fraction_theta_max   0.997
_diffrn_measured_fraction_theta_full  0.999
_diffrn_reflns_Laue_measured_fraction_max    0.997
_diffrn_reflns_Laue_measured_fraction_full   0.999
_diffrn_reflns_point_group_measured_fraction_max   0.997
_diffrn_reflns_point_group_measured_fraction_full  0.999
_reflns_number_total              16257
_reflns_number_gt                 12060
_reflns_threshold_expression      'I > 2\s(I)'
_reflns_Friedel_coverage          0.000
_reflns_Friedel_fraction_max      .
_reflns_Friedel_fraction_full     .
 
_reflns_special_details
;
 Reflections were merged by SHELXL according to the crystal
 class for the calculation of statistics and refinement.
 
 _reflns_Friedel_fraction is defined as the number of unique
 Friedel pairs measured divided by the number that would be
 possible theoretically, ignoring centric projections and
 systematic absences.
;
 
_computing_data_collection        'Bruker APEX2 Bruker-AXS, Madison WI'
_computing_cell_refinement        'SAINT V8.34/7A Bruker-AXS, Madison WI'
_computing_data_reduction         'SAINT V8.34/7A Bruker-AXS, Madison WI'
_computing_structure_solution     'SHELXT 2014/4 Bruker-AXS, Madison WI'
_computing_structure_refinement 'SHELXL-2014/7 (Sheldrick, 2014)'
_computing_molecular_graphics     ?
_computing_publication_material   ?
_refine_special_details           
;
The guest solvent molecule was initially modelled as a CHCl3 molecule, however,
this generates a large electron density hole adjacent to one of the chlorine
atoms.
To determine whether the guest molecule was a partial occupancy chloroform or
a full occupancy dichloromethane with some disorder of the chlorine atoms, the
site occupation factor of the central carbon atom was allowed to refine. The
occupancy refined to approx. 1.2, so the molecule was modelled as a
dichloromethane molecule in which the chlorine atoms occupy any
two of three sites.
This assignment was confirmed by SQUEEZE, which showed the presence of 47 electrons
not accounted for by the Co-containing macrocycle. For details see below.
  _platon_squeeze_void_nr
  _platon_squeeze_void_average_x
  _platon_squeeze_void_average_y
  _platon_squeeze_void_average_z
  _platon_squeeze_void_volume
  _platon_squeeze_void_count_electrons
  _platon_squeeze_void_content
   1  0.028 -0.210  0.231       129        47 ' '
   2  0.972  0.210  0.769       128        47 ' '
   3  0.471  0.290  0.269       128        47 ' '
   4  0.528  0.710  0.731       129        47 ' '
SQUEEZE of the model in which the guest solvent molecule was omitted
showed the presence of 47 electrons per ASU, which confirms the presence of
dichloromethane (41 electrons) rather than chloroform (58 electrons).
The model has NOT been refined against the SQUEEZE output .hkl data
;
_refine_ls_structure_factor_coef  Fsqd
_refine_ls_matrix_type            full
_refine_ls_weighting_scheme       calc
_refine_ls_weighting_details
'w=1/[\s^2^(Fo^2^)+(0.0798P)^2^+5.7169P] where P=(Fo^2^+2Fc^2^)/3'
_atom_sites_solution_primary      'intrinsic phasing'
_atom_sites_solution_secondary    'difmap'
_atom_sites_solution_hydrogens    geom
_refine_ls_hydrogen_treatment     constr
_refine_ls_extinction_method      none
_refine_ls_extinction_coef        .
_refine_ls_number_reflns          16257
_refine_ls_number_parameters      551
_refine_ls_number_restraints      1
_refine_ls_R_factor_all           0.0900
_refine_ls_R_factor_gt            0.0635
_refine_ls_wR_factor_ref          0.1752
_refine_ls_wR_factor_gt           0.1593
_refine_ls_goodness_of_fit_ref    1.021
_refine_ls_restrained_S_all       1.021
_refine_ls_shift/su_max           0.001
_refine_ls_shift/su_mean          0.000
 
loop_
 _atom_site_label
 _atom_site_type_symbol
 _atom_site_fract_x
 _atom_site_fract_y
 _atom_site_fract_z
 _atom_site_U_iso_or_equiv
 _atom_site_adp_type
 _atom_site_occupancy
 _atom_site_site_symmetry_order  
 _atom_site_calc_flag
 _atom_site_refinement_flags_posn
 _atom_site_refinement_flags_adp
 _atom_site_refinement_flags_occupancy
 _atom_site_disorder_assembly
 _atom_site_disorder_group
C1 C 0.80431(13) 0.4066(2) 0.57290(9) 0.0213(4) Uani 1 1 d . . . . .
C2 C 0.84277(14) 0.2786(2) 0.58565(9) 0.0245(4) Uani 1 1 d . . . . .
H2 H 0.8638 0.2376 0.6225 0.029 Uiso 1 1 calc R U . . .
C3 C 0.84383(13) 0.2243(2) 0.53404(9) 0.0216(4) Uani 1 1 d . . . . .
H3 H 0.8668 0.1397 0.5292 0.026 Uiso 1 1 calc R U . . .
C4 C 0.80413(11) 0.31862(19) 0.48907(8) 0.0172(3) Uani 1 1 d . . . . .
C5 C 0.78816(11) 0.3151(2) 0.42915(8) 0.0171(3) Uani 1 1 d . . . . .
C6 C 0.75008(12) 0.4242(2) 0.39324(8) 0.0176(3) Uani 1 1 d . . . . .
C7 C 0.73095(15) 0.4311(2) 0.33195(9) 0.0271(5) Uani 1 1 d . . . . .
H7 H 0.7409 0.3618 0.3082 0.032 Uiso 1 1 calc R U . . .
C8 C 0.69610(15) 0.5541(2) 0.31379(9) 0.0267(5) Uani 1 1 d . . . . .
H8 H 0.6780 0.5866 0.2753 0.032 Uiso 1 1 calc R U . . .
C9 C 0.69186(12) 0.6257(2) 0.36340(8) 0.0176(3) Uani 1 1 d . . . . .
C10 C 0.65666(11) 0.75384(19) 0.36369(8) 0.0163(3) Uani 1 1 d . . . . .
C11 C 0.65195(11) 0.81779(19) 0.41351(8) 0.0157(3) Uani 1 1 d . . . . .
C12 C 0.61781(12) 0.9492(2) 0.41653(9) 0.0192(3) Uani 1 1 d . . . . .
H12 H 0.5936 1.0085 0.3851 0.023 Uiso 1 1 calc R U . . .
C13 C 0.62649(12) 0.9731(2) 0.47280(9) 0.0197(4) Uani 1 1 d . . . . .
H13 H 0.6105 1.0533 0.4877 0.024 Uiso 1 1 calc R U . . .
C14 C 0.66413(11) 0.8553(2) 0.50560(8) 0.0164(3) Uani 1 1 d . . . . .
C15 C 0.68379(11) 0.8386(2) 0.56526(9) 0.0178(3) Uani 1 1 d . . . . .
C16 C 0.72122(11) 0.7194(2) 0.59364(8) 0.0187(3) Uani 1 1 d . . . . .
C17 C 0.74599(13) 0.6798(2) 0.65269(9) 0.0237(4) Uani 1 1 d . . . . .
H17 H 0.7383 0.7308 0.6832 0.028 Uiso 1 1 calc R U . . .
C18 C 0.78312(14) 0.5541(2) 0.65767(9) 0.0251(4) Uani 1 1 d . . . . .
H18 H 0.8059 0.5033 0.6920 0.030 Uiso 1 1 calc R U . . .
C19 C 0.78049(13) 0.5157(2) 0.60162(9) 0.0207(4) Uani 1 1 d . . . . .
C20 C 0.81484(11) 0.19438(19) 0.40451(8) 0.0168(3) Uani 1 1 d . . . . .
C21 C 0.85854(12) 0.2075(2) 0.36757(9) 0.0202(4) Uani 1 1 d . . . . .
H21 H 0.8698 0.2963 0.3566 0.024 Uiso 1 1 calc R U . . .
C22 C 0.88558(12) 0.0933(2) 0.34675(9) 0.0209(4) Uani 1 1 d . . . . .
H22 H 0.9145 0.1052 0.3213 0.025 Uiso 1 1 calc R U . . .
C23 C 0.87132(13) -0.0383(2) 0.36225(9) 0.0228(4) Uani 1 1 d . . . . .
C24 C 0.82822(13) -0.0522(2) 0.39887(9) 0.0215(4) Uani 1 1 d . . . . .
H24 H 0.8177 -0.1414 0.4099 0.026 Uiso 1 1 calc R U . . .
C25 C 0.79994(11) 0.0616(2) 0.41983(9) 0.0181(3) Uani 1 1 d . . . . .
H25 H 0.7703 0.0491 0.4447 0.022 Uiso 1 1 calc R U . . .
C26 C 0.61699(12) 0.8199(2) 0.30682(8) 0.0177(3) Uani 1 1 d . . . . .
C27 C 0.64966(14) 0.9277(3) 0.28619(10) 0.0271(5) Uani 1 1 d . . . . .
H27 H 0.6982 0.9650 0.3093 0.033 Uiso 1 1 calc R U . . .
C28 C 0.61204(14) 0.9819(3) 0.23187(10) 0.0277(5) Uani 1 1 d . . . . .
H28 H 0.6359 1.0551 0.2184 0.033 Uiso 1 1 calc R U . . .
C29 C 0.54079(13) 0.9321(2) 0.19697(9) 0.0212(4) Uani 1 1 d . . . . .
C30 C 0.50696(15) 0.8257(3) 0.21821(11) 0.0321(5) Uani 1 1 d . . . . .
H30 H 0.4574 0.7909 0.1957 0.038 Uiso 1 1 calc R U . . .
C31 C 0.54509(15) 0.7701(3) 0.27209(10) 0.0298(5) Uani 1 1 d . . . . .
H31 H 0.5215 0.6964 0.2855 0.036 Uiso 1 1 calc R U . . .
C32 C 0.67086(12) 0.9534(2) 0.60071(9) 0.0194(4) Uani 1 1 d . . . . .
C33 C 0.59755(13) 1.0081(2) 0.59353(10) 0.0245(4) Uani 1 1 d . . . . .
H33 H 0.5529 0.9694 0.5657 0.029 Uiso 1 1 calc R U . . .
C34 C 0.58836(14) 1.1185(2) 0.62649(10) 0.0264(4) Uani 1 1 d . . . . .
H34 H 0.5375 1.1536 0.6207 0.032 Uiso 1 1 calc R U . . .
C35 C 0.65184(15) 1.1785(2) 0.66750(10) 0.0264(4) Uani 1 1 d . . . . .
C36 C 0.72573(16) 1.1227(3) 0.67567(12) 0.0336(5) Uani 1 1 d . . . . .
H36 H 0.7701 1.1609 0.7039 0.040 Uiso 1 1 calc R U . . .
C37 C 0.73505(14) 1.0122(3) 0.64308(11) 0.0305(5) Uani 1 1 d . . . . .
H37 H 0.7857 0.9756 0.6496 0.037 Uiso 1 1 calc R U . . .
C38 C 0.90029(19) -0.1628(3) 0.33923(12) 0.0374(6) Uani 1 1 d . . . . .
H38A H 0.9569 -0.1706 0.3575 0.056 Uiso 1 1 calc R U . . .
H38B H 0.8878 -0.1537 0.2976 0.056 Uiso 1 1 calc R U . . .
H38C H 0.8750 -0.2450 0.3476 0.056 Uiso 1 1 calc R U . . .
C39 C 0.50232(16) 0.9873(3) 0.13711(10) 0.0311(5) Uani 1 1 d . . . . .
H39A H 0.4867 1.0828 0.1393 0.047 Uiso 1 1 calc R U . . .
H39B H 0.4561 0.9321 0.1174 0.047 Uiso 1 1 calc R U . . .
H39C H 0.5391 0.9828 0.1158 0.047 Uiso 1 1 calc R U . . .
C40 C 0.64201(18) 1.2995(3) 0.70250(11) 0.0359(6) Uani 1 1 d . . . . .
H40A H 0.5949 1.3504 0.6810 0.054 Uiso 1 1 calc R U . . .
H40B H 0.6876 1.3598 0.7105 0.054 Uiso 1 1 calc R U . . .
H40C H 0.6372 1.2671 0.7388 0.054 Uiso 1 1 calc R U . . .
C101 C 0.88695(11) 0.6260(2) 0.47919(8) 0.0174(3) Uani 1 1 d . . . . .
H101 H 0.8741 0.5444 0.4571 0.021 Uiso 1 1 calc R U . . .
C102 C 0.95926(11) 0.6856(2) 0.48788(9) 0.0195(4) Uani 1 1 d . . . . .
H102 H 0.9947 0.6461 0.4714 0.023 Uiso 1 1 calc R U . . .
C103 C 0.97928(12) 0.8035(2) 0.52082(9) 0.0200(4) Uani 1 1 d . . . . .
H103 H 1.0282 0.8469 0.5269 0.024 Uiso 1 1 calc R U . . .
C104 C 0.92601(12) 0.8564(2) 0.54464(9) 0.0196(4) Uani 1 1 d . . . . .
H104 H 0.9386 0.9355 0.5684 0.024 Uiso 1 1 calc R U . . .
C105 C 0.85437(11) 0.7928(2) 0.53349(9) 0.0179(3) Uani 1 1 d . . . . .
H105 H 0.8180 0.8308 0.5495 0.021 Uiso 1 1 calc R U . . .
C201 C 0.56926(13) 0.5193(2) 0.42457(10) 0.0254(4) Uani 1 1 d . . . . .
H201 H 0.5752 0.5869 0.3986 0.030 Uiso 1 1 calc R U . . .
C202 C 0.49916(14) 0.4488(3) 0.41085(12) 0.0313(5) Uani 1 1 d . . . . .
H202 H 0.4585 0.4672 0.3758 0.038 Uiso 1 1 calc R U . . .
C203 C 0.48892(14) 0.3523(3) 0.44830(13) 0.0314(5) Uani 1 1 d . . . . .
H203 H 0.4411 0.3038 0.4399 0.038 Uiso 1 1 calc R U . . .
C204 C 0.55005(14) 0.3276(2) 0.49853(12) 0.0286(5) Uani 1 1 d . . . . .
H204 H 0.5447 0.2618 0.5253 0.034 Uiso 1 1 calc R U . . .
C205 C 0.61915(14) 0.4000(2) 0.50930(10) 0.0245(4) Uani 1 1 d . . . . .
H205 H 0.6611 0.3815 0.5436 0.029 Uiso 1 1 calc R U . . .
N1 N 0.78211(10) 0.42675(17) 0.51486(7) 0.0175(3) Uani 1 1 d . . . . .
N2 N 0.72538(9) 0.54532(17) 0.41078(7) 0.0156(3) Uani 1 1 d . . . . .
N3 N 0.67934(9) 0.76298(17) 0.46774(7) 0.0155(3) Uani 1 1 d . . . . .
N4 N 0.74192(10) 0.61625(17) 0.56422(7) 0.0173(3) Uani 1 1 d . . . . .
N100 N 0.83399(9) 0.67938(16) 0.50089(7) 0.0155(3) Uani 1 1 d . . . . .
N200 N 0.62889(10) 0.49602(18) 0.47279(8) 0.0188(3) Uani 1 1 d . . . . .
Co1 Co 0.73040(2) 0.59070(3) 0.48680(2) 0.01423(7) Uani 1 1 d . . . . .
Cl1 Cl 0.44964(6) 1.41079(9) 0.23786(4) 0.0412(2) Uani 0.781(2) 1 d . . P . .
Cl2 Cl 0.43654(9) 1.15696(13) 0.29586(5) 0.0647(4) Uani 0.788(2) 1 d . . P . .
Cl3 Cl 0.57772(9) 1.27012(17) 0.31500(7) 0.0372(4) Uiso 0.432(2) 1 d . . P . .
C1D C 0.4948(3) 1.2538(4) 0.2690(2) 0.0721(14) Uani 1 1 d . . . . .
H1D H 0.5023 1.1994 0.2369 0.086 Uiso 1 1 calc R U . . .
 
loop_
 _atom_site_aniso_label
 _atom_site_aniso_U_11
 _atom_site_aniso_U_22
 _atom_site_aniso_U_33
 _atom_site_aniso_U_23
 _atom_site_aniso_U_13
 _atom_site_aniso_U_12
C1 0.0251(9) 0.0215(9) 0.0155(8) 0.0036(7) 0.0044(7) 0.0006(7)
C2 0.0294(10) 0.0217(9) 0.0195(9) 0.0066(7) 0.0043(8) 0.0023(8)
C3 0.0239(9) 0.0173(8) 0.0204(9) 0.0041(7) 0.0029(7) 0.0028(7)
C4 0.0175(8) 0.0152(8) 0.0183(8) 0.0020(6) 0.0050(7) 0.0004(6)
C5 0.0160(8) 0.0155(8) 0.0174(8) 0.0004(6) 0.0023(6) 0.0000(6)
C6 0.0208(8) 0.0155(8) 0.0148(8) -0.0003(6) 0.0035(7) 0.0022(6)
C7 0.0381(12) 0.0245(10) 0.0151(8) -0.0004(7) 0.0042(8) 0.0122(9)
C8 0.0394(12) 0.0245(10) 0.0137(8) 0.0029(7) 0.0054(8) 0.0140(9)
C9 0.0218(8) 0.0170(8) 0.0133(7) 0.0022(6) 0.0050(7) 0.0032(7)
C10 0.0189(8) 0.0150(7) 0.0141(7) 0.0024(6) 0.0043(6) 0.0010(6)
C11 0.0159(7) 0.0155(7) 0.0153(8) 0.0022(6) 0.0043(6) 0.0014(6)
C12 0.0206(8) 0.0172(8) 0.0188(8) 0.0018(7) 0.0053(7) 0.0030(7)
C13 0.0201(8) 0.0187(8) 0.0207(9) -0.0001(7) 0.0075(7) 0.0032(7)
C14 0.0128(7) 0.0185(8) 0.0178(8) -0.0011(6) 0.0049(6) 0.0005(6)
C15 0.0157(8) 0.0210(8) 0.0174(8) -0.0024(7) 0.0065(7) -0.0009(7)
C16 0.0173(8) 0.0224(9) 0.0167(8) -0.0016(7) 0.0057(7) 0.0002(7)
C17 0.0266(10) 0.0288(10) 0.0150(8) -0.0016(7) 0.0061(7) 0.0007(8)
C18 0.0304(11) 0.0281(10) 0.0152(8) 0.0031(7) 0.0053(8) 0.0020(8)
C19 0.0245(9) 0.0212(9) 0.0156(8) 0.0028(7) 0.0054(7) 0.0000(7)
C20 0.0154(7) 0.0148(7) 0.0175(8) 0.0008(6) 0.0020(6) 0.0007(6)
C21 0.0212(9) 0.0205(9) 0.0175(8) 0.0023(7) 0.0046(7) 0.0007(7)
C22 0.0207(8) 0.0271(10) 0.0145(8) 0.0004(7) 0.0053(7) 0.0033(7)
C23 0.0262(10) 0.0213(9) 0.0169(8) -0.0022(7) 0.0020(7) 0.0073(8)
C24 0.0246(9) 0.0151(8) 0.0215(9) 0.0006(7) 0.0032(8) 0.0009(7)
C25 0.0174(8) 0.0159(8) 0.0205(9) 0.0000(6) 0.0058(7) -0.0015(6)
C26 0.0229(9) 0.0154(8) 0.0147(8) 0.0027(6) 0.0060(7) 0.0037(7)
C27 0.0249(10) 0.0302(11) 0.0223(10) 0.0093(8) 0.0024(8) -0.0044(8)
C28 0.0289(11) 0.0278(10) 0.0238(10) 0.0118(8) 0.0054(8) -0.0002(9)
C29 0.0278(10) 0.0176(8) 0.0157(8) 0.0020(7) 0.0038(7) 0.0066(7)
C30 0.0330(12) 0.0299(11) 0.0235(10) 0.0065(9) -0.0039(9) -0.0059(9)
C31 0.0308(11) 0.0278(11) 0.0241(10) 0.0087(9) 0.0003(9) -0.0061(9)
C32 0.0190(8) 0.0220(9) 0.0178(8) -0.0020(7) 0.0069(7) 0.0009(7)
C33 0.0216(9) 0.0265(10) 0.0258(10) 0.0007(8) 0.0082(8) 0.0019(8)
C34 0.0284(10) 0.0275(10) 0.0254(10) 0.0032(8) 0.0116(9) 0.0071(8)
C35 0.0327(11) 0.0258(10) 0.0206(9) -0.0004(8) 0.0087(8) 0.0063(9)
C36 0.0323(12) 0.0351(12) 0.0314(12) -0.0102(10) 0.0077(10) 0.0013(10)
C37 0.0229(10) 0.0362(12) 0.0302(11) -0.0100(10) 0.0060(9) 0.0016(9)
C38 0.0540(17) 0.0309(12) 0.0291(12) -0.0042(10) 0.0162(12) 0.0163(12)
C39 0.0392(13) 0.0273(11) 0.0198(10) 0.0066(8) 0.0002(9) 0.0069(10)
C40 0.0482(15) 0.0316(12) 0.0273(11) -0.0048(10) 0.0116(11) 0.0123(11)
C101 0.0174(8) 0.0183(8) 0.0161(8) 0.0002(6) 0.0051(6) 0.0022(6)
C102 0.0163(8) 0.0224(9) 0.0200(9) 0.0020(7) 0.0062(7) 0.0039(7)
C103 0.0154(8) 0.0218(9) 0.0209(9) 0.0031(7) 0.0034(7) 0.0008(7)
C104 0.0176(8) 0.0172(8) 0.0213(9) -0.0006(7) 0.0029(7) 0.0004(7)
C105 0.0157(8) 0.0177(8) 0.0188(8) -0.0004(7) 0.0036(7) 0.0022(6)
C201 0.0219(9) 0.0263(10) 0.0261(10) 0.0057(8) 0.0056(8) -0.0013(8)
C202 0.0233(10) 0.0342(12) 0.0323(12) 0.0039(10) 0.0039(9) -0.0026(9)
C203 0.0238(10) 0.0250(11) 0.0469(15) -0.0006(10) 0.0136(10) -0.0043(8)
C204 0.0301(11) 0.0221(10) 0.0378(13) 0.0053(9) 0.0166(10) -0.0006(8)
C205 0.0264(10) 0.0222(9) 0.0260(10) 0.0057(8) 0.0100(8) 0.0016(8)
N1 0.0215(8) 0.0155(7) 0.0148(7) 0.0029(5) 0.0049(6) 0.0012(6)
N2 0.0171(7) 0.0146(6) 0.0135(7) 0.0011(5) 0.0031(5) 0.0019(5)
N3 0.0159(7) 0.0163(7) 0.0138(7) 0.0007(5) 0.0041(5) 0.0011(5)
N4 0.0192(7) 0.0178(7) 0.0147(7) 0.0005(6) 0.0052(6) 0.0010(6)
N100 0.0152(7) 0.0150(7) 0.0155(7) 0.0015(5) 0.0038(6) 0.0015(5)
N200 0.0197(7) 0.0177(7) 0.0208(8) -0.0004(6) 0.0089(6) -0.0012(6)
Co1 0.01522(11) 0.01444(11) 0.01250(11) 0.00134(9) 0.00389(8) 0.00027(9)
Cl1 0.0489(5) 0.0298(4) 0.0426(5) 0.0010(3) 0.0118(4) 0.0068(3)
Cl2 0.1039(11) 0.0467(6) 0.0531(7) 0.0032(5) 0.0391(7) -0.0163(6)
C1D 0.108(4) 0.057(2) 0.079(3) 0.026(2) 0.068(3) 0.037(2)
 
_geom_special_details
;
 All esds (except the esd in the dihedral angle between two l.s. planes)
 are estimated using the full covariance matrix.  The cell esds are taken
 into account individually in the estimation of esds in distances, angles
 and torsion angles; correlations between esds in cell parameters are only
 used when they are defined by crystal symmetry.  An approximate (isotropic)
 treatment of cell esds is used for estimating esds involving l.s. planes.
;
 
loop_
 _geom_bond_atom_site_label_1
 _geom_bond_atom_site_label_2
 _geom_bond_distance
 _geom_bond_site_symmetry_2
 _geom_bond_publ_flag
C1 N1 1.368(3) . ?
C1 C2 1.414(3) . ?
C1 C19 1.423(3) . ?
C2 C3 1.385(3) . ?
C2 H2 0.9500 . ?
C3 C4 1.438(3) . ?
C3 H3 0.9500 . ?
C4 N1 1.359(3) . ?
C4 C5 1.410(3) . ?
C5 C6 1.411(3) . ?
C5 C20 1.478(3) . ?
C6 N2 1.383(2) . ?
C6 C7 1.437(3) . ?
C7 C8 1.361(3) . ?
C7 H7 0.9500 . ?
C8 C9 1.434(3) . ?
C8 H8 0.9500 . ?
C9 N2 1.372(2) . ?
C9 C10 1.405(3) . ?
C10 C11 1.407(3) . ?
C10 C26 1.495(3) . ?
C11 N3 1.373(2) . ?
C11 C12 1.436(3) . ?
C12 C13 1.365(3) . ?
C12 H12 0.9500 . ?
C13 C14 1.441(3) . ?
C13 H13 0.9500 . ?
C14 N3 1.390(2) . ?
C14 C15 1.405(3) . ?
C15 C16 1.411(3) . ?
C15 C32 1.487(3) . ?
C16 N4 1.364(3) . ?
C16 C17 1.429(3) . ?
C17 C18 1.385(3) . ?
C17 H17 0.9500 . ?
C18 C19 1.419(3) . ?
C18 H18 0.9500 . ?
C19 N4 1.370(3) . ?
C20 C21 1.399(3) . ?
C20 C25 1.400(3) . ?
C21 C22 1.383(3) . ?
C21 H21 0.9500 . ?
C22 C23 1.388(3) . ?
C22 H22 0.9500 . ?
C23 C24 1.384(3) . ?
C23 C38 1.508(3) . ?
C24 C25 1.393(3) . ?
C24 H24 0.9500 . ?
C25 H25 0.9500 . ?
C26 C27 1.385(3) . ?
C26 C31 1.391(3) . ?
C27 C28 1.392(3) . ?
C27 H27 0.9500 . ?
C28 C29 1.384(3) . ?
C28 H28 0.9500 . ?
C29 C30 1.394(3) . ?
C29 C39 1.509(3) . ?
C30 C31 1.390(3) . ?
C30 H30 0.9500 . ?
C31 H31 0.9500 . ?
C32 C33 1.390(3) . ?
C32 C37 1.405(3) . ?
C33 C34 1.393(3) . ?
C33 H33 0.9500 . ?
C34 C35 1.387(4) . ?
C34 H34 0.9500 . ?
C35 C36 1.400(4) . ?
C35 C40 1.508(3) . ?
C36 C37 1.388(3) . ?
C36 H36 0.9500 . ?
C37 H37 0.9500 . ?
C38 H38A 0.9800 . ?
C38 H38B 0.9800 . ?
C38 H38C 0.9800 . ?
C39 H39A 0.9800 . ?
C39 H39B 0.9800 . ?
C39 H39C 0.9800 . ?
C40 H40A 0.9800 . ?
C40 H40B 0.9800 . ?
C40 H40C 0.9800 . ?
C101 N100 1.350(2) . ?
C101 C102 1.386(3) . ?
C101 H101 0.9500 . ?
C102 C103 1.385(3) . ?
C102 H102 0.9500 . ?
C103 C104 1.387(3) . ?
C103 H103 0.9500 . ?
C104 C105 1.384(3) . ?
C104 H104 0.9500 . ?
C105 N100 1.345(3) . ?
C105 H105 0.9500 . ?
C201 N200 1.337(3) . ?
C201 C202 1.386(3) . ?
C201 H201 0.9500 . ?
C202 C203 1.374(4) . ?
C202 H202 0.9500 . ?
C203 C204 1.384(4) . ?
C203 H203 0.9500 . ?
C204 C205 1.387(3) . ?
C204 H204 0.9500 . ?
C205 N200 1.351(3) . ?
C205 H205 0.9500 . ?
N1 Co1 1.8675(17) . ?
N2 Co1 1.9005(17) . ?
N3 Co1 1.9015(16) . ?
N4 Co1 1.8689(17) . ?
N100 Co1 1.9940(16) . ?
N200 Co1 1.9871(17) . ?
Cl1 C1D 1.786(4) . ?
Cl2 C1D 1.709(5) . ?
Cl3 C1D 1.565(6) . ?
C1D H1D 1.0000 . ?
 
loop_
 _geom_angle_atom_site_label_1
 _geom_angle_atom_site_label_2
 _geom_angle_atom_site_label_3
 _geom_angle
 _geom_angle_site_symmetry_1
 _geom_angle_site_symmetry_3
 _geom_angle_publ_flag
N1 C1 C2 108.22(19) . . ?
N1 C1 C19 112.40(18) . . ?
C2 C1 C19 139.3(2) . . ?
C3 C2 C1 106.78(18) . . ?
C3 C2 H2 126.6 . . ?
C1 C2 H2 126.6 . . ?
C2 C3 C4 108.03(18) . . ?
C2 C3 H3 126.0 . . ?
C4 C3 H3 126.0 . . ?
N1 C4 C5 121.35(17) . . ?
N1 C4 C3 106.56(17) . . ?
C5 C4 C3 132.09(19) . . ?
C4 C5 C6 121.88(18) . . ?
C4 C5 C20 118.00(17) . . ?
C6 C5 C20 120.09(18) . . ?
N2 C6 C5 126.15(18) . . ?
N2 C6 C7 107.40(17) . . ?
C5 C6 C7 126.44(18) . . ?
C8 C7 C6 108.18(19) . . ?
C8 C7 H7 125.9 . . ?
C6 C7 H7 125.9 . . ?
C7 C8 C9 107.36(18) . . ?
C7 C8 H8 126.3 . . ?
C9 C8 H8 126.3 . . ?
N2 C9 C10 125.34(18) . . ?
N2 C9 C8 108.41(17) . . ?
C10 C9 C8 126.21(18) . . ?
C9 C10 C11 123.95(17) . . ?
C9 C10 C26 117.20(17) . . ?
C11 C10 C26 118.69(17) . . ?
N3 C11 C10 124.93(17) . . ?
N3 C11 C12 108.68(17) . . ?
C10 C11 C12 126.39(17) . . ?
C13 C12 C11 107.40(17) . . ?
C13 C12 H12 126.3 . . ?
C11 C12 H12 126.3 . . ?
C12 C13 C14 108.00(18) . . ?
C12 C13 H13 126.0 . . ?
C14 C13 H13 126.0 . . ?
N3 C14 C15 126.24(18) . . ?
N3 C14 C13 107.56(17) . . ?
C15 C14 C13 126.18(18) . . ?
C14 C15 C16 121.99(18) . . ?
C14 C15 C32 119.61(18) . . ?
C16 C15 C32 118.22(18) . . ?
N4 C16 C15 121.06(18) . . ?
N4 C16 C17 107.15(18) . . ?
C15 C16 C17 131.78(19) . . ?
C18 C17 C16 108.00(19) . . ?
C18 C17 H17 126.0 . . ?
C16 C17 H17 126.0 . . ?
C17 C18 C19 106.78(19) . . ?
C17 C18 H18 126.6 . . ?
C19 C18 H18 126.6 . . ?
N4 C19 C18 108.24(19) . . ?
N4 C19 C1 111.82(18) . . ?
C18 C19 C1 139.9(2) . . ?
C21 C20 C25 117.55(18) . . ?
C21 C20 C5 121.97(18) . . ?
C25 C20 C5 120.41(18) . . ?
C22 C21 C20 121.11(19) . . ?
C22 C21 H21 119.4 . . ?
C20 C21 H21 119.4 . . ?
C21 C22 C23 121.4(2) . . ?
C21 C22 H22 119.3 . . ?
C23 C22 H22 119.3 . . ?
C24 C23 C22 117.94(19) . . ?
C24 C23 C38 120.7(2) . . ?
C22 C23 C38 121.4(2) . . ?
C23 C24 C25 121.45(19) . . ?
C23 C24 H24 119.3 . . ?
C25 C24 H24 119.3 . . ?
C24 C25 C20 120.58(19) . . ?
C24 C25 H25 119.7 . . ?
C20 C25 H25 119.7 . . ?
C27 C26 C31 117.89(19) . . ?
C27 C26 C10 122.72(19) . . ?
C31 C26 C10 119.38(18) . . ?
C26 C27 C28 120.6(2) . . ?
C26 C27 H27 119.7 . . ?
C28 C27 H27 119.7 . . ?
C29 C28 C27 121.7(2) . . ?
C29 C28 H28 119.1 . . ?
C27 C28 H28 119.1 . . ?
C28 C29 C30 117.74(19) . . ?
C28 C29 C39 121.2(2) . . ?
C30 C29 C39 121.0(2) . . ?
C31 C30 C29 120.5(2) . . ?
C31 C30 H30 119.7 . . ?
C29 C30 H30 119.7 . . ?
C30 C31 C26 121.5(2) . . ?
C30 C31 H31 119.3 . . ?
C26 C31 H31 119.3 . . ?
C33 C32 C37 117.5(2) . . ?
C33 C32 C15 123.02(19) . . ?
C37 C32 C15 119.43(19) . . ?
C32 C33 C34 121.1(2) . . ?
C32 C33 H33 119.4 . . ?
C34 C33 H33 119.4 . . ?
C35 C34 C33 121.4(2) . . ?
C35 C34 H34 119.3 . . ?
C33 C34 H34 119.3 . . ?
C34 C35 C36 117.8(2) . . ?
C34 C35 C40 121.4(2) . . ?
C36 C35 C40 120.8(2) . . ?
C37 C36 C35 120.9(2) . . ?
C37 C36 H36 119.5 . . ?
C35 C36 H36 119.5 . . ?
C36 C37 C32 121.2(2) . . ?
C36 C37 H37 119.4 . . ?
C32 C37 H37 119.4 . . ?
C23 C38 H38A 109.5 . . ?
C23 C38 H38B 109.5 . . ?
H38A C38 H38B 109.5 . . ?
C23 C38 H38C 109.5 . . ?
H38A C38 H38C 109.5 . . ?
H38B C38 H38C 109.5 . . ?
C29 C39 H39A 109.5 . . ?
C29 C39 H39B 109.5 . . ?
H39A C39 H39B 109.5 . . ?
C29 C39 H39C 109.5 . . ?
H39A C39 H39C 109.5 . . ?
H39B C39 H39C 109.5 . . ?
C35 C40 H40A 109.5 . . ?
C35 C40 H40B 109.5 . . ?
H40A C40 H40B 109.5 . . ?
C35 C40 H40C 109.5 . . ?
H40A C40 H40C 109.5 . . ?
H40B C40 H40C 109.5 . . ?
N100 C101 C102 122.67(18) . . ?
N100 C101 H101 118.7 . . ?
C102 C101 H101 118.7 . . ?
C103 C102 C101 119.32(19) . . ?
C103 C102 H102 120.3 . . ?
C101 C102 H102 120.3 . . ?
C102 C103 C104 118.24(19) . . ?
C102 C103 H103 120.9 . . ?
C104 C103 H103 120.9 . . ?
C105 C104 C103 119.37(19) . . ?
C105 C104 H104 120.3 . . ?
C103 C104 H104 120.3 . . ?
N100 C105 C104 122.78(18) . . ?
N100 C105 H105 118.6 . . ?
C104 C105 H105 118.6 . . ?
N200 C201 C202 122.8(2) . . ?
N200 C201 H201 118.6 . . ?
C202 C201 H201 118.6 . . ?
C203 C202 C201 119.5(2) . . ?
C203 C202 H202 120.2 . . ?
C201 C202 H202 120.2 . . ?
C202 C203 C204 118.3(2) . . ?
C202 C203 H203 120.8 . . ?
C204 C203 H203 120.8 . . ?
C203 C204 C205 119.3(2) . . ?
C203 C204 H204 120.3 . . ?
C205 C204 H204 120.3 . . ?
N200 C205 C204 122.3(2) . . ?
N200 C205 H205 118.8 . . ?
C204 C205 H205 118.8 . . ?
C4 N1 C1 110.40(17) . . ?
C4 N1 Co1 132.90(14) . . ?
C1 N1 Co1 116.70(14) . . ?
C9 N2 C6 108.64(16) . . ?
C9 N2 Co1 124.84(13) . . ?
C6 N2 Co1 126.41(13) . . ?
C11 N3 C14 108.34(16) . . ?
C11 N3 Co1 125.10(13) . . ?
C14 N3 Co1 126.55(13) . . ?
C16 N4 C19 109.79(17) . . ?
C16 N4 Co1 133.26(14) . . ?
C19 N4 Co1 116.92(14) . . ?
C105 N100 C101 117.57(17) . . ?
C105 N100 Co1 121.17(13) . . ?
C101 N100 Co1 121.24(13) . . ?
C201 N200 C205 117.71(19) . . ?
C201 N200 Co1 120.50(15) . . ?
C205 N200 Co1 121.65(15) . . ?
N1 Co1 N4 82.11(7) . . ?
N1 Co1 N2 91.18(7) . . ?
N4 Co1 N2 173.28(7) . . ?
N1 Co1 N3 172.98(7) . . ?
N4 Co1 N3 90.88(7) . . ?
N2 Co1 N3 95.82(7) . . ?
N1 Co1 N200 89.45(7) . . ?
N4 Co1 N200 91.34(7) . . ?
N2 Co1 N200 88.94(7) . . ?
N3 Co1 N200 91.10(7) . . ?
N1 Co1 N100 88.69(7) . . ?
N4 Co1 N100 89.09(7) . . ?
N2 Co1 N100 90.41(7) . . ?
N3 Co1 N100 90.83(7) . . ?
N200 Co1 N100 178.01(7) . . ?
Cl3 C1D Cl2 110.2(3) . . ?
Cl3 C1D Cl1 114.8(3) . . ?
Cl2 C1D Cl1 112.7(2) . . ?
Cl3 C1D H1D 106.2 . . ?
Cl2 C1D H1D 106.2 . . ?
Cl1 C1D H1D 106.2 . . ?
 
_refine_diff_density_max    1.057
_refine_diff_density_min   -0.671
_refine_diff_density_rms    0.102

_shelx_res_file
;

    shelx.res created by SHELXL-2014/7


TITL CoD_2_a.res in P2(1)/n
CELL  0.77490  18.1623   9.7531  24.6826   90.000  109.337   90.000
ZERR    45.00   0.0007   0.0004   0.0009    0.000    0.002    0.000
LATT   1
SYMM  1/2 - X, 1/2 + Y, 1/2 - Z
SFAC  C    H    N    CL   CO
DISP    H     0.00000    0.00000         0.67
DISP    C     0.00399    0.00197        13.60
DISP    N     0.00762    0.00403        23.92
DISP    Cl    0.16974    0.18956       859.19
DISP    Co    0.34795    1.14041      5063.52
UNIT  204 164 24 8 4
MERG   2
SUMP 2.00 0.0 1.0 2 1.0 3 1.0 4
FMAP   2
PLAN   20
ACTA
SIZE 0.090 0.130 0.005
BOND   $H
LIST   4
L.S.  10
TEMP  -173.00
WGHT    0.079800    5.716900
FVAR       0.24397   0.78070   0.78762   0.43169
C1    1    0.804311    0.406569    0.572901    11.00000    0.02514    0.02153 =
         0.01549    0.00362    0.00443    0.00058
C2    1    0.842769    0.278555    0.585649    11.00000    0.02938    0.02171 =
         0.01951    0.00657    0.00432    0.00228
AFIX  43
H2    2    0.863820    0.237642    0.622502    11.00000   -1.20000
AFIX   0
C3    1    0.843826    0.224316    0.534035    11.00000    0.02388    0.01728 =
         0.02041    0.00414    0.00291    0.00278
AFIX  43
H3    2    0.866760    0.139654    0.529198    11.00000   -1.20000
AFIX   0
C4    1    0.804128    0.318620    0.489069    11.00000    0.01746    0.01515 =
         0.01829    0.00197    0.00497    0.00042
C5    1    0.788158    0.315070    0.429153    11.00000    0.01601    0.01551 =
         0.01738    0.00037    0.00231    0.00002
C6    1    0.750083    0.424206    0.393238    11.00000    0.02079    0.01547 =
         0.01485   -0.00029    0.00346    0.00221
C7    1    0.730946    0.431112    0.331951    11.00000    0.03815    0.02448 =
         0.01512   -0.00039    0.00415    0.01224
AFIX  43
H7    2    0.740891    0.361818    0.308221    11.00000   -1.20000
AFIX   0
C8    1    0.696103    0.554132    0.313789    11.00000    0.03941    0.02454 =
         0.01372    0.00291    0.00538    0.01405
AFIX  43
H8    2    0.677951    0.586576    0.275334    11.00000   -1.20000
AFIX   0
C9    1    0.691856    0.625694    0.363404    11.00000    0.02179    0.01698 =
         0.01329    0.00220    0.00496    0.00323
C10   1    0.656661    0.753843    0.363691    11.00000    0.01890    0.01496 =
         0.01408    0.00237    0.00431    0.00105
C11   1    0.651945    0.817790    0.413514    11.00000    0.01585    0.01547 =
         0.01531    0.00223    0.00435    0.00143
C12   1    0.617811    0.949165    0.416532    11.00000    0.02062    0.01719 =
         0.01883    0.00184    0.00528    0.00297
AFIX  43
H12   2    0.593638    1.008494    0.385146    11.00000   -1.20000
AFIX   0
C13   1    0.626492    0.973097    0.472796    11.00000    0.02013    0.01872 =
         0.02066   -0.00009    0.00749    0.00321
AFIX  43
H13   2    0.610521    1.053324    0.487706    11.00000   -1.20000
AFIX   0
C14   1    0.664127    0.855334    0.505604    11.00000    0.01282    0.01851 =
         0.01779   -0.00106    0.00486    0.00048
C15   1    0.683793    0.838591    0.565258    11.00000    0.01571    0.02097 =
         0.01737   -0.00240    0.00651   -0.00089
C16   1    0.721222    0.719369    0.593639    11.00000    0.01725    0.02238 =
         0.01666   -0.00159    0.00569    0.00017
C17   1    0.745989    0.679841    0.652687    11.00000    0.02662    0.02884 =
         0.01502   -0.00155    0.00610    0.00074
AFIX  43
H17   2    0.738340    0.730838    0.683182    11.00000   -1.20000
AFIX   0
C18   1    0.783118    0.554091    0.657669    11.00000    0.03038    0.02814 =
         0.01515    0.00314    0.00534    0.00197
AFIX  43
H18   2    0.805943    0.503331    0.692004    11.00000   -1.20000
AFIX   0
C19   1    0.780487    0.515724    0.601622    11.00000    0.02450    0.02122 =
         0.01558    0.00285    0.00537   -0.00002
C20   1    0.814836    0.194383    0.404514    11.00000    0.01543    0.01478 =
         0.01755    0.00082    0.00199    0.00070
C21   1    0.858543    0.207466    0.367567    11.00000    0.02123    0.02051 =
         0.01752    0.00229    0.00458    0.00074
AFIX  43
H21   2    0.869832    0.296282    0.356595    11.00000   -1.20000
AFIX   0
C22   1    0.885581    0.093312    0.346752    11.00000    0.02069    0.02712 =
         0.01452    0.00044    0.00534    0.00335
AFIX  43
H22   2    0.914520    0.105194    0.321313    11.00000   -1.20000
AFIX   0
C23   1    0.871320   -0.038257    0.362253    11.00000    0.02625    0.02128 =
         0.01693   -0.00216    0.00195    0.00731
C24   1    0.828225   -0.052223    0.398872    11.00000    0.02463    0.01505 =
         0.02153    0.00059    0.00324    0.00093
AFIX  43
H24   2    0.817709   -0.141412    0.409949    11.00000   -1.20000
AFIX   0
C25   1    0.799939    0.061644    0.419834    11.00000    0.01740    0.01593 =
         0.02055    0.00003    0.00579   -0.00145
AFIX  43
H25   2    0.770280    0.049104    0.444744    11.00000   -1.20000
AFIX   0
C26   1    0.616993    0.819868    0.306820    11.00000    0.02289    0.01536 =
         0.01466    0.00266    0.00599    0.00374
C27   1    0.649662    0.927667    0.286188    11.00000    0.02486    0.03015 =
         0.02225    0.00934    0.00238   -0.00438
AFIX  43
H27   2    0.698217    0.964955    0.309322    11.00000   -1.20000
AFIX   0
C28   1    0.612038    0.981942    0.231866    11.00000    0.02890    0.02777 =
         0.02382    0.01181    0.00542   -0.00015
AFIX  43
H28   2    0.635897    1.055095    0.218407    11.00000   -1.20000
AFIX   0
C29   1    0.540789    0.932087    0.196971    11.00000    0.02776    0.01765 =
         0.01566    0.00199    0.00381    0.00662
C30   1    0.506955    0.825702    0.218206    11.00000    0.03299    0.02987 =
         0.02351    0.00650   -0.00386   -0.00585
AFIX  43
H30   2    0.457422    0.790902    0.195674    11.00000   -1.20000
AFIX   0
C31   1    0.545089    0.770077    0.272089    11.00000    0.03081    0.02783 =
         0.02412    0.00869    0.00030   -0.00610
AFIX  43
H31   2    0.521513    0.696424    0.285487    11.00000   -1.20000
AFIX   0
C32   1    0.670865    0.953447    0.600707    11.00000    0.01902    0.02202 =
         0.01784   -0.00195    0.00688    0.00087
C33   1    0.597554    1.008064    0.593535    11.00000    0.02159    0.02647 =
         0.02580    0.00067    0.00821    0.00193
AFIX  43
H33   2    0.552949    0.969382    0.565679    11.00000   -1.20000
AFIX   0
C34   1    0.588355    1.118543    0.626486    11.00000    0.02839    0.02747 =
         0.02544    0.00315    0.01164    0.00709
AFIX  43
H34   2    0.537520    1.153566    0.620739    11.00000   -1.20000
AFIX   0
C35   1    0.651835    1.178476    0.667501    11.00000    0.03270    0.02577 =
         0.02058   -0.00036    0.00871    0.00632
C36   1    0.725725    1.122651    0.675671    11.00000    0.03228    0.03508 =
         0.03142   -0.01024    0.00767    0.00126
AFIX  43
H36   2    0.770108    1.160897    0.703903    11.00000   -1.20000
AFIX   0
C37   1    0.735047    1.012160    0.643085    11.00000    0.02293    0.03618 =
         0.03025   -0.01001    0.00603    0.00164
AFIX  43
H37   2    0.785727    0.975604    0.649558    11.00000   -1.20000
AFIX   0
C38   1    0.900294   -0.162773    0.339233    11.00000    0.05399    0.03089 =
         0.02905   -0.00419    0.01623    0.01633
AFIX 137
H38A  2    0.956938   -0.170587    0.357516    11.00000   -1.50000
H38B  2    0.887789   -0.153652    0.297611    11.00000   -1.50000
H38C  2    0.874990   -0.245026    0.347608    11.00000   -1.50000
AFIX   0
C39   1    0.502317    0.987278    0.137105    11.00000    0.03923    0.02727 =
         0.01976    0.00664    0.00021    0.00693
AFIX 137
H39A  2    0.486742    1.082764    0.139301    11.00000   -1.50000
H39B  2    0.456086    0.932146    0.117387    11.00000   -1.50000
H39C  2    0.539141    0.982761    0.115754    11.00000   -1.50000
AFIX   0
C40   1    0.642006    1.299546    0.702504    11.00000    0.04823    0.03161 =
         0.02726   -0.00476    0.01164    0.01226
AFIX 137
H40A  2    0.594874    1.350424    0.680955    11.00000   -1.50000
H40B  2    0.687555    1.359800    0.710541    11.00000   -1.50000
H40C  2    0.637203    1.267080    0.738760    11.00000   -1.50000
AFIX   0
C101  1    0.886951    0.626037    0.479195    11.00000    0.01741    0.01833 =
         0.01612    0.00021    0.00505    0.00217
AFIX  43
H101  2    0.874138    0.544353    0.457087    11.00000   -1.20000
AFIX   0
C102  1    0.959261    0.685636    0.487875    11.00000    0.01628    0.02243 =
         0.02002    0.00197    0.00620    0.00387
AFIX  43
H102  2    0.994712    0.646063    0.471394    11.00000   -1.20000
AFIX   0
C103  1    0.979280    0.803464    0.520824    11.00000    0.01542    0.02178 =
         0.02088    0.00310    0.00343    0.00078
AFIX  43
H103  2    1.028192    0.846896    0.526950    11.00000   -1.20000
AFIX   0
C104  1    0.926011    0.856378    0.544643    11.00000    0.01763    0.01722 =
         0.02133   -0.00057    0.00292    0.00040
AFIX  43
H104  2    0.938579    0.935509    0.568382    11.00000   -1.20000
AFIX   0
C105  1    0.854365    0.792777    0.533489    11.00000    0.01568    0.01769 =
         0.01883   -0.00036    0.00362    0.00216
AFIX  43
H105  2    0.818047    0.830809    0.549533    11.00000   -1.20000
AFIX   0
C201  1    0.569258    0.519295    0.424569    11.00000    0.02194    0.02633 =
         0.02608    0.00568    0.00555   -0.00129
AFIX  43
H201  2    0.575162    0.586938    0.398619    11.00000   -1.20000
AFIX   0
C202  1    0.499160    0.448849    0.410853    11.00000    0.02325    0.03419 =
         0.03235    0.00392    0.00388   -0.00258
AFIX  43
H202  2    0.458488    0.467173    0.375814    11.00000   -1.20000
AFIX   0
C203  1    0.488915    0.352320    0.448297    11.00000    0.02376    0.02498 =
         0.04692   -0.00058    0.01357   -0.00434
AFIX  43
H203  2    0.441090    0.303771    0.439919    11.00000   -1.20000
AFIX   0
C204  1    0.550051    0.327629    0.498529    11.00000    0.03010    0.02206 =
         0.03776    0.00529    0.01660   -0.00057
AFIX  43
H204  2    0.544728    0.261765    0.525346    11.00000   -1.20000
AFIX   0
C205  1    0.619147    0.400034    0.509301    11.00000    0.02638    0.02217 =
         0.02600    0.00572    0.00996    0.00156
AFIX  43
H205  2    0.661124    0.381483    0.543574    11.00000   -1.20000
AFIX   0
N1    3    0.782108    0.426751    0.514861    11.00000    0.02150    0.01545 =
         0.01481    0.00287    0.00488    0.00115
N2    3    0.725384    0.545324    0.410782    11.00000    0.01713    0.01464 =
         0.01350    0.00113    0.00312    0.00195
N3    3    0.679338    0.762976    0.467744    11.00000    0.01589    0.01627 =
         0.01379    0.00065    0.00408    0.00114
N4    3    0.741917    0.616249    0.564223    11.00000    0.01916    0.01783 =
         0.01470    0.00052    0.00522    0.00097
N100  3    0.833992    0.679382    0.500889    11.00000    0.01518    0.01496 =
         0.01545    0.00153    0.00379    0.00151
N200  3    0.628895    0.496022    0.472786    11.00000    0.01968    0.01769 =
         0.02076   -0.00043    0.00887   -0.00121
CO1   5    0.730397    0.590696    0.486804    11.00000    0.01522    0.01444 =
         0.01250    0.00134    0.00389    0.00027
CL1   4    0.449641    1.410789    0.237864    21.00000    0.04891    0.02977 =
         0.04258    0.00098    0.01181    0.00684
CL2   4    0.436538    1.156962    0.295860    31.00000    0.10391    0.04668 =
         0.05313    0.00320    0.03911   -0.01628
CL3   4    0.577717    1.270123    0.314997    41.00000    0.03716
C1D   1    0.494844    1.253844    0.268970    11.00000    0.10792    0.05670 =
         0.07942    0.02637    0.06843    0.03701
AFIX  13
H1D   2    0.502342    1.199378    0.236868    11.00000   -1.20000
AFIX   0
HKLF    4

REM  CoD_2_a.res in P2(1)/n
REM R1 =  0.0635 for   12060 Fo > 4sig(Fo)  and  0.0900 for all   16257 data
REM    551 parameters refined using      1 restraints

END

WGHT      0.0798      5.7169

REM Highest difference peak  1.057,  deepest hole -0.671,  1-sigma level  0.102
Q1    1   0.7385  0.5494  0.5141  11.00000  0.05    1.06
Q2    1   0.4084  1.2031  0.2895  11.00000  0.05    1.04
Q3    1   0.3958  1.2430  0.2538  11.00000  0.05    1.03
Q4    1   0.4450  1.4624  0.2130  11.00000  0.05    1.00
Q5    1   0.4695  1.1799  0.3066  11.00000  0.05    0.99
Q6    1   0.7368  0.6413  0.4717  11.00000  0.05    0.95
Q7    1   0.7342  0.5357  0.4693  11.00000  0.05    0.94
Q8    1   0.6086  0.3916  0.4499  11.00000  0.05    0.86
Q9    1   0.7144  0.6389  0.4978  11.00000  0.05    0.81
Q10   1   0.7066  1.0815  0.6004  11.00000  0.05    0.80
Q11   1   0.5684  1.3177  0.2977  11.00000  0.05    0.78
Q12   1   0.4596  1.1956  0.2823  11.00000  0.05    0.76
Q13   1   0.7021  1.1871  0.6364  11.00000  0.05    0.76
Q14   1   0.4658  0.4134  0.4205  11.00000  0.05    0.76
Q15   1   0.4817  1.4221  0.2607  11.00000  0.05    0.76
Q16   1   0.5532  0.6071  0.4558  11.00000  0.05    0.75
Q17   1   0.6213  0.9439  0.6369  11.00000  0.05    0.74
Q18   1   0.5373  0.3284  0.4293  11.00000  0.05    0.73
Q19   1   0.4069  1.5037  0.1869  11.00000  0.05    0.68
Q20   1   0.4195  1.3791  0.2465  11.00000  0.05    0.66
;
_shelx_res_checksum   98580

_shelx_hkl_file
;
   2   0   0 3015.80  136.09
  -2   0   0 2974.60  135.79
  -2   0   0 2860.01  136.09
   3   0   0    0.30    0.50
  -3   0   0    0.00    0.20
   4   0   0   95.29    4.40
  -4   0   0   85.19    4.10
   5   0   0   -0.20    0.70
  -5   0   0    0.10    0.30
  -6   0   0    4.60    0.50
   6   0   0    3.10    0.90
  -7   0   0    0.50    0.40
  -8   0   0  219.58   10.30
   8   0   0  212.98   10.20
  -8   0   0  213.58    9.80
  -9   0   0    0.40    0.40
  -9   0   0   -2.50    1.10
  10   0   0  198.08    9.70
 -10   0   0  208.38    9.20
 -10   0   0  200.88    9.90
 -11   0   0   -0.40    1.20
  11   0   0    0.30    1.10
 -11   0   0   -0.20    0.30
 -12   0   0    7.20    1.60
  12   0   0    6.40    1.40
  13   0   0    1.20    1.30
 -13   0   0    3.10    1.40
 -14   0   0   17.20    2.70
  14   0   0   20.70    2.50
 -15   0   0    0.70    1.60
  15   0   0    1.90    1.40
  16   0   0   -0.80    1.50
 -16   0   0    0.20    1.70
  17   0   0    2.30    1.70
  18   0   0  140.29    7.10
 -18   0   0  122.89    7.30
  19   0   0    1.80    1.90
 -19   0   0    0.50    1.80
 -20   0   0   17.80    3.50
  20   0   0   22.60    3.00
 -21   0   0    0.90    2.00
  21   0   0   -0.50    2.10
 -22   0   0   21.60    3.60
  22   0   0   20.10    3.40
 -23   0   0   -1.50    2.20
  23   0   0    1.80    2.30
 -24   0   0    7.20    2.70
  24   0   0    1.00    2.30
  25   0   0    0.20    2.60
 -25   0   0    1.20    2.60
  26   0   0   99.89    6.40
 -26   0   0   83.99    6.30
   0  -1   0    0.40    0.40
   0  -1   0    2.60    2.30
   0  -1   0    0.50    2.80
   0   1   0   -1.80    2.10
   1  -1   0    2.50    0.40
   1   1   0    2.40    0.40
  -1   1   0    1.70    0.40
   1   1   0    2.50    0.40
   1   1   0    2.70    0.40
   2  -1   0 1131.09   63.79
  -2  -1   0 1379.16   60.29
  -2  -1   0 1254.17   58.69
  -2  -1   0 1401.06   60.49
   2  -1   0 1189.78   63.29
   2  -1   0 1238.38   58.29
  -2   1   0 1238.78   63.69
   2   1   0 1450.05   60.59
   2   1   0 1404.76   60.29
  -2   1   0 1185.08   63.89
   3  -1   0   75.79    3.70
   3   1   0   77.29    3.40
   3   1   0   78.89    3.60
  -3   1   0   75.19    3.50
   3   1   0   74.89    3.80
  -3   1   0   66.69    3.60
  -4  -1   0 2089.39   97.79
   4  -1   0 2057.69  105.29
   4  -1   0 1993.50  106.19
  -4  -1   0 2381.76  102.09
  -4  -1   0 2260.77  102.69
   4  -1   0 2106.49   97.59
  -4   1   0 2111.39  106.29
  -4   1   0 2082.29   97.39
   4   1   0 2167.48  102.19
  -4   1   0 1947.51  105.89
   4   1   0 2150.38   98.09
   4   1   0 2451.55  102.59
   5  -1   0   75.09    3.80
  -5  -1   0   72.09    3.40
  -5   1   0   73.79    3.60
   5   1   0   76.09    3.90
  -5   1   0   75.19    3.80
   5   1   0   74.29    3.70
   6  -1   0  911.11   41.40
  -6   1   0  937.61   41.30
  -6   1   0  915.71   41.50
   6   1   0  901.81   41.40
   7  -1   0  273.87   12.70
  -7   1   0  277.77   12.50
   7   1   0  272.97   12.70
  -7   1   0  267.87   12.70
   8  -1   0    5.20    1.10
   8   1   0    2.50    0.90
  -8   1   0    4.00    0.70
  -8   1   0    2.10    1.10
   9  -1   0   38.50    2.50
  -9  -1   0   37.90    3.10
  -9   1   0   43.20    2.20
  -9   1   0   38.30    2.80
   9   1   0   40.70    2.50
  10  -1   0   42.60    2.90
 -10  -1   0   41.50    3.30
  10   1   0   43.20    2.80
 -10   1   0   47.00    2.40
 -10   1   0   44.40    3.00
  11  -1   0  216.98   10.40
 -11  -1   0  218.68   10.60
 -11   1   0  213.68   10.40
  11   1   0  205.58   10.30
 -11   1   0  220.98    9.90
  12  -1   0   41.20    3.00
 -12  -1   0   36.70    3.30
  12   1   0   41.90    2.90
 -12   1   0   41.90    2.20
 -12   1   0   38.90    3.00
 -13  -1   0  104.79    5.80
  13  -1   0   98.19    5.50
  13   1   0   99.49    5.40
 -13   1   0   99.29    5.60
 -13   1   0  100.89    4.80
  14  -1   0    2.00    1.50
 -14  -1   0    0.60    1.60
 -14   1   0   -0.70    1.40
 -14   1   0    0.80    0.70
  14   1   0    1.60    1.40
 -15  -1   0    0.80    1.70
  15  -1   0    2.20    1.50
 -15   1   0    2.00    1.60
  15   1   0    1.90    1.50
 -16  -1   0   55.09    4.20
  16  -1   0   50.09    3.70
 -16   1   0   46.40    3.80
  16   1   0   58.09    3.80
  17  -1   0   94.49    5.60
 -17  -1   0   95.09    5.80
 -17   1   0   92.99    5.70
  17   1   0   98.79    5.60
 -18  -1   0   11.60    2.30
  18  -1   0   14.90    2.30
  18   1   0   17.80    2.80
 -18   1   0   18.40    3.10
  19  -1   0   97.89    5.80
 -19  -1   0   99.59    6.00
 -19   1   0   96.89    5.90
  19   1   0   97.39    5.80
  20  -1   0    0.90    1.90
 -20  -1   0    1.10    2.10
 -20   1   0    2.60    2.10
  20   1   0    0.40    1.80
  21  -1   0   32.20    3.60
 -21  -1   0   27.90    3.60
  21   1   0   26.40    3.50
 -21   1   0   26.70    3.60
  22  -1   0   36.10    3.90
 -22  -1   0   26.90    4.00
  22   1   0   32.20    3.80
 -22   1   0   26.90    4.10
  23  -1   0   12.90    2.60
 -23  -1   0   12.10    2.80
  23   1   0    9.70    2.50
 -23   1   0    9.30    2.60
  24  -1   0    0.50    2.40
 -24  -1   0    0.90    2.40
  24   1   0   -0.60    2.50
 -24   1   0   -1.40    2.40
  25  -1   0    4.30    2.80
 -25  -1   0    1.10    2.60
 -25   1   0   -2.10    2.80
  25   1   0   -4.70    2.50
  26  -1   0   -1.50    2.70
 -26  -1   0    2.70    2.70
  26   1   0   -0.80    2.60
   0   2   0   53.79    2.60
   0   2   0   53.49    2.90
   0   2   0   53.89    2.70
   1  -2   0  105.29    5.10
   1   2   0  111.79    5.00
  -1   2   0  104.39    5.00
   1   2   0  107.99    5.10
   1   2   0  100.49    5.00
   2  -2   0  606.74   27.00
   2   2   0  596.94   27.00
  -2   2   0  589.34   26.90
  -2   2   0  590.04   26.80
   2   2   0  593.74   26.90
   2   2   0  596.04   27.00
   3  -2   0 1693.03   76.99
   3   2   0 1729.13   77.09
   4  -2   0  400.56   18.70
   4   2   0  402.76   18.80
  -4   2   0  407.76   18.60
   4   2   0  406.96   18.50
   4   2   0  421.16   18.70
  -4   2   0  417.46   18.50
   5  -2   0  997.90   45.00
   5   2   0  964.30   44.70
   5   2   0  994.00   45.10
   5   2   0  969.50   45.00
  -5   2   0 1038.00   44.90
  -5   2   0 1008.10   44.90
  -6   2   0 1192.58   50.79
   6   2   0  986.50   50.89
  -6   2   0 1187.18   50.79
   6   2   0 1133.49   50.99
   7  -2   0  359.66   16.90
   7   2   0  357.36   16.90
  -7   2   0  371.06   16.70
  -7   2   0  378.26   16.80
  -8  -2   0  414.56   19.70
   8  -2   0  458.45   20.20
  -8   2   0  447.96   20.00
   8   2   0  432.46   20.10
   9  -2   0   61.89    3.60
   9   2   0   65.29    3.50
  -9   2   0   60.39    3.20
  -9   2   0   61.89    3.50
  10  -2   0  154.28    7.60
 -10  -2   0  150.18    7.90
 -10   2   0  163.08    7.30
  10   2   0  149.29    7.60
 -11  -2   0   -1.00    1.40
  11  -2   0    0.90    1.20
 -11   2   0   -1.20    1.00
  11   2   0    0.00    1.00
 -11   2   0    1.10    0.70
 -12  -2   0  153.28    8.10
  12  -2   0  157.88    7.90
  12   2   0  152.38    7.80
 -12   2   0  156.18    7.80
 -12   2   0  163.28    7.50
  13  -2   0    0.80    1.40
 -13  -2   0   -1.00    1.60
 -13   2   0    2.30    0.90
  13   2   0    1.00    1.20
 -13   2   0    0.90    1.20
  14  -2   0    1.50    1.40
 -14  -2   0   -0.30    1.80
 -14   2   0    2.00    1.40
  14   2   0    0.30    1.40
 -14   2   0   -0.30    1.00
  15  -2   0   -0.60    1.50
 -15  -2   0   -0.70    1.70
 -15   2   0    0.60    1.40
 -15   2   0    0.90    1.00
  15   2   0   -1.60    1.40
 -16  -2   0   27.60    3.40
  16  -2   0   31.60    3.20
  16   2   0   27.70    3.00
 -16   2   0   35.40    3.10
  17  -2   0   40.10    3.60
 -17  -2   0   36.80    3.80
 -17   2   0   40.50    3.50
  17   2   0   39.00    3.40
  18  -2   0   56.79    4.20
 -18  -2   0   47.30    4.40
  18   2   0   60.69    4.20
 -18   2   0   55.59    4.20
 -19  -2   0    6.50    2.20
  19  -2   0    9.50    2.30
 -19   2   0    6.40    2.10
  19   2   0    9.30    2.20
  20  -2   0   41.50    4.00
 -20  -2   0   42.60    4.00
 -20   2   0   34.70    3.90
  20   2   0   44.90    4.00
  21  -2   0   21.90    3.00
 -21  -2   0   15.90    2.80
  21   2   0   23.20    3.50
 -21   2   0   19.00    3.40
  22  -2   0   19.80    2.80
 -22  -2   0   16.70    3.40
 -22   2   0   10.00    2.60
  22   2   0   19.10    3.00
 -23  -2   0   50.99    5.10
  23  -2   0   66.49    4.80
  23   2   0   56.59    4.80
 -23   2   0   47.30    4.80
  24  -2   0   -1.00    2.30
 -24  -2   0    0.70    2.50
 -24   2   0   -2.60    2.40
  24   2   0   -3.40    2.40
 -25  -2   0    9.20    2.70
  25  -2   0   12.60    2.80
 -25   2   0   10.20    3.00
  25   2   0   13.50    3.00
 -26  -2   0   -1.50    2.70
  26  -2   0   -1.30    2.70
  26   2   0   -3.30    2.90
   0   3   0    0.00    0.70
   0   3   0    1.10    0.50
   0   3   0    1.80    0.80
   1  -3   0    4.80    0.90
   1   3   0    2.40    0.90
   1   3   0    2.60    0.60
   1   3   0    1.90    0.70
  -1   3   0    3.30    0.80
   2  -3   0  143.69    6.80
   2   3   0  140.79    6.70
   2   3   0  137.89    6.60
  -2   3   0  137.39    6.60
   2   3   0  140.49    6.60
   3  -3   0   84.19    4.30
   3   3   0   81.19    4.20
  -3   3   0   83.19    3.80
   3   3   0   83.59    4.00
  -3   3   0   78.59    4.10
   3   3   0   82.79    4.20
   4  -3   0   36.10    2.40
   4   3   0   38.90    2.30
  -4   3   0   38.40    1.80
   4   3   0   36.80    2.30
  -4   3   0   31.60    2.10
   4   3   0   33.90    1.90
   5  -3   0   59.39    3.30
   5   3   0   48.90    3.10
  -5   3   0   59.89    3.10
   5   3   0   51.69    2.80
   5   3   0   58.29    3.30
  -5   3   0   62.39    2.80
   6  -3   0  839.52   38.50
  -6   3   0  845.42   38.40
   6   3   0  851.61   38.50
   6   3   0  837.92   38.20
  -6   3   0  864.41   38.30
   7  -3   0    5.20    1.20
   7   3   0    5.70    0.80
   7   3   0    7.30    1.20
  -7   3   0    6.20    1.10
   8  -3   0  122.29    5.90
   8   3   0  116.99    5.40
  -8   3   0  115.79    5.70
  -8   3   0  119.89    5.70
   8   3   0  108.89    5.90
   9  -3   0  228.88   11.00
  -9   3   0  235.28   10.80
  -9   3   0  227.28   10.80
   9   3   0  234.18   11.00
 -10  -3   0  211.08    9.70
  10  -3   0  215.58   10.30
 -10  -3   0  214.88   10.60
  10   3   0  214.18   10.30
 -10   3   0  214.28   10.10
 -10   3   0  217.48   10.10
 -11  -3   0    7.70    2.00
  11  -3   0   13.00    2.10
 -11   3   0   10.70    1.70
  11   3   0   12.40    2.00
 -11   3   0   15.30    1.60
 -12  -3   0  135.69    7.50
  12  -3   0  138.19    7.20
  12   3   0  134.29    7.20
 -12   3   0  151.38    6.90
 -12   3   0  139.99    7.00
 -13  -3   0    6.80    2.10
  13  -3   0   10.10    1.90
  13   3   0   10.30    1.70
 -13   3   0   10.20    1.60
 -13   3   0    8.90    1.30
 -14  -3   0    4.90    1.90
  14  -3   0    9.00    1.80
  14   3   0    6.90    1.80
 -14   3   0    6.60    1.60
 -15  -3   0    9.50    2.30
  15  -3   0    7.70    1.90
  15   3   0   11.00    2.00
 -15   3   0    8.50    1.70
  16  -3   0   43.70    3.70
 -16  -3   0   37.30    3.90
 -16   3   0   49.10    3.70
 -16   3   0   39.00    3.40
  17  -3   0   -0.70    1.80
 -17  -3   0   -1.30    1.90
  17   3   0    0.10    1.70
 -17   3   0   -0.30    1.60
 -18  -3   0   24.30    3.70
  18  -3   0   28.40    3.30
  18   3   0   29.10    3.40
 -18   3   0   28.60    4.60
  19  -3   0    9.90    2.20
 -19  -3   0   11.10    2.50
 -19   3   0    7.80    2.10
  19   3   0   10.60    2.20
  20  -3   0   27.10    3.50
 -20  -3   0   20.60    3.80
 -20   3   0   23.30    3.50
  20   3   0   22.70    3.50
 -21  -3   0    9.70    2.60
  21  -3   0   15.00    2.70
  21   3   0    7.50    2.60
 -21   3   0    8.30    2.40
  22  -3   0   24.10    3.80
 -22  -3   0   13.60    2.70
  22   3   0   22.30    3.20
 -22   3   0   10.90    2.80
  23  -3   0    7.20    2.80
 -23  -3   0    4.30    2.70
 -23   3   0    2.60    2.40
  23   3   0    4.50    2.80
  24  -3   0   14.20    3.10
 -24  -3   0    9.50    2.80
  24   3   0   15.40    3.20
 -24   3   0    5.20    2.90
  25   3   0   26.70    5.70
  26  -3   0    3.60    2.90
 -26  -3   0    1.60    2.90
  26   3   0    2.20    3.30
   0   4   0   62.19    3.40
   1  -4   0  360.06   18.20
  -1   4   0  369.76   17.90
   1   4   0  422.16   17.70
   1   4   0  401.16   17.80
   2  -4   0   88.89    4.50
   2   4   0   83.59    4.50
   2   4   0   84.19    4.20
  -2   4   0   82.09    4.30
   2   4   0   82.89    4.20
   3  -4   0    2.00    1.10
   3   4   0    4.80    0.90
  -3   4   0    3.50    1.00
   3   4   0    5.00    0.90
   3   4   0    5.20    1.10
   4  -4   0  502.55   22.90
  -4   4   0  502.35   22.80
   4   4   0  494.25   22.70
  -4   4   0  492.55   22.50
   4   4   0  499.95   22.90
   4   4   0  499.05   22.90
   5  -4   0  767.42   34.40
  -5   4   0  739.23   34.00
  -5   4   0  735.33   34.30
   5   4   0  762.92   34.10
   5   4   0  768.82   34.40
   6  -4   0  426.16   19.70
  -6   4   0  424.56   19.60
   6   4   0  421.86   19.40
   6   4   0  406.16   19.70
  -6   4   0  450.35   19.30
   7  -4   0    3.50    1.30
   7   4   0    3.20    1.20
   7   4   0    2.00    0.60
  -7   4   0    3.10    0.70
  -7   4   0   -0.40    0.90
   8  -4   0   11.40    1.60
  -8   4   0   11.70    1.70
   8   4   0   10.70    1.00
  -8   4   0   11.90    1.30
   8   4   0   13.10    1.90
   9  -4   0   75.49    4.40
  -9  -4   0   76.09    4.80
   9   4   0   79.29    3.80
  -9   4   0   74.89    4.10
   9   4   0   77.89    4.40
 -10  -4   0    0.30    1.50
  10  -4   0    2.70    1.40
 -10   4   0    1.90    1.10
  10   4   0    2.40    0.70
 -10   4   0    2.00    0.90
  10   4   0    4.60    1.40
  11  -4   0    5.90    1.50
 -11  -4   0    2.20    1.90
 -11   4   0    7.70    1.30
  11   4   0    6.50    1.50
 -12  -4   0   -1.40    1.80
  12  -4   0    1.50    1.50
 -12   4   0    1.30    1.10
  12   4   0    1.10    1.40
 -12   4   0   -0.50    1.10
 -13  -4   0   41.50    4.10
  13  -4   0   49.00    3.60
 -13   4   0   48.70    3.20
 -13   4   0   48.80    3.20
  13   4   0   50.59    3.70
 -14  -4   0   30.70    3.70
  14  -4   0   34.70    3.20
 -14   4   0   30.60    2.70
  14   4   0   34.00    3.30
 -14   4   0   34.80    2.70
 -15  -4   0   42.60    4.70
 -15   4   0   54.89    3.40
  15   4   0   47.40    3.90
 -15   4   0   49.70    3.50
  16  -4   0    3.70    1.80
 -16  -4   0    5.70    2.30
  16   4   0    3.70    1.90
 -16   4   0    3.90    1.50
 -16   4   0    2.70    1.60
 -17  -4   0    4.00    2.20
  17  -4   0    4.20    2.10
  17   4   0    4.80    2.10
 -17   4   0    3.10    1.70
  18  -4   0    4.10    2.20
 -18  -4   0    1.60    2.10
  18   4   0    2.00    2.20
 -18   4   0    2.40    2.00
 -19  -4   0    5.90    2.40
  19  -4   0    6.10    2.30
 -19   4   0    0.80    2.10
  19   4   0    4.80    2.20
  20  -4   0   -1.70    2.20
 -20  -4   0    1.70    2.20
  20   4   0    2.40    2.40
 -20   4   0    1.10    2.10
  21  -4   0    2.70    2.40
 -21  -4   0    1.40    2.40
 -21   4   0   -4.40    2.10
  21   4   0    3.20    2.50
  22  -4   0   -3.30    2.20
 -22  -4   0    0.70    2.30
  22   4   0    2.70    2.80
 -22   4   0   -2.00    2.50
  23  -4   0   38.80    4.50
 -23  -4   0   43.30    4.70
  23   4   0   40.40    4.70
  24  -4   0    7.80    2.90
 -24  -4   0    7.60    2.80
  24   4   0    7.60    2.90
 -24   4   0    0.00    2.70
 -25  -4   0   22.20    4.20
  25   4   0   31.10    4.70
 -25   4   0   16.50    3.60
   0   5   0    0.10    0.90
   0   5   0    0.20    1.10
   1  -5   0  161.58    7.90
   1   5   0  158.68    7.80
   1   5   0  153.38    7.50
  -1   5   0  158.28    7.70
   2   5   0  327.57   15.50
   2   5   0  388.46   16.80
  -2   5   0  303.87   15.70
   3  -5   0   27.30    2.30
  -3   5   0   25.20    2.00
   3   5   0   26.10    2.40
   3   5   0   31.80    2.00
   4  -5   0   12.20    1.90
  -4   5   0   11.80    1.70
   4   5   0   14.70    1.80
   4   5   0   11.30    1.40
   5  -5   0  171.38    8.60
   5   5   0  182.68    8.70
   5   5   0  172.38    8.30
  -5   5   0  174.28    8.40
   6  -5   0   15.60    2.00
   6   5   0   14.20    1.40
  -6   5   0   13.50    1.60
   6   5   0   15.80    2.10
   7  -5   0  202.78    9.70
   7   5   0  205.48    9.80
  -7   5   0  192.18    9.20
  -7   5   0  202.08    9.60
  -8  -5   0    0.60    1.50
   8  -5   0    1.10    1.40
   8   5   0    0.20    1.10
  -8   5   0    1.40    1.10
  -8   5   0    0.50    0.70
   8   5   0    0.80    1.40
   9  -5   0  135.19    7.20
  -9  -5   0  144.59    7.40
  -9   5   0  137.79    6.70
   9   5   0  134.49    6.70
  -9   5   0  141.79    7.00
   9   5   0  149.19    7.30
  10  -5   0   32.30    2.90
 -10  -5   0   32.20    3.20
 -10   5   0   29.60    2.50
  10   5   0   29.80    2.90
  10   5   0   31.10    2.00
 -10   5   0   31.70    2.20
 -11  -5   0   79.09    5.20
  11  -5   0   83.39    5.00
 -11   5   0   79.99    4.40
 -11   5   0   79.39    4.60
  11   5   0   86.89    5.00
  11   5   0   85.79    4.10
  12  -5   0   15.10    2.50
 -12  -5   0   13.40    2.30
  12   5   0   19.10    2.70
 -12   5   0   13.10    2.00
 -12   5   0   14.60    2.10
 -13  -5   0   16.40    3.20
  13  -5   0   21.60    2.80
 -13   5   0   15.00    2.20
  13   5   0   17.10    2.90
 -13   5   0   20.30    2.40
 -14  -5   0    1.80    2.10
 -14   5   0    2.90    1.50
 -14   5   0    4.00    1.40
  14   5   0    5.00    2.10
  15  -5   0  150.18    8.00
 -15  -5   0  149.99    8.30
 -15   5   0  146.19    7.60
  15   5   0  150.88    8.10
 -15   5   0  148.89    7.70
  16  -5   0   49.80    4.00
 -16  -5   0   39.80    4.50
 -16   5   0   59.49    3.60
 -16   5   0   46.70    3.60
  16   5   0   48.40    4.20
  17  -5   0  152.78    7.90
 -17  -5   0  137.99    8.00
 -17   5   0  130.79    7.50
  17   5   0  135.89    7.90
 -17   5   0  152.18    7.50
  18  -5   0   10.60    2.40
 -18  -5   0   12.10    2.70
  18   5   0   17.50    2.80
 -18   5   0    9.00    2.40
  19  -5   0    1.70    2.30
 -19  -5   0   -0.60    2.20
  19   5   0    2.50    2.50
  20  -5   0    1.60    2.30
 -20  -5   0    1.00    2.40
  20   5   0    4.60    2.70
 -20   5   0   -4.90    2.00
 -21  -5   0   11.50    2.90
  21  -5   0   12.80    3.00
  21   5   0    9.90    2.80
 -21   5   0    6.30    2.60
  22  -5   0    1.50    2.50
 -22  -5   0   -0.40    2.40
  22   5   0    1.40    3.00
  23  -5   0    3.10    2.60
 -23  -5   0    2.70    2.80
 -23   5   0    0.20    2.90
  23   5   0    1.80    3.00
  24  -5   0    6.90    5.10
 -24  -5   0    5.20    4.00
  24   5   0    7.90    4.30
 -25  -5   0   20.10    3.60
  25  -5   0   28.30    3.90
  25   5   0   30.20    4.10
   0  -6   0   61.49    3.00
   0   6   0   59.39    3.40
   1  -6   0  164.18    8.20
  -1  -6   0  169.08    7.60
   1   6   0  160.18    8.20
   1   6   0  159.08    7.90
  -1   6   0  159.98    7.90
  -2  -6   0  536.35   23.10
   2  -6   0  511.35   23.50
   2   6   0  503.25   23.50
   2   6   0  492.15   23.20
  -2   6   0  489.85   23.30
  -3  -6   0   86.69    4.20
   3  -6   0   79.79    4.60
  -3   6   0   69.29    4.20
   3   6   0   79.19    4.60
   3   6   0   76.69    4.10
   4  -6   0  363.36   16.60
   4   6   0  359.86   16.30
  -4   6   0  338.07   16.40
   4   6   0  348.97   16.60
   5  -6   0   12.30    1.80
  -5  -6   0   12.10    1.70
   5   6   0   13.10    2.00
  -5   6   0    9.60    1.50
   5   6   0    9.40    1.40
   6  -6   0  136.19    7.10
   6   6   0  135.09    7.20
  -6   6   0  140.39    6.90
  -7  -6   0   41.70    3.20
   7  -6   0   39.80    3.10
  -7   6   0   39.90    2.80
   7   6   0   45.40    3.20
   7   6   0   39.50    2.60
   8  -6   0   14.20    2.10
  -8  -6   0   14.30    2.00
   8   6   0    9.70    1.50
  -8   6   0   12.90    1.70
   8   6   0    9.40    1.80
   9  -6   0   92.09    5.20
  -9  -6   0   90.99    5.40
  -9   6   0   85.59    4.90
   9   6   0   81.89    4.50
  -9   6   0   91.39    4.50
   9   6   0   92.39    5.30
 -10  -6   0   69.29    4.70
  10  -6   0   63.09    4.40
  10   6   0   63.89    3.70
 -10   6   0   71.59    3.60
  10   6   0   70.09    4.50
 -10   6   0   69.59    4.10
 -11  -6   0   12.50    2.30
  11  -6   0    8.60    1.90
  11   6   0   11.70    2.10
 -11   6   0   14.20    1.70
  11   6   0   10.70    1.60
 -11   6   0   10.40    1.80
 -12  -6   0    6.20    2.20
  12  -6   0    7.80    2.20
 -12   6   0    8.50    1.40
  12   6   0    4.90    1.80
 -12   6   0    4.70    1.50
 -13  -6   0   11.60    2.40
  13  -6   0   11.60    2.40
  13   6   0   11.80    3.20
 -13   6   0   12.20    1.90
 -13   6   0   13.20    2.00
 -14  -6   0   -1.50    2.30
  14  -6   0   -1.70    1.80
 -14   6   0    1.40    1.30
 -14   6   0   -1.60    1.40
  14   6   0    0.30    1.90
 -15  -6   0    8.20    2.40
  15  -6   0    8.40    2.20
  15   6   0    5.80    2.10
 -15   6   0    9.20    1.80
 -15   6   0    6.60    1.90
  16  -6   0   30.30    3.70
 -16  -6   0   28.60    3.70
 -16   6   0   27.00    3.90
  16   6   0   30.80    3.80
 -16   6   0   29.60    3.10
 -17  -6   0    1.40    2.30
  17  -6   0    5.10    2.40
 -17   6   0    2.20    2.40
 -17   6   0    6.40    1.90
  17   6   0    3.10    2.30
 -18  -6   0    9.80    2.60
  18  -6   0   11.80    2.50
  18   6   0   13.00    2.60
 -18   6   0   14.80    2.30
  19  -6   0    3.00    2.40
 -19  -6   0    2.80    2.40
  19   6   0    0.10    2.30
 -20  -6   0    7.30    2.70
  20  -6   0   10.00    2.70
  20   6   0    9.20    2.70
 -21  -6   0   -0.10    2.50
  21  -6   0    0.80    2.60
  21   6   0   -1.10    2.80
  22  -6   0   14.20    3.20
 -22  -6   0   14.10    3.30
  22   6   0   17.60    3.70
 -23  -6   0   -3.60    2.60
  23  -6   0   -2.90    3.10
  23   6   0    2.30    3.10
 -24  -6   0   12.20    3.30
  24  -6   0   14.90    3.20
  24   6   0   16.20    3.90
   0  -7   0   -0.40    1.50
   0   7   0   -0.70    1.10
  -1  -7   0  102.59    4.70
   1  -7   0   93.69    5.50
  -1   7   0   92.99    5.10
   1   7   0   99.49    5.10
   1   7   0   89.89    5.50
   2  -7   0    4.70    1.60
  -2  -7   0    7.80    1.40
   2   7   0    4.60    1.20
  -2   7   0    6.70    1.50
   2   7   0    7.70    1.90
  -3  -7   0   40.20    2.60
   3  -7   0   36.90    3.20
  -3   7   0   33.60    2.60
   3   7   0   34.20    3.20
   3   7   0   36.80    2.60
  -4  -7   0   28.10    2.60
   4  -7   0   31.40    3.00
   4   7   0   33.40    2.40
   4   7   0   35.10    3.10
  -4   7   0   32.10    2.50
   5  -7   0   34.30    3.10
  -5  -7   0   32.30    2.80
   5   7   0   32.50    2.50
  -5   7   0   29.80    2.50
   5   7   0   37.20    3.30
   6  -7   0  105.09    5.80
  -6  -7   0  106.29    5.80
  -6   7   0  101.29    5.60
   6   7   0  108.89    5.50
   6   7   0  107.39    6.10
   7  -7   0   48.80    3.80
  -7  -7   0   54.29    3.80
   7   7   0   47.00    3.10
   7   7   0   52.89    3.80
  -7   7   0   46.80    3.40
  -8  -7   0   37.30    3.30
   8  -7   0   29.40    3.20
   8   7   0   32.60    3.40
  -8   7   0   31.20    2.70
   8   7   0   33.50    2.40
  -9  -7   0   83.09    5.10
   9  -7   0   80.79    5.00
   9   7   0   79.19    5.10
   9   7   0   74.09    4.20
  -9   7   0   78.79    4.60
  10  -7   0   38.70    3.40
 -10  -7   0   34.10    3.60
  10   7   0   36.30    3.60
 -10   7   0   37.20    3.10
  10   7   0   36.90    2.60
  11  -7   0   47.50    5.10
 -11  -7   0   56.69    4.30
  11   7   0   51.49    3.30
 -11   7   0   51.89    3.70
  11   7   0   49.20    4.10
  12  -7   0  111.89    6.50
 -12  -7   0  112.49    6.60
  12   7   0  111.69    6.70
 -12   7   0  114.59    6.20
 -13  -7   0   76.99    6.00
  13  -7   0   83.09    5.30
 -13   7   0   84.29    4.90
  13   7   0   82.19    5.50
 -14  -7   0   72.29    5.50
  14  -7   0   74.29    5.20
  14   7   0   81.69    5.40
 -14   7   0   79.99    4.90
  15  -7   0   39.50    3.90
 -15  -7   0   34.20    4.30
 -15   7   0   32.20    4.40
  15   7   0   36.70    4.10
  16  -7   0   86.89    5.60
 -16  -7   0   70.29    5.80
  16   7   0   94.79    6.00
 -16   7   0   84.79    5.30
 -17  -7   0   32.00    4.00
  17  -7   0   37.70    4.10
  17   7   0   34.10    4.20
 -17   7   0   40.20    3.90
  18  -7   0    2.50    2.50
 -18  -7   0    2.40    2.60
  18   7   0    3.20    2.80
 -18   7   0    1.10    2.00
  19  -7   0    5.80    2.70
 -19  -7   0    1.20    2.70
 -19   7   0    0.60    2.70
  19   7   0    4.20    3.00
  20  -7   0    9.50    2.80
 -20  -7   0    6.80    2.80
  20   7   0   13.40    3.40
 -21  -7   0   14.60    3.40
  21  -7   0   16.10    3.40
  21   7   0   20.20    3.80
  22  -7   0    6.80    3.00
 -22  -7   0    6.50    3.10
  22   7   0   15.90    3.80
 -23  -7   0    1.90    2.80
  23  -7   0    2.10    3.30
  23   7   0   -4.40    3.10
   0  -8   0  257.47   12.20
   0   8   0  236.98   11.80
   1  -8   0  173.08    9.00
   1   8   0  173.98    8.60
  -1   8   0  176.28    8.60
  -2  -8   0   70.19    3.90
   2  -8   0   73.89    4.70
   2   8   0   75.19    4.30
  -2   8   0   70.79    4.30
   2   8   0   80.99    4.80
  -3  -8   0    1.50    1.10
   3  -8   0    0.00    1.60
   3   8   0   -0.20    1.20
  -3   8   0    1.80    1.40
   3   8   0    2.50    1.80
  -4  -8   0   49.99    3.20
   4  -8   0   48.50    3.80
   4   8   0   48.30    4.00
  -4   8   0   47.10    3.40
   4   8   0   46.50    3.20
   5  -8   0   56.99    4.20
  -5   8   0   61.89    3.80
   5   8   0   56.79    3.60
   5   8   0   54.39    4.40
  -6  -8   0   63.09    4.10
   6  -8   0   60.19    4.40
   6   8   0   61.19    3.80
   6   8   0   67.09    4.70
  -6   8   0   58.29    4.00
  -7  -8   0   33.50    3.10
   7  -8   0   31.80    3.30
   7   8   0   27.60    3.50
  -7   8   0   30.40    2.90
   7   8   0   28.70    2.60
  -8  -8   0    1.50    1.80
   8  -8   0    2.20    1.80
   8   8   0    1.90    1.20
  -8   8   0    1.70    1.60
   8   8   0    0.50    1.90
  -9  -8   0    8.10    2.10
   9   8   0   10.00    1.60
  -9   8   0   10.70    1.90
   9   8   0   13.90    2.50
  10  -8   0   24.00    3.20
 -10  -8   0   16.40    2.70
 -10   8   0   24.20    3.40
  10   8   0   20.30    2.90
  10   8   0   20.80    2.30
 -11  -8   0    3.90    2.10
  11  -8   0    5.50    2.10
 -11   8   0    7.20    1.90
  11   8   0    6.40    1.50
  11   8   0    4.40    2.30
 -12  -8   0   31.30    3.80
  12  -8   0   35.50    3.60
 -12   8   0   37.00    3.30
  12   8   0   31.70    4.00
  13  -8   0    5.60    2.10
 -13  -8   0    6.40    2.50
 -13   8   0    3.90    1.80
  13   8   0    2.60    2.30
 -14  -8   0   -2.10    2.20
  14  -8   0   -2.00    2.10
 -14   8   0    0.00    1.80
  14   8   0   -2.50    2.30
  15  -8   0   26.40    3.80
 -15  -8   0   21.40    3.80
  15   8   0   24.80    3.40
 -15   8   0   26.70    3.40
 -16  -8   0    6.80    2.70
  16  -8   0    4.60    2.30
  16   8   0    9.80    2.70
 -16   8   0    6.60    2.10
  17  -8   0   10.60    2.60
 -17  -8   0    9.30    3.00
  17   8   0   18.70    3.40
 -17   8   0   14.20    2.60
  18  -8   0    0.90    2.60
 -18  -8   0   -2.30    2.80
 -18   8   0    4.80    2.30
  18   8   0    2.00    2.80
 -19  -8   0   21.20    3.50
  19  -8   0   31.50    4.40
  19   8   0   31.80    4.10
 -19   8   0   22.50    3.60
  20  -8   0    2.90    2.80
 -20  -8   0    4.00    3.00
  20   8   0   14.20    3.70
  21  -8   0   30.80    4.20
  21   8   0   30.80    4.50
 -22  -8   0   -0.50    3.00
  22  -8   0    1.20    3.00
  22   8   0    2.60    3.60
   0  -9   0   -0.10    1.90
   0   9   0   -0.80    1.30
  -1  -9   0   40.30    3.90
   1  -9   0   42.90    3.70
  -1   9   0   41.10    3.20
   1   9   0   43.40    3.20
   2  -9   0   19.50    3.20
   2   9   0   14.90    2.00
  -2   9   0   11.80    1.90
   3  -9   0   56.79    4.40
   3   9   0   55.99    4.30
   3   9   0   58.89    3.70
  -3   9   0   55.39    3.80
  -4  -9   0    4.30    1.90
   4  -9   0    7.90    2.10
   4   9   0    6.10    1.60
   4   9   0    9.10    2.30
  -4   9   0    4.30    1.60
  -5  -9   0   -2.10    1.70
   5  -9   0   -0.50    2.60
   5   9   0    1.80    2.00
   5   9   0    3.10    1.40
  -6  -9   0   73.59    4.60
   6  -9   0   70.59    5.00
  -6   9   0   70.59    4.40
   6   9   0   78.79    4.50
  -7  -9   0    2.20    1.80
   7  -9   0   -1.00    1.70
   7   9   0   -0.60    1.50
  -7   9   0    0.50    1.50
   7   9   0    2.50    2.20
  -8  -9   0  247.88   12.30
   8  -9   0  249.18   12.40
  -8   9   0  255.07   12.20
   8   9   0  238.48   12.60
   8   9   0  253.17   12.10
   9  -9   0    2.40    1.90
  -9  -9   0    1.90    2.00
   9   9   0    6.80    1.60
  -9   9   0    3.20    1.70
   9   9   0    3.00    2.10
 -10  -9   0   79.89    5.50
  10  -9   0   86.89    5.60
  10   9   0   87.69    5.80
  10   9   0   85.99    5.00
 -10   9   0   84.59    5.10
  11  -9   0   54.59    4.50
 -11  -9   0   56.59    4.70
  11   9   0   50.89    4.80
  11   9   0   61.59    4.00
 -11   9   0   58.69    4.10
 -12  -9   0   35.60    4.20
  12  -9   0   43.20    4.20
 -12   9   0   44.50    3.70
  12   9   0   48.10    4.70
  13  -9   0    7.60    2.40
 -13  -9   0    7.80    2.60
  13   9   0    8.40    2.70
 -13   9   0    9.50    2.10
 -14  -9   0    3.20    2.70
  14  -9   0    5.80    2.50
  14   9   0    3.50    2.60
 -14   9   0    4.60    2.00
 -15  -9   0   -3.30    2.50
  15  -9   0    3.50    2.50
  15   9   0   -2.30    2.50
 -15   9   0   -0.90    1.90
  16  -9   0   15.60    3.00
 -16   9   0   13.20    2.70
  16   9   0    8.60    3.10
 -17  -9   0   -1.80    2.80
  17  -9   0    1.70    2.80
  17   9   0   -3.70    2.90
 -17   9   0    0.70    2.10
  18  -9   0   -1.80    2.50
 -18  -9   0   -0.60    2.90
 -18   9   0    2.70    2.40
  18   9   0   -1.80    3.10
  19  -9   0    2.40    2.90
 -19  -9   0    0.70    2.90
 -19   9   0   -3.40    2.60
  19   9   0    3.30    3.60
 -20  -9   0   14.20    3.40
  20   9   0   24.50    4.70
  21  -9   0    1.60    2.90
 -21  -9   0   -4.00    3.10
  21   9   0    7.70    4.10
   0 -10   0   41.70    4.10
   0  10   0   45.60    3.40
  -1 -10   0    7.50    2.40
   1 -10   0    1.80    2.00
  -1  10   0    5.70    1.60
   1  10   0    7.60    1.80
   2 -10   0   33.90    4.00
  -2 -10   0   35.00    4.00
   2  10   0   42.20    3.10
  -2  10   0   42.50    3.30
   3 -10   0    1.60    2.00
  -3  10   0    2.30    1.50
   3  10   0    7.00    3.20
   4 -10   0   15.40    2.60
   4  10   0   13.50    2.90
  -4  10   0   17.70    2.30
   5 -10   0    2.30    2.20
   5  10   0    4.90    1.80
  -5  10   0    5.20    1.80
   5  10   0    4.40    2.30
   6 -10   0   52.69    4.40
  -6  10   0   53.49    3.90
   6  10   0   51.39    4.80
   6  10   0   55.19    4.00
   7 -10   0    3.50    2.10
   7  10   0    8.50    2.00
   7  10   0    6.90    2.30
  -7  10   0    5.10    1.80
   8 -10   0   68.59    5.00
  -8  10   0   64.99    4.30
   8  10   0   65.09    5.30
   8  10   0   64.49    4.50
   9 -10   0   10.00    2.40
  -9  10   0   12.90    2.20
   9  10   0   11.20    2.10
   9  10   0   11.00    2.90
 -10 -10   0    9.30    2.70
  10 -10   0   11.10    2.40
 -10  10   0   13.70    2.20
  10  10   0   15.50    2.40
  10  10   0   16.90    3.10
  11 -10   0    9.90    2.30
 -11 -10   0    3.50    3.60
 -11  10   0   12.10    2.10
  11  10   0    9.40    2.70
 -12 -10   0    9.60    2.80
  12 -10   0   13.70    2.50
 -12  10   0   20.00    3.10
  12  10   0   22.70    3.60
  13 -10   0    1.20    2.20
 -13  10   0   -0.90    1.80
  13  10   0    0.20    2.70
 -14 -10   0   -5.80    2.70
  14 -10   0   -2.00    2.30
 -14  10   0    1.00    2.00
  14  10   0   -2.30    2.60
 -15 -10   0    4.50    3.20
  15 -10   0    3.70    2.60
  15  10   0    6.40    2.90
 -15  10   0    4.20    2.40
 -16 -10   0    2.80    3.10
  16 -10   0    5.30    2.90
 -16  10   0    5.30    2.20
  16  10   0    3.50    3.10
 -17 -10   0   -1.70    3.00
  17 -10   0    0.60    2.90
  17  10   0    2.20    3.40
 -17  10   0    1.60    2.40
 -18 -10   0   -2.40    3.10
  18 -10   0   -1.50    2.70
  18  10   0   -3.60    3.20
 -18  10   0   -6.40    2.80
  19 -10   0    3.50    3.20
 -19 -10   0   -5.20    3.10
  19  10   0   -0.70    4.50
 -19  10   0    5.80    2.80
 -20 -10   0   -2.30    3.20
  20 -10   0   -2.40    3.10
  20  10   0   -5.00    3.70
   0 -11   0    0.60    2.30
   0  11   0    2.20    1.70
   1 -11   0   -1.40    2.20
  -1 -11   0   -2.00    2.30
  -1  11   0    0.70    1.80
   1  11   0    0.80    1.70
   2 -11   0   16.90    2.90
  -2 -11   0   19.90    3.10
   2  11   0   21.90    3.00
  -2  11   0   21.30    2.70
   3 -11   0   -0.50    2.20
  -3 -11   0   -0.70    2.30
  -3  11   0   -0.70    1.60
   3  11   0    1.30    1.70
   4 -11   0   -0.50    2.30
   4  11   0    1.30    1.80
  -4  11   0    0.50    1.60
   5 -11   0   10.00    2.60
   5  11   0    8.90    2.20
  -5  11   0    7.90    1.90
   6 -11   0    4.30    2.30
   6  11   0    5.50    2.80
  -6  11   0    2.20    1.70
   6  11   0    4.90    1.90
   7 -11   0    8.30    2.40
   7  11   0   10.10    2.90
   7  11   0   12.40    2.40
  -7  11   0    9.30    2.10
   8 -11   0    3.80    2.20
   8  11   0   11.40    2.40
   8  11   0    4.80    2.60
  -8  11   0    5.00    2.00
   9 -11   0    1.00    2.10
   9  11   0   -1.20    2.60
   9  11   0    5.00    2.20
  -9  11   0    0.40    1.80
  10 -11   0    5.20    2.30
  10  11   0   10.50    3.20
 -10  11   0   10.10    2.30
  10  11   0    9.10    2.40
  11 -11   0   82.69    5.90
 -11  11   0   85.19    5.40
  11  11   0   81.79    6.40
  12 -11   0   -2.10    2.30
 -12  11   0   -0.40    2.00
  12  11   0   -1.70    3.10
  13 -11   0    4.50    2.70
 -13 -11   0   -2.80    3.00
 -13  11   0    2.00    2.10
  13  11   0   -0.60    2.90
  14 -11   0    3.10    2.90
 -14 -11   0   -6.90    2.90
 -14  11   0   -1.40    2.10
  14  11   0    2.40    3.10
  15 -11   0   51.19    5.10
  15  11   0   43.90    5.80
 -15  11   0   52.69    4.60
  16 -11   0   -2.20    2.60
  16  11   0    0.30    3.10
 -16  11   0    4.60    2.30
  17 -11   0   75.19    6.10
 -17  11   0   76.89    6.00
  18 -11   0    5.70    3.40
  18  11   0    3.90    3.50
 -18  11   0    5.30    2.70
   0 -12   0   76.99    5.80
   0  12   0   76.19    4.90
  -1 -12   0   51.99    5.00
   1 -12   0   51.49    5.00
   1  12   0   55.09    4.10
  -1  12   0   55.79    4.20
  -2 -12   0    1.40    2.50
   2 -12   0    2.20    2.50
  -2  12   0    2.00    1.90
   2  12   0    2.80    1.90
   3 -12   0   -0.40    2.40
  -3 -12   0    0.90    2.40
   3  12   0    0.70    2.00
  -3  12   0   -0.20    1.80
  -4 -12   0   45.80    4.90
   4 -12   0   49.90    4.70
   4  12   0   56.19    4.40
  -4  12   0   46.10    3.70
   5 -12   0   60.09    5.10
  -5 -12   0   51.89    5.40
   5  12   0   70.89    4.70
  -5  12   0   57.09    4.30
   6 -12   0   26.20    4.00
   6  12   0   32.70    3.80
  -6  12   0   27.80    3.30
   7 -12   0   -0.60    2.40
  -7  12   0    1.00    1.80
   7  12   0   -0.80    2.20
   8 -12   0    1.40    2.60
  -8  12   0    1.00    1.80
   8  12   0   -2.10    3.00
   8  12   0    5.00    2.40
   9 -12   0    0.90    2.50
   9  12   0   -2.60    3.00
   9  12   0    0.70    2.40
  -9  12   0    0.70    2.00
  10 -12   0    7.90    2.70
 -10  12   0    4.00    2.10
  10  12   0    6.40    3.10
  10  12   0    8.10    3.00
  11 -12   0  115.49    7.30
  11  12   0  123.29    8.10
 -11  12   0  122.89    7.10
  12 -12   0   -0.50    2.40
  12  12   0    2.60    3.20
 -12  12   0    4.30    2.40
  13 -12   0   28.80    4.50
 -13  12   0   29.90    4.00
  13  12   0   34.20    5.30
  14 -12   0    4.20    3.10
  14  12   0    3.20    3.70
 -14  12   0    2.60    2.50
  15 -12   0    4.70    3.00
  15  12   0    5.90    5.50
 -15  12   0    1.80    2.80
  16 -12   0    1.30    2.90
  16  12   0    1.60    3.60
 -16  12   0   -5.00    2.50
   0 -13   0   -1.10    2.70
   0  13   0    0.50    2.00
  -1 -13   0   -0.10    2.70
   1 -13   0    1.00    2.50
  -1  13   0   -0.70    1.80
   1  13   0   -0.30    2.20
  -2 -13   0    5.40    2.90
   2 -13   0    6.60    2.80
  -2  13   0    7.90    2.20
   2  13   0    5.50    2.60
   3 -13   0    1.00    2.60
  -3 -13   0   -2.40    2.70
  -3  13   0    1.30    1.90
   3  13   0    3.20    2.30
  -4 -13   0    0.90    2.80
   4 -13   0   -1.10    2.30
  -4  13   0    0.00    2.00
   4  13   0    1.20    2.20
  -5 -13   0    2.50    2.70
   5 -13   0    8.30    2.90
  -5  13   0    9.80    2.50
   5  13   0   11.70    2.70
  -6 -13   0    2.00    2.70
   6 -13   0    4.10    2.70
   6  13   0    7.50    2.70
  -6  13   0    7.20    2.30
   7 -13   0    3.30    2.50
   7  13   0    7.80    2.80
  -7  13   0    6.10    2.40
   8 -13   0   19.60    3.30
  -8  13   0   16.10    2.60
   8  13   0   19.20    3.20
   9 -13   0   26.20    3.70
   9  13   0   27.70    3.90
  -9  13   0   26.60    3.80
  10 -13   0    9.00    2.80
  10  13   0    9.50    3.50
 -10  13   0    9.20    2.50
  11 -13   0    6.60    2.90
 -11  13   0   10.30    2.60
  11  13   0   12.60    3.70
  12 -13   0   17.30    3.50
 -12  13   0    8.40    4.20
  13 -13   0    3.00    2.60
  13  13   0   -2.10    3.70
 -13  13   0    1.80    2.60
   0 -14   0    2.00    2.90
   0  14   0    4.00    2.60
   1 -14   0   -2.60    2.70
  -1 -14   0    1.20    2.70
   1  14   0    2.10    2.40
  -1  14   0    0.90    2.40
  -2 -14   0   -1.90    2.80
   2 -14   0   -1.00    2.60
   2  14   0    0.70    2.60
  -2  14   0   -3.40    2.40
   3 -14   0    9.80    3.30
  -3 -14   0    7.30    3.40
  -3  14   0    9.90    2.60
   3  14   0    8.50    2.80
   4 -14   0    0.50    2.70
  -4 -14   0    4.50    3.20
  -4  14   0    1.60    2.40
   4  14   0    1.30    2.50
  -5 -14   0   16.00    3.60
   5 -14   0   12.90    3.20
  -5  14   0   13.40    2.80
   5  14   0   17.40    3.20
   6 -14   0    1.60    2.70
  -6 -14   0    3.10    3.10
   6  14   0    3.00    2.60
  -6  14   0    2.70    2.50
  -7 -14   0    8.00    4.70
  -7  14   0   10.90    3.90
   7  14   0    9.90    2.90
  -8 -14   0    3.70    3.30
   8 -14   0    2.60    2.50
   8  14   0   -0.70    3.00
  -8  14   0    6.90    2.60
  -9 -14   0   27.10    4.20
   9 -14   0   33.60    4.60
  -9  14   0   17.40    3.10
  10 -14   0    3.80    2.90
 -10  14   0    2.30    2.80
   0 -15   0    2.50    2.90
   0  15   0    2.50    2.60
  -1 -15   0   -2.70    2.80
   1 -15   0   -4.80    2.90
  -1  15   0    0.40    2.60
   1  15   0   -2.60    2.50
   2 -15   0    6.50    3.30
  -2 -15   0   -1.00    2.80
  -2  15   0    2.20    2.40
   2  15   0    2.80    2.50
  -3 -15   0   -1.20    2.80
   3 -15   0    3.00    3.10
   3  15   0    9.90    2.80
  -3  15   0    4.90    2.50
  -4 -15   0   -3.30    3.10
  -4  15   0    3.60    2.50
   4  15   0    5.10    3.00
  26   0  -1    3.70    2.80
 -25   0   1   12.50    3.10
  25   0  -1   19.80    3.30
 -24   0   1   -0.60    2.40
  24   0  -1   -2.40    2.20
 -23   0   1    7.10    2.40
  23   0  -1   13.20    2.60
  22   0  -1    1.00    2.10
 -22   0   1    0.30    2.10
 -21   0   1   34.50    3.70
  21   0  -1   29.50    3.60
  20   0  -1    0.40    1.80
 -20   0   1    2.50    1.90
  19   0  -1  121.59    6.70
 -19   0   1  114.89    6.70
  18   0  -1    5.00    1.70
 -18   0   1    1.80    1.80
  17   0  -1  225.38   11.70
 -17   0   1  241.48   11.60
 -16   0   1   -0.10    1.60
  16   0  -1   -0.40    1.50
  15   0  -1   96.79    5.50
 -15   0   1  102.99    5.70
 -14   0   1   -1.20    1.40
  14   0  -1   -0.70    1.40
  13   0  -1  293.17   14.40
 -13   0   1  314.57   14.50
 -12   0   1   -0.60    1.10
  12   0  -1    0.50    1.10
 -11   0   1  786.52   36.30
  11   0  -1  801.02   36.20
  10   0  -1   -0.60    1.00
 -10   0   1   -0.20    0.30
 -10   0   1   -1.00    1.00
  -9   0   1  283.87   13.30
   9   0  -1  300.47   13.40
  -9   0   1  267.17   12.80
  -8   0   1    0.40    0.30
   8   0  -1   -0.30    0.90
  -8   0   1   -1.10    0.90
  -7   0   1   69.09    3.80
   7   0  -1   69.19    3.70
  -7   0   1   72.29    3.20
  -6   0   1    0.20    0.30
  -6   0   1   -1.60    0.70
   6   0  -1    0.40    0.80
   5   0  -1  481.15   21.50
  -5   0   1  467.65   21.50
  -5   0   1  468.15   21.20
  -4   0   1   -1.00    0.70
   4   0  -1   -0.60    0.70
  -4   0   1   -0.10    0.20
   3   0  -1  439.06   19.30
  -3   0   1  415.86   19.30
   2   0  -1    0.50    0.30
  -2   0   1    0.20    0.30
  -2   0   1    0.60    0.10
   2   0   1    0.20    0.50
   2   0   1    0.70    0.30
  -2   0  -1    0.80    0.20
   3   0   1   26.70    1.90
  -3   0  -1   28.60    1.40
   3   0   1   28.90    1.60
   4   0   1    0.50    0.60
  -4   0  -1    1.00    0.40
   4   0   1    1.50    0.90
   5   0   1 1003.50   46.10
   5   0   1 1074.59   46.00
  -5   0  -1  975.40   45.70
  -6   0  -1    0.40    0.40
   6   0   1    0.60    0.70
   6   0   1    1.10    0.90
  -7   0  -1  418.86   18.50
   7   0   1  358.66   19.10
   7   0   1  452.65   18.90
  -8   0  -1    0.50    0.40
   8   0   1    0.90    0.90
  -9   0  -1  326.47   14.90
   9   0   1  328.97   15.20
 -10   0  -1    0.50    0.50
  10   0   1    1.00    1.00
 -11   0  -1    8.90    1.70
 -11   0  -1   12.90    0.90
  11   0   1   11.70    1.60
  12   0   1    0.30    1.20
 -12   0  -1    0.90    0.50
 -12   0  -1   -1.40    1.40
 -13   0  -1  451.95   20.90
  13   0   1  440.26   20.70
  14   0   1    0.70    1.50
 -14   0  -1    2.30    1.70
  15   0   1  274.07   13.50
 -15   0  -1  289.37   13.80
 -16   0  -1   -0.80    1.70
  16   0   1    0.60    1.60
 -17   0  -1  501.85   23.50
  17   0   1  493.45   23.30
  18   0   1    1.10    1.80
 -18   0  -1    0.60    1.80
 -19   0  -1   94.19    6.20
  19   0   1  102.99    5.90
  20   0   1    0.10    1.80
 -20   0  -1    0.20    2.00
  21   0   1   30.30    3.70
 -21   0  -1   29.00    3.90
  22   0   1    2.70    2.20
 -22   0  -1   -1.10    2.10
  23   0   1    6.40    2.40
 -23   0  -1    8.70    2.70
 -24   0  -1    1.10    2.40
  24   0   1   -2.30    2.40
  25   0   1    4.60    2.60
 -25   0  -1    2.40    2.70
 -26   0  -1   -1.60    2.60
  26   0   1    2.80    3.00
 -26  -1   1   32.50    4.70
  26  -1  -1   34.00    4.30
  26   1  -1   37.00    4.50
 -26   1   1   24.30    4.60
  25  -1  -1    8.60    3.00
 -25  -1   1    7.50    2.70
 -25   1   1    2.30    2.70
  25   1  -1   10.40    3.00
  24  -1  -1   16.90    2.90
 -24  -1   1   14.20    3.00
  24   1  -1   13.80    2.80
 -24   1   1   13.90    3.10
 -23  -1   1    0.30    2.30
  23  -1  -1    1.40    2.20
  23   1  -1    5.00    2.40
 -23   1   1    1.60    2.50
 -22  -1   1   35.40    4.00
  22  -1  -1   42.00    4.00
  22   1  -1   38.90    4.00
 -22   1   1   33.00    3.80
  21  -1  -1    8.40    2.30
 -21  -1   1    5.20    2.20
  21   1  -1    7.50    2.20
 -21   1   1    5.60    2.30
  20  -1  -1    1.60    1.80
 -20  -1   1    2.30    2.00
  20   1  -1    1.00    1.80
 -20   1   1    0.80    1.90
 -19  -1   1   82.69    5.50
  19  -1  -1   87.59    5.30
  19   1  -1   83.69    5.20
 -19   1   1   87.49    5.30
 -18  -1   1    6.60    2.00
  18  -1  -1    7.80    2.00
  18   1  -1    7.50    1.90
 -18   1   1    6.70    1.90
  17  -1  -1   45.90    3.70
 -17  -1   1   46.60    4.30
 -17   1   1   50.39    3.80
  17   1  -1   44.50    3.70
 -16  -1   1    2.60    1.70
  16  -1  -1    4.90    1.70
  16   1  -1    2.70    1.60
 -16   1   1    5.00    1.70
  15  -1  -1   -3.00    1.40
 -15  -1   1   -1.50    1.50
 -15   1   1   -1.40    1.40
  15   1  -1   -1.10    1.40
  14  -1  -1    3.90    1.60
 -14  -1   1    4.10    1.80
 -14   1   1    4.50    1.50
  14   1  -1    5.00    1.40
 -14   1   1    6.00    0.90
  13  -1  -1   45.00    3.30
 -13  -1   1   47.30    3.50
  13   1  -1   47.90    3.30
 -13   1   1   48.60    2.50
 -13   1   1   49.00    3.30
 -12  -1   1    4.60    1.50
  12  -1  -1    5.10    1.40
 -12   1   1    7.20    0.90
  12   1  -1   10.30    1.60
 -12   1   1    4.90    1.30
  11  -1  -1  139.29    7.10
 -11  -1   1  147.79    7.30
 -11   1   1  140.29    7.10
  11   1  -1  135.69    7.00
 -11   1   1  146.39    6.60
  10  -1  -1    0.40    1.00
 -10  -1   1   -0.40    1.10
  10   1  -1    1.10    1.00
 -10   1   1    0.50    0.50
 -10   1   1    0.20    0.90
   9  -1  -1  227.38   11.70
  -9   1   1  233.98   11.10
  -9   1   1  242.38   10.80
  -8  -1   1 1532.85   68.19
   8  -1  -1 1484.15   68.09
  -8   1   1 1506.85   68.09
   8   1  -1 1471.25   68.09
  -8   1   1 1550.64   67.89
   7  -1  -1  279.77   13.50
  -7  -1   1  288.77   13.70
  -7   1   1  292.97   13.40
   7   1  -1  265.37   13.50
  -7   1   1  317.87   13.20
  -6  -1   1 1244.18   56.39
   6  -1  -1 1262.97   56.39
   6   1  -1 1240.68   56.39
  -6   1   1 1249.18   56.29
   5  -1  -1  291.47   13.40
  -5  -1   1  299.17   13.60
  -5   1   1  293.97   13.40
   5   1  -1  285.47   13.50
  -5   1   1  296.77   13.30
   4  -1  -1 7943.51  394.26
  -4  -1   1 9412.76  392.06
   4  -1  -1 8388.36  393.76
  -4  -1   1 8976.00  391.16
  -4   1   1 8373.76  394.06
   4   1  -1 8885.81  391.56
  -4   1   1 8224.58  394.36
   3  -1  -1 1246.98   56.09
   2  -1  -1 2100.39  106.39
  -2  -1   1 2424.26  104.99
  -2  -1   1 2367.46  104.79
   2  -1  -1 2142.29  106.39
   2   1  -1 2456.45  104.59
  -2   1   1 2085.59  106.19
   1  -1  -1  888.41   40.00
   0  -1  -1 1505.05   70.79
   0  -1  -1 1640.14   69.79
   0  -1  -1 1564.44   70.69
   0  -1   1 1477.45   73.29
   0  -1   1 1425.56   72.99
   0   1  -1 1501.25   73.09
   0   1   1 1567.14   70.79
   0   1   1 1652.23   70.89
   1  -1   1  687.43   32.00
   1   1   1  734.93   32.10
   2  -1   1  180.58    8.20
   2  -1   1  172.88    8.20
   2   1   1  177.88    8.40
   2   1   1  174.38    8.10
   2   1   1  185.28    8.20
  -2   1  -1  182.18    8.20
   3  -1   1  556.74   25.30
   3  -1   1  567.54   25.40
   3   1   1  565.74   25.50
   3   1   1  549.15   25.20
  -3   1  -1  557.64   25.30
   3   1   1  562.24   25.30
   4  -1   1 1188.18   53.79
   4  -1   1 1189.38   53.89
   4   1   1 1190.28   53.99
  -4   1  -1 1206.18   53.69
   5  -1   1    3.00    0.80
   5  -1   1    1.90    0.80
  -5  -1  -1    1.10    0.30
   5   1   1    1.30    0.90
  -5   1  -1    1.40    0.60
   5   1   1    2.70    0.70
   6  -1   1   41.30    2.30
  -6  -1  -1   35.90    1.90
   6   1   1   38.20    2.30
   6   1   1   41.60    2.60
  -6   1  -1   40.00    2.10
   7  -1   1  228.88   10.40
  -7  -1  -1  205.48   10.00
  -7   1  -1  227.68   10.20
   7   1   1  218.08   10.60
   7   1   1  228.98   10.40
  -8  -1  -1    9.90    0.70
   8  -1   1   14.70    1.60
   8   1   1   15.20    2.00
   8   1   1   11.10    1.50
  -8   1  -1   11.30    1.10
   9  -1   1   45.70    2.80
  -9   1  -1   48.90    2.50
  -9   1  -1   45.20    3.20
   9   1   1   48.20    2.90
  10  -1   1   20.30    2.00
 -10   1  -1   20.80    2.30
 -10   1  -1   21.80    1.50
  10   1   1   20.20    1.90
 -11  -1  -1   11.00    2.10
  11  -1   1   10.00    1.60
 -11   1  -1    8.10    1.60
  11   1   1   10.90    1.80
 -11   1  -1    9.30    1.10
  12  -1   1   19.70    2.30
 -12  -1  -1   14.30    2.80
  12   1   1   19.20    2.10
 -12   1  -1   15.70    2.50
 -12   1  -1   21.80    1.50
 -13  -1  -1  141.89    7.70
  13  -1   1  136.59    7.30
 -13   1  -1  145.39    7.50
  13   1   1  141.59    7.30
 -13   1  -1  150.18    6.80
 -14  -1  -1  135.09    7.40
  14  -1   1  136.99    7.10
 -14   1  -1  141.29    6.40
 -14   1  -1  131.89    7.20
  14   1   1  130.49    7.00
 -15  -1  -1    1.40    1.80
  15  -1   1    0.30    1.60
  15   1   1    0.40    1.40
 -15   1  -1    1.30    1.60
  16  -1   1    0.10    1.60
 -16  -1  -1    1.10    1.80
  16   1   1    1.20    1.60
 -16   1  -1   -1.00    1.60
  17  -1   1   -0.50    1.60
 -17  -1  -1   -2.40    1.80
  17   1   1   -0.60    1.60
 -17   1  -1    0.00    2.00
 -18  -1  -1   79.09    5.60
  18  -1   1   87.99    5.30
  18   1   1   94.99    5.30
 -18   1  -1   83.29    5.50
 -19  -1  -1   37.20    4.00
  19  -1   1   42.60    3.80
  19   1   1   42.50    3.60
 -19   1  -1   42.40    3.90
 -20  -1  -1   23.50    3.70
  20  -1   1   26.90    3.40
  20   1   1   28.60    3.40
 -20   1  -1   22.70    3.60
 -21  -1  -1   23.70    3.90
  21  -1   1   27.60    3.60
  21   1   1   28.90    3.50
 -21   1  -1   22.60    3.80
 -22  -1  -1   13.60    2.70
  22  -1   1   15.20    2.60
 -22   1  -1   11.50    2.70
  22   1   1   10.10    2.40
  23  -1   1   18.20    3.00
 -23  -1  -1   13.10    2.90
  23   1   1   12.30    2.60
 -23   1  -1    9.50    2.70
 -24  -1  -1    1.80    2.50
  24  -1   1    3.70    2.50
 -24   1  -1    3.40    2.60
  24   1   1    8.10    2.80
 -25  -1  -1    7.80    2.70
  25  -1   1    4.10    2.60
  25   1   1    8.90    2.70
 -25   1  -1    5.20    2.70
  26  -1   1   18.40    3.30
 -26  -1  -1   14.10    3.30
  26   1   1   18.30    3.50
 -26  -2   1    0.90    2.80
  26  -2  -1    1.10    2.90
 -26   2   1   -3.30    2.80
  26   2  -1    4.10    2.90
  25  -2  -1    9.90    2.90
 -25  -2   1   10.80    3.00
  25   2  -1    6.40    2.80
 -25   2   1    2.80    2.70
  24  -2  -1    8.00    2.60
 -24  -2   1    4.10    2.50
 -24   2   1    5.10    2.50
  24   2  -1    6.40    2.70
 -23  -2   1    3.10    2.40
  23  -2  -1    2.70    2.30
  23   2  -1    3.70    2.40
 -23   2   1    1.60    2.40
  22  -2  -1   15.10    2.60
 -22  -2   1   24.00    3.90
  22   2  -1   20.30    3.00
 -22   2   1   15.00    2.70
 -21  -2   1    1.60    2.10
  21  -2  -1    1.40    2.10
  21   2  -1   -0.20    2.10
 -21   2   1    3.30    2.10
 -20  -2   1   89.89    5.90
  20  -2  -1   91.69    5.70
  20   2  -1   93.29    5.70
 -20   2   1   83.89    5.60
 -19  -2   1   25.40    3.40
  19  -2  -1   28.20    3.40
 -19   2   1   24.80    3.30
  19   2  -1   33.20    3.40
 -18  -2   1    6.30    2.10
  18  -2  -1   11.50    2.30
 -18   2   1    9.60    2.10
  18   2  -1   13.60    2.20
 -17  -2   1    0.90    1.80
  17  -2  -1    1.20    1.80
 -17   2   1    1.70    1.60
  17   2  -1    2.40    1.60
 -16  -2   1   18.60    3.00
  16  -2  -1   19.20    2.80
  16   2  -1   19.20    2.70
 -16   2   1   19.40    2.60
 -15  -2   1    4.30    1.80
  15  -2  -1    8.80    1.80
  15   2  -1    5.20    1.60
 -15   2   1    7.30    1.10
 -15   2   1    7.60    1.60
 -14  -2   1  291.07   14.00
  14  -2  -1  272.07   13.80
 -14   2   1  301.77   13.40
 -14   2   1  288.67   13.80
  14   2  -1  291.97   13.80
 -13  -2   1   33.20    3.20
  13  -2  -1   36.70    3.00
 -13   2   1   37.10    2.30
  13   2  -1   33.20    2.90
 -13   2   1   38.70    2.80
  12  -2  -1  235.28   11.10
 -12  -2   1  221.68   11.30
  12   2  -1  225.28   11.10
 -12   2   1  227.88   11.00
 -12   2   1  243.08   10.70
 -11  -2   1   91.89    5.30
  11  -2  -1   95.59    5.10
  11   2  -1   91.49    5.10
 -11   2   1  101.99    4.70
 -11   2   1   90.49    4.90
  10  -2  -1  629.04   29.40
 -10  -2   1  656.93   29.50
 -10   2   1  636.94   29.30
  10   2  -1  636.74   29.40
 -10   2   1  651.03   29.10
  -9  -2   1    4.30    1.40
   9  -2  -1    5.10    1.20
   9   2  -1    4.40    1.10
  -9   2   1    3.90    0.80
  -9   2   1    6.80    1.30
   8  -2  -1 2131.79   96.19
  -8  -2   1 2194.88   96.39
   8   2  -1 2075.39   96.19
  -8   2   1 2141.19   96.19
  -7  -2   1  248.38   11.80
   7  -2  -1  241.18   11.50
  -7   2   1  259.87   11.40
   7   2  -1  241.98   11.60
  -7   2   1  250.87   11.50
   7   2  -1  244.38   11.20
  -6  -2   1 1775.62   76.49
   6  -2  -1 1671.63   76.39
   6   2  -1 1638.34   76.39
   5  -2  -1    3.10    0.90
  -5   2   1    3.10    0.70
  -5   2   1    2.90    0.60
   5   2  -1    3.40    0.40
   5   2  -1    4.10    0.80
   4  -2  -1  661.53   30.00
   4   2  -1  662.63   29.90
   4   2  -1  645.74   30.00
  -4   2   1  683.83   29.90
  -4   2   1  661.73   30.00
   3  -2  -1   97.29    4.90
  -3   2   1   97.69    4.70
   3   2  -1  101.09    4.90
  -3   2   1  108.09    4.80
   3   2  -1  101.09    4.70
  -2  -2   1  257.47   11.90
   2  -2  -1  268.67   12.00
  -2   2   1  258.07   11.90
   2   2  -1  260.87   11.90
  -2   2   1  264.37   11.80
   2   2  -1  253.17   12.00
   1  -2  -1   43.30    2.30
  -1  -2   1   43.50    2.10
  -1   2   1   41.50    2.20
   1   2  -1   46.10    2.40
   1   2  -1   42.70    2.20
  -1   2   1   39.80    2.20
   0   2   1  991.60   44.40
   0   2  -1  960.10   44.40
   0   2   1 1000.00   44.30
   1  -2   1  946.91   41.90
   1   2   1  903.71   41.90
   1   2   1  933.51   41.90
   2  -2   1   25.40    1.80
  -2   2  -1   25.90    1.70
   2   2   1   31.40    1.90
   2   2   1   25.70    1.50
   2   2   1   23.70    1.70
   3  -2   1  290.67   13.30
  -3   2  -1  285.47   13.20
   3   2   1  288.37   13.20
   3   2   1  288.37   13.10
   3   2   1  292.47   13.40
   4  -2   1    7.00    1.00
   4   2   1   10.10    1.50
   4   2   1    7.50    1.00
   4   2   1    6.70    0.70
  -4   2  -1    7.00    0.90
   5  -2   1  283.47   13.00
   5   2   1  280.37   13.20
  -5   2  -1  285.87   12.90
   5   2   1  279.57   13.00
   5   2   1  277.87   12.80
   6  -2   1  539.85   25.30
  -6   2  -1  549.25   25.20
   6   2   1  576.54   25.00
  -6   2  -1  552.34   25.20
   7  -2   1    1.60    0.90
  -7   2  -1    1.80    0.80
  -7   2  -1   -0.40    0.90
   7   2   1    1.90    1.10
   7   2   1    1.60    0.90
  -8  -2  -1  194.18    9.00
   8   2   1  197.28    9.40
  -8   2  -1  208.68    9.20
  -8   2  -1  190.88    9.50
   9  -2   1  268.97   12.50
  -9  -2  -1  231.38   12.00
   9   2   1  269.47   12.50
  -9   2  -1  285.47   12.30
  -9   2  -1  272.87   12.50
  10  -2   1   63.39    3.70
  10   2   1   61.69    3.60
 -10   2  -1   66.19    3.30
 -10   2  -1   60.09    3.80
  11  -2   1   71.09    4.00
 -11   2  -1   67.39    3.60
 -11   2  -1   67.89    4.00
  11   2   1   65.19    3.90
  12  -2   1  170.18    8.10
 -12  -2  -1  167.68    8.60
 -12   2  -1  165.38    8.10
  12   2   1  163.98    8.10
 -12   2  -1  145.59    7.90
 -13  -2  -1   17.00    3.10
  13  -2   1   23.40    2.60
 -13   2  -1   24.00    2.60
  13   2   1   25.30    2.50
 -14  -2  -1  223.48   11.10
  14  -2   1  217.28   10.80
  14   2   1  215.28   10.70
 -14   2  -1  219.78   10.80
 -15  -2  -1   25.70    3.50
  15  -2   1   27.70    3.00
 -15   2  -1   23.80    2.90
  15   2   1   32.50    2.90
 -16   2  -1    2.70    1.60
  16   2   1    3.70    1.70
 -17  -2  -1   26.70    3.60
  17  -2   1   31.90    3.30
  17   2   1   24.10    3.10
 -17   2  -1   32.90    3.30
  18  -2   1   95.99    5.90
 -18  -2  -1   97.29    6.00
  18   2   1  101.29    5.90
 -18   2  -1   98.39    5.90
 -19  -2  -1   10.50    2.40
  19  -2   1   12.90    2.40
  19   2   1   16.40    2.50
 -19   2  -1   16.90    3.20
  20  -2   1   15.80    2.60
 -20  -2  -1   12.90    2.70
 -20   2  -1   11.30    2.50
  20   2   1   16.90    2.70
  21  -2   1    6.10    2.40
 -21  -2  -1    5.40    2.40
 -21   2  -1    3.90    2.20
  21   2   1    9.10    2.50
 -22  -2  -1   27.50    4.20
  22  -2   1   30.20    3.80
  22   2   1   32.10    3.90
 -22   2  -1   20.60    3.80
 -23  -2  -1   11.90    2.80
  23  -2   1   15.40    2.90
  23   2   1   10.80    2.60
 -23   2  -1   11.50    2.80
 -24  -2  -1    8.40    2.80
  24  -2   1   11.50    2.90
  24   2   1    8.90    2.70
 -24   2  -1    5.80    2.90
  25   2   1   -3.00    3.30
 -25   2  -1   -5.10    2.50
 -26  -2  -1    2.60    2.70
  26  -2   1    3.50    2.80
  26   2   1    1.90    3.00
 -26   2  -1   -3.90    2.60
  26  -3  -1   -1.10    2.80
 -26  -3   1   -1.80    2.70
 -26   3   1   -3.20    2.80
  26   3  -1   -3.10    3.20
  25  -3  -1   12.20    3.20
 -25  -3   1    7.30    2.90
  25   3  -1    9.80    3.20
 -25   3   1    5.00    2.90
  24  -3  -1   24.10    3.30
 -24  -3   1   17.20    3.10
  24   3  -1   19.50    3.30
  23  -3  -1   11.90    2.80
 -23  -3   1    3.20    2.50
  23   3  -1    9.00    2.80
 -23   3   1    3.60    2.60
  22  -3  -1    2.70    2.40
 -22  -3   1    6.50    2.50
  22   3  -1    3.40    2.50
 -22   3   1    1.40    2.20
 -21  -3   1   45.70    4.60
  21  -3  -1   60.29    4.40
 -21   3   1   41.90    4.40
 -20  -3   1   23.10    3.40
  20  -3  -1   12.30    2.40
  20   3  -1   22.40    3.50
 -20   3   1   19.60    3.30
 -19  -3   1   32.30    3.90
  19  -3  -1   40.10    3.80
 -19   3   1   38.00    3.70
  19   3  -1   40.40    3.80
 -18  -3   1    8.30    2.30
  18  -3  -1    8.70    2.10
 -18   3   1   10.60    3.20
  18   3  -1   10.70    2.30
 -17  -3   1   29.30    3.50
  17  -3  -1   30.50    3.40
 -17   3   1   30.20    3.00
  17   3  -1   31.80    3.30
 -16  -3   1    1.10    2.60
 -16   3   1    1.90    1.50
  15  -3  -1    5.40    1.80
 -15  -3   1    4.20    1.90
  15   3  -1    3.80    1.60
 -15   3   1    4.80    1.40
  14  -3  -1   25.20    2.80
 -14  -3   1   21.90    3.20
  14   3  -1   24.60    2.80
 -14   3   1   28.10    2.20
 -14   3   1   33.20    2.70
 -13  -3   1    4.30    1.80
  13  -3  -1   10.60    1.90
 -13   3   1    9.10    1.50
 -13   3   1    7.90    1.30
  13   3  -1    5.40    1.50
  12  -3  -1   77.09    4.50
 -12  -3   1   72.09    4.70
 -12   3   1   78.69    4.40
  12   3  -1   71.09    4.40
 -12   3   1   76.09    4.00
  11  -3  -1   18.60    2.30
 -11  -3   1   15.70    2.20
  11   3  -1   19.20    2.20
 -11   3   1   22.40    1.80
 -11   3   1   19.30    1.90
 -10  -3   1  128.19    6.80
  10  -3  -1  122.89    6.50
 -10   3   1  123.29    6.20
  10   3  -1  133.79    6.50
 -10   3   1  129.49    6.20
  -9  -3   1  524.15   24.10
   9  -3  -1  529.25   23.90
   9   3  -1  493.05   23.90
  -9   3   1  516.45   23.70
  -9   3   1  535.45   23.70
   9   3  -1  521.55   23.50
  -8  -3   1    0.00    2.00
   8  -3  -1    2.30    1.10
   8   3  -1    0.10    0.40
  -8   3   1    2.00    0.90
   8   3  -1    0.30    0.90
  -8   3   1    1.00    0.70
   7  -3  -1  484.05   22.00
  -7  -3   1  479.55   22.10
   7   3  -1  451.85   21.70
   7   3  -1  478.75   22.00
  -7   3   1  503.85   21.80
   6  -3  -1   40.80    2.60
   6   3  -1   41.60    2.10
  -6   3   1   37.10    2.10
   6   3  -1   40.50    2.50
  -6   3   1   37.20    2.30
   5  -3  -1   42.10    2.80
  -5   3   1   47.00    2.60
  -5   3   1   47.20    2.30
   5   3  -1   47.00    2.40
   5   3  -1   46.90    2.80
   4  -3  -1   33.10    2.20
  -4   3   1   32.10    1.70
   4   3  -1   35.00    1.90
   4   3  -1   38.90    2.30
  -4   3   1   32.10    2.10
   3  -3  -1  340.77   15.50
   3   3  -1  340.67   15.30
  -3   3   1  343.67   15.30
  -3   3   1  314.47   15.40
   3   3  -1  343.77   15.50
  -2  -3   1  165.18    7.80
   2  -3  -1  169.08    8.00
   2   3  -1  170.08    8.00
  -2   3   1  166.68    7.90
   2   3  -1  173.48    7.90
  -2   3   1  167.28    7.70
  -1  -3   1  489.45   21.70
   1  -3  -1  507.35   22.00
   1   3  -1  471.35   22.00
  -1   3   1  461.85   21.90
  -1   3   1  495.45   21.80
   1   3  -1  463.05   21.90
   0   3   1   -0.60    0.60
   0   3  -1    0.50    0.70
   0   3  -1    2.70    0.90
   0   3   1    0.80    0.60
   0   3   1    0.80    0.90
   1  -3   1  582.24   25.70
   1   3   1  554.54   25.50
   1   3   1  573.14   25.60
   1   3   1  567.44   25.60
  -1   3  -1  539.45   25.50
   2  -3   1   14.80    1.60
   2   3   1   10.10    1.30
   2   3   1   14.30    1.50
   2   3   1   13.70    1.10
  -2   3  -1   13.20    1.30
   3  -3   1   13.10    1.50
  -3   3  -1   11.60    0.70
  -3   3  -1   11.10    1.30
   3   3   1   10.70    1.00
   3   3   1   12.80    1.40
   3   3   1   11.30    1.50
   4  -3   1  471.35   23.70
   4   3   1  529.05   23.70
  -4   3  -1  510.55   23.60
   4   3   1  522.45   23.50
  -4   3  -1  538.55   23.40
   4   3   1  541.65   23.90
   5  -3   1   63.19    3.40
  -5   3  -1   62.49    3.10
  -5   3  -1   54.89    3.30
   5   3   1   68.39    3.70
   5   3   1   63.39    3.40
   5   3   1   63.79    3.10
   6  -3   1   93.59    4.70
   6   3   1   92.29    4.40
   6   3   1   93.59    4.70
   6   3   1   89.89    5.00
  -6   3  -1   91.49    4.50
   7  -3   1    1.30    1.80
   7   3   1    1.90    1.10
   7   3   1    2.40    0.50
  -7   3  -1    0.10    0.70
   7   3   1    1.50    0.90
  -7   3  -1    0.00    0.80
   8  -3   1   33.80    2.50
   8   3   1   33.70    2.40
  -8   3  -1   32.20    2.20
  -8   3  -1   30.90    2.20
   8   3   1   35.70    1.80
   8   3   1   34.60    2.80
   9  -3   1   62.69    3.80
   9   3   1   69.59    3.90
  -9   3  -1   69.29    3.70
  -9   3  -1   66.49    3.60
  10  -3   1   52.79    3.30
 -10  -3  -1   49.90    2.50
 -10   3  -1   48.90    3.00
 -10   3  -1   48.90    3.10
  10   3   1   55.69    3.30
  11  -3   1  178.18    8.90
 -11   3  -1  179.28    8.70
  11   3   1  186.48    9.00
 -11   3  -1  180.08    8.80
 -12  -3  -1   -2.40    1.80
  12  -3   1    1.00    1.30
 -12   3  -1   -0.30    1.10
  12   3   1    1.60    1.30
 -12   3  -1    2.80    1.10
  13  -3   1   19.00    2.60
 -13  -3  -1   16.40    2.60
  13   3   1   16.90    2.50
 -13   3  -1   18.80    2.30
 -14  -3  -1   95.39    6.20
  14  -3   1  100.29    5.70
 -14   3  -1  102.59    5.20
 -14   3  -1  101.99    5.50
  14   3   1   97.09    5.60
  15  -3   1    8.90    1.90
 -15  -3  -1    6.40    2.30
  15   3   1   12.30    2.10
 -15   3  -1    8.90    1.80
 -15   3  -1   14.90    2.00
  16  -3   1    6.40    2.10
 -16  -3  -1    1.40    2.00
 -16   3  -1    3.30    1.60
  16   3   1    2.00    1.70
  17  -3   1    0.00    1.70
 -17  -3  -1    0.00    2.00
  17   3   1    0.00    1.70
 -17   3  -1   -0.80    1.70
  18  -3   1   -1.30    1.80
 -18  -3  -1    0.80    2.10
  18   3   1    1.30    1.90
 -18   3  -1    3.60    2.00
  19  -3   1   92.59    5.60
 -19  -3  -1   74.69    5.80
 -19   3  -1   76.59    5.30
  19   3   1   94.59    5.60
  20  -3   1   -0.50    2.20
 -20  -3  -1    2.80    2.30
  20   3   1    0.10    2.10
 -20   3  -1   -2.10    1.90
 -21  -3  -1    5.50    2.40
  21  -3   1    9.20    2.50
 -21   3  -1    6.50    2.40
  21   3   1    6.70    2.50
  22  -3   1    2.10    2.50
 -22  -3  -1    0.20    2.30
  22   3   1   -2.40    2.40
 -22   3  -1   -3.50    2.20
 -23  -3  -1   25.80    4.00
  23  -3   1   26.10    4.00
  23   3   1   30.70    4.20
 -24  -3  -1    8.50    2.80
  24  -3   1    7.70    2.80
  24   3   1   11.30    3.10
 -24   3  -1    8.40    2.80
  25  -3   1   30.70    4.20
 -25  -3  -1   28.00    4.20
  25   3   1   22.40    5.40
 -25   3  -1   16.60    3.40
  25  -4  -1    2.80    2.80
 -25  -4   1    5.70    2.70
 -25   4   1   -0.10    2.80
  25   4  -1    2.10    3.30
 -24  -4   1    2.60    2.70
  24  -4  -1   -0.30    2.50
  24   4  -1    5.40    2.80
  23  -4  -1    8.90    2.60
 -23  -4   1    7.00    2.60
 -23   4   1    3.90    2.80
  23   4  -1   14.00    3.00
 -22  -4   1    9.20    2.70
  22  -4  -1    6.70    2.60
  22   4  -1    6.80    3.00
 -22   4   1    0.60    2.40
 -21  -4   1    9.50    2.60
  21  -4  -1   14.00    2.90
 -21   4   1    6.70    2.60
  21   4  -1   12.50    2.70
 -20  -4   1   53.89    4.60
  20  -4  -1   53.39    4.50
  20   4  -1   46.30    4.50
 -20   4   1   45.50    4.10
  19  -4  -1   -1.00    1.90
 -19  -4   1    1.90    2.10
 -19   4   1    0.70    1.90
  19   4  -1    0.90    2.00
  18  -4  -1   23.30    3.40
 -18  -4   1   13.40    2.50
 -18   4   1   14.50    2.90
  18   4  -1   22.80    3.40
 -17  -4   1   18.70    3.40
  17  -4  -1   14.90    2.40
 -17   4   1   17.50    2.90
  17   4  -1   22.90    3.30
 -16  -4   1  181.58    9.70
  16  -4  -1  190.38    9.60
 -16   4   1  183.88    9.30
 -16   4   1  193.28    9.20
  16   4  -1  183.58    9.60
  15  -4  -1  116.49    6.30
 -15  -4   1  107.39    6.60
  15   4  -1  114.49    6.50
 -15   4   1  110.69    6.10
 -15   4   1  122.69    6.00
 -14  -4   1  104.39    6.30
  14  -4  -1  108.59    5.90
  14   4  -1   98.19    5.90
 -14   4   1  108.29    5.60
 -14   4   1  106.79    5.60
 -13  -4   1   50.09    4.30
  13  -4  -1   57.89    3.90
 -13   4   1   58.89    3.40
 -13   4   1   55.19    3.50
  13   4  -1   62.69    4.10
 -12  -4   1  107.79    6.20
  12  -4  -1  107.99    5.90
 -12   4   1  108.59    5.50
 -12   4   1  106.29    5.50
  12   4  -1  110.39    6.00
  11  -4  -1  262.07   12.70
 -11  -4   1  261.67   12.80
 -11   4   1  271.77   12.50
  11   4  -1  263.47   12.70
  10  -4  -1  101.69    5.50
 -10  -4   1  105.39    5.70
 -10   4   1  102.49    5.00
 -10   4   1   95.69    5.10
  10   4  -1  100.29    4.80
  10   4  -1   97.49    5.40
  -9  -4   1   11.60    1.80
   9  -4  -1   10.80    1.70
   9   4  -1   11.60    1.90
  -9   4   1    9.40    1.50
   9   4  -1   11.50    1.00
  -9   4   1    9.90    1.80
  -8  -4   1   -0.30    1.20
   8  -4  -1   -0.90    1.00
  -8   4   1    0.90    0.80
   8   4  -1    2.30    1.20
   8   4  -1    1.80    0.60
  -7  -4   1   35.70    2.80
   7  -4  -1   32.50    2.60
   7   4  -1   31.90    2.50
  -7   4   1   37.10    2.00
  -7   4   1   32.00    2.30
   7   4  -1   34.80    2.00
  -6  -4   1  287.57   13.20
   6  -4  -1  274.27   13.20
  -6   4   1  275.37   13.00
   6   4  -1  289.97   13.30
  -6   4   1  264.87   12.80
   6   4  -1  288.67   12.90
  -5  -4   1  727.03   32.20
   5  -4  -1  708.43   32.20
   5   4  -1  719.43   32.00
  -5   4   1  667.73   32.10
  -5   4   1  692.63   31.90
   5   4  -1  725.13   32.30
  -4  -4   1   50.39    3.20
   4  -4  -1   57.89    3.30
  -4   4   1   61.69    2.80
   4   4  -1   51.79    3.20
   4   4  -1   51.39    2.90
  -4   4   1   55.29    3.00
   3  -4  -1  254.27   11.90
  -3  -4   1  259.57   11.70
   3   4  -1  254.87   11.70
   3   4  -1  250.37   11.90
  -3   4   1  247.58   11.80
  -2  -4   1    0.80    0.60
   2  -4  -1   -0.20    1.00
  -2   4   1   -1.20    0.80
   2   4  -1    0.50    0.90
   2   4  -1    0.40    0.70
  -1  -4   1    6.40    0.90
   1   4  -1    5.60    1.00
   1   4  -1    5.80    1.30
  -1   4   1    5.20    1.10
  -1   4   1    6.00    0.90
   0   4   1   73.99    4.10
   0   4   1   84.09    4.30
   0   4   1   85.29    4.00
   0   4  -1   74.79    4.30
   1  -4   1   88.49    4.50
   1   4   1   80.59    4.20
   1   4   1   83.89    4.20
  -1   4  -1   84.39    4.20
   2  -4   1  418.76   18.60
  -2   4  -1  392.36   18.40
   2   4   1  395.16   18.50
   2   4   1  396.06   18.30
   2   4   1  405.06   18.50
   3  -4   1  383.66   17.70
   3   4   1  378.26   17.50
   3   4   1  390.96   17.80
  -3   4  -1  377.56   17.60
   3   4   1  387.26   17.70
   4  -4   1   71.89    3.90
   4   4   1   70.19    3.90
   4   4   1   69.79    3.60
  -4   4  -1   69.29    3.30
  -4   4  -1   70.79    3.70
   4   4   1   73.29    4.00
   5  -4   1   80.59    4.30
  -5   4  -1   66.19    3.90
   5   4   1   78.89    4.10
  -5   4  -1   72.69    3.50
   5   4   1   72.79    3.70
   5   4   1   68.89    4.10
   6  -4   1  268.67   12.70
  -6   4  -1  284.47   12.30
   6   4   1  263.87   12.40
   6   4   1  266.87   12.70
  -6   4  -1  268.67   12.60
   6   4   1  263.57   12.80
   7  -4   1   41.10    2.60
   7   4   1   35.40    2.10
  -7   4  -1   36.90    2.10
   7   4   1   38.80    2.60
   7   4   1   35.20    3.00
   8  -4   1   13.80    2.00
   8   4   1   16.30    1.20
  -8   4  -1   13.10    1.40
  -8   4  -1   14.50    1.60
   8   4   1   14.30    1.90
   9  -4   1   40.00    2.80
   9   4   1   35.30    2.00
  -9   4  -1   31.80    2.40
   9   4   1   34.10    2.70
  -9   4  -1   36.80    2.50
  10  -4   1  116.29    6.10
 -10   4  -1  110.79    5.90
 -10   4  -1  113.89    5.80
  10   4   1  119.79    5.50
  10   4   1  119.79    6.10
 -11  -4  -1    4.30    2.20
  11  -4   1    7.50    1.70
 -11   4  -1    5.40    1.30
  11   4   1    7.00    1.60
 -11   4  -1    6.70    1.20
 -12  -4  -1  191.78   10.20
  12  -4   1  200.88    9.90
 -12   4  -1  203.28    9.60
  12   4   1  200.18    9.90
 -12   4  -1  201.08    9.70
  13  -4   1  217.58   10.60
 -13  -4  -1  206.08   10.90
 -13   4  -1  220.38   10.30
 -13   4  -1  215.28   10.30
  13   4   1  207.68   10.50
  14  -4   1   82.29    4.90
 -14  -4  -1   73.19    5.40
 -14   4  -1   79.29    4.60
 -14   4  -1   80.39    4.50
  14   4   1   76.89    4.90
 -15  -4  -1   28.70    4.90
  15  -4   1   35.80    3.50
  15   4   1   27.40    4.00
 -15   4  -1   35.80    2.90
 -15   4  -1   32.40    3.10
 -16  -4  -1  116.89    7.10
  16  -4   1  119.99    6.70
 -16   4  -1  125.29    6.60
  16   4   1  115.39    6.90
 -16   4  -1  131.49    6.50
 -17  -4  -1   -3.00    1.90
  17  -4   1   -0.70    1.90
 -17   4  -1   -2.70    1.50
  17   4   1    3.10    2.00
  18  -4   1    3.30    2.00
 -18  -4  -1    6.60    2.40
  18   4   1   10.20    2.50
 -19  -4  -1    0.60    2.20
  19  -4   1   -1.50    2.20
  19   4   1    2.10    2.10
 -19   4  -1   -1.50    1.90
  20  -4   1   27.60    3.90
 -20  -4  -1   37.20    4.10
  20   4   1   33.20    4.10
 -20   4  -1   20.40    3.90
  21  -4   1   30.10    3.90
 -21  -4  -1   25.20    3.90
  21   4   1   31.00    4.30
 -21   4  -1   21.50    3.70
  22  -4   1   18.40    3.10
 -22  -4  -1   11.80    2.90
  22   4   1   10.80    3.00
 -22   4  -1    8.80    2.70
  23  -4   1    2.80    3.00
 -23  -4  -1    2.60    2.60
 -23   4  -1   -2.60    2.70
  23   4   1    0.90    2.90
  24  -4   1   -3.00    2.70
 -24  -4  -1   -1.40    2.60
 -24   4  -1   -6.90    2.80
  24   4   1   -1.10    2.90
  25  -4   1   -2.00    2.70
 -25  -4  -1    3.10    2.60
  25   4   1    4.00    3.20
 -25   4  -1   -4.90    2.90
  25  -5  -1   -2.90    3.00
 -25  -5   1    0.00    3.00
  25   5  -1   -1.90    3.20
  24  -5  -1   55.79    5.10
 -24  -5   1   44.80    5.40
 -24   5   1   66.09    5.80
  24   5  -1   53.09    5.40
  23  -5  -1    2.80    2.60
 -23  -5   1    3.60    2.80
  23   5  -1    4.40    2.90
 -23   5   1    8.00    2.60
  22  -5  -1   23.20    3.40
 -22  -5   1   11.40    2.90
  22   5  -1   20.70    3.70
 -22   5   1   14.20    2.90
  21  -5  -1   27.40    4.10
 -21  -5   1   28.20    4.00
 -21   5   1   21.30    3.20
  21   5  -1   28.20    4.30
  20  -5  -1   30.90    3.90
 -20  -5   1   25.30    3.80
  20   5  -1   31.90    4.10
 -20   5   1   20.60    3.60
  19  -5  -1   28.40    3.80
 -19  -5   1   26.50    4.20
 -19   5   1   27.30    3.50
  19   5  -1   29.40    4.00
 -18  -5   1   -0.70    2.10
  18  -5  -1   -1.30    1.90
  18   5  -1    1.50    2.30
 -18   5   1   -1.30    1.90
 -17  -5   1   14.00    2.70
  17  -5  -1   17.00    2.70
 -17   5   1   18.70    2.60
 -17   5   1   14.30    2.30
  17   5  -1   17.10    2.80
  16  -5  -1    0.30    1.90
 -16  -5   1   -2.90    1.90
 -16   5   1   -1.10    1.60
  16   5  -1    0.40    2.10
 -16   5   1    4.20    1.50
  15  -5  -1    1.00    1.80
 -15  -5   1    0.30    2.10
  15   5  -1    0.90    1.90
 -15   5   1    2.60    1.40
 -15   5   1    1.20    1.50
  14  -5  -1   16.10    2.70
 -14  -5   1   16.10    3.20
 -14   5   1   16.90    2.40
  14   5  -1   19.50    3.10
 -14   5   1   17.00    2.40
  13  -5  -1   74.29    4.70
 -13  -5   1   81.59    5.20
 -13   5   1   75.29    4.40
 -13   5   1   82.19    4.50
  13   5  -1   82.19    5.00
 -12  -5   1    0.30    1.70
  12  -5  -1    1.80    1.70
 -12   5   1    1.40    1.20
  12   5  -1    2.10    1.60
 -12   5   1    0.60    1.20
 -11  -5   1    3.00    1.80
  11  -5  -1    3.20    1.70
  11   5  -1    3.10    1.50
 -11   5   1    0.70    1.20
  11   5  -1    4.00    0.80
  10  -5  -1  131.49    6.80
 -10  -5   1  135.19    7.00
  10   5  -1  124.19    6.10
 -10   5   1  133.59    6.30
  10   5  -1  123.19    6.80
 -10   5   1  126.89    6.50
   9  -5  -1    0.50    1.40
  -9  -5   1    0.40    1.40
   9   5  -1    3.20    1.40
   9   5  -1    1.50    0.70
  -9   5   1    1.30    0.80
  -9   5   1    1.10    1.00
   8  -5  -1  535.25   23.60
  -8  -5   1  535.75   23.70
  -8   5   1  488.35   23.10
   8   5  -1  524.45   23.70
  -8   5   1  507.25   23.40
   8   5  -1  469.55   23.20
  -7  -5   1   90.89    5.10
   7  -5  -1   90.39    5.00
  -7   5   1   91.29    4.80
  -7   5   1   94.99    4.50
   7   5  -1   90.09    5.10
  -6  -5   1   14.10    2.10
   6  -5  -1   13.40    2.10
   6   5  -1   13.50    1.40
   6   5  -1   13.60    2.00
  -6   5   1   18.40    1.20
  -6   5   1   11.80    1.50
  -5  -5   1    5.90    1.30
   5  -5  -1    7.60    1.50
   5   5  -1    8.60    1.50
  -5   5   1   11.00    1.00
  -5   5   1    8.90    1.30
   5   5  -1    7.60    1.10
   4  -5  -1  344.57   16.20
  -4  -5   1  359.66   16.00
   4   5  -1  337.77   16.10
  -4   5   1  343.97   16.00
   4   5  -1  339.17   15.90
  -3  -5   1   81.89    3.90
   3  -5  -1   75.09    4.30
  -3   5   1   69.69    3.90
   3   5  -1   77.19    4.30
   3   5  -1   72.39    3.90
   2  -5  -1  605.74   27.10
  -2  -5   1  599.04   26.60
   2   5  -1  553.64   26.70
  -1  -5   1   52.79    2.50
   1  -5  -1   52.09    3.30
  -1   5   1   49.99    2.60
   1   5  -1   43.40    2.80
   1   5  -1   54.69    3.60
  -1   5   1   49.00    2.90
   0   5   1  609.34   28.20
   0   5  -1  598.44   28.20
   0   5   1  641.44   28.10
   0   5   1  625.94   28.40
   1   5   1    0.60    0.90
   1   5   1    2.20    0.80
   1   5   1   -0.10    1.20
   2  -5   1  658.63   29.90
   2   5   1  656.43   29.70
   2   5   1  624.44   29.60
   2   5   1  682.03   30.00
  -2   5  -1  640.14   29.70
   3  -5   1   23.20    2.20
  -3   5  -1   21.90    2.00
   3   5   1   23.20    1.80
   3   5   1   28.60    2.10
   3   5   1   28.10    2.40
   4  -5   1    2.10    1.20
   4   5   1    2.10    1.00
   4   5   1    1.40    0.80
  -4   5  -1    0.30    1.00
   4   5   1    2.80    1.20
   5  -5   1    0.10    1.20
  -5   5  -1    0.40    1.00
   5   5   1    0.40    1.10
   5   5   1   -0.70    0.70
   5   5   1    0.00    0.90
   6  -5   1  100.59    5.40
   6   5   1  102.19    4.90
   6   5   1   99.09    5.40
  -6   5  -1   97.89    4.70
  -6   5  -1  101.59    5.20
   6   5   1  101.09    5.40
   7  -5   1   27.70    2.60
  -7   5  -1   27.20    1.70
  -7   5  -1   29.80    2.20
   7   5   1   29.10    2.50
   7   5   1   25.00    2.00
   8  -5   1   54.49    3.60
   8   5   1   49.80    3.10
  -8   5  -1   62.39    3.40
  -8   5  -1   57.89    3.00
   8   5   1   61.39    3.70
   9  -5   1    3.10    1.40
   9   5   1    3.90    0.90
   9   5   1    3.50    1.40
  -9   5  -1    3.70    1.20
  -9   5  -1    2.40    1.00
  10  -5   1    4.90    1.60
 -10  -5  -1    5.20    2.10
 -10   5  -1    6.00    1.40
 -10   5  -1    4.90    1.20
  10   5   1    3.90    1.50
  10   5   1    8.20    1.30
  11  -5   1   64.99    4.20
 -11  -5  -1   60.79    4.70
 -11   5  -1   61.29    3.60
  11   5   1   63.79    3.30
  11   5   1   65.79    4.20
 -11   5  -1   63.79    3.90
 -12  -5  -1   43.20    4.10
  12  -5   1   47.40    3.70
 -12   5  -1   46.20    3.10
 -12   5  -1   53.29    3.30
  12   5   1   44.20    3.60
  13  -5   1    4.80    1.90
 -13  -5  -1    0.20    2.00
  13   5   1    3.80    1.70
 -13   5  -1    4.20    1.50
 -13   5  -1    2.70    1.40
  14  -5   1   13.20    2.40
 -14  -5  -1    7.60    2.50
 -14   5  -1   12.00    1.80
  14   5   1   12.30    2.30
 -15  -5  -1    1.20    2.30
  15  -5   1    3.60    2.00
  15   5   1    1.70    1.90
 -15   5  -1    0.00    1.60
 -15   5  -1    1.70    1.50
  16  -5   1   -0.10    1.80
 -16  -5  -1   -4.50    2.10
 -16   5  -1    2.70    1.60
 -16   5  -1   -4.10    1.60
  16   5   1    1.70    2.10
 -17  -5  -1    1.90    2.30
  17  -5   1    4.60    2.10
 -17   5  -1    1.80    1.90
 -17   5  -1   10.50    2.00
  17   5   1    4.40    2.20
 -18  -5  -1   -2.50    2.20
  18  -5   1    1.50    2.30
 -18   5  -1   -2.60    1.80
  18   5   1   -1.50    2.30
 -19  -5  -1    6.10    2.60
  19  -5   1    6.20    2.30
  19   5   1    9.60    2.80
 -19   5  -1    4.40    2.30
 -20  -5  -1    0.90    2.50
  20  -5   1   -1.60    2.60
  20   5   1   -0.20    2.50
 -21  -5  -1   35.30    4.60
  21  -5   1   44.10    4.50
  21   5   1   40.30    4.70
  22  -5   1    8.90    2.80
 -22  -5  -1   14.60    3.10
  22   5   1   10.20    3.20
 -23  -5  -1   26.20    4.50
  23  -5   1   33.10    4.40
 -23   5  -1   18.00    3.70
  23   5   1   31.60    4.70
 -24  -5  -1   83.79    6.50
  24  -5   1   89.69    6.40
  24   5   1  113.79    8.60
 -24  -6   1    5.60    3.10
  24  -6  -1    2.30    3.00
  24   6  -1    5.40    3.60
 -23  -6   1   -1.60    2.70
  23  -6  -1   -0.40    2.90
  23   6  -1    4.70    3.10
 -22  -6   1    1.00    2.70
  22  -6  -1    3.90    2.70
  22   6  -1    3.30    3.10
  21  -6  -1    8.00    3.00
 -21  -6   1    9.30    2.90
  21   6  -1    6.80    2.90
 -20  -6   1   21.60    3.90
  20  -6  -1   26.10    4.10
  20   6  -1   31.90    4.30
 -19  -6   1    5.80    2.60
  19  -6  -1    9.20    2.70
  19   6  -1    8.50    2.60
  18  -6  -1   32.30    4.00
 -18  -6   1   24.70    4.10
  18   6  -1   34.00    4.10
 -18   6   1   43.50    4.60
 -18   6   1   35.70    3.70
  17  -6  -1   32.00    3.90
 -17  -6   1   29.70    3.90
  17   6  -1   35.90    4.10
 -17   6   1   36.70    3.40
 -16  -6   1   -1.30    2.10
  16  -6  -1    0.30    2.10
 -16   6   1    1.20    1.60
  16   6  -1   -0.30    2.00
 -16   6   1    3.40    1.60
 -15  -6   1  121.49    7.80
  15  -6  -1  147.19    7.70
 -15   6   1  141.19    7.10
 -15   6   1  143.99    7.30
  15   6  -1  136.49    7.70
  14  -6  -1   -0.30    1.90
 -14  -6   1   -0.70    2.30
 -14   6   1    1.40    1.40
 -14   6   1    2.20    1.30
  14   6  -1   -0.60    1.90
 -13  -6   1   44.60    4.20
 -13   6   1   54.99    3.30
 -13   6   1   55.09    3.60
  13   6  -1   50.79    4.20
 -12  -6   1   11.40    2.30
  12  -6  -1   18.40    2.90
  12   6  -1   15.00    2.40
 -12   6   1   15.00    2.30
 -12   6   1   21.30    2.00
  11  -6  -1    4.00    1.80
 -11  -6   1    2.50    1.80
  11   6  -1    4.70    1.70
 -11   6   1    5.50    1.50
 -10  -6   1   -0.20    1.50
  10  -6  -1    1.20    1.50
  10   6  -1    1.80    0.90
  10   6  -1    3.90    1.60
 -10   6   1    0.10    1.30
  -9  -6   1  150.48    7.50
   9  -6  -1  138.09    7.40
  -9   6   1  147.49    6.90
  -9   6   1  142.59    7.20
   9   6  -1  142.69    7.50
   9   6  -1  128.99    6.80
   8  -6  -1    1.30    1.40
  -8  -6   1    1.80    1.50
  -8   6   1    1.80    1.30
   8   6  -1    1.20    1.50
   8   6  -1    0.30    0.80
  -7  -6   1   98.19    5.30
   7  -6  -1   94.79    5.40
   7   6  -1   97.29    4.90
  -7   6   1   90.39    5.10
  -7   6   1  102.89    4.80
   7   6  -1   96.79    5.50
   6  -6  -1    1.70    1.30
  -6  -6   1    1.00    1.30
   6   6  -1    2.70    1.40
  -6   6   1    2.90    1.10
  -5  -6   1   86.29    4.50
   5  -6  -1   80.69    4.80
  -5   6   1   81.19    4.50
   5   6  -1   82.99    4.30
   5   6  -1   82.89    4.80
  -4  -6   1    5.50    1.20
   4  -6  -1    5.70    1.50
  -4   6   1    6.40    1.20
   4   6  -1    7.50    1.50
   4   6  -1    3.90    1.10
   3  -6  -1    2.80    1.40
  -3  -6   1    1.90    0.90
   3   6  -1    3.90    1.40
   3   6  -1    2.90    1.10
  -3   6   1    4.00    1.10
   2  -6  -1   52.39    3.50
  -2  -6   1   49.99    2.80
  -2   6   1   50.19    3.00
   2   6  -1   56.39    3.60
   2   6  -1   52.59    3.10
  -1  -6   1   89.29    4.20
   1  -6  -1   88.19    4.90
   1   6  -1   91.79    5.00
  -1   6   1   86.09    4.60
   1   6  -1   84.49    4.60
   0   6   1  114.39    5.60
   0   6  -1  108.39    5.60
   1  -6   1   88.19    4.90
   1   6   1   86.09    4.50
  -1   6  -1   80.69    4.50
   1   6   1   88.39    4.80
   2  -6   1    0.50    1.30
   2   6   1    1.20    1.20
   2   6   1    1.10    1.00
  -2   6  -1   -0.40    1.00
   3  -6   1   47.20    3.20
  -3   6  -1   43.80    2.90
   3   6   1   47.40    2.80
   3   6   1   46.90    3.20
   4  -6   1    9.10    1.60
   4   6   1    8.10    1.70
  -4   6  -1    8.40    1.40
   4   6   1    9.50    1.30
   5  -6   1  233.28   11.10
   5   6   1  228.48   11.10
  -5   6  -1  222.88   10.80
   5   6   1  223.58   10.70
   6  -6   1   31.50    2.70
   6   6   1   34.30    2.90
   6   6   1   34.10    2.30
  -6   6  -1   29.80    2.50
   7  -6   1  172.08    8.60
  -7   6  -1  162.88    8.30
   7   6   1  173.48    8.60
   8  -6   1    8.20    1.70
   8   6   1    8.70    1.80
  -8   6  -1   11.60    1.70
   8   6   1    8.10    1.20
   9  -6   1  154.58    7.80
  -9  -6  -1  156.48    8.20
   9   6   1  149.39    8.00
   9   6   1  150.08    7.40
  -9   6  -1  155.68    7.70
  -9   6  -1  149.59    7.20
  10  -6   1    5.80    1.80
 -10  -6  -1    4.40    2.00
  10   6   1    1.90    1.60
  10   6   1    5.40    1.10
 -10   6  -1    7.40    1.60
 -11  -6  -1  169.88    9.10
  11  -6   1  176.08    8.80
 -11   6  -1  164.88    8.50
 -11   6  -1  176.38    8.20
  11   6   1  169.68    8.20
  11   6   1  169.28    8.90
  12  -6   1    2.10    1.80
 -12  -6  -1   -1.20    1.90
 -12   6  -1   -1.70    1.40
  12   6   1    0.40    1.70
 -12   6  -1   -1.30    1.30
 -13  -6  -1  127.79    7.40
  13  -6   1  127.99    7.00
 -13   6  -1  132.59    6.80
 -13   6  -1  124.19    6.50
 -14  -6  -1    0.80    2.30
  14  -6   1    2.60    1.90
 -14   6  -1    3.10    1.60
  14   6   1    2.90    1.90
 -14   6  -1   -1.00    1.40
  15  -6   1   45.70    3.80
 -15  -6  -1   31.80    4.20
  15   6   1   42.90    3.90
 -15   6  -1   32.20    3.20
 -15   6  -1   43.10    3.40
  16  -6   1    6.40    2.10
 -16  -6  -1    5.70    2.60
 -16   6  -1    9.80    2.10
  16   6   1   10.90    2.50
 -17  -6  -1   39.50    4.80
  17  -6   1   51.09    4.40
 -17   6  -1   56.59    4.10
  17   6   1   48.50    4.60
  18  -6   1   -1.20    2.30
 -18  -6  -1   -1.00    2.30
  18   6   1   -2.20    2.20
 -18   6  -1   -2.20    1.90
  19  -6   1   49.50    4.50
 -19  -6  -1   41.90    4.80
  19   6   1   41.20    4.50
  20  -6   1   24.70    3.40
 -20  -6  -1   19.20    3.30
  20   6   1   20.10    3.30
 -21  -6  -1    1.60    2.70
  21  -6   1    3.10    2.60
  21   6   1    1.70    3.00
  22  -6   1    8.00    3.10
 -22  -6  -1    3.60    2.90
  22   6   1    9.00    3.20
  23   6   1    1.40    3.50
  24  -6   1    7.00    3.00
 -24  -6  -1    7.80    3.10
  24   6   1    8.10    3.60
 -23  -7   1   46.20    5.40
  23  -7  -1   52.39    5.40
  23   7  -1   56.49    5.80
  22  -7  -1   31.50    4.10
  22   7  -1   25.70    4.20
 -21  -7   1    0.50    2.80
  21  -7  -1    4.30    2.70
  21   7  -1    0.50    3.10
 -20  -7   1   26.10    4.40
  20  -7  -1   29.30    4.20
  20   7  -1   28.00    4.60
  19  -7  -1   11.70    2.80
 -19  -7   1   19.90    3.20
  19   7  -1   14.40    3.40
 -19   7   1   16.60    2.80
  18  -7  -1    2.40    2.50
 -18  -7   1   -2.10    2.40
  18   7  -1    0.40    2.70
 -18   7   1   -2.80    2.00
  17  -7  -1   -0.70    2.30
 -17  -7   1    0.20    2.30
 -17   7   1   -1.60    1.80
  17   7  -1    2.00    2.30
  16  -7  -1   78.99    5.20
 -16  -7   1   60.39    5.30
  16   7  -1   75.29    5.50
 -16   7   1   77.39    4.90
  15  -7  -1   13.50    2.30
 -15  -7   1    9.80    2.40
  15   7  -1    9.60    2.50
  14  -7  -1   -2.40    1.80
 -14  -7   1    1.20    2.10
 -14   7   1    1.50    1.50
  14   7  -1    0.50    2.00
 -13  -7   1    2.20    2.00
  13  -7  -1    3.90    2.00
 -13   7   1    1.60    1.70
  13   7  -1    4.00    2.20
  12  -7  -1    0.60    1.90
 -12  -7   1    1.70    1.90
  12   7  -1    2.30    2.10
 -12   7   1    2.80    1.60
  11  -7  -1    3.30    1.80
 -11  -7   1    3.90    1.80
  11   7  -1    2.40    1.90
  11   7  -1    2.10    1.30
 -11   7   1    3.90    1.50
 -10  -7   1    0.20    1.70
  10  -7  -1    4.80    1.90
 -10   7   1    2.30    1.40
  10   7  -1    2.30    1.00
  10   7  -1    3.20    1.80
  -9  -7   1   14.70    2.60
   9  -7  -1   13.50    2.10
   9   7  -1   11.20    1.80
   9   7  -1   15.50    2.40
  -9   7   1   13.60    1.90
  -8  -7   1   33.90    3.10
   8  -7  -1   35.10    3.10
   8   7  -1   28.80    3.30
  -8   7   1   31.70    2.90
   8   7  -1   35.00    2.50
  -7  -7   1   16.10    2.50
   7  -7  -1   13.10    2.00
   7   7  -1   25.20    3.00
  -7   7   1   15.50    2.20
   7   7  -1   19.00    2.00
   6  -7  -1  172.48    8.60
  -6  -7   1  175.38    8.40
   6   7  -1  164.48    8.20
   6   7  -1  169.18    8.70
  -6   7   1  158.28    8.30
  -5  -7   1   54.79    3.50
   5  -7  -1   54.59    3.90
   5   7  -1   49.50    3.80
   5   7  -1   60.89    3.40
  -5   7   1   55.29    3.50
   4  -7  -1  552.44   25.30
  -4   7   1  522.85   25.00
   4   7  -1  548.95   25.00
   4   7  -1  554.54   25.40
   3  -7  -1  289.97   14.30
  -3  -7   1  298.27   13.80
  -3   7   1  300.97   14.10
   3   7  -1  300.47   14.40
   3   7  -1  301.97   14.00
   2  -7  -1   68.79    4.30
  -2  -7   1   64.19    3.40
   2   7  -1   70.89    4.30
  -2   7   1   65.49    3.80
   2   7  -1   64.39    3.80
   1  -7  -1   19.20    2.50
  -1  -7   1   10.20    1.10
   1   7  -1   15.20    1.80
  -1   7   1   18.00    1.90
   0  -7  -1  104.69    4.60
   0  -7   1   90.99    5.40
   0   7   1   89.89    5.00
   0   7  -1   92.09    5.00
   1  -7   1   59.49    4.10
  -1  -7  -1   72.69    3.40
   1   7   1   56.29    3.60
   1   7   1   57.69    4.10
  -1   7  -1   59.19    3.60
   2  -7   1  308.27   14.60
  -2   7  -1  303.27   14.30
   2   7   1  293.77   14.20
   2   7   1  310.17   14.60
   3  -7   1  301.77   14.30
   3   7   1  296.87   14.30
  -3   7  -1  295.07   14.00
   3   7   1  294.87   13.90
   4  -7   1   36.90    3.20
   4   7   1   42.90    3.40
   4   7   1   36.00    2.60
  -4   7  -1   39.50    2.80
   5  -7   1  190.38    9.40
   5   7   1  189.28    8.90
  -5   7  -1  177.98    9.10
   5   7   1  183.98    9.40
   6  -7   1  428.76   20.10
  -6  -7  -1  454.35   20.10
  -6   7  -1  403.06   19.90
   6   7   1  438.06   20.20
   6   7   1  416.56   19.80
   7  -7   1   16.60    2.80
  -7  -7  -1   17.20    2.80
   7   7   1   17.30    2.90
   7   7   1   17.60    1.90
  -7   7  -1   16.10    2.40
  -8  -7  -1   21.10    3.00
   8  -7   1   23.50    2.90
  -8   7  -1   17.80    2.30
   8   7   1   18.30    2.00
   8   7   1   18.60    2.90
   9  -7   1    8.60    2.00
  -9  -7  -1   11.20    2.20
   9   7   1   10.70    1.70
  -9   7  -1    8.70    1.70
   9   7   1   11.90    2.30
  10  -7   1    7.40    2.00
 -10  -7  -1   10.60    2.30
  10   7   1   11.50    2.30
 -10   7  -1    8.80    1.70
  10   7   1    7.70    1.30
  11  -7   1    8.70    2.60
 -11  -7  -1   12.20    2.60
 -11   7  -1   14.70    2.40
  11   7   1   11.40    2.30
  11   7   1   15.90    1.90
  12  -7   1   26.30    3.30
 -12  -7  -1   30.40    3.90
  12   7   1   28.00    3.60
 -12   7  -1   32.70    3.10
  13  -7   1    0.60    2.00
 -13  -7  -1    2.20    2.40
 -13   7  -1    0.60    1.60
  13   7   1    2.00    2.00
 -14  -7  -1   19.60    3.70
  14  -7   1   20.90    3.40
  14   7   1   14.20    2.50
 -14   7  -1   19.20    3.60
 -15  -7  -1    7.40    2.50
  15  -7   1   16.60    2.70
 -15   7  -1   11.60    2.30
  15   7   1    6.60    2.30
 -16  -7  -1    8.90    2.80
  16  -7   1    9.40    2.60
 -16   7  -1   12.70    2.40
  16   7   1    8.80    2.70
 -17  -7  -1   -0.90    2.40
  17  -7   1    2.60    2.30
  17   7   1    1.40    2.40
 -17   7  -1    2.10    2.00
 -18  -7  -1   38.70    4.90
  18  -7   1   51.09    4.50
 -18   7  -1   44.20    4.30
  18   7   1   48.20    4.90
 -19  -7  -1   -1.90    2.50
  19  -7   1   -0.10    2.60
  19   7   1   -0.60    2.80
 -20  -7  -1    4.50    2.80
  20  -7   1    5.10    2.60
  20   7   1    3.10    3.20
 -21  -7  -1    5.30    2.90
  21  -7   1   -0.10    2.90
  21   7   1    4.90    3.30
 -22  -7  -1    7.50    3.30
  22   7   1    8.70    3.50
 -23  -7  -1    9.30    3.00
  23  -7   1   15.70    3.60
  23   7   1   13.80    3.70
  22  -8  -1   -1.70    3.00
 -22  -8   1   -2.60    3.60
  22   8  -1   -0.90    3.60
  21  -8  -1   -4.40    2.70
 -21  -8   1   -1.40    2.90
  21   8  -1    0.00    3.50
  20  -8  -1    9.60    3.20
 -20  -8   1    8.40    3.00
  20   8  -1    6.90    3.50
  19  -8  -1    0.70    2.50
 -19  -8   1    3.20    2.90
 -19   8   1    6.20    2.50
  19   8  -1    6.30    3.30
  18  -8  -1   10.20    2.90
 -18  -8   1    8.50    3.00
  18   8  -1    9.60    2.90
 -18   8   1    4.90    2.40
  17  -8  -1   16.10    3.10
 -17  -8   1   13.60    3.00
  17   8  -1   16.60    3.40
 -17   8   1   16.40    2.60
 -16  -8   1   36.70    4.30
  16  -8  -1   38.10    4.20
 -16   8   1   42.30    3.90
  16   8  -1   40.80    4.60
 -15  -8   1   -2.20    2.20
  15  -8  -1   -2.50    2.10
  15   8  -1    0.50    2.30
 -15   8   1   -0.10    1.70
 -14  -8   1   40.10    4.00
  14  -8  -1   41.90    4.00
  14   8  -1   37.70    4.30
 -14   8   1   41.00    3.60
  13  -8  -1    7.80    2.10
 -13  -8   1   11.80    2.70
 -13   8   1    7.90    1.80
  13   8  -1    7.90    2.40
  12  -8  -1   98.49    6.10
 -12  -8   1   91.49    6.20
  12   8  -1  101.19    6.30
 -12   8   1  107.29    5.70
  11  -8  -1   27.50    3.40
 -11  -8   1   30.40    3.30
  11   8  -1   22.30    3.30
 -11   8   1   20.00    3.10
  11   8  -1   25.20    2.40
 -10  -8   1  253.97   12.70
  10  -8  -1  257.17   12.50
 -10   8   1  251.17   12.30
  10   8  -1  260.57   12.20
  10   8  -1  250.17   12.80
   9  -8  -1    4.40    2.70
  -9  -8   1    1.50    1.80
  -9   8   1    1.30    1.40
   9   8  -1    3.70    1.30
   9   8  -1    0.40    1.90
  -8  -8   1   52.09    3.80
   8  -8  -1   52.69    4.10
  -8   8   1   49.99    3.60
   8   8  -1   48.30    3.40
   8   8  -1   55.39    4.30
  -7  -8   1   29.70    2.90
   7  -8  -1   24.60    2.90
   7   8  -1   25.40    3.30
  -7   8   1   27.80    2.80
   7   8  -1   26.30    2.50
   6  -8  -1  247.28   12.20
  -6  -8   1  259.27   12.00
   6   8  -1  251.97   12.50
   6   8  -1  247.78   11.90
  -6   8   1  238.38   11.90
   5  -8  -1   70.79    4.50
  -5  -8   1   67.39    4.10
  -5   8   1   68.29    4.10
   5   8  -1   69.59    4.10
   5   8  -1   73.09    4.90
  -4  -8   1  214.78   10.60
   4  -8  -1  220.68   11.00
   4   8  -1  228.78   11.20
   4   8  -1  225.88   10.70
  -4   8   1  221.88   10.70
  -3  -8   1   98.29    5.20
   3  -8  -1  101.19    6.00
   3   8  -1  112.89    5.60
  -3   8   1  102.19    5.70
   3   8  -1  113.19    6.30
   2  -8  -1    4.30    1.90
  -2   8   1    4.50    1.40
   2   8  -1    5.80    2.00
   2   8  -1    6.40    1.50
   1  -8  -1  146.59    7.70
  -1   8   1  140.39    7.10
   1   8  -1  140.69    7.20
   0  -8  -1    4.00    1.90
   0  -8   1    4.40    1.90
   0   8   1    4.40    1.40
   0   8  -1    4.50    1.50
  -1  -8  -1    2.00    1.00
   1  -8   1   -0.90    1.70
  -1   8  -1    2.20    1.30
   1   8   1    0.70    1.20
  -2  -8  -1   76.29    4.10
   2  -8   1   70.29    4.80
   2   8   1   81.49    5.00
   2   8   1   69.59    4.20
  -2   8  -1   69.89    4.30
   3  -8   1   13.00    2.20
   3   8   1   13.20    2.20
  -3   8  -1   12.60    2.10
   3   8   1   13.70    1.80
  -4  -8  -1   19.00    2.50
   4  -8   1   17.30    2.60
   4   8   1   18.40    2.60
   4   8   1   18.60    2.20
  -4   8  -1   17.20    2.50
   5  -8   1   20.20    2.80
  -5  -8  -1   22.50    2.70
   5   8   1   22.10    2.90
  -5   8  -1   20.10    2.60
   5   8   1   22.00    2.30
   6  -8   1   23.60    3.00
  -6  -8  -1   18.90    2.70
  -6   8  -1   16.70    2.30
   6   8   1   22.20    3.20
   6   8   1   19.10    2.30
  -7  -8  -1    1.40    1.80
   7  -8   1    2.20    1.80
  -7   8  -1   -0.30    1.50
   7   8   1    1.40    1.20
   7   8   1    1.70    1.90
   8  -8   1  346.97   16.80
  -8  -8  -1  358.86   16.80
   8   8   1  351.96   17.00
   8   8   1  341.87   16.40
  -8   8  -1  348.27   16.50
  -9  -8  -1   23.60    3.30
   9  -8   1   20.20    3.20
   9   8   1   22.80    3.60
   9   8   1   22.90    2.30
  -9   8  -1   22.10    2.80
 -10  -8  -1   11.80    2.60
  10  -8   1   10.50    2.30
  10   8   1   10.70    2.50
  10   8   1   12.80    1.80
 -11  -8  -1   -0.90    2.00
  11  -8   1   -0.80    1.70
  11   8   1   -1.00    1.40
  11   8   1   -0.90    2.10
 -11   8  -1    0.70    1.80
  12  -8   1   65.59    4.80
  12   8   1   64.49    5.10
 -12   8  -1   63.99    4.40
  13  -8   1   15.40    2.70
 -13  -8  -1   12.30    2.80
  13   8   1   14.20    2.80
 -13   8  -1   10.90    2.00
 -14  -8  -1   34.30    4.40
  14  -8   1   40.50    4.10
 -14   8  -1   43.90    3.70
  14   8   1   43.60    4.50
 -15  -8  -1    1.10    2.50
  15  -8   1   -0.80    2.40
  15   8   1    3.20    2.60
 -15   8  -1    0.00    1.90
 -16  -8  -1   49.60    4.80
  16  -8   1   58.39    4.80
 -16   8  -1   54.69    4.50
  16   8   1   57.19    5.20
  17  -8   1    6.70    2.60
 -17  -8  -1    8.10    2.90
  17   8   1   11.10    3.20
 -17   8  -1    6.80    2.20
 -18  -8  -1    1.20    2.70
  18  -8   1    4.50    2.50
  18   8   1    5.00    2.90
 -18   8  -1    4.50    2.40
  19  -8   1   10.90    3.10
 -19  -8  -1    5.90    3.00
 -19   8  -1   11.00    2.90
  19   8   1   10.30    3.40
  20  -8   1   12.30    3.10
 -20  -8  -1   10.40    3.30
  20   8   1   15.40    3.80
 -21  -8  -1   -2.20    3.20
  21   8   1    0.60    3.50
  22  -8   1   -1.10    3.10
 -22  -8  -1   -2.80    2.90
  22   8   1    3.90    3.60
  21  -9  -1   23.20    3.90
  21   9  -1   10.60    4.10
  20  -9  -1   12.10    3.40
 -20  -9   1    8.00    3.50
  20   9  -1   14.20    4.20
 -19  -9   1   -1.10    2.90
  19  -9  -1    1.90    3.10
 -19   9   1    4.40    2.50
  19   9  -1    0.60    3.60
  18  -9  -1   -2.00    2.50
 -18  -9   1   -3.40    2.80
  18   9  -1    0.60    3.10
 -18   9   1   -3.60    2.50
  17  -9  -1   47.80    4.70
 -17  -9   1   44.60    5.10
  17   9  -1   46.60    5.30
 -17   9   1   44.70    4.50
  16  -9  -1    4.10    2.60
 -16  -9   1   -0.30    2.80
  16   9  -1    3.00    2.90
 -16   9   1    3.10    2.00
 -15  -9   1   21.90    4.10
  15  -9  -1   36.50    4.20
 -15   9   1   34.90    3.70
  15   9  -1   29.90    4.40
 -14  -9   1    3.60    2.50
  14  -9  -1    8.80    2.80
 -14   9   1    3.90    1.80
  14   9  -1    4.60    2.50
 -13  -9   1    6.40    2.50
  13  -9  -1   10.40    2.70
  13   9  -1   10.00    2.90
 -13   9   1    9.90    2.20
  12  -9  -1    6.20    2.40
 -12   9   1    3.70    1.80
  12   9  -1    3.70    2.50
  11  -9  -1    4.30    2.20
 -11  -9   1    8.90    2.40
  11   9  -1   11.70    1.90
  11   9  -1   12.40    2.70
 -11   9   1   10.20    1.90
  10  -9  -1    1.90    1.90
 -10  -9   1   -1.20    1.90
 -10   9   1    2.10    1.60
  10   9  -1    2.00    2.10
  10   9  -1    3.30    1.60
   9  -9  -1   66.19    4.80
  -9  -9   1   58.79    4.60
  -9   9   1   67.59    4.30
   9   9  -1   70.29    5.00
   9   9  -1   69.99    4.20
   8  -9  -1   15.60    2.60
   8   9  -1   16.70    2.80
  -8   9   1   19.40    2.50
   8   9  -1   20.90    2.70
   7  -9  -1    2.90    2.00
   7   9  -1    2.90    1.50
  -7   9   1    0.20    1.60
   7   9  -1    4.50    2.30
  -6  -9   1   -2.30    1.60
   6  -9  -1    4.30    2.10
   6   9  -1    2.30    1.50
  -6   9   1    1.20    1.60
   5  -9  -1   40.10    3.80
   5   9  -1   41.30    3.10
   5   9  -1   37.50    3.90
   4  -9  -1   30.20    3.50
  -4   9   1   30.00    2.90
   4   9  -1   32.20    2.80
   4   9  -1   36.90    3.80
   3  -9  -1   81.69    5.20
   3   9  -1   87.99    5.50
  -3   9   1   84.59    4.80
   3   9  -1   80.09    4.80
   2  -9  -1   12.50    2.40
   2   9  -1   12.90    1.90
  -2   9   1   11.60    1.90
  -1  -9   1    3.30    1.90
   1  -9  -1    1.50    2.00
   1   9  -1    4.80    1.60
  -1   9   1    2.70    1.40
   0  -9  -1   35.00    3.60
   0  -9   1   39.20    3.70
   0   9  -1   38.90    3.10
   0   9   1   31.30    2.80
   1  -9   1   27.50    3.10
  -1  -9  -1   25.00    3.40
  -1   9  -1   24.50    2.80
   1   9   1   24.30    2.60
   2  -9   1   39.80    3.70
   2   9   1   35.70    3.00
  -2   9  -1   37.80    3.00
   3  -9   1    7.90    2.00
   3   9   1    8.20    2.40
   3   9   1   14.20    2.20
  -3   9  -1   11.10    1.90
  -4  -9  -1    6.10    2.20
   4  -9   1    5.00    2.10
   4   9   1    4.40    2.30
  -4   9  -1    4.40    1.70
   4   9   1    2.60    1.40
  -5  -9  -1   81.89    4.80
   5   9   1   75.49    5.40
   5   9   1   77.39    4.60
   6  -9   1   44.10    3.90
  -6  -9  -1   43.40    3.60
   6   9   1   39.10    3.20
  -6   9  -1   40.10    3.40
  -7  -9  -1  172.08    8.60
   7  -9   1  154.48    8.60
   7   9   1  153.58    8.10
   7   9   1  163.38    8.80
  -8  -9  -1    3.80    2.10
   8  -9   1    6.30    2.00
   8   9   1    6.70    1.70
   8   9   1    6.50    2.40
  -8   9  -1    7.90    2.00
   9  -9   1   55.19    4.50
  -9  -9  -1   65.79    4.70
   9   9   1   55.69    3.90
  -9   9  -1   57.79    4.00
   9   9   1   56.69    4.80
  10  -9   1    3.50    2.10
 -10  -9  -1    0.40    2.10
  10   9   1    4.40    2.30
  10   9   1    4.70    1.80
 -10   9  -1    2.80    1.70
  11  -9   1   15.20    2.50
 -11  -9  -1   23.90    3.60
  11   9   1   23.10    3.10
 -11   9  -1   22.00    2.90
  11   9   1   25.10    3.70
 -12  -9  -1   -2.30    2.40
  12  -9   1    2.50    2.00
 -12   9  -1    1.50    1.70
  12   9   1    2.80    2.60
  13  -9   1   -0.30    2.00
 -13  -9  -1   -0.30    2.50
  13   9   1    2.90    2.50
 -13   9  -1    2.40    1.80
  14  -9   1    0.60    2.30
 -14  -9  -1   -3.50    2.30
  14   9   1   -2.70    2.40
 -14   9  -1   -0.80    1.90
  15  -9   1    5.40    2.50
 -15  -9  -1    4.30    2.70
 -15   9  -1    4.50    2.10
  15   9   1    5.00    2.70
 -16  -9  -1   15.90    3.30
  16  -9   1   15.60    2.80
 -16   9  -1   24.10    3.10
  16   9   1   20.40    3.50
  17  -9   1   13.70    3.10
 -17  -9  -1    9.50    3.20
  17   9   1   11.50    3.50
 -17   9  -1    8.70    2.70
  18  -9   1    0.40    2.90
 -18  -9  -1    0.20    3.00
  18   9   1   -1.90    3.10
 -18   9  -1    7.20    2.60
  19  -9   1   -1.40    2.70
 -19  -9  -1   -2.60    3.10
  19   9   1   -1.80    3.40
 -19   9  -1   -3.80    2.60
  20  -9   1   24.10    4.20
 -20  -9  -1   12.50    3.70
  20   9   1   24.50    6.80
 -21  -9  -1   -0.70    2.90
  21  -9   1    8.60    3.20
  21   9   1    3.20    4.10
  20 -10  -1    4.10    3.10
  20  10  -1    3.40    3.80
 -19 -10   1   28.30    4.60
  19 -10  -1   52.49    5.30
 -19  10   1   43.20    5.00
  19  10  -1   37.60    7.30
  18 -10  -1    4.80    3.00
 -18 -10   1   -0.90    3.00
  18  10  -1    5.50    3.50
 -18  10   1    3.90    2.50
 -17 -10   1   -1.90    3.00
  17 -10  -1    1.50    2.70
 -17  10   1   -4.10    2.40
  17  10  -1    1.70    3.40
 -16 -10   1   -4.10    2.70
  16 -10  -1    3.80    2.80
 -16  10   1    7.10    2.40
  16  10  -1    0.60    3.10
  15 -10  -1   16.70    3.20
 -15 -10   1   12.40    3.10
 -15  10   1   11.50    2.40
  15  10  -1    7.90    3.10
 -14 -10   1    0.30    2.60
  14 -10  -1    6.80    2.80
  14  10  -1    4.90    2.90
 -14  10   1    4.00    2.00
 -13 -10   1   16.30    3.40
  13 -10  -1   23.10    3.90
 -13  10   1   23.00    3.30
  13  10  -1   22.40    3.60
  12 -10  -1    1.20    2.20
 -12 -10   1   -1.90    2.50
 -12  10   1    3.00    1.90
  12  10  -1    2.80    2.70
 -11 -10   1   86.89    6.10
  11 -10  -1   90.59    6.00
 -11  10   1   92.79    5.50
  11  10  -1   95.99    5.90
  11  10  -1   80.39    6.30
  10 -10  -1  107.09    6.70
  10  10  -1  100.99    7.00
 -10  10   1  104.99    6.20
  10  10  -1  119.29    6.30
   9 -10  -1   68.59    5.10
   9  10  -1   66.79    5.40
   9  10  -1   71.49    4.70
  -9  10   1   71.09    4.60
   8 -10  -1   29.30    3.70
   8  10  -1   34.10    4.00
  -8  10   1   30.30    2.90
   8  10  -1   27.50    3.40
   7 -10  -1   46.60    4.20
   7  10  -1   46.90    4.70
   7  10  -1   57.49    4.00
  -7  10   1   52.39    3.60
   6 -10  -1    9.00    2.40
   6  10  -1    4.70    1.70
   6  10  -1    4.90    2.50
  -6  10   1    4.80    1.70
   5 -10  -1    9.80    2.30
   5  10  -1   10.80    2.50
   5  10  -1   12.20    2.20
  -5  10   1    9.90    1.90
   4 -10  -1   19.90    3.30
   4  10  -1   22.00    3.60
  -4  10   1   17.30    2.40
   3 -10  -1    2.00    2.20
  -3  10   1   -1.40    1.40
   3  10  -1    0.50    2.10
  -2 -10   1   -0.30    2.00
   2 -10  -1   -1.80    1.90
  -2  10   1    0.20    1.50
   2  10  -1   -0.10    1.50
   1 -10  -1   -1.40    2.00
  -1 -10   1   -0.10    2.00
   1  10  -1   -1.60    1.50
  -1  10   1   -0.90    1.50
   0 -10  -1    1.50    2.20
   0 -10   1    1.80    2.00
   0  10   1    1.50    1.60
   0  10  -1    3.40    1.60
   1 -10   1   42.60    4.20
  -1 -10  -1   43.70    4.20
  -1  10  -1   40.50    3.40
   1  10   1   44.20    3.40
   2 -10   1   -0.70    2.00
  -2 -10  -1   -1.20    2.00
   2  10   1    2.50    1.70
  -2  10  -1    0.00    1.50
   3 -10   1   -0.90    2.00
   3  10   1    0.10    1.60
  -3  10  -1    0.00    1.60
   4 -10   1   20.50    3.00
  -4  10  -1   19.90    2.80
   4  10   1   22.10    3.10
   5 -10   1   29.50    3.60
  -5  10  -1   30.20    3.10
   5  10   1   26.70    3.90
   5  10   1   29.60    4.40
   6 -10   1   16.10    2.60
   6  10   1   22.20    3.70
  -6  10  -1   18.30    2.50
   6  10   1   23.90    2.80
   7 -10   1   60.69    4.90
  -7  10  -1   68.79    4.40
   7  10   1   65.19    5.20
   7  10   1   70.09    4.40
   8 -10   1   12.70    2.40
  -8  10  -1   10.40    2.00
   8  10   1   16.00    3.10
   8  10   1   11.30    2.10
   9 -10   1   33.90    3.80
   9  10   1   35.80    4.50
   9  10   1   39.60    3.50
  -9  10  -1   40.50    3.50
 -10 -10  -1    1.10    2.50
  10 -10   1    2.30    2.20
  10  10   1    3.40    2.10
 -10  10  -1    2.30    1.90
  10  10   1    0.30    2.70
  11 -10   1   32.40    4.00
 -11 -10  -1   26.90    4.10
 -11  10  -1   39.20    3.50
  11  10   1   37.30    4.60
 -12 -10  -1    0.20    2.60
  12 -10   1    5.30    2.40
  12  10   1    5.50    3.00
 -12  10  -1    4.90    1.90
  13 -10   1   36.70    4.20
 -13 -10  -1   23.00    4.40
  13  10   1   38.50    4.80
 -13  10  -1   33.10    3.70
 -14 -10  -1   -1.30    2.70
  14 -10   1    1.00    2.50
 -14  10  -1   -2.40    2.10
  14  10   1   -2.30    2.70
 -15 -10  -1    7.40    3.10
  15 -10   1    6.90    2.60
  15  10   1    4.30    3.00
 -15  10  -1    5.90    2.20
  16 -10   1    1.10    2.60
 -16 -10  -1   -6.80    3.00
  16  10   1    0.10    3.20
 -16  10  -1   -1.10    2.30
  17 -10   1   18.50    3.40
 -17 -10  -1    7.90    3.50
  17  10   1   15.40    3.90
 -17  10  -1   15.70    2.70
  18 -10   1    1.80    3.40
 -18 -10  -1   -2.60    3.20
  18  10   1   -0.90    3.40
 -18  10  -1    3.50    2.60
  19 -10   1    0.00    2.90
 -19 -10  -1   -3.30    3.20
  19  10   1   -1.00    3.70
 -19  10  -1   -3.60    2.90
 -18 -11   1   -2.20    3.40
  18 -11  -1    7.50    3.20
 -18  11   1   14.60    3.10
  18  11  -1    3.80    3.50
  17 -11  -1    6.30    5.00
 -17  11   1    4.50    2.40
  17  11  -1   16.70    7.10
  16 -11  -1    2.00    2.90
 -16  11   1   -1.50    2.60
  16  11  -1   -0.50    3.10
  15 -11  -1    1.20    2.70
  15  11  -1    5.90    3.20
 -15  11   1    2.10    2.10
  14 -11  -1    1.40    2.60
 -14  11   1    3.70    2.20
  14  11  -1    3.80    3.20
  13 -11  -1    8.80    2.80
  13  11  -1    6.70    3.20
 -13  11   1    5.50    2.20
  12 -11  -1    3.40    2.60
  12  11  -1    6.20    3.30
 -12  11   1    2.20    2.00
  11 -11  -1   17.30    3.00
  11  11  -1    8.80    3.00
 -11  11   1   10.10    2.20
  10 -11  -1   27.00    4.00
  10  11  -1   26.40    4.50
 -10  11   1   25.60    3.40
  10  11  -1   30.50    3.80
   9 -11  -1   25.00    3.90
  -9  11   1   25.30    3.10
   9  11  -1   27.00    3.80
   9  11  -1   26.20    3.60
   8 -11  -1    2.50    2.50
   8  11  -1    2.00    2.80
  -8  11   1    3.10    1.90
   8  11  -1    0.50    2.00
   7 -11  -1   16.50    3.00
   7  11  -1   16.80    3.30
   7  11  -1   18.10    2.70
  -7  11   1   10.40    2.00
   6 -11  -1    1.40    2.30
  -6  11   1   -1.00    1.50
   6  11  -1   -2.50    2.50
   6  11  -1    0.80    2.00
   5 -11  -1   24.40    3.80
   5  11  -1   27.50    3.20
  -5  11   1   19.40    2.80
   4 -11  -1   18.50    3.00
   4  11  -1   24.30    3.10
  -4  11   1   18.20    2.80
   3 -11  -1    3.60    2.20
  -3 -11   1    6.00    2.40
   3  11  -1    8.50    2.00
  -3  11   1   10.50    2.00
  -2 -11   1   39.80    4.30
   2 -11  -1   39.60    4.20
   2  11  -1   40.50    3.40
  -2  11   1   42.40    3.40
  -1 -11   1   15.50    2.80
   1 -11  -1   14.20    2.70
  -1  11   1   17.60    2.80
   1  11  -1   19.40    2.60
   0 -11  -1  198.48   10.60
   0 -11   1  200.58   10.70
   0  11   1  210.98   10.10
   0  11  -1  192.48   10.00
  -1 -11  -1   10.70    2.60
   1 -11   1   16.90    2.90
  -1  11  -1   16.00    2.30
   1  11   1   13.30    2.20
  -2 -11  -1  168.38    9.30
   2 -11   1  169.68    9.10
  -2  11  -1  162.88    8.50
   2  11   1  163.08    8.50
  -3 -11  -1    7.70    2.60
   3 -11   1    3.60    2.30
  -3  11  -1   10.20    2.10
   3  11   1    9.40    2.10
   4 -11   1    6.90    2.30
  -4  11  -1    8.80    2.00
   4  11   1    9.90    2.10
   5 -11   1   37.30    4.10
  -5  11  -1   34.90    3.40
   5  11   1   44.90    3.60
   6 -11   1   27.10    3.70
   6  11   1   22.50    3.40
  -6  11  -1   20.90    3.10
   6  11   1   24.30    3.20
   7 -11   1    0.60    2.10
   7  11   1   -2.30    2.50
   7  11   1    1.10    1.90
  -7  11  -1   -0.60    1.80
   8 -11   1    2.00    2.40
   8  11   1    1.40    2.00
  -8  11  -1    0.70    1.80
   8  11   1    0.30    2.50
   9 -11   1    1.10    2.20
  -9  11  -1    2.80    1.90
   9  11   1    2.50    2.20
   9  11   1    3.40    2.70
  10 -11   1   14.70    2.80
  10  11   1   15.20    2.70
 -10  11  -1   12.90    2.30
  10  11   1   16.90    3.40
  11 -11   1    2.50    2.30
  11  11   1    0.30    3.00
 -11  11  -1   -2.60    2.00
  12 -11   1    1.10    2.20
  12  11   1   -4.70    3.00
 -12  11  -1    0.20    2.20
 -13 -11  -1   10.80    3.40
  13 -11   1   11.00    2.70
  13  11   1   16.80    3.50
 -13  11  -1   22.80    2.90
  14 -11   1    1.60    2.70
 -14 -11  -1   -5.10    3.00
 -14  11  -1    1.50    2.20
  14  11   1   -2.80    3.00
  15 -11   1   -1.90    2.80
 -15  11  -1    2.10    2.20
  15  11   1    6.10    3.30
  16 -11   1    1.10    3.00
 -16 -11  -1   -4.20    3.10
 -16  11  -1    3.70    2.50
  16  11   1   -1.50    3.20
  17 -11   1    2.20    2.80
 -17 -11  -1   -8.30    3.30
  17  11   1    3.20    4.60
 -17  11  -1    2.50    2.50
  18 -11   1   11.30    3.40
  18  11   1    7.70    3.60
  16 -12  -1    1.70    3.20
 -16  12   1    4.50    2.90
  16  12  -1   -0.60    3.60
  15 -12  -1   31.60    4.60
 -15  12   1   17.50    3.00
  14 -12  -1    4.90    2.90
  14  12  -1    9.10    3.80
 -14  12   1   -2.30    2.30
  13 -12  -1    7.60    3.10
  13  12  -1   10.50    3.60
 -13  12   1    4.50    2.30
  12 -12  -1    1.60    2.60
 -12  12   1    2.00    2.10
  12  12  -1   -1.00    3.00
  11 -12  -1   14.90    2.80
  11  12  -1   17.70    3.80
  10 -12  -1   -0.20    2.30
  10  12  -1    0.90    2.90
 -10  12   1    1.10    2.00
  10  12  -1    2.20    2.50
   9 -12  -1    2.70    2.50
   9  12  -1    4.70    2.50
  -9  12   1    3.30    2.10
   9  12  -1    0.70    3.10
   8 -12  -1   22.80    3.50
   8  12  -1   19.40    3.90
   8  12  -1   19.10    3.00
  -8  12   1   24.60    3.10
   7 -12  -1   24.30    3.60
   7  12  -1   27.40    3.80
  -7  12   1   21.00    3.30
   6 -12  -1   19.30    3.20
  -6  12   1   28.10    3.30
   6  12  -1   23.50    3.80
  -5 -12   1    3.60    2.70
   5 -12  -1    3.00    2.40
   5  12  -1    1.60    2.20
  -5  12   1    2.60    1.90
  -4 -12   1    5.30    2.50
   4 -12  -1    4.90    2.40
   4  12  -1   15.10    2.50
  -4  12   1   10.70    2.10
   3 -12  -1    5.00    2.50
  -3 -12   1    5.50    2.80
   3  12  -1    5.30    2.00
  -3  12   1    5.30    1.90
   2 -12  -1    2.40    2.50
  -2 -12   1    3.40    2.40
  -2  12   1    4.10    1.90
   2  12  -1    4.30    2.00
  -1 -12   1    6.40    2.80
   1 -12  -1    9.90    3.00
  -1  12   1   11.70    2.20
   1  12  -1   10.20    2.20
   0 -12  -1    0.50    2.60
   0 -12   1   -0.50    2.50
   0  12   1    1.30    1.70
   0  12  -1    1.90    1.70
   1 -12   1    5.80    2.40
  -1 -12  -1    7.40    2.60
   1  12   1   12.60    2.20
  -1  12  -1   10.30    2.10
   2 -12   1    0.00    2.30
  -2 -12  -1   -0.10    2.60
  -2  12  -1    0.70    1.80
   2  12   1    3.60    2.10
  -3 -12  -1   16.20    3.00
   3 -12   1   25.30    3.40
  -3  12  -1   26.20    3.30
   3  12   1   34.10    3.70
  -4 -12  -1   16.80    3.30
   4 -12   1   18.20    3.20
   4  12   1   23.10    3.40
  -4  12  -1   14.50    2.30
   5 -12   1    3.50    2.70
  -5 -12  -1    3.40    2.80
   5  12   1    6.20    2.30
  -5  12  -1    1.20    1.80
   6 -12   1    9.70    2.60
  -6  12  -1    9.00    2.10
   6  12   1   21.00    2.90
   7 -12   1    3.80    2.40
   7  12   1    5.40    2.30
  -7  12  -1    1.90    2.00
   8 -12   1    5.30    2.40
   8  12   1   11.10    2.50
   8  12   1   10.80    3.30
  -8  12  -1   10.40    2.40
   9 -12   1    2.40    2.30
   9  12   1    2.90    3.30
  -9  12  -1    5.00    2.00
   9  12   1   -1.00    2.50
  10 -12   1    1.90    2.60
 -10  12  -1    0.20    2.10
  10  12   1    2.70    3.20
  10  12   1    2.20    2.50
  11 -12   1   36.30    4.60
 -11  12  -1   48.10    4.20
  11  12   1   34.00    5.30
  12 -12   1    6.70    2.70
 -12  12  -1    2.60    2.20
  12  12   1    2.80    3.20
  13 -12   1   27.40    4.40
 -13  12  -1   28.00    3.90
  13  12   1   25.20    4.10
  14 -12   1   15.70    4.20
 -14  12  -1   11.00    2.50
  14  12   1   11.90    4.00
  15 -12   1    4.50    3.10
  15  12   1   -1.00    3.70
  16 -12   1   -3.00    2.80
  16  12   1   -0.60    3.40
 -16  12  -1   -1.70    2.50
  14  13  -1    4.00    3.50
  13 -13  -1    8.60    2.90
 -13  13   1    7.00    2.70
  13  13  -1   12.60    4.00
  12 -13  -1    6.80    4.90
  11 -13  -1    6.20    3.00
 -11  13   1   10.00    2.60
  11  13  -1    9.30    3.70
  10 -13  -1    1.70    2.60
  10  13  -1    2.90    3.30
 -10  13   1    3.70    2.30
   9 -13  -1   19.40    3.20
   9  13  -1   18.60    3.30
  -9  13   1   23.80    3.70
   8 -13  -1   56.79    5.50
  -8  13   1   66.19    5.00
   8  13  -1   68.69    5.50
  -7 -13   1   -0.80    2.90
   7 -13  -1    2.20    2.60
   7  13  -1    3.20    2.60
  -7  13   1    3.80    2.20
   6 -13  -1    1.00    2.40
  -6 -13   1   -3.60    2.70
  -6  13   1    0.70    2.00
   6  13  -1    2.00    2.50
   5 -13  -1    2.40    2.80
  -5 -13   1    7.90    3.00
   5  13  -1    8.50    2.60
  -5  13   1    6.00    2.20
  -4 -13   1   -0.40    2.80
   4 -13  -1    0.20    2.60
   4  13  -1   -2.60    2.30
  -4  13   1    1.00    2.10
   3 -13  -1   33.60    4.70
  -3 -13   1   33.90    4.80
  -3  13   1   37.70    3.80
   3  13  -1   36.20    4.20
   2 -13  -1   -1.10    2.70
  -2 -13   1   -0.80    2.60
  -2  13   1   -0.20    2.00
   2  13  -1   -0.90    2.20
   1 -13  -1    7.60    2.70
  -1 -13   1    8.80    3.10
  -1  13   1    8.70    2.30
   1  13  -1   11.80    2.50
   0 -13   1    4.20    2.60
   0 -13  -1    6.80    3.00
   0  13  -1    6.50    2.20
   0  13   1    5.40    2.40
   1 -13   1   13.00    3.30
  -1 -13  -1   11.30    3.10
   1  13   1   16.50    2.80
  -1  13  -1   11.30    2.40
  -2 -13  -1   -0.50    2.80
   2 -13   1    0.40    2.40
  -2  13  -1    2.50    2.20
   2  13   1    3.90    2.30
   3 -13   1   14.50    3.20
  -3 -13  -1   18.60    3.40
   3  13   1   15.60    2.60
  -3  13  -1   14.10    2.50
   4 -13   1    9.40    2.80
  -4 -13  -1    4.60    2.80
   4  13   1    7.90    2.50
  -4  13  -1    1.40    2.00
  -5 -13  -1    8.50    2.90
   5 -13   1    5.70    2.50
   5  13   1   10.00    2.60
  -5  13  -1    7.00    2.20
   6 -13   1    6.30    2.90
  -6 -13  -1    4.80    2.80
  -6  13  -1    5.70    2.20
   6  13   1   11.00    2.80
   7 -13   1   29.40    3.80
   7  13   1   27.70    4.40
  -7  13  -1   27.30    3.70
   8 -13   1    3.60    2.40
   8  13   1    2.30    2.70
  -8  13  -1    6.80    2.40
   9 -13   1    5.60    2.80
   9  13   1    0.20    2.80
  -9  13  -1    5.40    2.40
  10 -13   1   -0.60    2.90
  10  13   1    3.40    3.30
 -10  13  -1    0.30    2.20
  11 -13   1   16.90    4.00
  11  13   1   33.80    5.30
 -11  13  -1   24.20    3.90
  12 -13   1    0.10    2.80
  12  13   1    1.00    4.60
 -12  13  -1    4.00    2.70
  13 -13   1   10.30    3.20
 -13  13  -1    9.80    2.80
  13  13   1    2.10    3.90
  10 -14  -1    3.90    2.70
 -10  14   1   13.20    2.70
  -9 -14   1    2.20    3.00
   9 -14  -1   -3.90    2.80
  -9  14   1    4.30    2.60
   9  14  -1    0.60    3.60
   8 -14  -1    8.20    2.90
  -8 -14   1   13.60    3.90
   8  14  -1    8.10    3.10
  -8  14   1    9.90    2.60
  -7 -14   1    3.20    3.80
   7 -14  -1   -1.30    3.80
   7  14  -1   -1.60    2.70
  -6 -14   1    2.40    3.00
   6 -14  -1    0.60    2.80
   6  14  -1    2.00    2.60
  -6  14   1    1.50    2.40
   5 -14  -1    1.20    2.70
  -5 -14   1   -3.00    2.80
   5  14  -1    1.00    2.70
  -5  14   1    1.60    2.30
   4 -14  -1    1.40    3.00
  -4 -14   1    2.70    3.00
   4  14  -1   -0.50    2.50
  -4  14   1    0.50    2.30
  -3 -14   1    5.90    3.20
   3 -14  -1   10.10    3.20
   3  14  -1   17.50    3.00
  -3  14   1   13.80    2.80
   2 -14  -1   -1.20    2.60
  -2 -14   1   -1.80    2.70
  -2  14   1    0.40    2.10
   2  14  -1   -0.20    2.50
  -1 -14   1   -1.30    2.80
   1 -14  -1   -0.10    3.00
   1  14  -1    2.90    2.80
  -1  14   1    1.20    2.40
   0 -14  -1    5.60    3.00
   0 -14   1   10.90    3.40
   0  14   1   10.40    2.70
   0  14  -1    9.10    2.70
   1 -14   1    1.70    2.70
  -1 -14  -1    2.30    2.80
  -1  14  -1    3.70    2.30
   1  14   1    4.10    2.40
   2 -14   1    1.30    2.90
  -2 -14  -1   -0.10    3.00
  -2  14  -1    1.90    2.40
   2  14   1    2.00    2.40
  -3 -14  -1   -0.90    3.10
   3 -14   1    1.00    2.90
  -3  14  -1    2.30    2.20
   3  14   1    2.10    2.50
   4 -14   1   -2.10    2.70
  -4 -14  -1    0.50    3.20
  -4  14  -1    1.00    2.20
   4  14   1    3.50    2.50
  -5 -14  -1   10.70    3.50
   5 -14   1    6.80    2.80
   5  14   1   12.20    3.00
  -5  14  -1    7.40    2.40
  -6 -14  -1    9.70    3.40
   6 -14   1    6.70    3.40
  -6  14  -1   11.00    3.40
   6  14   1   11.60    2.90
   7 -14   1    4.00    5.00
  -7 -14  -1    3.00    4.50
  -7  14  -1    3.40    3.10
   7  14   1    0.10    2.80
   8 -14   1   32.50    4.60
   8  14   1   37.50    5.10
   9 -14   1    1.00    2.60
  -9 -14  -1    2.10    3.20
  -9  14  -1   -0.60    2.40
 -10  14  -1    8.80    2.50
  -4 -15   1   -0.80    3.10
   4 -15  -1   -0.80    2.60
  -4  15   1    3.80    2.50
   4  15  -1    7.20    2.90
  -3 -15   1   -1.00    2.80
   3 -15  -1   -1.70    3.20
  -3  15   1    1.50    2.50
   3  15  -1    5.70    2.90
  -2 -15   1    0.50    2.80
   2 -15  -1    9.50    3.30
  -2  15   1    7.70    2.80
   2  15  -1    9.70    2.90
   1 -15  -1    2.40    3.00
  -1 -15   1    6.20    3.00
  -1  15   1    5.10    2.70
   1  15  -1    9.40    3.00
   0 -15   1    5.70    3.20
   0 -15  -1    3.00    2.90
   0  15   1    5.90    2.50
   0  15  -1    9.80    2.80
   1 -15   1    2.70    3.20
  -1 -15  -1    0.00    2.90
  -1  15  -1    5.30    2.40
   1  15   1    6.40    2.80
   2 -15   1   -3.70    2.80
  -2 -15  -1    2.00    3.00
   2  15   1    1.60    2.50
  -2  15  -1    3.30    2.70
  -3 -15  -1   14.60    3.30
   3 -15   1    7.30    3.00
   3  15   1   11.20    2.70
  -3  15  -1   11.50    2.90
  27   0  -2   -1.20    2.90
 -27   0   2   -2.80    2.70
 -26   0   2   12.50    2.90
 -25   0   2   -3.00    2.40
  25   0  -2   -1.70    2.50
  24   0  -2    2.50    2.30
 -24   0   2    0.10    2.50
  23   0  -2    3.80    2.20
 -23   0   2    0.00    2.30
  22   0  -2    9.40    2.40
 -22   0   2    9.90    2.40
  21   0  -2    1.50    2.10
 -21   0   2    1.30    2.00
  20   0  -2  192.68    9.60
 -20   0   2  180.38    9.70
 -19   0   2    3.00    1.90
  19   0  -2    1.00    1.80
 -18   0   2   40.00    3.70
  18   0  -2   44.00    3.50
 -17   0   2    1.00    1.70
  16   0  -2   53.79    3.90
 -16   0   2   58.69    4.00
 -15   0   2    0.40    1.40
  15   0  -2   -0.40    1.30
 -14   0   2    3.00    1.50
  14   0  -2    3.30    1.40
 -13   0   2   -0.10    1.20
  13   0  -2   -1.00    1.30
 -12   0   2  244.58   11.80
  12   0  -2  251.07   11.80
 -11   0   2   -0.10    1.10
  11   0  -2    1.30    1.00
 -10   0   2    3.50    0.40
 -10   0   2    2.30    1.10
  10   0  -2    2.40    1.00
  -9   0   2   -0.40    0.20
   9   0  -2   -0.70    0.90
  -9   0   2   -0.20    0.90
  -8   0   2  127.19    5.90
   8   0  -2  136.39    6.40
  -8   0   2  127.09    6.40
   7   0  -2    1.00    0.80
  -7   0   2   -0.10    0.80
  -7   0   2   -0.10    0.20
  -6   0   2   25.20    1.80
   6   0  -2   29.70    1.90
  -6   0   2   28.70    1.30
   5   0  -2    0.40    0.70
  -5   0   2    0.20    0.70
  -5   0   2   -0.10    0.20
  -4   0   2  356.06   16.60
   4   0  -2  372.86   16.60
  -3   0   2    0.60    0.20
  -3   0   2    0.40    0.40
   3   0  -2    0.90    0.50
   2   0  -2 3862.31  176.78
  -2   0   2 3881.41  176.68
  -2   0   2 3839.72  176.48
   2   0  -2 3847.31  176.48
   1   0   2    0.50    0.30
   1   0   2    0.80    0.50
  -1   0  -2    0.40    0.30
   2   0   2 5303.47  250.97
  -2   0  -2 5578.64  251.57
  -2   0  -2 5564.74  251.37
   3   0   2    0.30    0.80
   3   0   2    0.10    0.60
  -3   0  -2    1.20    0.50
   4   0   2    3.30    0.70
   4   0   2    1.20    0.90
   5   0   2   -0.10    0.90
   5   0   2    0.10    0.70
  -5   0  -2    0.90    0.50
   6   0   2  245.78   11.40
  -6   0  -2  241.58   11.10
   6   0   2  246.68   11.60
   7   0   2    0.40    0.90
   7   0   2    0.50    0.90
  -7   0  -2    0.20    0.50
   8   0   2   58.79    3.30
   8   0   2   59.29    3.60
  -8   0  -2   57.69    2.90
   9   0   2    1.10    1.10
   9   0   2    0.10    1.00
  -9   0  -2    0.00    0.50
  10   0   2   -0.10    1.00
 -10   0  -2    0.40    0.60
 -11   0  -2    0.90    0.60
  11   0   2   -0.40    1.20
  12   0   2   51.39    3.40
 -12   0  -2   53.09    2.60
 -12   0  -2   48.90    4.00
 -13   0  -2   -0.80    1.60
  13   0   2   -0.80    1.30
 -14   0  -2   -0.40    1.70
  14   0   2   -0.60    1.40
 -15   0  -2    0.00    1.70
  15   0   2    1.80    1.40
  16   0   2   -0.40    1.60
 -16   0  -2   -0.40    1.80
  17   0   2    3.50    1.70
 -17   0  -2    3.10    1.90
  18   0   2   22.30    3.10
 -18   0  -2   17.90    3.40
  19   0   2    2.50    1.80
 -19   0  -2    0.10    1.90
  20   0   2   53.49    4.10
 -20   0  -2   39.20    4.40
 -21   0  -2    0.40    2.20
  21   0   2    0.30    2.00
  22   0   2    2.90    2.40
 -22   0  -2    3.10    2.40
 -23   0  -2   -1.10    2.40
  23   0   2    0.80    2.10
 -24   0  -2   48.80    5.30
  24   0   2   71.09    5.10
 -25   0  -2   -0.90    2.60
  25   0   2   -1.20    3.60
 -26   0  -2    0.10    2.80
  26   0   2    3.10    2.70
  27  -1  -2    0.90    2.90
 -27  -1   2    2.60    2.80
  27   1  -2    6.70    3.00
 -27   1   2   -0.20    2.70
  26  -1  -2    3.70    4.00
 -26   1   2    0.50    2.80
  26   1  -2    2.40    4.00
 -25  -1   2    7.60    3.00
  25  -1  -2    5.70    2.80
  25   1  -2    7.60    2.90
 -25   1   2    7.30    2.60
  24  -1  -2    2.70    2.60
 -24  -1   2    0.50    2.50
  24   1  -2    4.50    2.40
 -24   1   2    1.70    2.40
 -23  -1   2   29.60    3.80
  23  -1  -2   34.30    3.80
  23   1  -2   35.30    4.00
 -23   1   2   27.00    3.80
 -22  -1   2    1.40    2.10
  22  -1  -2    3.70    2.20
 -22   1   2    0.60    2.20
  22   1  -2    2.50    2.30
  21  -1  -2   35.20    3.70
 -21  -1   2   32.60    3.90
 -21   1   2   29.60    3.70
  21   1  -2   29.80    3.60
 -20  -1   2    3.70    2.00
  20  -1  -2   -0.40    1.80
 -20   1   2    2.90    1.90
  20   1  -2    1.40    1.80
  19  -1  -2   47.50    3.80
 -19  -1   2   46.70    4.00
 -19   1   2   43.10    3.90
  19   1  -2   46.70    3.70
  18  -1  -2   68.99    4.60
 -18  -1   2   74.39    4.80
 -18   1   2   68.19    4.60
  18   1  -2   66.99    4.60
  17  -1  -2   63.29    5.50
 -17   1   2   74.69    4.50
  17   1  -2   53.99    5.50
  16  -1  -2   48.50    3.60
 -16  -1   2   50.39    3.80
 -16   1   2   55.19    3.70
  16   1  -2   44.00    3.50
 -15  -1   2   47.90    3.60
  15  -1  -2   48.90    3.50
 -15   1   2   48.50    3.50
  15   1  -2   44.60    3.30
  14  -1  -2  112.09    6.10
 -14  -1   2  112.49    6.20
 -14   1   2  118.79    5.30
  14   1  -2  107.79    6.00
 -14   1   2  111.19    6.00
 -13  -1   2  211.38   10.20
  13  -1  -2  202.58   10.00
  13   1  -2  209.58   10.00
 -13   1   2  209.08    9.50
 -13   1   2  199.18   10.00
  12  -1  -2   82.39    4.70
 -12  -1   2   86.29    4.90
 -12   1   2   88.69    4.10
 -12   1   2   85.79    4.70
  12   1  -2   85.09    4.70
  11  -1  -2   22.00    2.00
 -11  -1   2   18.00    2.20
 -11   1   2   20.60    2.10
  11   1  -2   21.30    2.20
 -11   1   2   23.00    1.30
  10  -1  -2    7.00    1.20
 -10  -1   2    8.30    1.40
  10   1  -2    8.70    1.30
 -10   1   2    6.90    0.80
 -10   1   2    6.70    1.90
   9  -1  -2  526.85   23.80
  -9  -1   2  509.55   24.00
   9   1  -2  573.34   23.90
  -9   1   2  481.55   23.60
  -9   1   2  491.45   23.30
   8  -1  -2  481.65   22.20
  -8  -1   2  497.15   22.30
   8   1  -2  483.95   22.20
  -8   1   2  506.55   22.00
  -8   1   2  457.35   22.20
   7  -1  -2   32.40    2.30
  -7   1   2   32.80    1.70
  -7   1   2   30.30    2.00
   6  -1  -2  486.45   21.80
  -6  -1   2  489.45   21.80
   6   1  -2  462.95   21.70
  -6   1   2  469.75   21.60
  -6   1   2  479.65   21.70
  -5  -1   2  491.15   22.40
   5  -1  -2  492.25   22.40
  -5   1   2  495.35   22.30
   5   1  -2  495.95   22.40
  -5   1   2  490.95   22.30
  -4  -1   2 9779.52  436.66
  -4  -1   2 9977.10  436.26
   4  -1  -2 9999.00  438.46
   4  -1  -2 9202.88  438.56
  -4   1   2 9260.07  438.46
   4   1  -2 9419.76  435.96
  -4   1   2 9541.05  438.36
  -3  -1   2  141.69    6.30
   3  -1  -2  135.49    6.30
  -3   1   2  140.89    6.30
   3   1  -2  134.19    6.30
  -3   1   2  134.39    6.30
   3   1  -2  131.49    6.20
   2  -1  -2   34.90    1.70
  -2  -1   2   32.10    1.70
  -2   1   2   31.70    1.70
   2   1  -2   31.50    1.70
  -2   1   2   33.70    1.70
   2   1  -2   33.60    1.60
  -1  -1   2   30.10    1.40
   1  -1  -2   30.50    1.50
   1   1  -2   30.20    1.50
   1   1  -2   29.30    1.60
  -1   1   2   27.30    1.50
  -1   1   2   30.10    1.60
   0  -1   2   11.90    0.80
   0   1   2    9.90    0.70
   0   1   2   12.60    1.10
   0   1   2    9.80    0.70
   0   1  -2   12.80    0.80
   1  -1   2  329.07   14.80
   1  -1   2  334.97   14.80
   1   1   2  313.27   14.80
   1   1   2  316.17   14.70
  -1   1  -2  338.17   14.80
   1   1   2  326.37   15.00
   2  -1   2    9.50    1.10
   2  -1   2    6.40    1.00
   2   1   2    9.80    1.40
   2   1   2    7.20    0.80
  -2   1  -2    6.50    0.90
   2   1   2    7.40    0.70
   3  -1   2   60.49    3.20
   3  -1   2   56.79    3.00
   3   1   2   64.99    2.90
   3   1   2   61.89    3.00
  -3   1  -2   59.09    3.00
   3   1   2   58.59    3.40
   4  -1   2  471.85   21.80
   4  -1   2  468.35   21.60
  -4  -1  -2  487.55   21.50
   4   1   2  478.15   21.90
   4   1   2  481.75   21.60
  -4   1  -2  467.05   21.50
   5  -1   2  979.30   43.70
  -5  -1  -2  978.50   43.50
   5  -1   2  964.50   43.80
   5   1   2  989.80   44.00
   5   1   2  912.11   43.60
  -5   1  -2  977.30   43.60
   6  -1   2   99.69    5.00
  -6  -1  -2   96.19    4.50
   6  -1   2  100.39    4.80
  -6   1  -2   96.89    4.70
   6   1   2   95.49    4.80
   7  -1   2   21.50    1.80
  -7  -1  -2   21.00    1.20
   7   1   2   19.20    2.20
   7   1   2   21.10    1.80
  -7   1  -2   21.80    1.50
   8  -1   2  419.06   19.70
  -8  -1  -2  408.66   19.40
   8  -1   2  419.06   19.90
   8   1   2  427.36   19.70
  -8   1  -2  432.36   19.50
   8   1   2  473.55   20.30
  -9  -1  -2  160.58    7.60
   9  -1   2  167.28    8.10
   9   1   2  168.58    8.10
   9   1   2  169.78    8.40
  -9   1  -2  168.38    7.80
 -10  -1  -2   23.70    1.40
  10  -1   2   24.90    2.20
 -10   1  -2   24.90    1.70
  10   1   2   25.10    2.10
  11  -1   2  472.95   21.50
 -11  -1  -2  417.26   20.90
  11   1   2  461.15   21.40
 -11   1  -2  490.35   21.20
 -11   1  -2  481.15   21.70
  12  -1   2   32.80    2.70
 -12   1  -2   31.40    3.10
  12   1   2   33.00    2.60
 -12   1  -2   34.50    2.10
  13  -1   2  383.46   18.80
 -13  -1  -2  414.96   19.20
  13   1   2  397.26   18.80
 -13   1  -2  411.16   18.40
 -13   1  -2  407.46   19.00
 -14  -1  -2  160.98    8.70
  14  -1   2  161.38    8.30
 -14   1  -2  160.98    8.50
  14   1   2  159.88    8.30
 -14   1  -2  176.28    7.80
  15  -1   2   16.20    2.60
 -15  -1  -2   16.20    2.40
 -15   1  -2   16.90    2.90
  15   1   2   20.60    2.60
 -16  -1  -2   22.50    4.00
  16  -1   2   23.90    3.10
 -16   1  -2   28.20    3.40
  16   1   2   31.70    3.00
  17  -1   2   35.20    3.40
 -17  -1  -2   26.80    3.70
 -17   1  -2   30.50    4.20
  17   1   2   31.00    3.20
  18  -1   2    1.60    1.70
 -18  -1  -2    2.80    2.10
  18   1   2    3.50    1.70
 -18   1  -2    1.90    2.00
  19  -1   2   48.00    3.90
 -19  -1  -2   40.30    4.30
 -19   1  -2   43.80    4.20
  19   1   2   45.10    3.80
  20  -1   2   28.60    3.50
 -20  -1  -2   22.90    3.90
  20   1   2   28.20    3.40
 -20   1  -2   26.40    3.70
  21  -1   2    2.10    2.30
 -21  -1  -2    0.10    2.10
 -21   1  -2    0.60    2.20
  21   1   2    3.00    2.00
  22  -1   2    2.60    2.20
 -22  -1  -2    5.30    2.50
  22   1   2    4.90    2.30
 -22   1  -2    2.00    2.40
 -23  -1  -2   -1.10    2.30
  23  -1   2   -2.70    2.10
  23   1   2    0.10    2.50
 -23   1  -2   -0.90    2.40
 -24  -1  -2    1.40    2.60
  24  -1   2    1.90    2.70
 -24   1  -2    2.00    2.50
  24   1   2    2.70    2.50
 -25  -1  -2   -0.40    3.00
 -25   1  -2   -4.10    2.50
  26  -1   2   11.50    2.80
 -26  -1  -2   13.10    3.20
 -26   1  -2    4.20    3.00
  26   1   2   14.30    3.10
 -26  -2   2   13.90    3.00
  26  -2  -2   25.30    3.70
  26   2  -2   21.50    3.40
 -26   2   2   14.10    3.30
 -25  -2   2   44.10    4.60
  25  -2  -2   51.89    4.70
  25   2  -2   47.20    4.80
 -25   2   2   31.20    4.50
  24  -2  -2    4.00    2.60
 -24  -2   2    6.80    2.60
  24   2  -2    4.40    2.70
 -24   2   2    4.70    2.70
  23  -2  -2   65.29    4.80
 -23  -2   2   60.19    4.90
 -23   2   2   49.90    4.80
  23   2  -2   63.49    4.80
  22  -2  -2    8.80    2.30
 -22  -2   2   10.20    2.50
  22   2  -2   14.00    2.70
 -22   2   2    6.70    2.40
  21  -2  -2   34.20    3.70
 -21  -2   2   32.90    4.00
  21   2  -2   33.20    3.70
 -21   2   2   26.00    3.80
  20  -2  -2   30.30    3.60
 -20  -2   2   28.80    3.40
 -20   2   2   28.40    3.60
  20   2  -2   27.20    3.50
  19  -2  -2   21.70    2.70
 -19  -2   2   19.80    3.20
  19   2  -2   25.60    3.30
 -19   2   2   21.30    3.10
 -18  -2   2    1.20    1.80
  18  -2  -2   -1.10    1.80
  18   2  -2    3.20    1.80
 -17  -2   2    6.50    1.90
  17  -2  -2    3.30    1.90
  17   2  -2    4.10    1.70
 -17   2   2    5.40    1.70
 -16  -2   2    3.00    1.90
  16  -2  -2    3.30    1.80
 -16   2   2    1.70    1.50
  16   2  -2    3.60    1.70
 -15  -2   2   11.70    2.10
  15  -2  -2   12.00    2.00
 -15   2   2   16.30    2.40
  15   2  -2   11.60    1.90
 -15   2   2   12.70    1.40
  14  -2  -2  131.29    7.10
 -14  -2   2  135.49    7.20
  14   2  -2  133.19    7.10
 -14   2   2  140.79    6.50
 -14   2   2  135.69    6.90
  13  -2  -2    1.90    1.40
 -13  -2   2    1.60    1.50
 -13   2   2    4.10    0.80
  13   2  -2    2.10    1.40
 -13   2   2    4.10    1.20
  12  -2  -2   34.70    2.70
 -12  -2   2   26.60    2.90
  12   2  -2   35.00    2.70
 -12   2   2   33.30    2.50
 -12   2   2   31.20    2.00
 -11  -2   2   14.80    2.20
  11  -2  -2   19.00    2.10
  11   2  -2   13.80    1.90
 -11   2   2   17.70    1.80
 -11   2   2   15.90    1.40
 -10  -2   2   75.19    4.40
  10  -2  -2   73.49    4.10
 -10   2   2   75.49    4.00
  10   2  -2   69.59    4.10
 -10   2   2   79.39    3.80
  -9  -2   2   34.70    2.70
   9  -2  -2   35.20    2.50
  -9   2   2   35.20    2.20
  -9   2   2   36.40    2.10
   9   2  -2   35.90    2.50
   8  -2  -2 1499.25   68.59
  -8  -2   2 1520.15   68.69
   8   2  -2 1469.65   68.59
  -8   2   2 1589.94   68.49
   7  -2  -2  961.40   43.60
  -7  -2   2  953.50   43.70
  -7   2   2  985.70   43.50
   7   2  -2  952.10   43.60
  -7   2   2 1005.80   43.50
   7   2  -2  925.51   43.30
   6  -2  -2 1804.02   79.89
  -6  -2   2 1800.82   79.89
   6   2  -2 1714.13   79.89
   5  -2  -2  774.62   36.50
  -5  -2   2  801.72   36.50
   5   2  -2  808.22   36.50
   5   2  -2  816.22   36.30
  -5   2   2  821.12   36.30
  -5   2   2  814.22   36.40
   4  -2  -2  187.48    8.80
  -4  -2   2  194.08    8.80
   4   2  -2  190.78    8.70
   4   2  -2  188.08    8.80
  -4   2   2  193.08    8.70
  -4   2   2  182.28    8.70
  -3  -2   2   35.70    1.90
   3  -2  -2   29.80    2.00
   3   2  -2   32.30    1.80
  -3   2   2   30.00    1.80
  -3   2   2   32.60    1.70
   3   2  -2   31.30    1.90
   2  -2  -2   45.20    2.50
  -2  -2   2   47.00    2.30
  -2   2   2   42.70    2.40
   2   2  -2   44.30    2.40
   2   2  -2   45.60    2.50
  -2   2   2   48.50    2.40
   1  -2  -2    8.20    1.00
  -1  -2   2    6.20    0.70
   1   2  -2    3.30    0.90
   1   2  -2    4.90    0.80
   0  -2   2   57.39    2.80
   0   2   2   59.59    3.20
   0   2  -2   59.49    3.10
   0   2   2   59.89    2.90
   0   2  -2   59.19    3.00
   0   2   2   61.59    3.10
   1  -2   2  258.37   11.90
   1  -2   2  273.37   12.10
   1   2   2  264.97   12.00
   1   2   2  255.07   12.00
   1   2   2  261.47   12.20
  -1   2  -2  262.07   12.00
   2  -2   2    1.20    0.80
   2  -2   2    1.60    0.50
  -2   2  -2   -0.10    0.70
   2   2   2    0.70    0.50
   2   2   2    1.80    0.70
   2   2   2    1.00    0.90
   3  -2   2  193.38    8.80
   3  -2   2  187.68    8.90
   3   2   2  193.38    8.90
  -3   2  -2  189.38    8.80
   3   2   2  191.58    8.70
   3   2   2  189.68    9.10
   4  -2   2   17.30    1.40
   4  -2   2   17.10    1.60
  -4   2  -2   19.00    1.40
   4   2   2   17.50    1.90
   4   2   2   20.40    1.50
   4   2   2   20.30    1.20
   5  -2   2  129.39    6.20
   5  -2   2  123.49    6.20
  -5   2  -2  127.89    6.10
   5   2   2  131.59    6.20
   5   2   2  131.39    6.00
   5   2   2  130.49    6.60
   6  -2   2   86.69    4.50
   6  -2   2   88.99    4.50
   6   2   2   82.49    4.80
  -6   2  -2   86.59    4.30
   6   2   2   88.19    4.10
   7  -2   2  128.19    6.40
  -7  -2  -2  132.49    6.00
   7   2   2  124.59    6.70
  -7   2  -2  132.29    6.20
   7   2   2  130.99    6.40
   8  -2   2    2.50    1.00
  -8  -2  -2    3.20    0.50
   8   2   2    2.70    1.30
   8   2   2    2.80    1.20
  -8   2  -2    3.00    0.90
   9  -2   2  429.26   19.80
  -9  -2  -2  403.36   19.30
  -9   2  -2  431.46   19.60
  -9   2  -2  446.96   19.90
   9   2   2  426.66   19.80
   9   2   2  434.46   20.10
  10  -2   2  213.78   10.20
 -10  -2  -2  195.78    9.70
  10   2   2  205.78   10.60
 -10   2  -2  226.08   10.10
 -10   2  -2  220.68   10.40
  10   2   2  225.08   10.30
  11  -2   2   19.80    2.20
 -11   2  -2   17.30    2.40
  11   2   2   21.10    2.20
  12  -2   2   32.20    2.80
  12   2   2   34.60    2.70
 -12   2  -2   31.40    2.90
 -12   2  -2   35.40    2.30
  13  -2   2   60.49    3.90
 -13  -2  -2   56.09    4.80
 -13   2  -2   67.99    3.50
  13   2   2   60.19    3.90
 -13   2  -2   62.59    4.10
 -14  -2  -2    3.20    2.10
  14  -2   2    8.20    1.90
  14   2   2    3.60    1.50
 -14   2  -2    6.80    1.30
 -14   2  -2    3.90    1.60
 -15  -2  -2   19.90    2.90
  15  -2   2   19.70    2.80
 -15   2  -2   23.10    2.10
  15   2   2   16.50    2.60
 -15   2  -2   18.60    2.90
  16  -2   2   27.40    3.10
 -16  -2  -2   27.30    3.60
 -16   2  -2   28.10    3.20
 -17  -2  -2   27.60    3.70
  17  -2   2   30.40    3.10
  17   2   2   29.30    3.20
 -17   2  -2   28.30    3.30
 -18  -2  -2   10.00    2.40
  18  -2   2    6.50    2.00
 -18   2  -2    8.30    2.10
  18   2   2    9.30    2.00
 -19  -2  -2   18.80    2.90
  19  -2   2   11.50    2.30
 -19   2  -2   19.70    3.40
  19   2   2   22.20    3.20
  20  -2   2   34.30    3.60
 -20  -2  -2   29.00    3.90
  20   2   2   37.70    3.70
 -20   2  -2   30.70    3.90
 -21  -2  -2    6.40    2.50
  21  -2   2   10.60    2.30
 -21   2  -2   10.00    2.60
  21   2   2   12.80    2.40
 -22  -2  -2    5.30    2.50
  22  -2   2    8.50    2.40
 -22   2  -2    3.20    2.40
  22   2   2    3.20    2.20
 -23  -2  -2    0.10    2.50
  23  -2   2    2.50    2.40
  23   2   2    0.90    2.40
 -23   2  -2   -1.70    2.40
 -24  -2  -2   12.00    3.00
  24  -2   2   15.10    3.00
 -24   2  -2   10.30    3.00
  24   2   2   20.40    3.30
  25  -2   2   -0.30    3.40
 -25  -2  -2    4.30    3.00
 -25   2  -2   -2.20    2.90
  26  -3  -2    1.20    2.70
 -26  -3   2   -0.90    2.90
 -26   3   2   -3.80    2.90
  26   3  -2    1.90    3.20
 -25  -3   2    1.30    2.60
  25  -3  -2    4.20    2.50
  25   3  -2    5.40    2.90
 -25   3   2    1.70    2.50
  24  -3  -2    9.80    2.70
 -24  -3   2   10.90    2.90
  24   3  -2    9.20    2.80
 -24   3   2    6.80    2.80
 -23  -3   2    2.50    2.30
  23  -3  -2   -2.70    2.10
  23   3  -2   -1.30    2.40
 -23   3   2   -2.90    2.40
  22  -3  -2   46.90    4.40
 -22  -3   2   42.20    4.80
  22   3  -2   49.10    4.50
 -21  -3   2   16.50    3.30
  21  -3  -2    6.70    2.20
  21   3  -2   12.10    2.70
 -21   3   2    7.60    2.30
 -20  -3   2   84.09    5.60
  20  -3  -2   89.89    5.50
  20   3  -2   94.29    5.70
 -20   3   2   87.09    5.50
 -19  -3   2   12.30    2.40
  19  -3  -2   10.70    2.20
  19   3  -2   13.10    2.40
 -19   3   2   12.20    2.30
 -18  -3   2   21.20    3.30
  18  -3  -2   19.20    3.20
  18   3  -2   23.60    3.20
 -18   3   2   25.40    3.00
 -17  -3   2    0.00    1.90
  17  -3  -2    0.10    1.90
 -17   3   2    0.70    1.50
  17   3  -2    1.90    1.90
 -16  -3   2   43.40    4.40
  16  -3  -2   44.00    4.20
 -16   3   2   50.29    3.60
 -16   3   2   53.09    3.20
  16   3  -2   45.20    3.80
  15  -3  -2    0.30    1.60
 -15  -3   2    0.30    1.70
  15   3  -2    2.10    1.50
 -15   3   2    1.10    1.10
 -15   3   2    2.30    1.40
 -14  -3   2  460.85   21.30
  14  -3  -2  433.56   21.10
 -14   3   2  478.45   20.80
 -14   3   2  458.85   21.00
  14   3  -2  431.56   21.10
  13  -3  -2  134.09    7.00
 -13  -3   2  132.99    7.20
  13   3  -2  130.09    7.00
 -13   3   2  131.19    6.70
 -13   3   2  140.79    6.60
  12  -3  -2  354.76   16.70
 -12  -3   2  355.26   16.80
 -12   3   2  365.96   16.40
  12   3  -2  334.07   16.60
 -12   3   2  365.36   16.50
  11  -3  -2  105.39    5.60
 -11  -3   2  102.29    5.80
 -11   3   2  103.29    5.30
 -11   3   2  114.79    5.30
  11   3  -2  106.09    5.70
 -10  -3   2 1100.39   49.60
  10  -3  -2 1073.49   49.40
  10   3  -2 1066.99   49.50
 -10   3   2 1106.09   49.30
 -10   3   2 1099.99   49.30
  -9  -3   2  192.18    9.40
   9  -3  -2  194.38    9.20
   9   3  -2  188.68    9.30
  -9   3   2  194.28    9.00
  -9   3   2  195.78    9.00
   9   3  -2  183.78    8.70
  -8  -3   2  833.52   35.80
   8  -3  -2  767.12   35.50
   8   3  -2  747.63   35.10
   8   3  -2  751.82   35.50
  -8   3   2  771.62   35.40
  -8   3   2  811.92   35.30
   7  -3  -2  172.08    8.30
  -7  -3   2  177.48    8.40
   7   3  -2  175.68    8.30
  -7   3   2  156.38    8.20
  -7   3   2  176.18    8.00
   7   3  -2  171.68    7.90
   6  -3  -2  106.59    5.30
  -6  -3   2   97.19    5.90
  -6   3   2  106.09    5.00
  -6   3   2  104.99    5.10
   6   3  -2  105.59    5.30
   6   3  -2  107.39    5.00
  -5  -3   2   19.20    1.70
   5   3  -2   17.00    1.20
  -5   3   2   15.60    1.10
   5   3  -2   16.30    1.60
  -5   3   2   14.90    1.40
   4  -3  -2  549.54   25.10
  -4  -3   2  566.44   25.00
   4   3  -2  539.55   24.90
  -4   3   2  536.05   25.00
   4   3  -2  541.45   25.10
  -4   3   2  565.14   24.90
   3  -3  -2  501.05   22.50
  -3  -3   2  505.55   22.40
  -3   3   2  507.65   22.40
  -3   3   2  485.95   22.40
   3   3  -2  491.45   22.60
   3   3  -2  469.85   22.40
   2  -3  -2  342.67   15.80
  -2  -3   2  356.66   15.60
   2   3  -2  332.47   15.70
  -2   3   2  340.17   15.70
   2   3  -2  337.17   15.80
  -2   3   2  354.36   15.70
  -1  -3   2  164.38    7.50
   1   3  -2  163.88    7.80
  -1   3   2  161.38    7.70
   1   3  -2  160.78    7.70
  -1   3   2  169.58    7.70
   0   3   2   27.80    1.90
   0   3  -2   25.70    1.70
   0   3   2   25.80    1.60
   0   3  -2   25.90    2.00
   0   3   2   28.60    1.90
   1  -3   2    0.60    0.80
   1   3   2   -0.40    0.80
   1   3   2    0.70    0.80
  -1   3  -2    0.10    0.80
   1   3   2    0.70    0.60
   2  -3   2   61.19    3.30
  -2   3  -2   56.89    3.10
   2   3   2   61.29    3.00
   2   3   2   58.99    3.20
   2   3   2   58.19    3.30
   3  -3   2  650.33   28.60
   3   3   2  616.94   28.80
   3   3   2  640.14   28.60
   3   3   2  625.34   28.40
  -3   3  -2  611.74   28.50
   4  -3   2  158.78    8.60
  -4   3  -2  185.58    8.40
   4   3   2  180.58    8.50
   4   3   2  184.38    8.30
   4   3   2  182.78    8.70
   5  -3   2    8.00    1.20
  -5   3  -2    8.40    1.30
   5   3   2    8.90    1.50
   5   3   2    8.40    0.90
   6  -3   2  640.94   28.90
   6   3   2  618.04   29.10
   6   3   2  631.04   28.80
  -6   3  -2  634.54   28.80
   6   3   2  642.24   28.60
  -6   3  -2  627.54   28.70
   7  -3   2   44.20    2.80
  -7   3  -2   42.80    2.50
   7   3   2   40.50    2.70
   7   3   2   41.20    2.20
  -7   3  -2   43.40    2.60
   8  -3   2  232.38   10.50
  -8   3  -2  219.38   10.30
  -8   3  -2  192.68   10.50
   8   3   2  217.28   10.50
   8   3   2  235.18   10.10
   8   3   2  223.78   10.90
   9  -3   2   10.70    1.50
  -9  -3  -2   12.70    1.10
  -9   3  -2    8.80    1.40
   9   3   2   12.70    2.30
   9   3   2   13.50    1.80
  -9   3  -2    8.80    1.70
 -10  -3  -2  233.68   10.90
  10  -3   2  236.98   11.40
  10   3   2  235.88   11.80
 -10   3  -2  247.88   11.30
  10   3   2  241.48   11.40
  11  -3   2    0.30    1.30
 -11   3  -2    1.70    1.00
  11   3   2    0.10    1.20
 -11   3  -2   -0.40    1.00
  12  -3   2   53.89    3.60
 -12   3  -2   54.59    3.50
  12   3   2   52.39    3.60
 -13  -3  -2   -1.60    2.10
  13  -3   2    2.60    1.50
 -13   3  -2    1.00    1.40
 -13   3  -2    2.80    1.20
  13   3   2    0.30    1.50
  14  -3   2  137.59    7.30
 -14  -3  -2  135.39    7.80
  14   3   2  134.39    7.30
 -14   3  -2  145.79    6.90
 -14   3  -2  135.89    7.20
 -15  -3  -2   16.60    3.20
  15  -3   2   18.30    2.80
 -15   3  -2   14.70    2.70
 -15   3  -2   18.20    2.20
  15   3   2   16.00    2.70
  16  -3   2   35.70    3.60
 -16  -3  -2   39.50    4.20
 -16   3  -2   45.30    3.50
  16   3   2   36.30    3.50
 -17  -3  -2    1.70    2.20
  17  -3   2    2.10    1.90
  17   3   2    1.10    1.80
 -17   3  -2    4.10    1.90
 -18  -3  -2   72.49    5.50
  18  -3   2   81.79    5.30
 -18   3  -2   85.39    5.30
  18   3   2   82.19    5.30
 -19  -3  -2   -0.40    2.10
  19  -3   2    0.90    2.10
 -19   3  -2    1.80    2.10
  19   3   2    0.90    2.10
  20  -3   2   -0.60    2.00
 -20  -3  -2   -1.20    2.20
  20   3   2    2.00    2.20
 -20   3  -2    1.10    2.10
  21  -3   2    0.00    2.20
 -21  -3  -2   -0.40    2.20
  21   3   2   -2.40    2.20
 -21   3  -2   -1.00    2.10
 -22  -3  -2    6.70    2.60
  22  -3   2    4.10    2.30
  22   3   2    1.40    2.30
 -22   3  -2    1.90    2.40
 -23  -3  -2    5.80    2.60
  23  -3   2    3.60    2.50
 -23   3  -2   -0.50    2.60
  23   3   2    6.70    2.60
  24  -3   2   15.70    3.00
 -24  -3  -2    9.70    2.90
 -24   3  -2    5.90    3.00
  24   3   2   10.60    2.90
  25  -3   2    0.10    2.90
 -25  -3  -2    1.90    2.70
 -25   3  -2   -3.10    2.50
  25   3   2   -0.10    2.90
 -26  -4   2   16.30    3.40
  26  -4  -2   16.90    3.10
  26   4  -2   28.30    4.00
 -25  -4   2   44.10    5.90
  25  -4  -2   41.60    6.40
  24  -4  -2    2.30    2.60
 -24  -4   2    1.60    2.70
  24   4  -2    8.20    2.90
 -24   4   2    1.50    2.60
 -23  -4   2   38.90    4.30
  23  -4  -2   51.79    4.50
  23   4  -2   53.39    4.70
 -23   4   2   33.00    4.30
 -22  -4   2    2.70    2.40
  22  -4  -2    2.30    2.50
 -22   4   2    2.40    2.30
  22   4  -2    4.30    2.80
 -21  -4   2   10.50    2.70
  21  -4  -2    8.80    2.70
  21   4  -2    5.40    2.50
 -21   4   2    5.40    2.30
 -20  -4   2    2.40    2.00
  20  -4  -2    1.60    2.10
 -20   4   2   -0.60    2.10
  20   4  -2    2.20    2.40
  19  -4  -2    5.90    2.20
 -19  -4   2    6.00    2.20
  19   4  -2    8.00    2.30
 -19   4   2    6.40    2.20
  18  -4  -2    5.60    2.30
 -18  -4   2    5.00    2.20
 -18   4   2    2.10    1.90
  18   4  -2    7.50    2.20
 -17  -4   2    1.20    1.90
  17  -4  -2   -1.80    1.70
  17   4  -2    1.80    2.00
 -17   4   2    0.60    1.50
 -17   4   2   -0.30    1.60
 -16  -4   2    0.50    1.90
  16  -4  -2    5.40    2.00
 -16   4   2    3.30    1.60
  16   4  -2    1.60    1.90
 -16   4   2    3.70    1.30
 -15  -4   2    4.30    2.00
  15  -4  -2    8.70    1.80
 -15   4   2    4.20    1.30
 -15   4   2    4.80    1.50
  15   4  -2    6.30    1.80
  14  -4  -2    3.30    1.60
 -14  -4   2    1.30    1.90
 -14   4   2    2.40    1.10
 -14   4   2    2.90    1.30
  14   4  -2    4.80    1.80
  13  -4  -2   63.89    4.30
 -13  -4   2   60.69    4.40
 -13   4   2   69.99    3.80
 -13   4   2   67.79    3.90
  13   4  -2   66.79    4.30
 -12  -4   2    3.90    1.70
  12  -4  -2    6.40    1.60
 -12   4   2    6.30    1.30
  12   4  -2    4.90    1.60
 -12   4   2    5.40    1.30
 -11  -4   2  117.09    6.30
  11  -4  -2  112.99    6.20
 -11   4   2  125.79    5.90
  11   4  -2  108.39    6.10
  11   4  -2  118.39    5.50
  10  -4  -2    1.20    1.30
 -10  -4   2    0.90    1.30
 -10   4   2    0.80    0.90
  10   4  -2    4.00    1.40
 -10   4   2    3.50    1.00
  10   4  -2    2.50    0.60
  -9  -4   2    8.40    1.60
   9  -4  -2    9.60    1.60
   9   4  -2   12.90    1.80
  -9   4   2   11.90    1.60
   9   4  -2    9.50    1.00
  -9   4   2   12.90    1.80
   8  -4  -2  102.19    5.40
  -8  -4   2  104.09    5.50
  -8   4   2  104.89    5.00
   8   4  -2  104.99    5.00
   8   4  -2  104.29    5.50
  -7  -4   2   30.30    2.40
   7  -4  -2   30.10    2.30
  -7   4   2   30.40    2.10
  -7   4   2   27.10    1.80
   7   4  -2   30.10    1.80
   7   4  -2   31.90    2.40
  -6  -4   2  124.89    6.10
   6   4  -2  125.29    5.80
  -6   4   2  119.39    5.80
  -6   4   2  112.29    5.90
   6   4  -2  125.59    6.30
  -5  -4   2  227.48   10.20
   5  -4  -2  223.78   10.30
  -5   4   2  221.78   10.00
  -5   4   2  202.28   10.10
   5   4  -2  209.58   10.30
   5   4  -2  213.98   10.00
   4  -4  -2  456.85   20.70
  -4  -4   2  453.95   20.50
   4   4  -2  437.26   20.70
  -4   4   2  456.55   20.40
   4   4  -2  436.06   20.40
  -4   4   2  449.06   20.50
   3  -4  -2 1672.23   73.59
  -3  -4   2 1660.43   73.29
   3   4  -2 1591.04   73.59
   3   4  -2 1553.94   73.39
  -3   4   2 1665.23   73.29
  -2  -4   2    6.80    0.70
  -2   4   2    4.80    1.00
   2   4  -2    5.60    1.30
  -2   4   2    7.50    1.00
   2   4  -2    6.20    1.00
  -1  -4   2  328.57   14.80
  -1   4   2  342.97   15.00
  -1   4   2  320.87   15.10
   1   4  -2  320.77   15.20
   1   4  -2  321.47   15.10
   0   4   2  146.29    6.90
   0   4   2  149.29    6.80
   0   4  -2  124.99    6.90
   0   4  -2  142.19    6.90
   1  -4   2   14.10    1.70
  -1   4  -2    8.80    1.50
   1   4   2   13.80    1.50
   1   4   2   11.70    1.60
   1   4   2    8.80    1.10
   2  -4   2  626.74   26.90
   2   4   2  554.34   27.00
   2   4   2  570.14   26.70
   2   4   2  616.74   26.90
  -2   4  -2  568.74   26.70
   3  -4   2  302.17   13.80
   3   4   2  293.37   13.50
  -3   4  -2  281.37   13.60
   3   4   2  299.37   13.80
   3   4   2  293.07   13.70
   4  -4   2   82.19    4.40
   4   4   2   79.39    4.50
   4   4   2   83.89    4.00
   4   4   2   80.19    4.30
  -4   4  -2   80.79    3.80
  -4   4  -2   79.99    4.20
   5  -4   2    1.90    1.30
   5   4   2    2.90    1.20
   5   4   2    2.50    1.00
   5   4   2    3.20    0.70
  -5   4  -2    1.70    0.60
  -5   4  -2    0.90    1.00
   6  -4   2   82.39    4.50
  -6   4  -2   83.29    4.00
   6   4   2   80.79    4.40
  -6   4  -2   83.99    4.50
   6   4   2   80.69    4.70
   6   4   2   78.69    4.00
   7  -4   2  106.19    5.50
  -7   4  -2  111.59    5.10
   7   4   2  103.49    5.50
  -7   4  -2  102.69    5.30
   7   4   2  100.09    5.00
   7   4   2  104.69    5.70
   8  -4   2   72.49    4.20
   8   4   2   75.49    3.70
   8   4   2   74.69    4.60
  -8   4  -2   73.69    4.00
   8   4   2   76.79    4.30
  -8   4  -2   75.79    3.90
   9  -4   2  170.28    8.60
   9   4   2  170.28    8.60
   9   4   2  172.48    8.90
  -9   4  -2  176.88    8.30
  -9   4  -2  172.38    8.40
   9   4   2  176.88    8.10
  10  -4   2   33.20    2.70
  10   4   2   31.80    2.80
 -10   4  -2   36.00    2.40
 -10   4  -2   33.00    2.50
  11  -4   2    3.40    1.60
 -11  -4  -2    4.10    0.80
 -11   4  -2    5.20    1.30
  11   4   2    4.60    1.60
 -11   4  -2    3.00    1.10
  12  -4   2   43.80    3.30
 -12   4  -2   44.60    3.00
  12   4   2   47.30    3.50
 -12   4  -2   42.50    3.10
 -13  -4  -2   17.20    3.00
  13  -4   2   23.70    2.60
  13   4   2   21.10    2.70
 -13   4  -2   21.70    2.30
 -13   4  -2   20.10    2.40
 -14  -4  -2   20.60    3.80
  14  -4   2   30.80    2.90
 -14   4  -2   29.60    2.60
  14   4   2   28.60    3.20
 -14   4  -2   27.80    2.80
  15  -4   2  118.19    6.50
 -15  -4  -2  109.89    7.00
 -15   4  -2  112.89    6.20
 -15   4  -2  116.19    6.10
 -16  -4  -2    1.10    2.30
  16  -4   2    3.90    1.90
 -16   4  -2    3.40    1.70
 -16   4  -2    4.40    1.60
  16   4   2    2.90    2.00
  17  -4   2   -0.20    1.80
 -17  -4  -2   -1.40    2.10
 -17   4  -2   -0.20    1.80
  17   4   2    1.30    2.00
 -18  -4  -2    5.40    2.40
  18  -4   2   11.20    2.50
 -18   4  -2    8.20    2.10
  18   4   2   10.10    2.50
 -19  -4  -2    2.10    2.30
  19  -4   2    0.50    2.10
  19   4   2    1.20    2.20
 -19   4  -2   -0.20    1.90
  20  -4   2   24.60    3.70
 -20  -4  -2   20.70    3.70
 -20   4  -2   17.30    2.80
  20   4   2   23.60    3.90
  21  -4   2    1.70    2.50
 -21  -4  -2    0.20    2.30
  21   4   2    1.30    2.50
  22  -4   2    5.90    2.70
 -22  -4  -2    3.60    2.70
  22   4   2    5.50    2.70
 -22   4  -2   -1.20    2.50
  23  -4   2   15.10    3.10
 -23  -4  -2   14.10    3.30
  23   4   2   18.00    3.30
 -23   4  -2    6.50    2.90
  24  -4   2   -3.90    3.80
 -24   4  -2   -5.30    3.00
  24   4   2    0.10    3.00
 -25  -4  -2   12.60    3.00
  25  -4   2   12.10    3.10
 -25   4  -2    3.80    3.40
  25   4   2   20.90    3.80
 -25  -5   2    5.90    3.00
  25  -5  -2    6.50    3.00
  25   5  -2   11.10    3.50
 -24  -5   2    5.40    2.90
  24  -5  -2    6.10    2.70
  24   5  -2    5.20    3.20
 -24   5   2   10.60    3.20
  23  -5  -2    8.70    2.90
 -23  -5   2    6.40    2.80
  23   5  -2    9.30    3.00
 -23   5   2   11.40    2.90
 -22  -5   2   20.60    3.80
  22  -5  -2   28.20    3.70
  22   5  -2   19.20    3.60
 -22   5   2   26.60    4.00
  21  -5  -2   40.20    4.30
 -21  -5   2   35.40    4.20
  21   5  -2   38.10    4.40
 -21   5   2   32.10    3.90
 -20  -5   2    1.60    2.30
  20  -5  -2    3.30    2.40
 -20   5   2    2.30    2.20
  20   5  -2    6.10    2.60
 -19  -5   2   45.30    4.40
  19  -5  -2   46.30    4.30
  19   5  -2   45.20    4.50
 -19   5   2   43.60    4.00
 -18  -5   2   43.50    4.10
  18  -5  -2   47.70    4.10
  18   5  -2   41.40    4.20
 -18   5   2   42.30    3.70
  17  -5  -2   26.50    3.50
 -17  -5   2   26.50    3.50
  17   5  -2   33.40    3.70
 -17   5   2   28.80    3.00
 -17   5   2   25.10    3.00
  16  -5  -2   -1.00    1.90
 -16  -5   2    0.30    2.00
 -16   5   2    2.10    1.40
  16   5  -2    1.20    1.90
 -16   5   2   -2.90    1.40
  15  -5  -2   74.59    5.10
  15   5  -2   82.19    5.20
 -15   5   2   76.19    4.50
 -15   5   2   82.89    4.60
  14  -5  -2    3.10    1.80
 -14  -5   2    2.40    1.80
 -14   5   2   -1.10    1.20
  14   5  -2   -0.40    1.60
 -14   5   2   -0.80    1.30
 -13  -5   2  186.48    9.60
  13  -5  -2  181.28    9.50
 -13   5   2  191.58    9.10
  13   5  -2  181.88    9.50
 -13   5   2  199.58    9.20
 -12  -5   2   42.30    3.60
  12  -5  -2   42.40    3.50
  12   5  -2   41.60    3.40
 -12   5   2   44.00    2.80
 -12   5   2   43.30    3.00
 -11  -5   2   17.50    2.70
  11  -5  -2   17.40    2.60
  11   5  -2   22.80    1.50
 -11   5   2   17.70    2.10
  11   5  -2   15.10    2.60
 -11   5   2   21.20    1.90
 -10  -5   2   14.10    2.50
  10  -5  -2   17.60    2.50
  10   5  -2   14.70    2.40
 -10   5   2   17.10    1.60
  10   5  -2   16.00    1.40
 -10   5   2   14.30    1.90
  -9  -5   2   30.80    2.80
   9  -5  -2   28.10    2.80
  -9   5   2   33.40    2.40
   9   5  -2   28.90    2.00
  -9   5   2   32.30    2.10
   9   5  -2   34.60    2.90
  -8  -5   2  188.38    8.90
   8  -5  -2  180.78    8.90
   8   5  -2  174.88    8.50
  -8   5   2  176.88    8.50
  -8   5   2  184.68    8.70
   8   5  -2  174.18    8.90
   7  -5  -2   74.29    4.30
  -7   5   2   70.09    4.00
  -7   5   2   77.19    3.80
   7   5  -2   74.99    4.40
   6  -5  -2   66.49    4.00
  -6  -5   2   67.09    3.80
   6   5  -2   65.29    3.50
  -6   5   2   70.69    3.50
  -6   5   2   64.49    3.70
   6   5  -2   68.09    3.90
  -5  -5   2  121.49    6.30
   5  -5  -2  119.49    6.20
  -5   5   2  116.29    6.00
  -5   5   2  123.89    5.80
   5   5  -2  123.49    5.90
   5   5  -2  122.29    6.30
  -4  -5   2   10.40    1.50
   4  -5  -2   14.40    1.90
   4   5  -2   11.50    1.80
  -4   5   2   13.30    1.50
   4   5  -2   11.30    1.40
  -3  -5   2   58.39    3.00
   3   5  -2   53.59    3.50
   3   5  -2   51.89    3.10
  -3   5   2   53.89    3.10
  -3   5   2   59.29    2.90
  -2  -5   2   48.40    2.60
   2  -5  -2   52.59    3.30
   2   5  -2   50.19    3.40
   2   5  -2   45.60    2.90
  -2   5   2   52.59    2.70
  -2   5   2   54.79    3.20
  -1  -5   2  304.97   14.20
   1  -5  -2  324.47   14.80
   1   5  -2  299.17   14.50
  -1   5   2  316.77   14.70
  -1   5   2  323.77   14.50
   0   5   2   16.60    1.50
   0   5   2   17.70    2.00
   0   5   2   13.90    1.60
   0   5  -2   13.30    1.50
   1  -5   2    1.50    1.30
   1   5   2    1.50    0.90
   1   5   2    0.90    0.80
  -1   5  -2    0.80    1.50
   1   5   2    2.00    1.20
   2  -5   2  150.78    7.30
   2   5   2  143.49    7.20
   2   5   2  135.99    7.00
  -2   5  -2  149.49    7.10
   2   5   2  150.38    7.30
   3  -5   2  438.36   20.40
   3   5   2  446.36   20.10
  -3   5  -2  435.96   20.20
   3   5   2  435.46   20.30
   4  -5   2   49.40    3.20
   4   5   2   46.80    3.10
   4   5   2   46.00    3.10
   4   5   2   44.50    2.60
  -4   5  -2   45.70    2.90
   5  -5   2  113.09    5.80
   5   5   2  110.29    5.50
   5   5   2  114.99    5.90
  -5   5  -2  114.89    5.70
   5   5   2  108.59    5.80
   6  -5   2    1.20    1.30
  -6   5  -2    2.20    1.10
   6   5   2    1.00    0.70
   6   5   2    1.50    1.30
   6   5   2    1.60    1.20
  -6   5  -2    1.20    0.60
   7  -5   2  108.99    5.60
   7   5   2  103.59    5.20
   7   5   2  110.99    5.90
  -7   5  -2  109.69    5.10
  -7   5  -2  105.59    5.50
   7   5   2  100.69    5.60
   8  -5   2   77.69    4.30
  -8   5  -2   66.49    4.00
   8   5   2   64.79    4.20
  -8   5  -2   74.69    3.70
   8   5   2   70.79    4.50
   9  -5   2  195.78    9.50
  -9   5  -2  193.88    9.00
   9   5   2  193.08    9.50
  -9   5  -2  189.48    9.30
   9   5   2  185.68    9.00
  10  -5   2   55.59    3.80
 -10   5  -2   55.29    3.20
  10   5   2   53.49    3.80
 -10   5  -2   55.19    3.50
  10   5   2   57.59    3.10
  11  -5   2   90.39    5.40
  11   5   2   91.99    4.70
 -11   5  -2   98.29    4.90
  11   5   2   91.39    5.40
 -11   5  -2   92.49    5.10
 -12  -5  -2   48.60    4.60
  12  -5   2   53.79    3.90
 -12   5  -2   54.09    3.40
 -12   5  -2   55.59    3.60
  12   5   2   54.79    3.80
  13  -5   2  110.39    6.20
 -13  -5  -2  111.39    6.80
  13   5   2  106.39    6.30
 -13   5  -2  110.99    5.80
 -13   5  -2  112.69    6.00
  14  -5   2   11.20    2.10
 -14   5  -2   10.70    1.70
 -14   5  -2    9.30    1.70
  15  -5   2  103.49    5.90
 -15  -5  -2   89.19    6.50
 -15   5  -2  102.09    5.60
  15   5   2   99.99    6.00
 -15   5  -2   97.69    5.60
  16  -5   2   19.50    3.30
 -16  -5  -2   21.40    3.30
 -16   5  -2   15.20    2.80
 -16   5  -2   20.10    2.80
  16   5   2   21.40    3.40
  17  -5   2    4.60    2.20
 -17  -5  -2    0.50    2.30
 -17   5  -2    3.30    2.00
  17   5   2    3.20    2.30
 -17   5  -2   10.70    2.10
  18  -5   2   26.80    3.70
 -18  -5  -2   22.80    3.40
  18   5   2   23.50    3.80
  19  -5   2   47.30    4.30
 -19  -5  -2   36.50    4.30
  19   5   2   34.60    4.20
 -19   5  -2   26.30    3.80
  20  -5   2    9.60    2.60
 -20  -5  -2    6.60    2.70
  20   5   2   14.00    2.90
 -20   5  -2    6.90    2.70
  21  -5   2   -0.50    2.40
 -21  -5  -2    2.90    2.50
  21   5   2   -0.80    2.90
 -22  -5  -2    5.80    2.70
  22  -5   2    6.40    2.90
  22   5   2    5.40    3.00
 -23  -5  -2    2.90    2.70
  23  -5   2    5.10    2.70
 -23   5  -2   -3.00    3.60
  23   5   2    3.90    3.10
 -24  -5  -2    0.10    3.00
  24  -5   2    1.60    2.90
  24   5   2    5.50    3.30
  24  -6  -2   46.80    4.90
 -24  -6   2   34.50    4.70
  24   6  -2   33.90    5.30
  23  -6  -2    2.30    2.80
 -23  -6   2   -0.50    2.80
  23   6  -2    3.70    3.10
 -22  -6   2    1.70    2.60
  22  -6  -2    3.40    2.80
  22   6  -2    1.70    3.10
 -21  -6   2   20.90    4.10
  21  -6  -2   26.30    3.60
  21   6  -2   23.30    3.50
  20  -6  -2    6.80    2.50
 -20  -6   2    7.60    2.80
 -20   6   2   15.50    3.30
  20   6  -2    7.20    2.60
  19  -6  -2    1.90    2.30
 -19  -6   2   -0.30    2.30
  19   6  -2    2.70    2.30
 -18  -6   2   24.50    3.70
  18  -6  -2   27.30    3.90
  18   6  -2   23.70    3.90
 -18   6   2   33.60    3.50
 -18   6   2   25.00    2.90
 -17  -6   2    0.40    2.10
  17  -6  -2    1.60    2.10
 -17   6   2    7.00    1.90
  17   6  -2    0.10    2.30
 -17   6   2    2.70    1.70
 -16  -6   2    0.50    2.00
  16  -6  -2   -2.20    2.00
 -16   6   2    2.80    1.60
 -16   6   2   -0.50    1.50
  16   6  -2   -0.60    1.90
 -15  -6   2    7.10    2.20
  15  -6  -2    7.50    2.30
  15   6  -2    7.70    2.30
 -15   6   2    6.70    1.70
 -15   6   2   14.90    2.40
 -14  -6   2   15.30    2.50
  14  -6  -2   15.30    2.50
 -14   6   2   13.70    1.90
  14   6  -2   14.20    2.60
  13  -6  -2   -2.70    1.80
 -13  -6   2   -0.50    1.70
 -13   6   2   -0.50    1.30
  13   6  -2    1.00    2.00
 -12  -6   2   41.70    3.70
  12  -6  -2   42.50    3.50
 -12   6   2   52.19    3.10
 -12   6   2   42.60    3.20
  12   6  -2   40.80    3.70
 -11  -6   2   10.70    2.10
  11  -6  -2   11.80    2.10
  11   6  -2   10.30    2.10
 -11   6   2   10.20    1.70
  11   6  -2    8.90    1.90
  10  -6  -2   23.80    2.80
 -10  -6   2   23.10    2.90
 -10   6   2   32.70    2.20
  10   6  -2   24.20    3.00
  10   6  -2   25.50    2.00
 -10   6   2   23.30    2.40
   9  -6  -2    2.10    1.50
  -9  -6   2   -0.40    1.40
   9   6  -2    1.00    0.90
   9   6  -2    3.30    1.70
  -9   6   2    0.90    1.20
   8  -6  -2  258.17   12.40
  -8  -6   2  275.27   12.60
  -8   6   2  243.18   12.20
   8   6  -2  251.87   12.00
  -8   6   2  259.67   12.00
   8   6  -2  257.77   12.50
   7  -6  -2    1.30    1.50
  -7  -6   2    3.70    1.20
   7   6  -2    3.50    1.60
   7   6  -2    3.30    1.00
  -7   6   2    2.00    1.20
   6  -6  -2  466.45   21.80
  -6  -6   2  491.85   21.60
   6   6  -2  476.95   21.90
  -6   6   2  477.95   21.40
   6   6  -2  445.36   21.70
  -6   6   2  448.56   21.60
   5  -6  -2   -0.50    1.20
  -5  -6   2    0.20    0.90
   5   6  -2   -1.20    0.80
   5   6  -2    0.70    1.40
  -5   6   2   -0.20    1.00
  -4  -6   2  267.07   11.80
   4  -6  -2  242.98   12.10
   4   6  -2  262.87   12.30
  -4   6   2  245.18   12.00
   4   6  -2  248.38   11.90
  -3  -6   2  129.19    6.20
   3  -6  -2  132.89    6.80
  -3   6   2  132.89    6.40
   3   6  -2  124.19    6.80
   3   6  -2  130.49    6.40
   2  -6  -2 1173.78   52.39
  -2  -6   2 1211.78   51.89
   2   6  -2 1108.89   52.19
  -2   6   2 1095.59   52.19
   2   6  -2 1174.08   52.49
  -1  -6   2   19.40    1.20
   1  -6  -2   18.80    2.40
   1   6  -2   16.30    2.50
   1   6  -2   21.80    1.80
  -1   6   2   20.00    1.80
  -1   6   2   20.60    1.60
   0   6   2    3.40    1.00
   0   6   2    3.60    1.10
   0   6  -2    3.90    1.10
   1  -6   2    2.50    1.40
  -1   6  -2    4.20    1.10
   1   6   2    2.60    0.90
   1   6   2    2.00    0.90
   1   6   2    1.40    1.30
   2  -6   2  188.28    9.40
   2   6   2  188.48    9.10
   2   6   2  191.88    9.20
  -2   6  -2  195.38    9.20
   2   6   2  191.08    9.40
   3  -6   2   37.70    2.90
   3   6   2   41.10    2.50
   3   6   2   41.90    3.10
   3   6   2   38.70    2.70
  -3   6  -2   39.10    2.70
   4  -6   2   48.00    3.20
  -4   6  -2   44.70    3.00
   4   6   2   45.10    2.70
   4   6   2   44.70    3.10
   4   6   2   43.80    3.10
   5  -6   2    1.60    1.30
  -5   6  -2    2.20    1.20
   5   6   2    0.70    1.20
   5   6   2    1.60    0.90
   5   6   2    3.00    1.40
   6  -6   2   42.40    3.20
   6   6   2   37.50    2.50
   6   6   2   40.60    3.20
   6   6   2   46.00    3.20
  -6   6  -2   39.30    2.80
   7  -6   2   61.79    4.00
  -7   6  -2   61.29    3.70
   7   6   2   67.09    4.10
   7   6   2   54.69    3.50
   8  -6   2  166.58    8.20
   8   6   2  155.88    7.80
  -8   6  -2  162.88    8.00
  -8   6  -2  155.68    7.40
   8   6   2  155.48    8.20
   9  -6   2   61.49    4.00
   9   6   2   57.59    4.00
  -9   6  -2   55.79    3.70
  -9   6  -2   55.19    3.10
   9   6   2   59.19    3.30
  10  -6   2    4.50    1.70
  10   6   2    5.80    1.10
 -10   6  -2    5.30    1.50
  10   6   2    3.10    1.60
 -10   6  -2    2.80    1.10
  11  -6   2    6.30    1.80
 -11  -6  -2    5.80    2.40
  11   6   2    3.60    1.80
 -11   6  -2    4.90    1.30
 -11   6  -2    9.60    1.80
  11   6   2    6.00    1.20
  12  -6   2    6.80    2.00
 -12  -6  -2    7.60    2.40
 -12   6  -2    5.70    1.70
  12   6   2    5.10    1.90
 -13  -6  -2    2.00    2.30
  13  -6   2    3.50    2.10
 -13   6  -2    0.60    1.50
 -13   6  -2    7.50    1.70
  14  -6   2   33.80    3.50
 -14  -6  -2   29.40    4.20
  14   6   2   33.00    3.70
 -14   6  -2   34.30    3.10
 -14   6  -2   25.10    2.90
  15  -6   2    7.30    2.30
 -15  -6  -2    7.30    2.80
 -15   6  -2    3.00    1.90
  15   6   2    6.80    2.10
 -15   6  -2    6.00    1.90
 -16  -6  -2    6.20    2.60
  16  -6   2    5.70    2.40
 -16   6  -2    8.30    1.90
  16   6   2    9.60    2.50
  17  -6   2   13.30    2.40
 -17  -6  -2   11.10    3.00
  17   6   2   17.40    3.00
 -17   6  -2   14.60    2.50
 -18  -6  -2   10.90    2.90
  18  -6   2   12.60    2.70
  18   6   2   17.00    2.90
  19  -6   2    2.20    2.60
 -19  -6  -2   -0.80    2.50
  19   6   2    5.20    2.70
  20  -6   2   46.60    4.60
 -20  -6  -2   37.10    4.90
  20   6   2   47.80    4.90
  21  -6   2   12.10    3.30
 -21  -6  -2    9.60    3.10
  21   6   2   14.40    3.40
  22  -6   2   36.90    4.70
 -22  -6  -2   35.90    4.80
  22   6   2   51.99    5.40
 -23  -6  -2   21.40    3.60
  23  -6   2   27.60    4.60
  24  -7  -2   -2.90    3.00
 -24  -7   2   -3.40    3.10
  24   7  -2   -0.90    3.20
  23  -7  -2    2.30    3.10
  23   7  -2   10.00    4.50
 -22  -7   2    7.40    3.20
  22  -7  -2    6.60    3.30
  22   7  -2   17.30    3.80
  21  -7  -2    6.40    2.70
 -21  -7   2    6.40    2.90
  21   7  -2    1.90    3.20
  20  -7  -2    1.50    2.70
 -20  -7   2    5.40    2.70
  20   7  -2    2.20    3.00
 -19  -7   2    2.90    2.60
  19  -7  -2    2.60    2.60
  19   7  -2    3.00    2.90
 -19   7   2    2.90    2.20
  18  -7  -2   14.40    2.70
 -18  -7   2   11.90    2.80
 -18   7   2   10.10    2.60
  18   7  -2   12.90    3.00
 -17  -7   2    0.80    2.10
  17  -7  -2   -0.70    2.30
 -17   7   2    1.90    1.90
  17   7  -2    0.10    2.30
  16  -7  -2   39.50    4.10
  16   7  -2   42.00    4.30
 -16   7   2   36.20    3.60
 -15  -7   2   99.89    6.50
  15  -7  -2  116.59    6.50
 -15   7   2  105.49    6.40
  15   7  -2  110.89    6.70
 -14  -7   2  141.09    8.30
  14  -7  -2  158.88    8.30
 -14   7   2  160.78    8.00
  14   7  -2  155.48    8.50
  13  -7  -2    5.80    2.20
 -13  -7   2    4.70    2.00
 -13   7   2    2.70    1.50
  13   7  -2    6.20    2.40
 -12  -7   2   13.90    2.30
  12  -7  -2   12.40    2.40
 -12   7   2   10.80    1.90
  12   7  -2   11.10    2.30
 -11  -7   2    6.50    1.80
  11  -7  -2    0.50    1.70
  11   7  -2    6.20    2.00
  11   7  -2    4.00    1.30
 -11   7   2    6.20    1.70
  10  -7  -2   66.09    4.40
 -10  -7   2   61.39    4.30
  10   7  -2   64.09    3.60
  10   7  -2   62.19    4.60
 -10   7   2   59.89    4.00
  -9  -7   2    3.00    1.60
   9  -7  -2    5.60    1.90
   9   7  -2    3.30    1.20
  -9   7   2    3.50    1.30
   9   7  -2    3.50    1.80
  -8  -7   2  135.09    6.80
   8  -7  -2  136.79    7.00
  -8   7   2  123.69    6.60
   8   7  -2  126.89    7.20
   8   7  -2  125.09    6.50
  -7  -7   2   31.40    2.70
   7  -7  -2   27.80    3.10
  -7   7   2   24.20    2.40
   7   7  -2   26.60    3.10
   7   7  -2   31.00    2.40
   6  -7  -2  218.98   10.60
  -6  -7   2  235.58   11.20
   6   7  -2  210.08   10.70
  -6   7   2  202.78   10.30
   6   7  -2  205.58   10.20
  -5  -7   2    1.70    1.20
   5  -7  -2    2.30    1.50
   5   7  -2    3.70    1.30
  -5   7   2    2.20    1.20
   5   7  -2    2.40    1.70
   4  -7  -2   43.80    3.40
  -4  -7   2   40.30    2.60
   4   7  -2   41.60    2.80
   4   7  -2   46.30    3.60
  -4   7   2   39.00    2.80
   3  -7  -2   -0.90    1.40
  -3  -7   2   -1.20    0.80
   3   7  -2    2.10    1.20
  -3   7   2    0.20    1.20
   3   7  -2    2.00    1.60
   2  -7  -2    4.80    1.50
   2   7  -2    1.40    1.20
  -2   7   2    3.30    1.20
   2   7  -2    5.30    1.60
   1  -7  -2    6.40    1.70
  -1   7   2    8.80    1.40
   1   7  -2    9.10    1.50
   0  -7   2   39.90    3.30
   0   7   2   40.90    2.80
   0   7  -2   42.50    2.90
   1  -7   2  148.79    7.80
   1   7   2  149.19    7.30
  -1   7  -2  155.18    7.50
   1   7   2  143.69    7.70
   2  -7   2   19.40    2.60
   2   7   2   21.70    2.70
  -2   7  -2   17.00    2.00
   2   7   2   19.70    2.00
   3  -7   2  162.48    8.20
   3   7   2  160.18    7.80
   3   7   2  160.38    8.20
  -3   7  -2  153.88    7.90
   4  -7   2  162.98    8.20
  -4   7  -2  151.48    7.80
   4   7   2  158.18    8.20
   4   7   2  160.48    7.70
   5  -7   2  177.58    9.00
  -5   7  -2  170.98    8.70
   5   7   2  180.98    9.10
   6  -7   2    5.70    1.70
   6   7   2    9.60    2.10
  -6   7  -2    8.90    1.70
   6   7   2    7.30    1.30
   7  -7   2    3.30    1.80
   7   7   2    3.10    1.80
   7   7   2    3.60    1.20
  -7   7  -2   -0.30    1.20
   8  -7   2    9.30    2.00
  -8   7  -2    8.20    1.80
   8   7   2    4.10    1.90
   8   7   2    5.60    1.20
  -9  -7  -2   90.49    5.60
   9  -7   2   80.79    5.00
  -9   7  -2   82.89    4.90
   9   7   2   85.29    5.40
   9   7   2   83.09    4.50
 -10  -7  -2    0.10    2.00
  10  -7   2    3.00    1.80
  10   7   2   -1.20    1.80
 -10   7  -2    2.10    1.60
  10   7   2    0.70    1.20
  11  -7   2   33.80    3.50
 -11  -7  -2   34.80    3.90
 -11   7  -2   32.90    3.00
  11   7   2   35.50    2.60
  11   7   2   30.40    3.60
  12  -7   2   54.39    4.30
 -12  -7  -2   50.99    4.80
 -12   7  -2   60.99    4.00
  12   7   2   58.99    4.60
  13  -7   2   47.30    4.10
 -13  -7  -2   42.80    4.50
  13   7   2   42.20    4.20
 -13   7  -2   50.09    3.70
  14  -7   2   96.19    5.70
 -14  -7  -2   89.19    6.20
 -14   7  -2   78.19    6.90
  14   7   2   84.79    5.80
 -15  -7  -2   46.00    5.00
  15  -7   2   62.29    4.60
 -15   7  -2   63.49    4.30
  15   7   2   60.59    4.90
  16  -7   2   29.20    3.80
 -16  -7  -2   25.00    4.20
  16   7   2   23.70    4.10
 -16   7  -2   34.00    3.50
 -17  -7  -2    2.70    2.70
  17  -7   2    1.70    2.40
 -17   7  -2   -0.80    2.00
  17   7   2    0.40    2.40
 -18  -7  -2   19.00    3.40
  18  -7   2   20.70    3.20
 -18   7  -2   18.00    2.90
  18   7   2   19.80    3.40
 -19  -7  -2   -1.80    2.60
  19  -7   2   -3.40    2.40
  19   7   2    0.10    2.80
 -20  -7  -2   27.50    4.40
  20  -7   2   31.90    4.50
  20   7   2   34.30    4.90
  21  -7   2    6.10    2.80
 -21  -7  -2    2.30    2.90
  21   7   2    6.20    3.30
  22  -7   2    0.70    3.90
  22   7   2    8.30    4.30
 -23  -7  -2    6.40    3.20
  23  -7   2    1.80    2.80
  23   7   2    8.60    3.70
  23  -8  -2   -0.20    3.00
 -23  -8   2   -6.00    3.20
  23   8  -2    1.80    3.60
  22  -8  -2    0.60    3.40
 -22  -8   2    0.50    3.50
  22   8  -2    5.00    4.50
  21  -8  -2   14.00    3.10
 -21  -8   2   15.30    3.20
  21   8  -2   23.20    4.10
 -20  -8   2   -0.10    2.60
  20  -8  -2   -1.50    3.00
  20   8  -2    3.20    3.40
 -19  -8   2    3.90    2.70
  19  -8  -2    2.30    2.60
  19   8  -2    7.00    3.20
 -19   8   2    4.40    2.30
  18  -8  -2   -0.30    2.40
 -18  -8   2   -1.00    2.50
  18   8  -2    1.10    2.70
 -18   8   2    0.20    2.20
 -17  -8   2    2.80    2.50
  17  -8  -2    3.90    2.70
 -17   8   2    3.20    2.20
  17   8  -2    4.10    2.90
  16  -8  -2   -1.10    2.30
 -16  -8   2    0.10    2.50
  16   8  -2   -0.10    2.30
 -16   8   2   -0.10    1.80
  15  -8  -2    4.10    2.40
 -15  -8   2    3.90    2.30
  15   8  -2    3.30    2.40
 -15   8   2    3.80    1.80
  14  -8  -2    7.40    2.40
 -14  -8   2    4.60    2.30
  14   8  -2    7.50    2.40
 -14   8   2   10.50    2.10
  13  -8  -2   -0.40    2.00
  13   8  -2    0.30    2.30
 -13   8   2   -0.90    1.50
 -12  -8   2    0.30    1.90
  12  -8  -2    0.80    2.10
  12   8  -2    2.20    2.20
 -12   8   2    2.80    1.60
 -11  -8   2   38.20    3.60
  11  -8  -2   40.20    3.90
  11   8  -2   40.90    4.10
  11   8  -2   47.70    3.10
  10  -8  -2   38.60    3.80
 -10  -8   2   33.80    3.50
  10   8  -2   41.20    2.90
  10   8  -2   37.90    3.90
 -10   8   2   35.30    3.20
   9  -8  -2   27.10    3.30
  -9  -8   2   26.90    3.00
  -9   8   2   33.00    3.00
   9   8  -2   31.30    2.70
   9   8  -2   32.30    3.60
   8  -8  -2    6.90    2.10
  -8  -8   2    4.10    1.70
   8   8  -2    5.60    2.10
   8   8  -2    5.90    1.50
  -8   8   2    3.20    1.50
  -7  -8   2    4.80    1.50
   7  -8  -2    2.20    1.80
   7   8  -2    3.90    1.40
  -7   8   2    2.20    1.40
   7   8  -2    4.80    2.10
   6  -8  -2    8.00    2.00
  -6  -8   2    7.90    1.60
   6   8  -2   12.90    1.80
  -6   8   2   10.50    1.80
   6   8  -2   11.80    2.30
   5  -8  -2    3.80    1.80
  -5  -8   2   -0.90    1.20
   5   8  -2    0.10    1.20
  -5   8   2    1.50    1.30
   5   8  -2    3.50    2.00
   4  -8  -2    7.70    2.00
  -4  -8   2    7.40    1.40
  -4   8   2    8.20    1.60
   4   8  -2    8.30    2.10
   4   8  -2    7.90    1.50
  -3  -8   2   38.80    2.70
   3  -8  -2   54.69    3.80
  -3   8   2   48.50    3.30
   3   8  -2   50.49    3.90
   3   8  -2   48.50    3.30
   2  -8  -2    3.60    1.80
   2   8  -2    2.00    1.70
  -2   8   2    2.90    1.30
   2   8  -2    2.20    1.40
  -1  -8   2    5.30    1.90
   1  -8  -2    8.50    2.00
  -1   8   2    9.20    1.50
   1   8  -2    9.60    1.70
   0  -8  -2    3.80    1.70
   0  -8   2    4.90    1.80
   0   8   2    4.60    1.30
   0   8  -2    5.40    1.50
   1  -8   2  301.77   14.80
  -1  -8  -2  323.07   14.20
  -1   8  -2  288.77   14.40
   1   8   2  304.07   14.40
   2  -8   2   62.89    4.30
   2   8   2   56.59    3.60
  -2   8  -2   64.29    3.90
   2   8   2   53.59    4.30
   3  -8   2  483.25   22.80
  -3   8  -2  474.85   22.50
   3   8   2  483.75   22.40
   3   8   2  498.05   22.90
   4  -8   2  172.98    8.60
   4   8   2  166.28    8.50
   4   8   2  150.78    8.00
  -4   8  -2  158.58    8.10
   5  -8   2   42.20    3.80
  -5  -8  -2   50.29    3.60
   5   8   2   40.00    3.90
   5   8   2   45.00    3.10
  -5   8  -2   37.60    3.30
   6  -8   2    5.60    1.90
  -6  -8  -2    4.60    1.80
   6   8   2    3.40    2.00
   6   8   2    1.90    1.20
  -6   8  -2    4.40    1.60
  -7  -8  -2  106.89    6.00
   7  -8   2  101.39    6.00
   7   8   2  101.39    6.10
   7   8   2  100.29    5.40
  -7   8  -2   97.39    5.60
  -8  -8  -2  124.49    7.00
   8  -8   2  134.99    7.80
   8   8   2  117.39    7.20
  -8   8  -2  130.39    6.70
   8   8   2  122.79    6.40
   9  -8   2    8.50    2.20
  -9  -8  -2   11.20    2.30
   9   8   2    7.70    2.80
   9   8   2    7.70    1.60
  -9   8  -2    8.10    1.90
  10  -8   2   73.29    5.10
 -10  -8  -2   86.89    5.50
  10   8   2   79.99    5.50
  10   8   2   80.69    4.60
 -10   8  -2   76.89    5.00
  11  -8   2   13.60    2.40
 -11  -8  -2    9.00    2.60
 -11   8  -2    7.60    2.00
  11   8   2   14.40    2.40
  11   8   2    7.60    2.50
 -12  -8  -2    6.60    2.70
  12  -8   2    7.30    2.20
 -12   8  -2    7.50    2.10
  12   8   2    3.80    2.20
  13  -8   2    0.80    2.00
 -13  -8  -2    6.20    2.50
 -13   8  -2    2.30    1.80
  13   8   2    2.20    2.40
 -14  -8  -2   22.80    4.10
  14  -8   2   21.50    3.60
  14   8   2   26.50    3.60
 -14   8  -2   26.60    3.20
 -15  -8  -2   14.70    3.20
  15  -8   2    9.90    2.50
 -15   8  -2   12.90    2.40
  15   8   2   13.70    3.00
  16  -8   2   29.40    4.00
 -16  -8  -2   26.70    4.60
  16   8   2   28.20    4.40
 -16   8  -2   31.50    3.70
 -17  -8  -2    6.60    2.90
  17  -8   2    5.80    2.70
 -17   8  -2    7.00    2.50
  17   8   2    6.20    3.20
  18  -8   2    4.10    2.70
 -18  -8  -2    1.40    2.80
  18   8   2    2.70    2.90
 -18   8  -2    1.80    2.40
  19  -8   2    2.20    2.70
 -19  -8  -2   -1.10    2.80
  19   8   2    3.90    3.10
 -19   8  -2   -0.70    2.60
 -20  -8  -2    1.50    3.00
  20  -8   2    1.30    2.90
  20   8   2   -1.00    3.10
  21  -8   2   46.80    5.70
 -21  -8  -2   50.69    6.30
  21   8   2   63.89    7.90
  22  -8   2    9.80    3.30
 -22  -8  -2    0.60    3.10
  22   8   2    8.50    3.50
 -21  -9   2   -5.70    3.70
  21  -9  -2    1.90    3.30
  21   9  -2   -0.90    3.70
  20  -9  -2    0.80    2.90
 -20  -9   2    2.50    3.00
  20   9  -2    1.80    3.70
 -19  -9   2    1.00    3.00
  19  -9  -2    6.10    3.10
 -19   9   2   11.30    2.90
  19   9  -2    6.50    3.60
 -18  -9   2   16.70    3.40
  18  -9  -2   22.80    3.50
 -18   9   2   24.20    3.20
  18   9  -2   14.70    3.40
 -17  -9   2   -0.90    2.60
  17  -9  -2   -0.10    2.50
 -17   9   2   -1.80    2.40
  17   9  -2   -2.80    2.80
 -16  -9   2    5.40    2.80
  16  -9  -2    5.60    2.50
  16   9  -2    9.70    3.30
 -16   9   2   11.00    2.30
  15  -9  -2   32.50    4.20
 -15  -9   2   26.00    4.10
  15   9  -2   34.60    4.60
 -15   9   2   39.30    3.60
 -14  -9   2   49.99    4.80
  14  -9  -2   54.59    4.80
 -14   9   2   52.89    4.20
  14   9  -2   54.39    5.10
 -13  -9   2   -2.90    2.20
  13  -9  -2   -0.80    2.20
 -13   9   2    1.70    1.80
  13   9  -2   -1.00    2.60
 -12  -9   2   20.80    3.80
  12  -9  -2   30.50    3.70
 -12   9   2   28.90    3.10
  12   9  -2   29.20    3.90
  11  -9  -2   54.59    4.30
 -11  -9   2   45.10    4.40
  11   9  -2   63.39    3.90
 -11   9   2   55.89    3.90
  11   9  -2   53.29    4.90
  10  -9  -2   32.10    3.70
 -10  -9   2   27.00    3.50
  10   9  -2   31.90    4.00
 -10   9   2   28.50    3.00
  10   9  -2   35.10    3.10
   9  -9  -2   39.30    3.90
  -9  -9   2   38.40    3.70
   9   9  -2   44.40    4.30
  -9   9   2   45.50    3.50
   9   9  -2   42.60    3.50
  -8  -9   2  266.37   12.80
   8  -9  -2  259.97   12.90
  -8   9   2  249.28   12.50
   8   9  -2  260.57   12.60
   8   9  -2  268.67   13.20
   7  -9  -2   18.90    3.20
  -7  -9   2   14.80    2.60
   7   9  -2   18.60    2.50
  -7   9   2   16.30    2.40
   7   9  -2   15.50    2.60
  -6  -9   2   38.30    3.60
   6   9  -2   43.40    5.00
   6   9  -2   51.69    3.30
  -6   9   2   40.50    3.40
   5  -9  -2   28.50    3.40
  -5   9   2   23.70    3.40
   5   9  -2   27.90    2.80
   5   9  -2   24.00    3.60
   4  -9  -2   40.30    3.70
   4   9  -2   38.90    3.10
  -4   9   2   35.60    2.90
   4   9  -2   40.90    4.00
   3  -9  -2  196.08   10.10
   3   9  -2  193.08   10.10
   3   9  -2  196.28    9.60
  -3   9   2  193.18    9.60
   2  -9  -2    7.40    2.10
  -2   9   2    4.70    1.50
   2   9  -2    7.00    1.70
   1  -9  -2    2.50    2.00
  -1  -9   2    3.80    2.00
   1   9  -2    3.10    1.60
  -1   9   2    1.70    1.40
   0  -9  -2   20.70    3.30
   0  -9   2   22.80    3.30
   0   9  -2   19.10    2.40
   0   9   2   18.60    2.40
   1  -9   2    5.40    2.00
  -1  -9  -2    3.90    2.00
   1   9   2    6.40    1.60
  -1   9  -2    8.30    1.70
   2  -9   2   40.80    3.90
  -2   9  -2   36.00    3.20
   2   9   2   41.60    3.10
  -3  -9  -2   17.40    2.50
   3  -9   2   12.50    2.40
   3   9   2   11.90    2.60
   3   9   2   11.50    1.80
  -3   9  -2   11.30    2.00
   4  -9   2   85.99    6.50
   4   9   2  100.49    5.30
   4   9   2   94.99    6.10
   5  -9   2    7.40    2.20
  -5  -9  -2    5.40    2.00
  -5   9  -2    5.70    1.70
   5   9   2    5.70    1.60
   5   9   2    5.80    2.30
   6  -9   2   14.10    2.50
  -6  -9  -2   16.50    2.60
  -6   9  -2   16.70    2.30
   6   9   2   15.30    2.40
  -7  -9  -2   16.50    2.80
   7  -9   2   26.80    3.30
   7   9   2   22.20    3.60
   7   9   2   25.90    2.60
  -7   9  -2   23.50    2.70
  -8  -9  -2  170.78    9.20
   8  -9   2  177.28    9.10
  -8   9  -2  169.28    8.80
   8   9   2  170.88    8.60
   8   9   2  167.48    9.30
   9  -9   2    2.60    2.00
  -9  -9  -2    7.20    2.20
  -9   9  -2    6.30    1.80
   9   9   2    6.80    2.50
   9   9   2    5.60    1.80
  10  -9   2   26.30    3.50
 -10  -9  -2   30.90    3.90
  10   9   2   29.70    3.90
  10   9   2   26.90    3.10
 -10   9  -2   31.00    3.20
 -11  -9  -2   10.30    3.90
  11  -9   2    8.50    2.40
 -11   9  -2    9.70    2.20
  11   9   2   16.70    3.50
  11   9   2    9.50    2.50
  12  -9   2   54.59    4.60
 -12  -9  -2   50.09    4.90
  12   9   2   54.39    5.10
 -12   9  -2   50.59    3.90
 -13  -9  -2    6.10    2.80
  13  -9   2   11.90    2.70
 -13   9  -2    9.10    2.10
  13   9   2    4.90    2.60
  14  -9   2    2.20    2.50
 -14  -9  -2   -0.80    2.60
 -14   9  -2   -0.90    1.90
  14   9   2    0.20    2.60
 -15  -9  -2   20.70    3.50
  15  -9   2   22.70    3.30
 -15   9  -2   15.40    2.60
  15   9   2   12.10    3.00
  16  -9   2    1.00    2.50
 -16  -9  -2    0.60    2.80
  16   9   2    2.30    3.00
 -16   9  -2    0.00    2.10
  17  -9   2    7.20    2.70
 -17  -9  -2    8.60    3.10
 -17   9  -2    5.20    2.30
  17   9   2   11.50    3.40
 -18  -9  -2   -2.20    3.00
  18  -9   2   -1.60    2.60
 -18   9  -2    1.80    2.50
  18   9   2    6.10    3.50
  19  -9   2    7.80    3.20
 -19  -9  -2   -0.40    3.10
 -19   9  -2    3.20    2.70
  19   9   2   -1.50    3.30
 -20  -9  -2    4.60    4.10
  20  -9   2   -1.40    2.90
  20   9   2    4.80    4.80
 -20 -10   2    0.60    3.20
  20 -10  -2    2.90    3.20
  20  10  -2   -4.00    3.60
 -20  10   2    9.90    4.40
 -19 -10   2   -3.20    3.10
 -19  10   2    4.90    2.80
  19  10  -2    0.50    5.50
 -18 -10   2   -7.80    3.30
  18 -10  -2    3.50    3.20
  18  10  -2    1.30    3.30
 -18  10   2    6.30    2.60
 -17 -10   2   -5.50    2.90
  17 -10  -2    3.60    2.70
  17  10  -2    0.90    3.30
 -17  10   2    1.30    2.20
 -16 -10   2    0.30    2.80
  16 -10  -2    2.50    2.60
 -16  10   2    6.00    2.60
  16  10  -2    9.90    3.40
 -15 -10   2   -0.20    2.70
  15 -10  -2    4.50    2.70
 -15  10   2    4.10    2.10
  15  10  -2    0.00    2.90
 -14 -10   2    4.30    2.80
  14 -10  -2   11.20    3.00
  14  10  -2    7.20    3.10
 -14  10   2   13.40    2.40
  13 -10  -2   22.30    3.20
 -13  10   2   21.10    3.30
  13  10  -2   19.90    3.50
  12 -10  -2   16.80    2.90
 -12 -10   2    6.90    2.70
  12  10  -2    9.60    2.70
 -12  10   2   10.80    2.30
 -11 -10   2    4.00    2.60
  11 -10  -2    9.60    2.60
 -11  10   2    9.30    2.10
  11  10  -2    7.50    2.90
  11  10  -2    8.60    2.20
  10 -10  -2   -0.90    2.20
  10  10  -2    3.10    2.60
 -10  10   2    1.30    1.60
  10  10  -2    3.10    1.90
   9 -10  -2   12.60    2.50
  -9  10   2   16.60    2.30
   9  10  -2   12.20    2.20
   9  10  -2   11.20    2.70
   8 -10  -2    2.30    2.00
  -8  10   2    1.40    1.60
   8  10  -2    2.00    1.90
   8  10  -2    0.50    2.40
   7 -10  -2   26.50    3.60
  -7  10   2   26.70    2.80
   7  10  -2   36.40    3.30
   7  10  -2   30.40    4.10
   6 -10  -2   53.19    4.40
   6  10  -2   52.79    4.50
   6  10  -2   55.99    3.90
  -6  10   2   49.10    3.60
   5 -10  -2   10.70    2.30
  -5  10   2   14.90    2.30
   5  10  -2   15.60    2.90
   5  10  -2   17.00    2.80
   4 -10  -2   30.80    3.70
  -4  10   2   25.60    2.80
   3 -10  -2    2.20    2.10
  -3  10   2    2.30    1.60
   3  10  -2    5.20    1.70
  -2 -10   2   30.60    3.90
   2 -10  -2   39.90    4.00
   2  10  -2   38.10    3.20
  -2  10   2   36.40    3.00
  -1 -10   2    8.20    2.60
   1 -10  -2   10.40    2.60
  -1  10   2    6.80    1.70
   1  10  -2    8.20    1.90
   0 -10  -2   68.79    5.00
   0 -10   2   64.89    5.00
   0  10  -2   65.69    4.20
   0  10   2   68.39    4.30
  -1 -10  -2   -1.20    1.90
   1 -10   2    1.40    2.10
   1  10   2   -0.20    1.30
  -1  10  -2    0.10    1.60
  -2 -10  -2   66.89    5.00
   2 -10   2   56.99    4.80
  -2  10  -2   63.09    4.30
   2  10   2   70.79    4.30
   3 -10   2   26.10    3.60
  -3  10  -2   27.50    3.10
   3  10   2   27.60    3.10
   4 -10   2   42.20    3.90
  -4  10  -2   47.20    3.70
   4  10   2   44.60    4.40
   5 -10   2    0.20    2.00
  -5  10  -2    0.50    1.70
   5  10   2    2.20    2.40
   6 -10   2   15.90    2.60
  -6  10  -2   17.70    2.50
   6  10   2   16.00    2.40
   6  10   2   13.60    2.70
   7 -10   2   -0.50    1.90
  -7  10  -2    2.30    1.80
   7  10   2    1.80    2.40
   7  10   2    2.20    1.80
   8 -10   2   65.09    5.00
   8  10   2   68.79    4.50
  -8  10  -2   68.39    4.60
   8  10   2   68.59    5.40
   9 -10   2    9.10    2.50
  -9 -10  -2    9.40    2.70
   9  10   2    7.20    2.20
   9  10   2    7.70    2.90
  -9  10  -2    6.70    1.90
  10 -10   2   16.60    2.90
 -10 -10  -2   17.90    3.60
  10  10   2   16.80    3.30
  10  10   2   14.70    2.50
 -10  10  -2   18.60    2.60
  11 -10   2    5.60    2.30
 -11 -10  -2    5.00    2.80
  11  10   2    0.90    2.50
 -11  10  -2    5.40    2.10
 -12 -10  -2    2.20    2.70
  12 -10   2    1.90    2.30
  12  10   2    6.70    3.00
 -12  10  -2    2.70    2.00
  13 -10   2   -1.30    2.30
 -13 -10  -2   -0.20    2.70
 -13  10  -2   -1.90    2.10
  13  10   2   -0.30    2.80
  14 -10   2    2.90    2.80
 -14 -10  -2   -2.40    2.60
 -14  10  -2    2.20    2.00
  14  10   2   -3.10    2.80
  15 -10   2   24.10    3.50
 -15 -10  -2   13.70    3.50
  15  10   2   12.30    3.40
 -15  10  -2   15.40    2.80
 -16 -10  -2   -0.50    3.20
  16 -10   2    4.60    2.80
 -16  10  -2    2.10    2.10
  16  10   2    5.10    3.40
  17 -10   2    0.80    2.80
 -17  10  -2   -2.20    2.40
  17  10   2    2.40    3.40
 -18  10  -2    5.00    2.70
  18  10   2    3.50    3.80
 -19 -10  -2    4.60    4.40
  19  10   2    8.60    3.80
 -19  10  -2    3.10    3.10
  18 -11  -2    3.40    3.10
 -18 -11   2   -6.80    3.50
  18  11  -2    4.60    3.50
 -18  11   2    4.10    2.70
  17  11  -2   54.19    6.50
 -17  11   2   71.19    5.30
  16 -11  -2    6.30    3.20
 -16 -11   2   -0.20    3.40
  16  11  -2    5.00    3.30
 -16  11   2    7.70    2.40
 -15 -11   2   20.80    4.20
  15 -11  -2   32.50    4.60
  15  11  -2   23.60    3.80
 -15  11   2   36.40    4.20
 -14 -11   2    2.40    3.20
  14 -11  -2    0.10    2.50
  14  11  -2    6.50    3.30
 -14  11   2    5.00    2.40
  13 -11  -2   11.30    2.70
  13  11  -2   18.80    3.80
 -13  11   2   22.20    2.90
  12 -11  -2   14.90    3.00
  12  11  -2   13.80    3.50
 -12  11   2   12.80    2.50
  11 -11  -2   12.20    2.90
  11  11  -2   13.50    4.00
  11  11  -2    7.60    3.00
 -11  11   2   10.90    2.20
  10 -11  -2    3.10    2.50
  10  11  -2    3.00    2.40
 -10  11   2    2.40    1.90
  10  11  -2    2.50    2.70
   9 -11  -2   35.10    4.10
   9  11  -2   31.00    4.70
   9  11  -2   35.10    4.00
  -9  11   2   35.20    3.50
   8 -11  -2    1.20    2.40
   8  11  -2    1.10    2.70
  -8  11   2   -0.50    1.80
   8  11  -2   -2.10    2.10
   7 -11  -2    4.30    2.30
  -7  11   2   -0.10    1.70
   7  11  -2   -0.50    1.90
   7  11  -2   -0.70    2.50
   6 -11  -2    0.60    2.10
   6  11  -2    4.10    1.90
  -6  11   2    3.20    1.70
   6  11  -2    0.30    2.40
   5 -11  -2    4.70    2.20
   5  11  -2    3.80    1.90
  -5  11   2    2.10    1.70
   4 -11  -2   25.10    3.80
  -4  11   2   35.60    3.30
   4  11  -2   38.80    3.40
  -3 -11   2    8.70    2.70
   3 -11  -2    5.90    2.30
  -3  11   2    7.60    1.90
   3  11  -2    9.70    1.90
   2 -11  -2   -0.40    2.10
  -2 -11   2    1.10    2.30
  -2  11   2    4.10    1.70
   2  11  -2    4.10    1.70
   1 -11  -2    5.90    2.50
  -1 -11   2    2.50    2.20
  -1  11   2    2.20    1.60
   1  11  -2    2.40    1.80
   0 -11   2    5.50    2.30
   0 -11  -2    5.50    2.40
   0  11  -2    8.80    1.90
   0  11   2    6.50    1.70
  -1 -11  -2    0.00    2.20
   1 -11   2    1.60    2.10
  -1  11  -2    0.40    1.70
   1  11   2    3.00    1.70
  -2 -11  -2    5.50    2.40
   2 -11   2    2.80    2.10
  -2  11  -2    3.90    1.80
   2  11   2    4.50    1.90
  -3 -11  -2   24.00    4.00
   3 -11   2   23.60    3.80
  -3  11  -2   22.20    3.00
   3  11   2   29.00    3.20
   4 -11   2   -0.60    2.20
   4  11   2    6.30    1.90
  -4  11  -2    0.70    1.80
   5 -11   2    2.20    2.20
  -5  11  -2   -1.50    1.60
   5  11   2    2.40    1.80
   6 -11   2   21.80    3.80
  -6  11  -2   29.70    3.20
   6  11   2   34.90    3.40
   6  11   2   28.80    4.30
   7 -11   2   -1.60    2.30
   7  11   2    1.00    1.90
   7  11   2    1.80    2.60
  -7  11  -2    1.10    1.80
   8 -11   2   16.90    3.10
   8  11   2   18.30    2.60
  -8  11  -2   17.60    2.80
   8  11   2   14.90    3.10
   9 -11   2  135.99    7.90
   9  11   2  143.19    7.80
   9  11   2  134.49    8.40
  -9  11  -2  136.29    7.60
  10 -11   2    6.00    2.60
  10  11   2    5.70    3.00
 -10  11  -2    1.80    2.00
  10  11   2    4.50    2.50
  11 -11   2    3.20    2.50
  11  11   2    4.80    3.20
 -11  11  -2    0.80    2.00
  12 -11   2   14.50    3.10
 -12 -11  -2    9.00    3.50
  12  11   2   17.30    3.70
 -12  11  -2   13.10    2.40
 -13 -11  -2   -4.20    3.10
  13 -11   2    9.20    2.80
 -13  11  -2    3.10    2.10
  13  11   2    3.70    3.20
  14 -11   2    0.80    2.70
  14  11   2   -1.70    3.20
 -14  11  -2    0.00    2.20
  15 -11   2    7.20    2.80
 -15 -11  -2    3.20    3.60
 -15  11  -2    6.40    2.60
  15  11   2    5.80    3.40
  16 -11   2    1.60    3.50
 -16 -11  -2   -3.70    3.40
 -16  11  -2   -1.00    2.40
  16  11   2    1.00    3.60
  17 -11   2   31.90    4.20
 -17  11  -2   36.80    4.60
  17  11   2   31.20    4.80
  16 -12  -2    0.10    3.20
  16  12  -2    0.40    3.40
  15 -12  -2    6.60    4.60
 -15  12   2    9.10    2.70
  14 -12  -2   -2.00    2.70
  14  12  -2   -1.50    3.30
 -14  12   2   -0.20    2.40
  13 -12  -2   38.10    4.70
  13  12  -2   40.10    5.50
 -13  12   2   32.90    4.40
  12 -12  -2   13.50    3.10
 -12  12   2   10.30    2.60
  12  12  -2    6.70    3.40
  11 -12  -2    6.90    2.70
 -11  12   2    4.90    2.10
  11  12  -2    8.50    3.40
  10 -12  -2   -1.70    2.30
  10  12  -2    1.10    3.00
 -10  12   2   -0.90    2.10
  10  12  -2    3.30    2.50
   9 -12  -2    1.70    2.30
   9  12  -2    3.70    2.60
  -9  12   2    3.00    1.90
   9  12  -2    6.00    2.90
   8 -12  -2    3.50    2.60
   8  12  -2    5.90    2.50
   8  12  -2    4.70    3.10
  -8  12   2    4.90    2.00
   7 -12  -2   18.30    3.20
   7  12  -2   17.90    3.00
  -7  12   2   20.20    3.20
   6 -12  -2    3.40    2.60
  -6  12   2    7.00    2.10
   6  12  -2    7.50    2.60
   5 -12  -2    3.30    2.60
  -5 -12   2   -0.70    2.40
  -5  12   2    4.00    1.90
   5  12  -2    4.00    2.20
   4 -12  -2   47.20    4.90
  -4 -12   2   53.19    5.10
   4  12  -2   57.39    4.30
  -4  12   2   49.00    3.90
  -3 -12   2    2.70    2.50
   3 -12  -2    6.50    2.50
   3  12  -2    6.50    2.10
  -3  12   2    8.10    2.00
  -2 -12   2  113.09    7.30
   2 -12  -2  114.29    7.20
  -2  12   2  112.39    6.50
   2  12  -2  117.49    6.60
   1 -12  -2    9.00    2.90
  -1  12   2   15.20    2.40
   1  12  -2   13.70    2.40
   0 -12  -2    6.00    3.00
   0 -12   2    0.60    2.60
   0  12  -2    2.90    1.80
   0  12   2    2.80    2.00
   1 -12   2    5.70    2.60
  -1 -12  -2    3.90    2.50
  -1  12  -2    6.00    2.00
   1  12   2    4.90    2.10
   2 -12   2   50.29    4.80
  -2 -12  -2   55.69    5.20
  -2  12  -2   54.89    4.10
   2  12   2   60.09    4.30
   3 -12   2   46.60    4.70
  -3 -12  -2   48.30    5.00
  -3  12  -2   55.49    4.20
   3  12   2   60.99    4.40
   4 -12   2    2.30    2.30
  -4 -12  -2    3.40    2.80
  -4  12  -2    7.40    2.10
   4  12   2    8.00    2.30
   5 -12   2    1.20    2.50
  -5 -12  -2    0.30    2.50
  -5  12  -2    0.60    1.80
   5  12   2    1.30    2.00
   6 -12   2   12.40    2.80
   6  12   2    6.00    2.20
  -6  12  -2   10.10    2.30
   7 -12   2    0.10    2.60
   7  12   2    1.90    2.30
  -7  12  -2    1.10    2.10
   8 -12   2   -1.70    2.30
   8  12   2    0.60    2.40
   8  12   2    3.60    3.10
  -8  12  -2    2.10    1.90
   9 -12   2   14.30    2.90
  -9  12  -2   14.90    2.60
   9  12   2   16.70    3.70
   9  12   2   17.40    3.00
  10 -12   2    0.70    2.40
  10  12   2   -3.70    3.60
  10  12   2   -1.20    3.00
 -10  12  -2    0.10    2.00
  11 -12   2    4.10    2.40
 -11  12  -2    4.80    2.40
  11  12   2   -1.30    3.40
  12 -12   2   12.70    3.10
 -12  12  -2   13.80    2.80
  12  12   2    6.80    3.40
  13 -12   2   -0.50    2.70
  13  12   2   -3.30    3.20
 -13  12  -2    0.00    2.30
  14 -12   2    5.00    4.60
  14  12   2    1.90    3.50
 -14  12  -2    0.10    2.40
  15 -12   2    7.10    3.00
  15  12   2    7.60    3.70
 -15  12  -2    4.60    3.40
  14 -13  -2   18.10    3.60
  14  13  -2   16.30    3.90
 -14  13   2   27.10    4.00
  13 -13  -2    3.00    2.80
  13  13  -2    0.30    3.70
 -13  13   2    1.30    2.30
 -12  13   2    5.90    3.20
  12  13  -2   10.50    6.60
  11 -13  -2    2.10    2.90
  11  13  -2   -0.70    3.20
 -11  13   2    2.00    2.40
  10 -13  -2    1.50    2.70
 -10  13   2   -1.90    2.30
  10  13  -2    3.50    3.50
   9 -13  -2    3.60    2.60
   9  13  -2   12.00    3.20
  -9  13   2    6.10    2.60
   8 -13  -2   21.30    3.40
   8  13  -2   20.40    3.40
  -8  13   2   26.60    3.80
   7 -13  -2   10.50    3.10
  -7 -13   2    6.60    3.20
  -7  13   2    8.30    2.30
   7  13  -2    8.10    2.70
   6 -13  -2    2.70    2.40
  -6 -13   2    6.10    3.10
  -6  13   2    2.50    2.10
   6  13  -2    5.30    2.40
  -5 -13   2    2.30    2.90
   5 -13  -2    2.80    2.60
  -5  13   2    3.00    2.10
   5  13  -2    3.40    2.80
   4 -13  -2   28.80    4.40
  -4 -13   2   19.00    3.50
   4  13  -2   29.10    4.10
  -4  13   2   31.30    3.70
   3 -13  -2    2.50    2.60
  -3 -13   2    4.80    2.70
   3  13  -2    7.00    2.30
  -3  13   2    7.40    2.40
   2 -13  -2   -1.10    2.70
  -2 -13   2   -0.10    2.70
   2  13  -2    3.40    2.30
  -2  13   2    3.50    2.10
  -1 -13   2   -0.80    2.70
   1 -13  -2   -3.60    2.60
   1  13  -2   -0.70    2.10
  -1  13   2    0.70    1.90
   0 -13  -2    4.40    2.90
   0 -13   2    5.30    2.60
   0  13  -2    7.20    2.20
   0  13   2    8.90    2.40
  -1 -13  -2   12.20    3.30
   1 -13   2   10.30    3.00
   1  13   2   19.50    2.90
  -1  13  -2   13.80    2.60
  -2 -13  -2   -2.00    2.80
   2 -13   2    0.40    2.60
   2  13   2   -0.40    2.20
  -2  13  -2    0.70    2.00
  -3 -13  -2    3.30    2.70
   3 -13   2   -2.30    2.30
  -3  13  -2   -2.40    1.90
   3  13   2    0.50    2.10
  -4 -13  -2    8.30    3.00
   4 -13   2   11.10    3.30
  -4  13  -2   10.70    2.40
   4  13   2   20.30    2.90
   5 -13   2   -1.80    2.40
  -5 -13  -2   -0.60    2.70
  -5  13  -2   -0.20    1.90
   5  13   2    0.60    2.20
  -6 -13  -2    5.20    2.90
   6 -13   2    5.00    2.60
  -6  13  -2    6.80    2.20
   6  13   2    6.50    2.40
   7 -13   2    7.90    3.00
  -7  13  -2    6.10    2.40
   7  13   2    5.00    2.60
   8 -13   2   18.40    3.30
  -8  13  -2   15.10    2.60
   8  13   2   19.20    3.30
   9 -13   2    7.60    2.60
   9  13   2   14.80    3.50
  -9  13  -2   10.00    2.50
  10 -13   2   21.10    3.40
 -10  13  -2   18.90    2.90
  10  13   2   26.90    4.20
  11 -13   2   43.70    5.70
 -11  13  -2   40.20    5.60
  11  13   2   43.00    5.90
  12 -13   2   11.50    3.00
 -12  13  -2   13.70    2.90
  12  13   2   17.10    4.40
  13 -13   2   -1.90    2.60
 -13  13  -2    4.80    2.50
  13  13   2   -4.20    3.90
  10 -14  -2    1.60    2.90
 -10  14   2    7.10    2.50
   9 -14  -2    3.50    2.90
  -9 -14   2    2.70    3.00
  -9  14   2    9.20    2.60
   9  14  -2   15.30    3.60
  -8 -14   2    3.30    3.70
   8 -14  -2    5.80    4.20
   8  14  -2   11.30    3.20
  -8  14   2    9.00    2.70
   7 -14  -2    5.30    3.40
  -7 -14   2   14.60    4.70
   7  14  -2   11.30    3.10
   6 -14  -2    3.20    3.00
  -6 -14   2   -3.10    2.70
  -6  14   2    4.80    2.40
   6  14  -2    0.30    2.60
  -5 -14   2    3.40    3.00
   5 -14  -2    4.90    2.70
   5  14  -2    8.00    2.90
  -5  14   2   10.90    2.60
   4 -14  -2   -4.00    3.00
  -4 -14   2    1.20    2.90
   4  14  -2   -1.80    2.30
  -4  14   2    1.30    2.10
  -3 -14   2    2.60    3.00
   3 -14  -2    3.60    2.70
   3  14  -2    0.10    2.70
  -3  14   2    7.20    2.40
  -2 -14   2   -4.10    2.70
   2 -14  -2    1.80    2.80
  -2  14   2    0.00    2.30
   2  14  -2   -0.80    2.50
  -1 -14   2   28.10    3.90
   1 -14  -2   23.00    3.70
   1  14  -2   20.70    3.10
  -1  14   2   25.20    3.90
   0 -14   2    2.20    2.60
   0 -14  -2    3.60    2.90
   0  14   2    0.20    2.20
   0  14  -2   -0.70    2.20
   1 -14   2    6.50    3.00
  -1 -14  -2    4.40    3.10
   1  14   2    3.00    2.30
  -1  14  -2    5.50    2.40
   2 -14   2   -4.30    2.70
  -2 -14  -2   -4.50    3.00
   2  14   2    0.70    2.30
  -2  14  -2    3.60    2.20
   3 -14   2   29.60    5.00
  -3 -14  -2   36.00    5.40
   3  14   2   45.40    4.60
  -3  14  -2   50.99    4.40
  -4 -14  -2    0.10    3.10
   4 -14   2    1.70    2.90
   4  14   2    1.60    2.50
  -4  14  -2    6.60    2.40
  -5 -14  -2   27.20    4.20
  -5  14  -2   32.00    4.00
   5  14   2   30.80    4.30
   6 -14   2    0.20    4.00
  -6 -14  -2    0.30    3.20
   6  14   2   -1.60    2.60
   7 -14   2    7.60    3.00
   7  14   2   13.20    3.40
  -7  14  -2   15.80    3.00
   8 -14   2    2.20    2.70
  -8 -14  -2    0.60    3.10
  -8  14  -2    5.10    2.40
   8  14   2    4.00    3.10
  -9 -14  -2    3.60    3.30
   9 -14   2    0.30    2.70
  -9  14  -2    3.60    2.20
  -4 -15   2   -3.90    3.10
   4 -15  -2    2.60    2.70
  -4  15   2   -2.60    2.50
   4  15  -2    1.60    2.70
  -3 -15   2    1.50    3.10
   3 -15  -2   -1.70    3.30
   3  15  -2    6.50    2.80
  -3  15   2    2.20    2.50
  -2 -15   2   -2.20    3.00
   2 -15  -2    3.80    3.10
   2  15  -2    2.50    2.50
  -2  15   2    0.90    2.50
   1 -15  -2   -0.30    2.80
  -1 -15   2    1.00    3.10
  -1  15   2    2.20    2.50
   1  15  -2   -2.20    2.40
   0 -15   2   16.30    3.60
   0 -15  -2    6.80    3.00
   0  15   2   11.70    3.00
   0  15  -2    8.70    2.80
  -1 -15  -2    4.70    3.10
   1 -15   2    6.30    3.00
   1  15   2    2.10    2.70
  -1  15  -2    4.50    3.00
  -2 -15  -2    7.20    3.10
   2 -15   2    3.90    2.70
   2  15   2    1.10    2.60
  -2  15  -2    0.40    2.50
   3 -15   2    3.30    3.00
  -3 -15  -2    0.30    3.00
  -3  15  -2    6.70    2.80
   3  15   2    4.00    2.60
  27   0  -3    5.70    3.00
 -27   0   3    2.60    3.00
  26   0  -3    2.80    3.10
 -26   0   3   -0.70    2.70
 -25   0   3    1.50    2.60
  25   0  -3   -0.30    2.40
  24   0  -3   -0.60    2.30
 -24   0   3   -1.00    2.30
 -23   0   3   11.40    2.80
  23   0  -3   14.80    2.50
  22   0  -3    0.30    2.00
 -22   0   3   -0.10    2.20
  21   0  -3   21.80    3.40
 -21   0   3   20.50    3.40
 -20   0   3    2.60    1.80
  20   0  -3    3.70    1.80
  19   0  -3   47.20    3.70
 -19   0   3   40.00    3.70
  18   0  -3    1.60    1.70
 -18   0   3    0.60    1.70
 -17   0   3  245.38   12.00
  17   0  -3  245.28   12.00
  16   0  -3    0.70    1.50
 -16   0   3    0.00    1.40
  15   0  -3    2.20    1.60
 -15   0   3    3.40    1.50
  14   0  -3    0.20    1.20
 -14   0   3   -0.20    1.30
  13   0  -3  114.59    6.20
 -13   0   3  127.99    6.30
  12   0  -3    0.60    1.20
 -12   0   3   -0.40    1.10
  11   0  -3  142.89    7.00
 -11   0   3  138.89    7.00
 -10   0   3    0.40    0.90
  10   0  -3    0.70    1.00
  -9   0   3  473.85   21.70
  -9   0   3  481.05   22.10
   9   0  -3  492.15   22.10
  -8   0   3    0.60    0.80
   8   0  -3    0.60    0.90
  -8   0   3    0.20    0.30
  -7   0   3   75.79    3.50
   7   0  -3   77.09    3.90
  -7   0   3   75.09    3.90
   6   0  -3   -0.60    0.70
  -6   0   3    0.50    0.60
  -6   0   3    0.20    0.30
  -5   0   3   40.10    1.90
  -5   0   3   38.10    2.20
   5   0  -3   40.30    2.20
   4   0  -3    1.60    0.70
  -4   0   3    0.50    0.40
  -3   0   3   39.70    1.90
   3   0  -3   37.70    2.00
  -3   0   3   36.80    2.00
  -2   0   3   -0.20    0.40
   2   0  -3    0.60    0.30
  -1   0   3  498.95   22.00
   1   0  -3  474.45   21.90
   0   0   3    0.80    0.50
   0   0  -3    1.50    0.40
   1   0   3    6.10    1.10
   1   0   3    6.10    0.60
   2   0   3   -0.20    0.80
  -2   0  -3    1.90    0.60
   2   0   3    2.40    0.50
   3   0   3  262.67   11.80
   3   0   3  256.17   12.10
  -3   0  -3  255.07   11.70
   4   0   3    0.20    0.90
   4   0   3    0.10    0.60
  -4   0  -3    1.30    0.50
   5   0   3   17.90    1.90
   5   0   3   15.60    1.40
  -5   0  -3   17.00    1.20
   6   0   3    0.50    0.80
   6   0   3   -0.20    1.00
  -6   0  -3    0.60    0.60
  -7   0  -3   35.80    2.10
   7   0   3   41.40    2.90
   7   0   3   43.70    2.50
  -8   0  -3    0.10    0.60
   8   0   3    0.40    0.90
   8   0   3   -0.10    1.10
   9   0   3  517.95   23.50
  -9   0  -3  510.35   23.20
   9   0   3  509.25   23.80
  10   0   3    0.80    1.00
  10   0   3    0.60    1.20
 -10   0  -3   -0.20    0.60
 -11   0  -3  168.88    8.00
  11   0   3  175.98    8.50
  12   0   3    0.00    1.20
 -12   0  -3    1.40    0.70
  13   0   3  101.89    5.50
 -13   0  -3   98.59    4.80
  14   0   3   -0.80    1.40
 -14   0  -3   -2.70    1.80
 -15   0  -3  160.98    8.70
  15   0   3  165.58    8.30
 -16   0  -3   -2.20    1.80
  16   0   3   -0.90    2.40
 -17   0  -3  238.88   12.70
  17   0   3  269.27   12.50
 -18   0  -3   -1.50    2.00
  18   0   3    2.10    1.80
  19   0   3    9.00    2.10
 -19   0  -3    7.80    2.40
 -20   0  -3   -0.30    2.10
  20   0   3    0.20    1.90
 -21   0  -3    0.50    2.30
  21   0   3    0.70    2.10
 -22   0  -3   -0.60    2.30
  22   0   3    1.10    2.10
  23   0   3   22.60    3.60
 -23   0  -3   16.20    3.00
 -24   0  -3    1.40    2.70
  24   0   3   -0.60    2.30
  25   0   3   14.00    4.10
 -25   0  -3    1.00    3.30
 -27  -1   3   -1.30    2.80
  27  -1  -3    0.70    2.90
 -27   1   3    2.40    2.70
  27   1  -3    2.50    2.80
 -26  -1   3   19.00    3.80
  26  -1  -3   29.20    4.60
 -26   1   3   12.60    3.10
  25  -1  -3   16.60    3.00
 -25  -1   3   20.00    3.90
  25   1  -3   26.10    4.00
 -25   1   3   15.90    3.20
 -24  -1   3   39.50    4.30
  24  -1  -3   43.60    4.30
 -24   1   3   34.10    4.00
  24   1  -3   44.80    4.40
 -23  -1   3    2.20    2.50
  23  -1  -3    2.60    2.10
 -23   1   3    3.60    2.50
  23   1  -3    6.50    2.50
  22  -1  -3   17.10    2.60
 -22  -1   3   17.10    2.70
  22   1  -3   19.00    2.80
 -22   1   3   15.10    2.90
  21  -1  -3   40.40    3.90
 -21  -1   3   35.40    3.70
  21   1  -3   37.70    3.80
 -21   1   3   39.80    3.70
  20  -1  -3    7.70    2.00
 -20  -1   3    8.20    2.20
 -20   1   3   11.10    2.20
  20   1  -3    8.40    2.00
  19  -1  -3    8.40    2.00
 -19  -1   3    7.10    2.00
  19   1  -3    4.70    1.70
 -19   1   3    6.30    2.00
  18  -1  -3   71.59    4.50
 -18  -1   3   69.99    4.60
 -18   1   3   63.49    4.90
  18   1  -3   65.79    4.30
 -17  -1   3    9.70    1.90
  17  -1  -3    7.70    2.50
  17   1  -3    7.70    2.40
 -17   1   3    7.60    1.80
  16  -1  -3   10.50    1.90
 -16  -1   3    9.40    1.80
 -16   1   3   13.10    2.50
  16   1  -3    7.70    1.70
  15  -1  -3   99.69    5.80
 -15  -1   3  107.69    5.90
 -15   1   3  111.89    5.80
  15   1  -3   98.89    5.70
 -14  -1   3    0.90    1.40
  14  -1  -3    0.70    1.30
  14   1  -3    0.00    1.40
 -14   1   3    1.30    0.60
 -14   1   3    0.70    1.20
  13  -1  -3   81.49    4.70
 -13  -1   3   84.69    4.80
 -13   1   3   83.09    4.00
 -13   1   3   90.59    4.70
  13   1  -3   80.19    4.60
  12  -1  -3    2.80    1.30
 -12  -1   3    3.50    1.30
 -12   1   3    3.90    1.10
  12   1  -3    4.60    1.30
 -12   1   3    4.80    0.60
  11  -1  -3   84.29    4.60
 -11  -1   3   83.79    4.60
 -11   1   3   84.69    4.00
  11   1  -3   80.19    4.50
 -11   1   3   87.19    4.50
  10  -1  -3   72.59    3.90
 -10  -1   3   73.19    4.00
 -10   1   3   68.99    3.40
  10   1  -3   67.09    3.80
   9  -1  -3   44.20    2.80
  -9  -1   3   48.80    3.00
  -9   1   3   48.30    2.80
   9   1  -3   48.70    2.90
  -9   1   3   46.00    2.40
  -8  -1   3  417.96   18.50
   8  -1  -3  405.16   18.50
   8   1  -3  395.46   18.50
  -8   1   3  404.96   18.20
  -8   1   3  389.76   18.40
  -7  -1   3  270.97   13.30
   7  -1  -3  280.47   13.00
   7   1  -3  272.57   13.00
  -7   1   3  292.07   12.80
  -7   1   3  289.67   12.90
   6  -1  -3 1820.72   79.49
   6   1  -3 1709.53   79.19
   5  -1  -3   40.00    2.10
  -5  -1   3   35.80    2.10
   5   1  -3   33.90    2.10
   5   1  -3   32.10    1.80
  -5   1   3   39.80    2.00
  -5   1   3   37.90    1.90
  -4  -1   3   24.60    1.70
   4  -1  -3   27.10    1.70
   4   1  -3   27.70    1.40
  -4   1   3   27.10    1.60
   4   1  -3   24.20    1.60
   3  -1  -3    5.90    0.90
   3   1  -3    7.10    0.70
   3   1  -3    3.50    0.70
  -3   1   3    4.70    0.70
  -3   1   3    4.50    0.60
  -2  -1   3 3032.30  148.69
   2  -1  -3 3195.58  147.79
  -2  -1   3 2989.00  148.79
   2  -1  -3 3300.07  147.89
   2   1  -3 3194.98  148.69
  -2   1   3 3449.65  148.29
   1  -1  -3 1132.39   50.89
   0  -1  -3 1720.33   79.19
   0  -1   3 1645.94   84.89
   0  -1  -3 1821.42   80.69
   0  -1   3 1534.35   84.39
   0  -1   3 1694.73   78.79
   0  -1  -3 1947.51   80.49
   0   1  -3 1592.54   84.49
   0   1   3 1772.12   79.29
   0   1   3 1797.52   80.49
   0   1   3 1960.00   80.59
   0   1  -3 1601.64   84.79
   1  -1   3   79.09    3.70
   1  -1   3   80.09    3.90
  -1   1  -3   78.19    3.70
   1   1   3   78.29    3.60
   1   1   3   72.59    3.70
   1   1   3   77.79    4.10
   2  -1   3  403.56   18.80
   2  -1   3  417.26   18.90
   2   1   3  422.16   18.70
   2   1   3  420.86   19.10
   2   1   3  404.46   18.70
  -2   1  -3  417.16   18.80
   3  -1   3   10.50    1.10
   3  -1   3   11.20    1.40
  -3   1  -3    8.70    1.00
   3   1   3    9.30    1.70
   3   1   3    8.20    1.00
  -4  -1  -3  597.74   26.30
   4  -1   3  579.24   26.40
   4  -1   3  596.84   26.70
   4   1   3  562.74   26.80
  -4   1  -3  593.64   26.40
   4   1   3  571.34   26.40
   5  -1   3   37.80    2.50
   5  -1   3   36.10    2.20
  -5  -1  -3   40.20    1.90
  -5   1  -3   38.30    2.10
   5   1   3   36.70    2.20
   5   1   3   34.10    2.70
   6  -1   3   16.60    1.80
   6  -1   3   12.00    1.60
  -6  -1  -3   11.60    1.00
   6   1   3   14.40    1.40
   6   1   3   13.90    2.00
  -6   1  -3   13.20    1.20
   7  -1   3  157.08    7.50
   7  -1   3  155.28    7.70
  -7  -1  -3  149.19    7.10
  -7   1  -3  157.28    7.30
   7   1   3  163.88    7.90
   7   1   3  148.39    7.40
  -8  -1  -3   45.60    2.30
   8  -1   3   46.50    3.10
   8  -1   3   46.80    2.80
   8   1   3   45.70    2.70
   8   1   3   47.00    3.30
  -8   1  -3   43.40    2.50
  -9  -1  -3  176.08    8.40
   9  -1   3  182.68    8.80
   9  -1   3  183.88    9.10
   9   1   3  184.38    9.20
   9   1   3  185.48    8.80
  -9   1  -3  183.38    8.50
  10  -1   3   25.30    2.20
 -10  -1  -3   24.00    1.50
  10   1   3   25.90    2.70
  10   1   3   21.70    2.10
 -10   1  -3   24.10    1.70
 -11  -1  -3   38.20    2.10
  11  -1   3   37.10    2.80
  11   1   3   45.10    3.40
 -11   1  -3   41.50    2.40
  11   1   3   39.40    2.80
  12  -1   3   46.10    3.30
 -12  -1  -3   53.29    2.60
 -12   1  -3   49.80    2.80
  12   1   3   50.29    3.30
  13  -1   3   22.50    2.50
 -13   1  -3   21.90    1.80
  13   1   3   22.80    2.30
 -13   1  -3   14.50    2.90
 -14  -1  -3   -2.20    1.90
  14  -1   3   -0.10    1.40
  14   1   3    1.70    1.40
 -14   1  -3    2.90    1.00
 -14   1  -3   -3.00    1.60
 -15  -1  -3    4.40    2.10
  15  -1   3    5.50    1.70
 -15   1  -3    6.60    1.90
  15   1   3    8.00    1.70
 -16  -1  -3   61.69    5.20
 -16   1  -3   71.59    4.90
 -17  -1  -3    2.70    2.20
  17  -1   3    2.10    1.80
 -17   1  -3    1.20    2.00
  17   1   3    1.60    1.70
  18  -1   3   41.40    3.70
 -18  -1  -3   33.00    4.10
  18   1   3   40.10    3.60
 -18   1  -3   37.80    4.00
 -19  -1  -3   44.40    4.30
  19  -1   3   43.00    3.90
 -19   1  -3   42.00    4.10
  19   1   3   48.00    3.90
 -20  -1  -3   45.30    4.40
  20  -1   3   52.39    4.10
 -20   1  -3   42.30    4.50
  20   1   3   54.59    4.20
  21  -1   3   38.00    4.00
 -21  -1  -3   32.20    4.00
  21   1   3   37.20    3.80
 -21   1  -3   24.60    4.10
  22  -1   3   24.70    3.70
 -22  -1  -3   14.90    2.90
 -22   1  -3   17.80    3.00
  22   1   3   26.50    3.70
 -23  -1  -3   12.30    3.00
  23  -1   3   19.30    3.00
  23   1   3   27.10    3.90
 -23   1  -3   21.30    4.10
  24  -1   3    1.90    2.50
 -24  -1  -3    1.90    2.50
  24   1   3    2.00    2.60
 -24   1  -3    4.30    2.70
 -25  -1  -3    4.40    2.90
  25  -1   3    0.60    2.70
 -25   1  -3   -1.90    2.60
  25   1   3    2.90    3.20
  27  -2  -3   -0.50    2.70
 -27  -2   3    1.50    2.80
 -27   2   3   -1.00    2.80
  27   2  -3    3.20    2.90
  26  -2  -3    1.00    3.80
 -26   2   3    0.20    2.50
  26   2  -3   -3.40    4.20
  25  -2  -3   24.70    3.40
 -25  -2   3   10.40    3.10
  25   2  -3   26.10    4.20
 -25   2   3   12.40    3.00
  24  -2  -3   26.80    4.00
 -24  -2   3   22.40    3.80
  24   2  -3   27.20    4.00
 -24   2   3   17.90    3.20
 -23  -2   3    3.40    2.30
  23  -2  -3    4.30    2.20
 -23   2   3    3.10    2.40
  23   2  -3    2.40    2.40
 -22  -2   3   42.20    4.40
  22  -2  -3   42.70    4.00
  22   2  -3   45.70    4.20
 -22   2   3   38.10    4.30
  21  -2  -3    2.90    2.00
 -21  -2   3    5.50    2.20
  21   2  -3    3.50    2.20
 -21   2   3    1.70    2.10
  20  -2  -3   21.50    3.40
 -20  -2   3   25.60    3.30
 -20   2   3   18.80    3.40
  20   2  -3   26.20    3.40
  19  -2  -3   31.50    3.50
 -19  -2   3   29.00    3.60
 -19   2   3   35.50    3.40
  19   2  -3   34.30    3.50
  18  -2  -3   87.89    5.50
 -18  -2   3   92.89    5.60
  18   2  -3   85.39    5.30
 -18   2   3  101.59    6.40
 -17  -2   3    3.60    1.80
  17  -2  -3    1.30    1.90
 -17   2   3    2.60    1.60
  17   2  -3    2.30    1.90
  16  -2  -3    1.20    1.70
 -16  -2   3    1.10    1.60
  16   2  -3   -0.60    1.50
 -16   2   3    1.60    1.40
 -15  -2   3    1.20    1.50
  15  -2  -3    0.20    1.60
 -15   2   3    2.90    0.80
 -15   2   3    1.20    1.30
  15   2  -3    3.60    1.60
 -14  -2   3   60.69    4.10
  14  -2  -3   56.69    4.00
  14   2  -3   58.89    3.90
 -14   2   3   61.49    3.80
 -14   2   3   64.29    3.20
 -13  -2   3  112.89    6.00
  13  -2  -3  102.59    5.70
  13   2  -3  105.79    5.80
 -13   2   3  111.99    5.30
 -13   2   3  111.49    5.70
  12  -2  -3  807.62   35.80
 -12  -2   3  759.62   35.80
 -12   2   3  774.32   35.60
  12   2  -3  768.82   35.80
 -12   2   3  804.12   35.40
  11  -2  -3  118.99    6.10
 -11  -2   3  121.99    6.20
 -11   2   3  124.19    5.70
  11   2  -3  113.79    6.10
 -11   2   3  117.79    5.90
 -10  -2   3  269.87   13.00
  10  -2  -3  281.17   13.00
 -10   2   3  279.37   12.70
 -10   2   3  276.97   12.80
  10   2  -3  275.67   13.00
  -9  -2   3    9.00    1.80
   9  -2  -3    8.70    1.50
   9   2  -3   14.10    1.70
  -9   2   3   11.70    1.40
  -9   2   3   10.30    1.10
   8  -2  -3 1365.06   61.29
  -8  -2   3 1371.86   61.29
  -8   2   3 1373.06   61.09
   8   2  -3 1293.07   61.29
  -8   2   3 1378.96   61.19
   7  -2  -3  132.59    6.60
  -7  -2   3  137.89    6.60
  -7   2   3  139.59    6.40
   7   2  -3  134.69    6.20
  -7   2   3  139.19    6.40
   7   2  -3  128.39    6.60
  -6  -2   3  691.43   30.70
   6  -2  -3  671.13   30.60
   6   2  -3  638.44   30.70
  -6   2   3  691.93   30.50
  -6   2   3  688.53   30.60
   6   2  -3  671.33   30.40
  -5  -2   3  318.17   14.40
   5  -2  -3  308.07   14.40
  -5   2   3  305.57   14.30
   5   2  -3  322.37   14.50
  -5   2   3  314.77   14.30
   5   2  -3  315.57   14.20
   4  -2  -3   17.50    1.50
  -4  -2   3   21.60    1.40
  -4   2   3   15.80    1.30
   4   2  -3   20.90    1.20
   4   2  -3   18.60    1.50
  -4   2   3   16.40    1.30
   3  -2  -3  185.98    9.00
  -3  -2   3  203.28    8.90
  -3   2   3  195.18    8.90
   3   2  -3  193.58    8.90
  -3   2   3  188.88    8.90
   3   2  -3  193.58    9.00
   2  -2  -3   23.90    1.60
  -2  -2   3   26.70    1.40
  -2   2   3   21.10    1.60
  -2   2   3   20.60    1.50
   2   2  -3   21.20    1.70
   2   2  -3   22.60    1.50
  -1   2   3 1388.56   61.69
   1   2  -3 1349.07   61.69
   0  -2   3  312.97   14.60
   0   2   3  327.37   14.90
   0   2   3  327.17   14.70
   0   2  -3  315.17   14.60
   0   2   3  324.47   14.60
   1  -2   3 1675.53   87.19
   1  -2   3 1498.85   85.09
   1  -2   3 1744.83   76.19
  -1  -2  -3 1760.12   77.19
  -1   2  -3 1588.74   87.29
  -1   2  -3 1824.42   76.09
  -1   2  -3 1591.94   85.69
   2  -2   3   39.70    2.30
   2  -2   3   38.30    2.20
  -2   2  -3   39.20    2.20
   2   2   3   39.70    2.00
   2   2   3   39.30    2.60
   2   2   3   39.40    2.20
   3  -2   3   10.90    1.30
   3  -2   3   11.00    1.30
   3   2   3   10.00    1.10
   3   2   3   11.60    0.90
   3   2   3   11.80    1.70
  -3   2  -3   11.20    1.20
   4  -2   3    2.00    0.80
   4  -2   3    2.00    0.80
   4   2   3    2.00    0.70
  -4   2  -3    0.70    0.70
   4   2   3    1.40    0.50
   4   2   3    2.40    1.10
   5  -2   3   39.80    2.50
   5  -2   3   39.80    2.40
   5   2   3   42.40    2.10
   5   2   3   38.00    2.30
  -5   2  -3   40.90    2.30
   6  -2   3  168.78    8.10
   6  -2   3  174.88    8.20
  -6   2  -3  173.28    8.00
   6   2   3  166.78    8.50
   6   2   3  162.08    8.00
   7  -2   3    5.20    1.10
  -7  -2  -3    4.90    0.70
   7  -2   3    5.40    1.10
   7   2   3    5.30    1.50
  -7   2  -3    5.10    1.00
   7   2   3    5.40    1.00
   8  -2   3   42.40    2.70
   8  -2   3   41.20    2.90
  -8  -2  -3   42.90    2.20
  -8   2  -3   44.60    2.50
   8   2   3   41.20    3.20
   9  -2   3  151.28    7.20
  -9  -2  -3  139.09    6.70
   9   2   3  157.58    7.70
  -9   2  -3  122.79    7.50
   9   2   3  149.88    7.10
 -10  -2  -3  196.18    9.10
  10  -2   3  199.98    9.70
 -10   2  -3  205.28    9.50
  10   2   3  196.58   10.10
  10   2   3  201.28    9.60
  11  -2   3  184.78    9.40
 -11   2  -3  187.58    9.60
 -11   2  -3  197.88    9.20
  11   2   3  203.18    9.90
  11   2   3  189.38    9.40
  12  -2   3  106.59    5.90
  12   2   3  109.29    5.80
 -12   2  -3  105.99    6.00
 -12   2  -3  118.59    5.60
  13  -2   3    3.80    1.60
 -13   2  -3    2.40    1.60
 -13   2  -3    4.70    1.20
  13   2   3    3.00    1.40
  14  -2   3   97.19    5.70
 -14  -2  -3  102.39    6.50
 -14   2  -3  109.49    5.30
 -14   2  -3  102.89    5.90
  14   2   3   97.09    5.70
 -15  -2  -3    4.50    2.30
  15  -2   3    2.70    1.60
  15   2   3    3.80    1.60
 -15   2  -3    7.70    1.90
 -15   2  -3    7.30    1.40
  16  -2   3    3.50    1.80
 -16  -2  -3    0.10    2.20
 -16   2  -3    2.20    1.90
  16   2   3    3.10    1.90
 -17  -2  -3    4.80    2.30
  17  -2   3    8.20    2.10
 -17   2  -3    5.00    2.70
  17   2   3    5.20    1.90
  18  -2   3   28.70    3.40
 -18  -2  -3   23.60    3.80
 -18   2  -3   31.50    3.70
  18   2   3   31.80    3.40
 -19  -2  -3    2.90    2.20
  19  -2   3    8.80    2.70
 -19   2  -3    6.20    2.30
  19   2   3    9.20    2.10
 -20  -2  -3    0.50    2.30
  20  -2   3    4.30    2.30
  20   2   3   -0.30    1.90
 -20   2  -3    0.90    2.10
 -21  -2  -3   11.00    2.80
  21  -2   3   15.70    2.70
 -21   2  -3    8.40    2.60
  21   2   3   11.30    2.50
 -22  -2  -3    0.20    2.30
  22  -2   3    2.80    2.40
  22   2   3    0.80    2.30
 -22   2  -3   -1.20    2.50
 -23  -2  -3    2.20    2.60
  23  -2   3    1.50    2.60
  23   2   3    5.30    2.80
 -23   2  -3    0.70    2.40
 -24  -2  -3    8.80    2.80
  24  -2   3    9.20    2.80
 -24   2  -3    9.90    2.90
  24   2   3    8.60    2.90
  25  -2   3    9.90    2.90
 -25  -2  -3    7.50    2.90
 -25   2  -3    7.00    3.10
  25   2   3   10.40    3.10
 -26  -3   3    3.60    2.80
  26  -3  -3    2.80    2.80
  26   3  -3    7.00    3.20
 -26   3   3    4.20    2.80
 -25  -3   3   21.40    4.20
  25  -3  -3   15.50    2.90
  25   3  -3   16.70    3.10
 -25   3   3   14.80    3.20
  24  -3  -3   -1.30    2.30
 -24  -3   3   -0.90    2.30
  24   3  -3    0.40    2.50
 -24   3   3   -1.30    2.30
  23  -3  -3    9.30    2.40
 -23  -3   3    8.00    2.70
  23   3  -3    6.40    2.60
 -23   3   3    2.70    2.40
 -22  -3   3    2.70    2.20
  22  -3  -3    3.00    2.30
  22   3  -3    0.30    2.40
 -22   3   3   -2.50    2.30
  21  -3  -3    5.50    2.10
 -21  -3   3    8.20    2.30
  21   3  -3    8.40    2.60
 -21   3   3    7.60    2.40
 -20  -3   3   48.30    4.60
  20  -3  -3   51.09    4.20
 -20   3   3   54.69    4.30
  20   3  -3   55.59    4.20
  19  -3  -3   47.00    3.90
 -19  -3   3   43.20    4.00
 -19   3   3   45.30    3.80
  19   3  -3   43.80    4.00
 -18  -3   3   22.60    3.30
  18  -3  -3   21.80    3.20
  18   3  -3   12.70    2.20
 -18   3   3   20.20    3.00
  17  -3  -3   43.70    3.80
 -17  -3   3   44.10    3.80
 -17   3   3   42.10    3.50
  17   3  -3   46.90    3.80
 -16  -3   3    0.60    1.70
  16  -3  -3    1.40    1.70
 -16   3   3    1.80    1.00
  16   3  -3    1.40    1.70
 -16   3   3    1.10    1.50
 -15  -3   3   22.00    3.00
  15  -3  -3   23.80    2.90
  15   3  -3   21.00    2.90
 -15   3   3   23.30    2.00
 -15   3   3   24.60    2.60
 -14  -3   3   29.50    3.10
  14  -3  -3   33.00    3.00
 -14   3   3   26.70    2.20
 -14   3   3   33.10    2.70
  14   3  -3   30.50    3.00
  13  -3  -3   25.20    2.70
 -13  -3   3   20.50    2.80
 -13   3   3   27.30    2.30
  13   3  -3   18.90    2.40
 -13   3   3   24.90    1.90
 -12  -3   3  350.36   16.30
  12  -3  -3  337.17   16.20
 -12   3   3  348.67   16.00
  12   3  -3  343.27   16.30
 -12   3   3  348.27   16.00
  11  -3  -3  517.55   24.20
 -11  -3   3  526.75   24.30
 -11   3   3  534.05   24.00
  11   3  -3  521.05   24.30
 -11   3   3  529.05   24.00
 -10  -3   3   61.19    3.80
  10  -3  -3   66.09    3.70
  10   3  -3   57.99    3.60
 -10   3   3   63.19    3.40
 -10   3   3   58.09    3.30
  -9  -3   3  359.06   16.40
   9  -3  -3  348.77   16.30
   9   3  -3  320.07   15.80
   9   3  -3  351.26   16.40
  -9   3   3  371.26   16.10
  -9   3   3  355.06   16.10
  -8  -3   3  197.38    9.00
   8  -3  -3  175.78    9.10
  -8   3   3  177.48    8.70
   8   3  -3  181.58    8.90
  -8   3   3  193.08    8.70
   8   3  -3  185.98    8.50
   7  -3  -3 1832.92   82.99
  -7  -3   3 1827.82   82.99
  -7   3   3 1898.11   82.89
   7   3  -3 1806.82   83.09
  -6  -3   3    4.60    1.00
   6  -3  -3    7.20    1.20
  -6   3   3    3.70    0.80
   6   3  -3    5.90    0.90
  -6   3   3    4.40    0.90
   6   3  -3    4.00    1.00
  -5  -3   3  408.96   17.70
   5  -3  -3  383.56   17.80
   5   3  -3  391.16   17.60
  -5   3   3  394.76   17.60
  -5   3   3  366.66   17.70
   5   3  -3  375.16   17.80
   4  -3  -3   46.70    2.70
  -4  -3   3   48.50    2.50
   4   3  -3   45.40    2.50
  -4   3   3   47.80    2.50
   4   3  -3   42.70    2.70
  -4   3   3   45.30    2.50
   3  -3  -3   62.09    3.30
  -3  -3   3   65.79    3.10
  -3   3   3   62.29    3.20
  -3   3   3   61.69    3.20
   3   3  -3   62.09    3.40
   3   3  -3   56.69    3.10
  -2  -3   3  699.83   32.10
   2  -3  -3  743.93   32.30
   2   3  -3  674.53   32.20
   2   3  -3  716.23   32.30
  -2   3   3  711.53   32.20
  -2   3   3  723.53   32.30
  -1  -3   3  365.46   16.70
   1   3  -3  380.36   17.00
  -1   3   3  381.86   17.00
  -1   3   3  351.76   16.90
   1   3  -3  371.96   16.90
   0  -3   3  719.23   32.00
   0   3   3  679.43   32.10
   0   3   3  729.63   32.20
   0   3  -3  680.23   32.20
   0   3   3  743.73   32.30
   1  -3   3   77.39    4.20
  -1   3  -3   83.29    4.10
   1   3   3   82.49    4.00
   1   3   3   80.39    4.30
   1   3   3   84.59    4.10
   2  -3   3   73.89    3.70
   2  -3   3   78.59    4.10
   2   3   3   77.29    4.30
  -2   3  -3   74.39    3.90
   2   3   3   81.59    4.00
   2   3   3   81.89    3.80
   3  -3   3  635.14   27.70
   3  -3   3  599.74   27.50
   3   3   3  617.04   28.00
  -3   3  -3  604.74   27.60
   3   3   3  592.34   27.50
   3   3   3  602.04   27.70
   4  -3   3    4.50    1.10
   4  -3   3    5.70    1.00
  -4   3  -3    4.30    1.10
   4   3   3    4.50    0.70
   4   3   3    6.80    1.30
   4   3   3    4.60    0.90
   5  -3   3 1282.17   57.69
   5  -3   3 1307.97   57.69
  -5   3  -3 1259.57   57.59
   5   3   3 1266.77   57.69
   5   3   3 1277.87   57.99
   5   3   3 1266.07   57.49
   6  -3   3  185.08    8.90
  -6   3  -3  183.28    8.80
   6   3   3  183.58    8.90
   6   3   3  195.38    8.60
   6   3   3  182.78    9.30
   7  -3   3   11.20    1.70
   7   3   3    9.40    1.00
   7   3   3    9.30    1.70
   7   3   3    5.60    1.20
  -7   3  -3    6.70    1.20
   8  -3   3   28.80    2.40
  -8   3  -3   31.20    2.20
   8   3   3   29.00    2.90
   8   3   3   33.00    2.30
   9  -3   3  110.89    5.70
  -9  -3  -3  111.09    5.20
   9   3   3  109.09    6.10
   9   3   3  106.69    5.60
  -9   3  -3  110.39    5.70
  -9   3  -3  104.59    5.50
  10  -3   3    2.40    1.30
 -10  -3  -3    1.60    0.70
 -10   3  -3    1.20    1.10
  10   3   3    3.00    1.50
 -10   3  -3    3.10    1.00
  10   3   3    1.60    1.10
  11  -3   3   75.59    4.30
 -11  -3  -3   64.39    3.50
  11   3   3   81.89    5.00
 -11   3  -3   75.59    4.40
  11   3   3   76.89    4.30
 -11   3  -3   69.79    4.20
  12  -3   3    2.80    1.50
 -12   3  -3    3.80    1.40
  12   3   3    4.40    1.40
 -12   3  -3    3.40    1.20
  13  -3   3   10.40    2.00
 -13   3  -3   11.70    1.90
  13   3   3   10.60    1.90
 -13   3  -3   12.40    1.90
  14  -3   3   52.09    3.90
 -14  -3  -3   53.99    4.90
 -14   3  -3   61.49    3.60
 -14   3  -3   56.59    4.00
  14   3   3   54.99    3.90
 -15  -3  -3    0.00    2.30
 -15   3  -3    0.20    1.50
  15   3   3   -0.90    1.60
 -15   3  -3    0.30    1.30
  16  -3   3    4.20    1.90
 -16  -3  -3    3.60    2.40
 -16   3  -3    4.70    1.80
  16   3   3    2.30    1.70
 -16   3  -3    4.90    1.70
  17  -3   3   99.09    5.90
 -17  -3  -3   95.89    6.20
  17   3   3   99.89    5.90
 -17   3  -3   90.89    6.00
  18  -3   3   44.70    3.80
 -18  -3  -3   28.80    4.20
  18   3   3   41.70    3.70
 -18   3  -3   39.20    3.80
  19  -3   3    6.60    2.10
 -19  -3  -3    2.90    2.40
 -19   3  -3    8.70    2.30
  19   3   3    9.50    2.40
 -20  -3  -3   -1.40    2.20
  20  -3   3    0.80    2.20
  20   3   3    2.30    2.40
 -20   3  -3   -2.70    2.20
 -21  -3  -3    2.10    2.40
  21  -3   3    4.00    2.60
  21   3   3    0.70    2.50
 -21   3  -3    0.60    2.20
  22  -3   3   14.10    2.90
 -22  -3  -3    8.00    2.70
  22   3   3   11.80    2.80
 -22   3  -3    6.60    2.60
 -23  -3  -3    6.70    2.80
  23  -3   3   17.20    3.10
 -23   3  -3    5.30    2.80
  23   3   3   11.40    2.90
 -24  -3  -3    1.90    3.70
  24  -3   3    2.60    2.80
  24   3   3    3.50    2.90
  25  -3   3   30.20    4.50
 -25  -3  -3   26.90    4.40
 -25   3  -3   17.00    3.40
  25   3   3   24.10    4.00
 -26  -4   3   -0.50    2.60
  26  -4  -3   -0.90    2.60
 -26   4   3    4.60    2.80
  26   4  -3   -3.30    3.10
  25  -4  -3   15.50    3.80
 -25  -4   3   18.70    4.10
 -25   4   3   24.30    4.20
  25   4  -3   13.60    3.50
  24  -4  -3   -0.60    2.70
 -24  -4   3    1.80    2.50
  24   4  -3    1.40    2.70
 -24   4   3    3.20    2.40
 -23  -4   3   29.10    4.40
  23  -4  -3   36.10    4.10
  23   4  -3   25.50    4.10
 -23   4   3   19.20    3.90
  22  -4  -3   -2.60    2.40
 -22  -4   3    3.00    2.40
 -22   4   3   -3.40    2.30
  22   4  -3   -1.50    2.60
 -21  -4   3    3.60    2.30
  21  -4  -3    4.60    2.50
  21   4  -3    2.60    2.30
 -21   4   3    0.40    2.00
  20  -4  -3    4.50    2.10
 -20  -4   3    1.10    2.10
  20   4  -3    3.70    2.40
 -20   4   3   -0.70    2.00
  19  -4  -3   -0.70    1.90
 -19  -4   3    4.10    2.10
  19   4  -3    1.30    2.10
 -19   4   3   -2.10    1.80
 -18  -4   3   16.20    3.20
  18  -4  -3   10.50    2.40
 -18   4   3   12.30    2.20
  18   4  -3   11.50    2.30
 -17  -4   3  136.69    7.90
  17  -4  -3  145.89    7.80
  17   4  -3  144.59    7.90
 -17   4   3  162.68    7.40
 -17   4   3  136.49    7.60
 -16  -4   3  520.25   25.20
  16  -4  -3  555.64   25.10
  16   4  -3  504.65   25.10
 -16   4   3  542.05   24.80
 -16   4   3  564.14   24.80
 -15  -4   3  150.88    8.20
  15  -4  -3  154.58    8.10
 -15   4   3  162.78    7.80
 -15   4   3  155.38    7.90
  15   4  -3  158.98    8.30
  14  -4  -3  439.86   21.20
 -14  -4   3  478.65   21.40
 -14   4   3  464.95   21.00
  14   4  -3  446.76   21.30
 -14   4   3  443.46   21.00
 -13  -4   3  256.77   12.90
  13  -4  -3  264.07   12.90
 -13   4   3  269.27   12.60
  13   4  -3  272.47   13.00
 -13   4   3  271.67   12.60
 -12  -4   3  437.76   20.40
  12  -4  -3  427.76   20.30
  12   4  -3  431.56   20.40
 -12   4   3  448.06   20.10
 -12   4   3  438.16   20.10
  11  -4  -3   37.00    3.10
 -11  -4   3   43.60    3.30
  11   4  -3   40.80    2.10
  11   4  -3   38.80    3.20
 -11   4   3   42.80    2.70
 -11   4   3   49.70    3.60
  10  -4  -3    6.70    1.60
 -10  -4   3    9.60    1.60
 -10   4   3    8.50    1.20
 -10   4   3    7.90    1.10
  10   4  -3    7.80    0.90
  10   4  -3    8.00    1.60
  -9  -4   3    8.50    1.40
   9  -4  -3    6.10    1.40
   9   4  -3    9.00    1.60
   9   4  -3    9.00    1.00
  -9   4   3    8.50    1.40
  -8  -4   3  411.46   18.50
   8  -4  -3  386.66   18.50
   8   4  -3  398.06   18.50
   8   4  -3  408.16   18.20
  -8   4   3  387.36   18.20
   7  -4  -3   19.80    1.90
  -7  -4   3   24.90    2.00
  -7   4   3   18.40    1.70
  -7   4   3   19.20    1.60
   7   4  -3   26.00    2.20
   7   4  -3   22.90    1.60
   6  -4  -3   50.39    3.00
  -6  -4   3   43.30    2.70
  -6   4   3   41.00    2.60
   6   4  -3   42.60    3.00
   6   4  -3   44.70    2.50
  -6   4   3   46.70    2.50
  -5  -4   3   39.20    2.40
   5  -4  -3   35.60    2.60
   5   4  -3   37.30    2.20
  -5   4   3   36.00    2.30
  -5   4   3   38.10    2.20
   5   4  -3   38.00    2.60
   4  -4  -3   78.69    4.20
  -4  -4   3   78.49    3.90
  -4   4   3   76.29    4.00
   4   4  -3   77.59    3.90
  -4   4   3   77.79    4.00
   4   4  -3   79.79    4.30
  -3  -4   3   -0.30    0.60
   3  -4  -3    1.20    1.10
  -3   4   3    1.20    0.90
   3   4  -3   -0.60    0.80
  -3   4   3    0.70    0.80
   3   4  -3    0.30    1.00
   2  -4  -3   57.69    3.50
  -2  -4   3   61.79    2.90
  -2   4   3   61.89    3.30
   2   4  -3   58.69    3.20
   2   4  -3   59.39    3.40
  -2   4   3   55.79    3.10
  -1  -4   3   25.90    1.30
  -1   4   3   21.30    1.80
   1   4  -3   22.50    2.10
  -1   4   3   23.90    1.90
   0   4   3  160.78    7.90
   0   4  -3  153.98    7.80
   0   4   3  176.08    7.80
   0   4   3  164.78    7.90
   1  -4   3    1.20    1.10
   1   4   3    1.20    1.00
  -1   4  -3    1.00    0.90
   1   4   3    0.80    1.00
   2  -4   3   50.89    3.00
  -2   4  -3   45.20    2.80
   2   4   3   48.10    3.00
   2   4   3   47.50    2.70
   3  -4   3   20.70    2.10
   3   4   3   20.20    1.50
   3   4   3   22.20    2.10
  -3   4  -3   22.00    1.90
   3   4   3   21.20    1.90
   4  -4   3  473.45   21.70
  -4   4  -3  462.45   21.60
   4   4   3  471.15   21.90
  -4   4  -3  470.55   21.30
   4   4   3  477.75   21.70
   4   4   3  471.05   21.40
   5  -4   3  231.28   11.40
  -5   4  -3  243.18   11.30
   5   4   3  238.28   11.10
  -5   4  -3  244.28   11.00
   5   4   3  242.48   11.30
   5   4   3  235.48   11.60
   6  -4   3  516.35   23.20
  -6   4  -3  544.65   23.00
   6   4   3  491.35   22.90
   6   4   3  501.15   23.20
  -6   4  -3  469.05   23.30
   7  -4   3   16.30    2.00
  -7   4  -3   15.90    1.50
   7   4   3   15.60    2.30
   7   4   3   14.80    1.80
  -7   4  -3   12.70    1.60
   7   4   3   13.10    1.30
   8  -4   3    2.20    1.30
  -8   4  -3    3.10    1.10
  -8   4  -3    3.00    0.90
   8   4   3    5.60    1.30
   8   4   3    3.80    0.80
   8   4   3    3.70    1.60
   9  -4   3    9.40    1.60
  -9   4  -3   13.30    1.70
   9   4   3   11.00    1.30
  -9   4  -3   10.30    1.50
   9   4   3   12.90    2.50
   9   4   3   11.30    1.70
  10  -4   3  166.08    8.40
  10   4   3  166.48    8.40
 -10   4  -3  168.28    8.60
 -10   4  -3  171.28    8.20
  10   4   3  168.68    8.80
 -11  -4  -3   34.10    2.30
  11  -4   3   35.60    3.10
  11   4   3   38.70    3.20
 -11   4  -3   39.30    2.80
 -11   4  -3   43.30    2.80
  12  -4   3   32.10    3.00
 -12   4  -3   30.50    2.50
  12   4   3   31.90    3.00
 -12   4  -3   29.90    2.80
  13  -4   3   53.29    3.90
  13   4   3   51.49    3.80
 -13   4  -3   55.09    3.50
 -13   4  -3   52.39    3.60
  14  -4   3   75.89    4.60
 -14  -4  -3   59.29    5.30
 -14   4  -3   69.49    4.40
 -14   4  -3   72.29    4.30
  14   4   3   68.89    4.60
 -15  -4  -3  109.39    7.20
  15  -4   3  116.79    6.70
  15   4   3  117.19    6.80
 -15   4  -3  124.29    6.60
 -15   4  -3  126.99    6.40
  16  -4   3   38.70    3.60
 -16  -4  -3   29.90    4.40
 -16   4  -3   47.20    3.30
  16   4   3   39.10    3.80
 -16   4  -3   40.80    3.60
 -17  -4  -3   36.20    4.40
  17  -4   3   46.60    3.90
  17   4   3   43.70    4.00
 -17   4  -3   37.10    3.80
  18  -4   3    7.30    2.20
 -18  -4  -3    6.40    2.60
  18   4   3    5.50    2.20
 -18   4  -3    7.30    2.20
 -19  -4  -3   -0.80    2.20
  19  -4   3    1.00    2.10
  19   4   3    1.20    2.30
 -19   4  -3    1.00    2.10
 -20  -4  -3   -0.90    2.30
  20  -4   3    0.50    2.50
  20   4   3    0.30    2.30
 -20   4  -3   -3.50    2.00
  21  -4   3   12.40    2.60
 -21  -4  -3   12.20    2.90
  21   4   3   15.00    3.20
 -21   4  -3    7.80    2.70
 -22  -4  -3    0.10    2.50
  22  -4   3    4.20    2.50
  22   4   3    5.30    2.90
 -22   4  -3   -5.70    2.60
  23  -4   3    3.70    2.90
 -23  -4  -3    4.60    2.70
 -23   4  -3   -4.60    2.60
  23   4   3    3.40    2.80
 -24  -4  -3    3.20    2.80
  24  -4   3    8.60    3.50
 -24   4  -3    0.40    3.00
  25  -5  -3    7.20    3.00
 -25  -5   3    4.10    2.90
  25   5  -3    7.30    3.40
 -25   5   3   13.30    3.80
  24  -5  -3   40.00    4.70
 -24  -5   3   36.10    4.70
 -24   5   3   44.60    4.90
  24   5  -3   39.70    5.00
 -23  -5   3    0.00    2.60
  23  -5  -3   -5.10    2.60
 -23   5   3    8.10    2.80
  23   5  -3    4.40    2.90
 -22  -5   3    1.90    2.50
  22  -5  -3    4.50    2.70
  22   5  -3   -0.60    2.90
 -22   5   3    8.60    2.50
  21  -5  -3    1.50    2.40
 -21  -5   3    3.90    2.50
  21   5  -3    4.00    2.60
 -21   5   3    9.20    2.40
 -20  -5   3   47.90    4.40
  20  -5  -3   45.50    4.50
 -20   5   3   44.10    4.00
  20   5  -3   38.10    4.40
  19  -5  -3   24.50    3.70
 -19  -5   3   21.90    3.50
  19   5  -3   25.50    3.90
 -19   5   3   26.30    3.30
  18  -5  -3   99.99    5.90
 -18  -5   3   90.79    5.80
 -18   5   3   93.59    5.50
  18   5  -3   91.99    6.00
  17  -5  -3   60.79    4.60
 -17  -5   3   59.29    4.50
 -17   5   3   61.49    4.10
 -17   5   3   66.09    4.10
  17   5  -3   59.29    4.70
 -16  -5   3   17.40    3.10
  16  -5  -3   22.10    3.30
 -16   5   3   20.80    2.60
  16   5  -3   16.40    2.60
 -16   5   3   21.00    2.50
  15  -5  -3   55.69    4.30
 -15  -5   3   52.39    4.30
  15   5  -3   52.79    4.40
 -15   5   3   62.49    3.70
 -15   5   3   60.79    3.70
 -14  -5   3   14.00    2.80
  14  -5  -3   10.90    2.10
 -14   5   3   10.70    1.60
 -14   5   3   13.00    2.10
  14   5  -3   11.80    2.30
 -13  -5   3    2.30    1.60
  13  -5  -3    4.30    1.70
 -13   5   3    3.60    1.30
  13   5  -3    0.70    1.70
 -13   5   3    3.10    1.20
  12  -5  -3   67.99    4.70
 -12  -5   3   78.99    4.70
  12   5  -3   75.69    4.80
 -12   5   3   77.99    4.20
 -12   5   3   77.19    4.30
 -11  -5   3    1.40    1.40
  11  -5  -3    1.20    1.50
 -11   5   3    1.50    1.10
  11   5  -3    0.40    1.50
 -11   5   3    3.80    1.10
  11   5  -3    4.20    0.80
  10  -5  -3    0.30    1.50
 -10  -5   3    0.20    1.30
 -10   5   3    1.90    0.90
  10   5  -3   -0.10    0.70
  10   5  -3    1.90    1.40
 -10   5   3    0.30    1.00
   9  -5  -3  119.69    6.20
  -9  -5   3  121.39    6.10
   9   5  -3  112.89    6.20
   9   5  -3  116.79    5.60
  -9   5   3  115.59    5.80
  -9   5   3  112.99    5.90
  -8  -5   3  242.88   11.30
   8  -5  -3  239.38   11.30
   8   5  -3  228.28   11.40
  -8   5   3  235.48   11.00
   8   5  -3  230.98   11.00
  -8   5   3  238.48   11.20
   7  -5  -3  103.49    5.40
  -7  -5   3  110.39    5.30
  -7   5   3   93.89    5.10
   7   5  -3   98.29    5.50
   7   5  -3   88.29    5.10
  -7   5   3  106.29    5.00
   6  -5  -3  761.42   34.50
  -6  -5   3  784.92   34.30
  -6   5   3  724.43   34.30
   6   5  -3  733.13   34.50
   6   5  -3  748.83   34.30
  -6   5   3  775.52   34.30
  -5  -5   3  465.25   20.20
   5  -5  -3  452.15   20.50
  -5   5   3  447.36   20.20
  -5   5   3  414.06   20.20
   5   5  -3  441.76   20.50
   5   5  -3  428.16   20.20
   4  -5  -3  265.07   12.90
  -4  -5   3  278.17   12.60
   4   5  -3  270.27   12.70
   4   5  -3  280.77   13.00
  -4   5   3  270.47   12.80
  -4   5   3  277.67   12.70
  -3  -5   3   68.59    3.40
   3  -5  -3   67.49    4.00
   3   5  -3   65.79    4.00
   3   5  -3   67.19    3.60
  -3   5   3   68.79    3.60
  -3   5   3   63.69    3.60
  -2  -5   3  218.18    9.90
   2  -5  -3  216.68   10.40
   2   5  -3  207.08   10.20
  -2   5   3  222.78   10.20
  -2   5   3  211.48   10.20
   2   5  -3  218.88   10.40
   1  -5  -3   23.50    2.30
  -1  -5   3   24.00    1.30
  -1   5   3   23.70    1.90
   1   5  -3   20.70    2.30
   1   5  -3   21.70    1.90
   0   5   3  390.36   18.30
   0   5   3  402.76   18.30
   0   5   3  389.56   18.10
   1  -5   3   10.00    1.60
   1   5   3    8.10    1.40
   1   5   3    8.50    1.60
  -1   5  -3    8.30    1.30
   1   5   3    8.90    1.40
   2  -5   3   94.19    5.00
   2   5   3   90.59    4.90
   2   5   3   87.39    4.60
   2   5   3   95.09    5.00
  -2   5  -3   92.99    4.80
   3  -5   3    0.10    1.10
   3   5   3   -0.30    0.70
  -3   5  -3   -1.60    1.00
   3   5   3    1.30    1.10
   4  -5   3  184.88    9.20
   4   5   3  190.98    8.90
  -4   5  -3  189.08    9.00
   4   5   3  186.78    9.20
   4   5   3  191.08    9.40
   5  -5   3  146.99    7.40
  -5   5  -3  145.29    7.30
   5   5   3  146.39    7.40
   5   5   3  151.88    7.10
   5   5   3  148.39    7.60
   6  -5   3   -0.30    1.20
   6   5   3    0.80    1.10
  -6   5  -3   -0.40    0.60
   6   5   3   -0.10    1.20
   6   5   3    0.50    0.70
  -6   5  -3   -0.30    1.00
   7  -5   3   42.90    3.00
   7   5   3   41.80    3.20
   7   5   3   32.80    2.30
   7   5   3   37.90    2.90
  -7   5  -3   40.60    2.20
  -7   5  -3   41.10    2.70
   8  -5   3  252.97   12.30
   8   5   3  249.48   12.60
   8   5   3  259.87   11.90
   8   5   3  253.07   12.30
  -8   5  -3  260.27   12.20
  -8   5  -3  264.07   11.90
   9  -5   3  123.29    6.40
   9   5   3  115.79    6.40
   9   5   3  119.09    6.70
  -9   5  -3  124.69    6.20
  -9   5  -3  119.19    6.10
  10  -5   3    1.20    1.40
  10   5   3    1.80    1.60
  10   5   3    0.70    1.50
 -10   5  -3    0.60    1.20
 -10   5  -3   -0.50    1.00
  10   5   3    1.90    0.90
  11  -5   3   -0.20    1.60
 -11   5  -3   -1.60    1.20
  11   5   3    0.20    1.50
  12  -5   3    1.40    1.60
  12   5   3   -0.20    1.50
 -12   5  -3   -0.70    1.10
 -12   5  -3    0.80    1.30
  13  -5   3    0.60    1.70
  13   5   3    0.40    1.70
 -13   5  -3   -0.20    1.40
  14  -5   3   21.50    2.60
 -14  -5  -3   19.40    3.30
 -14   5  -3   19.10    2.50
 -14   5  -3   15.30    2.50
 -15  -5  -3   22.70    3.30
  15  -5   3   36.70    3.50
 -15   5  -3   36.10    3.10
  15   5   3   30.10    3.50
 -15   5  -3   26.50    3.00
 -16  -5  -3   -3.80    2.30
  16  -5   3    0.60    1.90
 -16   5  -3    2.70    1.80
 -16   5  -3   -1.20    1.70
  16   5   3   -2.10    2.00
 -17  -5  -3   -2.90    2.50
  17  -5   3    1.90    2.10
 -17   5  -3   -0.80    1.80
  17   5   3   -1.20    2.20
 -17   5  -3    3.50    1.80
 -18  -5  -3   -0.20    2.40
  18  -5   3    0.50    2.10
  18   5   3    1.80    2.40
 -18   5  -3    1.00    2.10
 -19  -5  -3    1.70    2.50
  19  -5   3    0.00    2.20
  19   5   3    0.50    2.30
  20  -5   3   27.70    4.10
 -20  -5  -3   33.00    4.30
  20   5   3   29.10    4.30
 -20   5  -3   20.30    3.30
 -21  -5  -3    8.20    2.90
  21  -5   3   11.10    2.80
  21   5   3    8.20    3.10
 -21   5  -3    7.10    2.80
 -22  -5  -3    6.30    2.80
  22  -5   3   10.90    2.80
 -22   5  -3    5.90    3.40
  22   5   3   18.80    3.60
  23  -5   3   21.60    3.80
 -23  -5  -3   12.10    3.70
  23   5   3   13.30    3.20
  24  -5   3   37.00    4.30
 -24  -5  -3   27.40    4.70
  24   5   3   32.80    4.90
 -25  -6   3   -0.20    2.80
  25  -6  -3    3.20    3.30
  25   6  -3   -1.90    3.30
  24  -6  -3    8.00    5.00
 -24  -6   3    2.60    5.00
  24   6  -3    1.60    4.30
 -23  -6   3   42.30    4.80
  23  -6  -3   55.19    5.10
  23   6  -3   47.50    5.40
  22  -6  -3    2.90    2.90
 -22  -6   3    2.40    2.80
  22   6  -3    1.80    3.00
  21  -6  -3    5.40    2.80
 -21  -6   3    3.80    2.70
  21   6  -3    6.00    3.00
 -20  -6   3    5.80    2.60
  20  -6  -3    5.90    2.60
  20   6  -3    4.20    2.60
  19  -6  -3   95.19    6.10
 -19  -6   3   88.89    6.10
 -19   6   3  103.39    6.50
  19   6  -3   90.19    6.30
 -18  -6   3   34.20    3.90
  18  -6  -3   35.20    4.20
  18   6  -3   34.30    4.30
 -18   6   3   50.29    3.90
 -18   6   3   40.60    3.60
  17  -6  -3   69.59    5.10
 -17  -6   3   71.99    5.20
  17   6  -3   77.69    5.50
 -17   6   3   93.69    5.10
 -17   6   3   79.99    5.00
  16  -6  -3   12.10    2.50
 -16  -6   3   15.80    3.20
 -16   6   3   19.50    2.60
  16   6  -3   13.30    2.40
 -15  -6   3   32.70    3.70
  15  -6  -3   35.60    3.70
 -15   6   3   44.40    3.20
 -15   6   3   34.60    3.00
  15   6  -3   30.50    3.70
  14  -6  -3   -0.50    1.90
 -14  -6   3    0.60    1.80
 -14   6   3    0.10    1.40
  14   6  -3   -0.30    1.90
 -13  -6   3   13.00    2.20
  13  -6  -3    8.10    2.20
  13   6  -3    8.80    2.00
 -13   6   3    6.60    1.50
  12  -6  -3   30.00    3.00
 -12  -6   3   27.80    3.10
  12   6  -3   27.90    2.40
 -12   6   3   25.10    2.60
  12   6  -3   28.90    3.30
  11  -6  -3  181.18    9.10
 -11  -6   3  187.48    9.00
  11   6  -3  158.68    8.50
 -11   6   3  177.18    8.70
 -11   6   3  186.18    8.70
  11   6  -3  171.18    9.00
 -10  -6   3   25.60    2.80
  10  -6  -3   23.60    2.90
  10   6  -3   25.80    2.00
 -10   6   3   28.10    2.40
 -10   6   3   23.70    2.40
  10   6  -3   27.60    2.90
   9  -6  -3    5.60    1.60
  -9  -6   3    8.90    1.70
  -9   6   3   11.80    1.60
   9   6  -3    7.90    1.20
   9   6  -3    7.20    1.90
  -9   6   3    8.80    1.50
  -8  -6   3   32.40    2.60
   8  -6  -3   31.40    2.90
  -8   6   3   34.40    2.30
   8   6  -3   31.40    2.90
  -8   6   3   28.30    2.50
   8   6  -3   29.40    2.20
  -7  -6   3   51.39    3.10
   7  -6  -3   50.49    3.60
  -7   6   3   44.80    3.00
  -7   6   3   56.89    3.00
   7   6  -3   41.90    3.40
  -6  -6   3   25.40    2.30
   6  -6  -3   28.80    2.70
   6   6  -3   32.50    2.90
  -6   6   3   31.90    2.10
   6   6  -3   24.50    2.10
  -6   6   3   27.30    2.20
   5  -6  -3    3.50    1.40
  -5  -6   3    3.90    1.00
   5   6  -3    3.00    1.10
  -5   6   3    6.20    1.20
   5   6  -3    3.20    1.50
  -5   6   3    7.40    1.40
   4  -6  -3    1.40    1.30
  -4  -6   3    1.10    0.80
   4   6  -3   -0.10    0.90
  -4   6   3    2.10    0.80
  -4   6   3    1.50    1.10
   4   6  -3    1.10    1.40
   3  -6  -3    0.80    1.30
  -3  -6   3    0.70    0.70
  -3   6   3    1.50    0.90
  -3   6   3    0.50    0.80
   3   6  -3    1.50    1.00
   3   6  -3    1.10    1.30
   2  -6  -3   59.99    3.80
  -2  -6   3   58.69    3.00
  -2   6   3   60.99    3.40
   2   6  -3   63.29    3.90
  -2   6   3   62.99    3.30
   2   6  -3   58.49    3.50
   1  -6  -3    0.50    1.20
  -1   6   3    0.30    0.90
   1   6  -3    0.30    1.30
  -1   6   3   -0.50    0.90
   1   6  -3   -0.90    0.90
   0  -6   3    1.00    1.30
   0   6   3    0.00    1.00
   0   6   3   -0.90    0.90
   0   6  -3    0.80    1.00
   1  -6   3   42.90    3.20
  -1   6  -3   48.50    2.90
   1   6   3   42.40    3.10
   1   6   3   41.30    2.90
   1   6   3   41.30    2.70
   2  -6   3    0.40    1.30
  -2   6  -3    0.60    1.10
   2   6   3    0.00    0.90
   2   6   3    0.70    1.00
   2   6   3   -0.80    1.10
   3  -6   3   69.49    4.10
   3   6   3   70.39    4.10
  -3   6  -3   64.69    3.80
   3   6   3   67.49    3.70
   3   6   3   67.49    4.10
   4  -6   3   12.90    2.20
   4   6   3   13.30    1.50
   4   6   3   14.90    2.20
   4   6   3   15.50    2.00
  -4   6  -3   13.20    1.80
   5  -6   3  129.89    6.80
   5   6   3  127.59    6.80
   5   6   3  127.29    6.80
   5   6   3  131.89    6.30
  -5   6  -3  128.59    6.60
   6  -6   3    2.30    1.50
  -6   6  -3    2.20    1.20
   6   6   3    1.80    0.90
   6   6   3    2.30    1.40
   6   6   3    2.50    1.40
   7  -6   3  242.08   11.70
   7   6   3  241.98   11.70
   7   6   3  245.28   11.90
   7   6   3  230.08   11.30
  -7   6  -3  243.48   11.50
   8  -6   3    0.00    1.40
   8   6   3    2.00    1.50
   8   6   3    0.30    1.50
  -8   6  -3    0.50    1.30
  -8   6  -3   -0.20    0.70
   9  -6   3   45.60    3.40
  -9   6  -3   45.90    2.70
  -9   6  -3   46.80    3.20
   9   6   3   42.30    3.60
   9   6   3   48.50    2.90
  10  -6   3    7.10    1.80
 -10   6  -3    9.60    1.80
 -10   6  -3    9.40    1.70
  10   6   3    7.40    1.90
  10   6   3   10.50    1.70
  11  -6   3   69.39    4.50
 -11   6  -3   63.99    4.10
 -11   6  -3   64.99    3.80
  11   6   3   67.39    3.80
  11   6   3   67.09    4.50
 -12  -6  -3   -0.70    2.20
 -12   6  -3    0.60    1.50
 -12   6  -3   -2.00    1.50
  12   6   3    1.40    1.80
  13  -6   3   58.49    4.20
 -13  -6  -3   43.10    6.40
 -13   6  -3   47.10    3.50
 -13   6  -3   61.09    3.90
  13   6   3   54.99    4.40
 -14  -6  -3   -0.20    2.40
  14  -6   3    3.80    1.90
 -14   6  -3    5.50    1.80
  14   6   3    2.60    2.00
 -14   6  -3   -0.90    1.70
  15  -6   3  187.08    9.80
 -15  -6  -3  187.68   10.30
  15   6   3  184.28   10.00
 -15   6  -3  204.18    9.70
 -16  -6  -3   41.30    4.90
  16  -6   3   44.70    4.20
  16   6   3   46.80    4.30
 -16   6  -3   48.90    4.00
  17  -6   3   35.00    4.10
 -17  -6  -3   28.70    4.70
 -17   6  -3   42.90    4.40
  17   6   3   36.40    4.20
 -18  -6  -3   -2.10    2.50
  18  -6   3    0.70    2.30
  18   6   3    0.90    2.70
 -18   6  -3   -2.80    2.20
  19  -6   3    2.10    2.40
 -19  -6  -3    0.30    2.70
  19   6   3    7.90    3.00
  20  -6   3    0.50    2.70
 -20  -6  -3   -0.40    2.60
  20   6   3    3.30    2.90
 -21  -6  -3    7.20    3.00
  21  -6   3   -0.80    2.60
  21   6   3    5.30    3.00
  22  -6   3   -1.10    2.80
 -22  -6  -3   -0.30    2.80
  22   6   3    4.60    3.50
  23  -6   3    0.60    2.90
 -23  -6  -3    0.10    2.80
  23   6   3   -2.40    3.30
  24  -7  -3   -2.20    3.00
 -24  -7   3   -1.20    2.90
  24   7  -3    3.30    3.20
 -23  -7   3   35.40    5.30
  23   7  -3   40.00    6.00
 -22  -7   3    0.50    2.60
  22  -7  -3    4.10    3.10
  22   7  -3    1.80    3.20
 -21  -7   3    4.60    2.80
  21  -7  -3   11.50    3.00
  21   7  -3   12.20    3.40
  20  -7  -3    3.70    2.70
 -20  -7   3    3.90    2.80
  20   7  -3    7.00    3.20
  19  -7  -3   11.70    3.00
 -19  -7   3    6.50    2.80
 -19   7   3   11.10    2.40
  19   7  -3   12.10    3.10
 -18  -7   3   15.60    2.90
  18  -7  -3   12.00    2.60
  18   7  -3   12.50    2.80
 -18   7   3   22.80    2.80
  17  -7  -3   15.40    3.00
 -17  -7   3    8.60    2.60
 -17   7   3   15.40    2.50
  17   7  -3   14.40    3.00
 -16  -7   3    0.40    2.20
  16  -7  -3    1.30    2.30
 -16   7   3   -0.60    1.90
  16   7  -3   -0.90    2.10
  15  -7  -3   12.70    2.50
 -15  -7   3   14.50    2.50
 -15   7   3   16.70    2.60
  15   7  -3   14.50    2.60
  14  -7  -3    6.70    2.20
 -14  -7   3    3.10    2.50
 -14   7   3    5.60    1.70
  14   7  -3    6.50    2.30
  13  -7  -3    4.60    2.20
 -13  -7   3    6.70    2.10
 -13   7   3    2.70    1.60
  13   7  -3    5.70    2.10
 -12  -7   3   15.30    2.80
  12  -7  -3   15.20    4.00
  12   7  -3   20.70    2.40
 -12   7   3   20.50    2.50
  12   7  -3   17.40    2.80
  11  -7  -3   32.50    3.40
 -11  -7   3   34.30    3.30
 -11   7   3   33.10    3.00
  11   7  -3   37.70    2.50
  11   7  -3   38.30    3.60
  10  -7  -3    1.00    1.80
 -10  -7   3   -0.60    1.50
  10   7  -3    0.30    1.10
  10   7  -3   -0.80    1.70
 -10   7   3    0.00    1.40
  -9  -7   3   49.60    3.70
   9  -7  -3   57.59    4.10
   9   7  -3   52.79    4.20
  -9   7   3   53.19    3.50
   9   7  -3   58.79    3.30
   8  -7  -3   21.10    2.80
  -8  -7   3   13.30    2.30
   8   7  -3   17.00    2.70
   8   7  -3   15.50    2.00
  -8   7   3   15.10    2.20
  -7  -7   3   50.59    3.30
   7  -7  -3   54.59    3.90
   7   7  -3   49.10    3.30
  -7   7   3   53.79    3.30
   7   7  -3   55.29    4.00
   6  -7  -3   55.09    3.70
  -6  -7   3   50.69    3.20
  -6   7   3   43.40    3.20
   6   7  -3   48.60    3.70
   6   7  -3   51.69    3.20
  -5  -7   3  254.07   11.60
   5  -7  -3  243.28   12.10
  -5   7   3  228.18   11.70
   5   7  -3  250.97   11.80
   5   7  -3  263.67   12.30
   4  -7  -3    8.40    1.80
  -4  -7   3    5.80    1.10
   4   7  -3   10.90    2.10
   4   7  -3    8.60    1.50
  -4   7   3    9.00    1.50
   3  -7  -3   16.10    2.20
   3   7  -3   11.90    2.10
  -3   7   3   10.90    1.70
   3   7  -3   13.20    2.00
  -2  -7   3  181.28    8.10
   2  -7  -3  171.78    8.80
   2   7  -3  184.28    8.90
   2   7  -3  171.78    8.50
  -2   7   3  162.48    8.40
   1  -7  -3  329.67   15.50
  -1   7   3  322.17   15.20
  -1   7   3  330.37   15.10
   1   7  -3  320.57   15.20
   0  -7   3   -0.20    1.50
   0   7   3    1.00    1.10
   0   7   3    0.40    1.00
   0   7  -3    2.60    1.30
   1  -7   3  100.59    5.80
   1   7   3  105.99    5.80
   1   7   3   98.89    5.40
  -1   7  -3  104.49    5.50
   1   7   3  106.39    5.40
   2  -7   3   42.00    3.20
   2   7   3   42.00    3.40
   2   7   3   40.80    2.90
  -2   7  -3   38.70    2.90
   2   7   3   42.80    2.80
   3  -7   3  191.98    9.50
   3   7   3  186.88    9.50
   3   7   3  192.48    9.40
  -3   7  -3  179.98    9.20
   3   7   3  193.88    9.10
   4  -7   3   32.90    3.10
   4   7   3   33.20    3.10
  -4   7  -3   30.60    2.70
   4   7   3   32.10    2.40
   4   7   3   35.40    2.90
   5  -7   3  270.37   12.80
   5   7   3  266.77   12.80
   5   7   3  246.48   12.30
   5   7   3  256.77   12.70
  -5   7  -3  268.57   12.50
   6  -7   3   72.39    4.50
   6   7   3   68.79    4.60
  -6   7  -3   71.29    4.30
   6   7   3   67.39    3.90
   6   7   3   71.59    4.60
   7  -7   3  283.47   13.30
  -7   7  -3  275.57   13.20
   7   7   3  267.97   12.90
   7   7   3  274.17   13.40
   8  -7   3   40.90    3.40
  -8   7  -3   34.30    3.00
   8   7   3   38.90    3.60
   8   7   3   39.50    2.70
   9  -7   3    0.90    1.70
  -9   7  -3   -0.50    1.40
   9   7   3    0.00    1.20
   9   7   3    0.00    1.80
  10  -7   3   -0.80    1.70
  10   7   3    1.70    1.20
 -10   7  -3   -1.90    1.40
  10   7   3   -0.90    1.80
 -11  -7  -3    9.30    2.60
  11  -7   3    8.50    2.10
 -11   7  -3    8.20    2.00
  11   7   3   12.70    2.10
  11   7   3   10.50    2.50
 -12  -7  -3   18.90    3.40
  12  -7   3   20.80    3.20
 -12   7  -3   22.30    2.90
  12   7   3   25.00    3.50
  13  -7   3   -1.20    1.90
 -13  -7  -3   -1.80    2.40
  13   7   3    3.20    2.10
 -13   7  -3    1.90    2.70
  14  -7   3   -0.10    2.20
 -14  -7  -3   -0.20    2.50
 -14   7  -3    2.90    1.90
  14   7   3    0.60    2.00
  15  -7   3    0.70    2.20
 -15  -7  -3   -1.60    2.70
  15   7   3    0.80    2.20
 -15   7  -3   -1.70    2.00
  16  -7   3    9.80    2.50
 -16  -7  -3    5.70    2.70
  16   7   3    9.80    2.80
 -16   7  -3   11.70    2.30
  17  -7   3   28.70    3.90
 -17  -7  -3   28.20    4.20
 -17   7  -3   29.70    3.80
  17   7   3   25.10    4.30
  18  -7   3   17.70    2.90
 -18  -7  -3   12.30    3.20
  18   7   3   17.40    3.20
 -18   7  -3   25.10    3.70
 -19  -7  -3   16.00    3.50
  19  -7   3   20.40    3.40
  19   7   3   19.30    3.40
  20  -7   3    6.60    2.70
 -20  -7  -3    6.80    2.90
  20   7   3   15.10    3.30
  21  -7   3   32.10    4.70
 -21  -7  -3   23.60    3.80
  21   7   3   32.50    5.20
  22  -7   3    7.80    3.10
 -22  -7  -3    3.80    3.40
  22   7   3   12.80    5.50
 -23  -8   3   -3.20    2.80
  23  -8  -3    0.40    3.10
  23   8  -3    4.00    3.60
 -22  -8   3   12.10    3.60
  22  -8  -3   12.60    5.20
  21  -8  -3   -4.00    2.70
 -21  -8   3    0.20    2.90
  21   8  -3    5.00    3.60
 -20  -8   3    4.60    3.00
  20  -8  -3    2.60    3.00
  20   8  -3    6.70    3.50
  19  -8  -3    4.10    2.80
 -19  -8   3    1.60    2.90
 -19   8   3    8.60    2.50
  19   8  -3    7.20    3.10
  18  -8  -3   16.60    2.90
 -18  -8   3   13.00    3.10
  18   8  -3   16.40    3.20
 -18   8   3   27.90    3.60
 -17  -8   3    4.50    2.50
  17  -8  -3    8.90    2.70
  17   8  -3    6.70    3.00
 -17   8   3    7.80    2.30
  16  -8  -3   48.50    4.40
 -16  -8   3   35.50    4.10
 -16   8   3   41.00    3.90
  16   8  -3   42.50    4.50
  15  -8  -3    0.80    2.30
 -15  -8   3    3.50    2.40
 -15   8   3    2.30    1.80
  15   8  -3    4.30    2.60
  14  -8  -3   85.79    5.60
 -14  -8   3   71.69    5.50
 -14   8   3   85.49    5.00
  14   8  -3   80.79    5.70
  13  -8  -3   -0.30    2.10
 -13  -8   3   -1.60    2.20
 -13   8   3   -0.10    1.70
  13   8  -3    0.90    2.30
  12  -8  -3  192.38   10.00
 -12  -8   3  191.58    9.90
  12   8  -3  188.28   10.10
 -12   8   3  199.18    9.70
 -11  -8   3   -1.40    1.70
  11  -8  -3    1.30    1.80
  11   8  -3    0.20    2.00
  11   8  -3    0.60    1.30
  10  -8  -3   66.29    5.00
 -10  -8   3   66.19    4.60
 -10   8   3   73.19    4.40
  10   8  -3   69.39    4.20
  10   8  -3   73.59    5.10
   9  -8  -3   -0.40    1.70
  -9  -8   3    1.10    1.80
   9   8  -3    1.90    1.40
  -9   8   3    1.30    1.40
   9   8  -3    2.70    1.90
  -8  -8   3   28.70    2.90
   8  -8  -3   33.60    3.40
   8   8  -3   34.60    3.70
   8   8  -3   34.60    2.60
  -8   8   3   25.90    2.80
   7  -8  -3    4.00    1.80
  -7  -8   3    2.30    1.40
  -7   8   3    2.30    1.50
   7   8  -3    3.20    1.40
   7   8  -3    4.00    1.90
   6  -8  -3   17.30    2.40
   6   8  -3   18.30    2.30
  -6   8   3   17.50    2.10
   6   8  -3   20.50    3.10
   5  -8  -3   69.99    4.60
  -5  -8   3   64.89    3.90
   5   8  -3   78.49    4.30
   5   8  -3   67.59    4.60
  -5   8   3   68.09    4.20
   4  -8  -3   27.50    3.10
  -4  -8   3   19.20    1.90
   4   8  -3   26.70    2.50
  -4   8   3   22.00    2.30
   4   8  -3   28.00    3.30
  -3  -8   3   64.79    3.40
   3  -8  -3   68.79    4.50
   3   8  -3   67.39    4.00
   3   8  -3   67.49    4.50
  -3   8   3   65.69    4.00
   2  -8  -3  246.88   11.90
   2   8  -3  246.58   11.60
  -2   8   3  229.38   11.50
   1  -8  -3  112.29    6.30
  -1  -8   3  110.79    6.40
  -1   8   3  101.49    5.70
   1   8  -3  117.49    5.90
   0  -8   3  121.39    6.90
   0  -8  -3  125.49    6.90
   0   8   3  123.09    6.40
   0   8  -3  125.79    6.40
   1  -8   3   34.70    3.40
  -1   8  -3   35.70    3.00
   1   8   3   40.50    2.90
   2  -8   3   29.40    3.00
  -2   8  -3   25.90    2.50
   2   8   3   27.20    2.50
   2   8   3   26.80    3.20
   3  -8   3    5.50    1.80
   3   8   3   10.50    2.20
  -3   8  -3    8.80    1.70
   3   8   3    8.50    1.60
   4  -8   3   51.39    3.90
   4   8   3   52.29    4.00
  -4   8  -3   48.20    3.60
   4   8   3   50.19    3.30
   5  -8   3    0.10    1.60
  -5   8  -3   -0.10    1.40
   5   8   3    0.70    1.20
   5   8   3    3.50    2.00
   6  -8   3    3.80    1.70
   6   8   3    5.50    2.10
  -6   8  -3    5.50    1.60
   6   8   3    6.20    1.40
   7  -8   3   89.69    5.30
   7   8   3   81.09    4.60
   7   8   3   78.79    5.40
  -7   8  -3   84.79    5.00
   8  -8   3   27.80    4.30
   8   8   3   33.00    3.70
  -8   8  -3   34.60    3.10
   8   8   3   32.70    2.70
  -9  -8  -3    1.50    2.10
   9  -8   3    0.00    1.80
   9   8   3    3.40    1.50
   9   8   3    1.10    3.00
 -10  -8  -3  192.38   10.30
  10  -8   3  200.88   10.00
  10   8   3  197.68    9.50
  10   8   3  183.68   10.10
 -10   8  -3  189.38    9.70
 -11  -8  -3    2.80    2.40
  11  -8   3   -0.40    1.70
  11   8   3    1.00    2.20
 -11   8  -3    3.50    1.80
  11   8   3    0.00    1.60
 -12  -8  -3   20.40    4.10
  12  -8   3   19.90    3.30
 -12   8  -3   22.10    2.60
  12   8   3   17.20    2.80
  13  -8   3    1.30    2.30
 -13  -8  -3    0.20    2.50
 -13   8  -3    0.30    1.70
  13   8   3    2.60    2.40
 -14  -8  -3   27.00    4.30
  14  -8   3   32.40    3.90
  14   8   3   26.10    4.20
 -14   8  -3   29.00    3.50
 -15  -8  -3    3.10    2.60
  15  -8   3   -0.10    2.40
  15   8   3    0.10    2.40
 -15   8  -3   -1.40    1.90
 -16  -8  -3   31.50    4.80
  16  -8   3   36.40    4.30
  16   8   3   42.90    4.70
 -16   8  -3   32.90    3.80
  17  -8   3   -0.40    2.20
 -17  -8  -3    0.50    2.90
  17   8   3    4.10    3.00
 -17   8  -3    0.80    2.30
  18  -8   3    8.00    2.70
 -18  -8  -3    4.30    3.00
 -18   8  -3    9.40    2.60
  18   8   3   12.00    3.40
 -19  -8  -3    6.60    3.20
  19  -8   3    9.90    3.30
  19   8   3    8.00    3.30
 -20  -8  -3   33.50    5.20
  20  -8   3   40.20    4.80
  20   8   3   41.50    5.60
 -21  -8  -3    3.40    3.40
  21  -8   3    7.50    3.30
  21   8   3    5.30    5.90
 -22  -9   3   -4.30    3.10
  22  -9  -3    0.90    3.00
  22   9  -3    4.40    3.90
  21  -9  -3    3.70    3.30
 -21  -9   3   -2.20    3.00
  21   9  -3   -1.40    3.80
 -20  -9   3   -4.80    2.80
  20  -9  -3    0.90    3.10
 -20   9   3   12.00    4.00
  20   9  -3   -0.50    3.60
 -19  -9   3   -4.40    2.80
  19  -9  -3   -1.70    2.70
  19   9  -3    3.90    3.30
 -19   9   3   -0.20    2.30
  18  -9  -3   12.70    3.20
 -18  -9   3    4.30    2.70
 -18   9   3    6.10    2.40
  18   9  -3    6.20    3.20
 -17  -9   3    2.00    2.80
  17  -9  -3    5.10    2.70
 -17   9   3    6.30    2.30
  17   9  -3    3.80    2.80
  16  -9  -3   -1.90    2.40
 -16  -9   3   -1.90    2.40
  16   9  -3    3.40    2.90
 -16   9   3   -0.20    2.20
 -15  -9   3    1.30    2.40
  15  -9  -3    1.40    2.30
 -15   9   3    2.50    2.00
  15   9  -3    1.90    2.80
  14  -9  -3    0.10    2.30
 -14  -9   3    0.30    2.30
 -14   9   3    3.20    1.80
  14   9  -3    3.30    2.70
  13  -9  -3    9.10    2.40
 -13  -9   3    3.70    2.40
 -13   9   3   10.40    2.00
  13   9  -3    8.30    2.60
 -12  -9   3   -1.30    2.00
  12  -9  -3    1.50    2.00
  12   9  -3    1.40    2.30
 -12   9   3    1.30    1.60
 -11  -9   3   29.20    3.50
  11  -9  -3   26.10    3.60
 -11   9   3   27.50    2.90
  11   9  -3   31.50    3.80
  11   9  -3   37.60    3.10
  10  -9  -3   -0.50    2.00
 -10  -9   3   -2.90    1.70
  10   9  -3   -1.20    2.10
  10   9  -3   -2.60    1.70
 -10   9   3    1.30    1.60
  -9  -9   3   53.19    4.30
   9  -9  -3   65.19    4.60
   9   9  -3   64.09    4.10
  -9   9   3   59.39    4.00
   9   9  -3   60.59    4.80
  -8  -9   3   79.89    5.30
   8  -9  -3   93.69    5.80
   8   9  -3   95.59    6.10
   8   9  -3  101.39    5.30
  -8   9   3   96.09    5.30
  -7  -9   3   -0.10    1.60
   7  -9  -3    5.50    2.10
  -7   9   3    3.70    1.60
   7   9  -3    7.40    2.40
   7   9  -3    4.90    1.50
   6  -9  -3   33.40    3.90
   6   9  -3   40.90    3.10
   6   9  -3   35.00    4.20
  -6   9   3   35.70    3.00
   5  -9  -3   65.29    4.60
   5   9  -3   71.69    4.30
   5   9  -3   59.79    5.80
   4  -9  -3    2.10    1.90
   4   9  -3    1.80    2.00
  -4   9   3    1.00    1.40
   4   9  -3    1.60    1.50
   3  -9  -3   58.49    4.30
   3   9  -3   56.89    3.80
  -3   9   3   49.20    3.50
   2  -9  -3   92.69    5.70
   2   9  -3   85.09    5.00
  -2   9   3   89.49    5.00
   1  -9  -3   91.49    5.70
  -1  -9   3   90.99    5.90
  -1   9   3   97.59    5.20
   1   9  -3   91.89    5.20
   0  -9  -3   -1.40    1.90
   0  -9   3    0.00    1.80
   0   9  -3    0.10    1.50
   0   9   3   -0.50    1.30
  -1  -9  -3   42.80    4.00
   1  -9   3   41.00    3.90
   1   9   3   39.30    3.00
  -1   9  -3   43.90    3.30
   2  -9   3   19.00    2.70
   2   9   3   19.90    2.50
  -2   9  -3   16.20    2.50
  -3  -9  -3   32.00    3.20
   3  -9   3   21.20    3.00
   3   9   3   23.30    2.60
  -3   9  -3   20.70    2.50
   3   9   3   23.30    3.50
  -4  -9  -3  207.28   10.00
   4   9   3  195.38   10.30
   4   9   3  192.38    9.70
   5  -9   3   14.90    2.50
  -5  -9  -3   22.10    2.80
   5   9   3   15.30    2.30
  -5   9  -3    9.70    1.90
   5   9   3   13.60    2.50
  -6  -9  -3   90.49    5.70
   6  -9   3   84.79    5.50
  -6   9  -3   91.09    5.30
   6   9   3   90.79    5.10
   7  -9   3    2.10    2.10
  -7  -9  -3    3.40    2.00
   7   9   3    0.90    1.40
   7   9   3    2.00    2.10
  -7   9  -3    0.30    1.60
   8  -9   3   33.10    3.50
  -8  -9  -3   34.80    3.80
   8   9   3   28.80    3.90
  -8   9  -3   27.60    3.10
   8   9   3   24.00    2.90
   9  -9   3   83.49    5.50
  -9  -9  -3   90.19    5.90
   9   9   3   90.19    5.10
  -9   9  -3   80.49    5.10
   9   9   3   78.69    5.80
 -10  -9  -3   -0.10    2.50
  10  -9   3   -0.70    2.10
  10   9   3    0.20    1.70
  10   9   3    0.40    2.30
 -10   9  -3   -1.20    1.50
 -11  -9  -3    0.10    2.60
  11  -9   3   -1.50    1.90
  11   9   3    3.00    2.40
 -11   9  -3    2.70    1.70
 -12  -9  -3    7.90    2.70
  12  -9   3    6.60    2.20
  12   9   3    9.50    3.00
 -12   9  -3    6.50    2.10
 -13  -9  -3    0.40    2.50
  13  -9   3   -0.90    2.00
 -13   9  -3    2.00    2.00
  13   9   3    3.60    2.70
  14  -9   3    9.70    2.50
 -14  -9  -3   16.30    3.40
  14   9   3    9.00    2.90
 -14   9  -3   12.50    2.30
  15  -9   3   13.60    2.80
 -15  -9  -3   22.90    3.80
  15   9   3   18.70    3.50
 -15   9  -3   26.40    3.60
 -16  -9  -3    7.60    3.10
  16  -9   3    5.60    2.70
 -16   9  -3    5.40    2.40
  16   9   3    5.20    3.30
 -17  -9  -3   14.80    3.30
  17  -9   3   26.70    3.70
  17   9   3   18.50    3.60
 -17   9  -3   22.90    3.20
  18  -9   3   -1.20    2.70
 -18  -9  -3    1.50    3.00
  18   9   3   -2.70    3.30
 -18   9  -3    1.50    2.50
  19  -9   3    1.30    3.60
 -19  -9  -3   -1.00    3.10
  19   9   3   -0.30    3.50
 -19   9  -3   -5.90    2.60
  20  -9   3   -0.50    3.20
 -20  -9  -3   -3.20    4.00
  20   9   3    3.40    3.70
 -20 -10   3   -0.50    3.50
  20 -10  -3    5.10    3.40
  20  10  -3    0.30    3.70
 -20  10   3    9.70    3.00
  19 -10  -3    8.80    4.00
 -19 -10   3    2.20    3.40
 -19  10   3   13.90    3.00
  19  10  -3   10.10    4.20
 -18 -10   3   19.80    3.60
  18 -10  -3   33.40    4.70
  18  10  -3   25.20    4.10
 -18  10   3   38.40    4.20
 -17 -10   3   10.30    3.30
  17 -10  -3   17.30    3.30
  17  10  -3   16.50    3.70
 -17  10   3   24.90    3.70
 -16 -10   3   -0.20    2.80
  16 -10  -3    5.10    2.70
 -16  10   3    4.90    2.20
  16  10  -3    4.30    3.30
  15 -10  -3   -0.90    2.50
 -15  10   3   -0.90    2.20
  15  10  -3   -0.80    3.00
  14 -10  -3    0.70    2.50
  14  10  -3   -2.00    2.90
 -14  10   3    1.30    2.00
  13 -10  -3   34.20    4.20
  13  10  -3   33.40    4.70
 -13  10   3   42.50    3.80
  12 -10  -3   21.10    3.10
 -12  10   3   21.00    3.10
  12  10  -3   13.70    3.10
  11 -10  -3   10.20    2.70
 -11 -10   3    6.40    2.60
  11  10  -3    9.50    2.80
 -11  10   3   14.90    2.20
  11  10  -3   16.90    2.50
  10 -10  -3   84.89    5.60
 -10  10   3   74.29    4.90
  10  10  -3   80.09    6.00
   9 -10  -3   34.80    3.80
  -9  10   3   31.90    3.20
   9  10  -3   33.00    4.40
   9  10  -3   35.00    3.60
   8 -10  -3   60.69    4.70
   8  10  -3   56.59    4.40
   8  10  -3   64.89    5.10
  -8  10   3   56.89    4.10
   7 -10  -3   87.19    5.70
   7  10  -3   83.09    5.80
   7  10  -3  100.19    5.40
  -7  10   3   85.59    5.10
   6 -10  -3    5.80    2.10
  -6  10   3    4.10    1.60
   6  10  -3    4.50    1.80
   6  10  -3    0.60    2.50
   5 -10  -3    1.80    2.10
  -5  10   3    4.70    1.60
   5  10  -3    2.00    2.20
   4 -10  -3   16.50    2.80
  -4  10   3   19.00    2.70
   3 -10  -3    4.60    2.10
  -3  10   3    6.00    1.70
   3  10  -3   10.70    2.00
  -2 -10   3    8.70    2.30
   2 -10  -3   17.30    2.80
  -2  10   3   15.50    2.10
   2  10  -3   14.10    2.20
   1 -10  -3    8.90    2.50
  -1 -10   3    6.80    2.20
  -1  10   3    9.00    1.80
   1  10  -3    9.40    2.10
   0 -10  -3   12.80    2.50
   0 -10   3   16.10    2.70
   0  10   3   18.00    2.60
   0  10  -3   19.10    2.80
  -1 -10  -3    0.30    2.00
   1 -10   3    2.00    2.30
  -1  10  -3   -1.30    1.40
   1  10   3    1.50    1.60
  -2 -10  -3   33.10    4.10
   2 -10   3   31.50    3.70
   2  10   3   32.90    3.00
  -2  10  -3   33.10    3.20
   3 -10   3    0.20    1.90
   3  10   3    1.00    1.60
  -3  10  -3    1.00    1.60
   4 -10   3  111.39    6.60
  -4  10  -3  107.09    6.10
   4  10   3  114.09    6.80
   4  10   3  105.49    6.30
   5 -10   3   -0.20    1.90
   5  10   3    3.70    2.50
  -5  10  -3    3.50    1.70
   6 -10   3    0.80    2.00
   6  10   3   -1.30    2.00
  -6  10  -3   -0.70    1.70
   7 -10   3    5.10    2.40
   7  10   3    1.40    2.40
   7  10   3    4.50    2.00
  -7  10  -3    4.30    1.80
   8 -10   3  105.99    6.50
  -8 -10  -3  119.79    8.40
   8  10   3  109.29    6.90
  -8  10  -3  101.39    6.10
   8  10   3  100.59    6.10
  -9 -10  -3   48.10    4.60
   9 -10   3   34.80    3.90
   9  10   3   46.50    3.80
  -9  10  -3   38.10    3.50
   9  10   3   37.20    4.70
  10 -10   3   35.00    4.00
 -10 -10  -3   41.20    4.70
  10  10   3   38.30    3.90
  10  10   3   36.20    4.80
 -10  10  -3   37.10    3.70
  11 -10   3   63.49    5.00
 -11 -10  -3   67.89    5.60
 -11  10  -3   65.09    4.70
  11  10   3   66.79    5.70
  12 -10   3    0.90    2.30
 -12 -10  -3    0.30    2.90
 -12  10  -3    1.10    1.90
  12  10   3    3.70    2.90
  13 -10   3    6.60    2.40
 -13 -10  -3    6.80    3.00
  13  10   3    8.20    3.30
 -13  10  -3    5.30    2.00
 -14 -10  -3    3.50    3.00
  14 -10   3    4.70    2.50
  14  10   3    5.50    3.20
 -14  10  -3    6.30    2.40
  15 -10   3   -0.50    2.50
 -15 -10  -3    2.10    3.00
  15  10   3    0.60    3.30
 -15  10  -3    2.00    2.20
 -16 -10  -3    2.00    3.10
  16 -10   3   11.20    3.00
  16  10   3   12.30    3.70
 -16  10  -3   12.20    2.80
  17 -10   3   44.20    5.00
  17  10   3   37.70    5.80
 -17  10  -3   37.90    4.60
  18 -10   3   11.90    3.20
 -18 -10  -3    7.70    3.60
  18  10   3   14.70    4.80
 -18  10  -3   13.70    3.10
 -19 -10  -3    1.70    3.80
  19 -10   3    6.70    3.10
  19  10   3    5.50    4.00
 -19  10  -3   13.80    3.40
  19  11  -3    4.20    3.80
  18 -11  -3   -1.70    3.20
  18  11  -3   -0.20    3.30
 -18  11   3    2.40    2.60
  17 -11  -3   -0.30    2.80
 -17  11   3    3.00    2.40
  17  11  -3    0.10    3.70
  16 -11  -3    0.50    3.00
 -16 -11   3   -6.80    3.40
  16  11  -3    1.30    3.40
 -16  11   3    3.80    2.40
  15 -11  -3   21.70    3.50
 -15 -11   3   -1.40    3.40
  15  11  -3    9.50    3.50
 -15  11   3   22.70    3.60
  14 -11  -3    1.50    2.40
  14  11  -3    1.40    3.40
 -14  11   3   -0.30    2.10
  13 -11  -3    2.60    2.50
  13  11  -3   -0.30    3.10
 -13  11   3    2.30    2.10
  12 -11  -3    0.00    2.30
  12  11  -3    1.20    2.90
 -12  11   3   -1.50    2.00
  11 -11  -3    6.80    2.60
  11  11  -3   14.50    2.80
  11  11  -3    9.10    3.30
 -11  11   3    7.90    2.20
  10 -11  -3   14.30    2.90
  10  11  -3   10.90    3.00
 -10  11   3   12.60    2.10
  10  11  -3   23.30    3.80
   9 -11  -3   -1.30    2.20
   9  11  -3    1.00    2.50
   9  11  -3    0.00    2.20
  -9  11   3    1.80    1.80
   8 -11  -3    2.60    2.40
   8  11  -3    1.40    2.60
   8  11  -3    5.50    2.20
  -8  11   3    2.50    1.80
   7 -11  -3   -0.10    2.20
  -7  11   3   -0.10    1.60
   7  11  -3   -1.70    2.40
   7  11  -3    1.90    2.00
   6 -11  -3   25.80    3.80
  -6  11   3   24.00    2.90
   6  11  -3   30.10    4.30
   6  11  -3   30.80    3.40
   5 -11  -3    3.00    2.20
  -5  11   3    2.70    1.70
   5  11  -3    4.80    2.00
   4 -11  -3    7.50    2.40
  -4 -11   3    8.00    2.70
  -4  11   3    8.80    1.90
   4  11  -3    4.30    1.80
   3 -11  -3    5.20    2.30
  -3 -11   3    2.50    2.30
   3  11  -3    9.80    2.10
  -3  11   3    4.60    1.70
   2 -11  -3  169.48    9.30
  -2 -11   3  165.68    9.30
   2  11  -3  162.08    8.70
  -2  11   3  174.38    8.60
   1 -11  -3   36.10    4.30
  -1 -11   3   33.50    4.10
   1  11  -3   33.00    3.30
  -1  11   3   34.40    3.30
   0 -11  -3  283.57   14.70
   0 -11   3  295.77   14.70
   0  11  -3  289.87   14.20
   0  11   3  306.07   14.20
   1 -11   3    5.80    2.50
  -1 -11  -3    0.90    2.30
   1  11   3    8.80    2.00
  -1  11  -3    3.30    1.80
  -2 -11  -3   36.50    4.50
   2 -11   3   37.20    4.20
   2  11   3   42.60    3.50
  -2  11  -3   37.80    3.50
  -3 -11  -3    6.40    2.70
   3 -11   3   10.90    2.50
  -3  11  -3   14.10    2.30
   3  11   3   12.10    2.10
   4 -11   3   25.40    3.90
   4  11   3   31.00    3.20
  -4  11  -3   34.40    3.40
   5 -11   3    6.10    2.30
  -5  11  -3    6.00    2.10
   5  11   3    7.30    2.00
   6 -11   3    5.80    2.10
   6  11   3    6.30    1.90
  -6  11  -3    9.50    2.20
   6  11   3    5.70    2.70
   7 -11   3    1.90    2.10
   7  11   3    4.20    2.70
  -7  11  -3    3.60    1.80
   7  11   3    7.80    2.10
   8 -11   3   11.70    2.50
  -8  11  -3   19.40    3.10
   8  11   3   14.40    2.50
   8  11   3   13.90    3.00
   9 -11   3    5.50    2.30
  -9  11  -3    6.80    2.00
   9  11   3    4.30    2.80
   9  11   3    7.00    2.50
  10 -11   3   -0.10    2.20
  10  11   3    2.10    3.00
  10  11   3    3.70    2.50
 -10  11  -3   -0.20    2.00
  11 -11   3    1.10    2.20
 -11  11  -3    2.60    2.20
  11  11   3   -5.40    2.80
  12 -11   3    2.80    2.50
 -12 -11  -3   -2.30    3.00
  12  11   3   -3.50    3.20
 -12  11  -3    3.00    2.30
  13 -11   3    5.30    2.60
 -13 -11  -3    0.70    3.10
  13  11   3    7.80    3.60
 -13  11  -3    7.80    2.50
 -14 -11  -3   -2.60    3.20
  14 -11   3   -0.20    2.90
  14  11   3    0.10    3.50
 -14  11  -3   -1.50    2.20
 -15 -11  -3   -6.70    3.20
  15 -11   3    2.20    3.00
 -15  11  -3    2.70    2.40
  15  11   3    3.30    3.60
 -16 -11  -3    0.40    3.90
  16 -11   3   12.70    4.10
 -16  11  -3    8.50    2.70
  16  11   3   14.10    4.00
 -17 -11  -3   -1.60    3.80
  17 -11   3    5.70    3.00
 -17  11  -3    3.10    3.00
  17  11   3    1.80    3.60
  16 -12  -3    1.60    3.10
  16  12  -3    1.90    3.40
  15 -12  -3   40.70    6.30
  15  12  -3   10.20    4.60
 -15  12   3   17.30    2.90
  14 -12  -3    1.20    2.60
 -14  12   3    2.20    2.10
  14  12  -3   -1.40    3.10
  13 -12  -3    1.60    2.60
  13  12  -3   -1.00    3.00
 -13  12   3    1.70    2.10
  12 -12  -3    5.30    2.80
 -12  12   3    6.80    2.40
  12  12  -3    0.90    3.40
  11 -12  -3    7.20    2.90
 -11  12   3    7.00    2.50
  11  12  -3    6.10    3.20
  10 -12  -3    1.80    2.50
  10  12  -3    6.10    2.80
 -10  12   3    5.20    2.20
  10  12  -3    6.70    3.50
   9 -12  -3    5.40    2.50
   9  12  -3    2.20    2.90
   9  12  -3    6.40    2.70
  -9  12   3    5.40    2.10
   8 -12  -3   -1.10    2.40
   8  12  -3    2.40    2.80
   8  12  -3    0.10    2.50
  -8  12   3    3.10    2.00
   7 -12  -3   14.40    2.90
   7  12  -3   10.50    2.60
  -7  12   3   16.10    2.50
   6 -12  -3   11.10    2.90
  -6  12   3   11.80    2.30
   6  12  -3    9.10    2.40
  -5 -12   3    3.10    2.70
   5 -12  -3    2.20    2.70
  -5  12   3    6.40    2.00
   5  12  -3    7.80    2.50
  -4 -12   3   14.70    3.10
   4 -12  -3   19.30    3.30
   4  12  -3   23.70    3.40
  -4  12   3   24.20    3.20
  -3 -12   3   -0.20    2.50
   3 -12  -3    0.10    2.40
   3  12  -3    1.80    2.00
  -3  12   3    4.20    1.90
   2 -12  -3    3.60    2.50
  -2 -12   3    1.90    2.50
   2  12  -3    6.10    2.10
  -2  12   3    7.80    2.00
  -1 -12   3    8.30    2.80
   1 -12  -3    1.20    2.40
  -1  12   3    8.10    2.10
   1  12  -3    8.30    2.10
   0 -12  -3    3.20    3.00
   0 -12   3   -0.90    2.20
   0  12   3    3.10    1.90
   0  12  -3    1.80    1.80
  -1 -12  -3    9.40    3.00
   1 -12   3    9.90    2.60
   1  12   3   16.30    2.50
  -1  12  -3   15.80    2.50
   2 -12   3    5.60    2.60
  -2 -12  -3    5.90    2.80
   2  12   3    6.90    2.20
  -2  12  -3    6.80    2.00
  -3 -12  -3   -1.80    2.60
   3 -12   3   -2.20    2.40
   3  12   3    0.20    1.90
  -3  12  -3    2.50    2.00
   4 -12   3   24.30    4.10
  -4 -12  -3   28.30    4.40
   4  12   3   31.80    3.60
  -4  12  -3   30.70    3.50
   5 -12   3   40.90    4.50
   5  12   3   40.40    3.90
  -5  12  -3   39.50    3.90
   6 -12   3    3.00    2.30
  -6  12  -3    6.70    2.20
   6  12   3    6.90    2.30
   7 -12   3    5.60    2.40
  -7  12  -3    3.70    2.00
   7  12   3    3.60    2.40
   8 -12   3    2.80    2.40
  -8  12  -3    2.50    2.20
   8  12   3    5.70    2.50
   8  12   3    3.60    3.10
   9 -12   3   59.19    5.00
   9  12   3   56.69    5.30
  -9  12  -3   53.19    4.50
   9  12   3   53.79    5.70
  10 -12   3    0.60    2.60
 -10  12  -3    1.00    2.20
  10  12   3    1.70    3.20
  11 -12   3   39.30    4.60
  11  12   3   44.10    5.40
 -11  12  -3   40.70    4.30
  12 -12   3   -0.40    2.40
 -12  12  -3   -0.10    2.30
  12  12   3   -3.10    3.30
  13 -12   3    0.40    2.50
 -13  12  -3    3.40    2.40
  13  12   3    5.20    3.40
  14 -12   3   11.10    3.50
 -14  12  -3   13.90    3.10
  14  12   3    8.70    4.60
  15 -12   3    3.00    3.10
  15  12   3    2.70    3.60
 -15  12  -3    1.80    2.50
  14 -13  -3    8.50    3.20
 -14  13   3    8.60    2.60
  14  13  -3   16.20    4.00
  13 -13  -3   23.60    3.80
  13  13  -3   20.10    4.60
 -13  13   3   31.90    4.20
  12 -13  -3    2.90    4.00
 -12  13   3    1.00    2.70
  12  13  -3   -0.80    5.00
  11 -13  -3   10.80    3.00
 -11  13   3    7.40    2.40
  11  13  -3    8.90    3.40
  10 -13  -3   13.00    3.30
  10  13  -3   17.80    3.90
  10  13  -3   13.50    3.80
   9 -13  -3    1.60    2.50
   9  13  -3    6.80    3.10
  -9  13   3    0.70    2.00
   8 -13  -3    5.60    2.80
   8  13  -3    5.80    2.80
  -8  13   3    8.90    2.40
  -7 -13   3   -2.10    2.70
   7 -13  -3   -0.40    2.80
   7  13  -3   -1.20    2.50
  -7  13   3    3.40    2.20
   6 -13  -3    6.10    2.60
  -6 -13   3    2.80    2.70
  -6  13   3    7.90    2.30
   6  13  -3    2.80    2.60
  -5 -13   3   27.80    4.60
   5 -13  -3   29.30    4.50
  -5  13   3   31.20    3.60
   5  13  -3   33.10    4.00
  -4 -13   3    3.00    2.60
   4 -13  -3   12.00    3.10
  -4  13   3    6.70    2.10
   4  13  -3    5.60    2.30
  -3 -13   3   41.80    5.00
   3 -13  -3   45.40    5.00
   3  13  -3   46.60    4.40
  -3  13   3   53.09    4.20
  -2 -13   3    2.40    2.90
   2 -13  -3    0.80    2.70
  -2  13   3    2.10    1.90
   2  13  -3   -0.20    2.20
   1 -13  -3   36.90    4.90
  -1 -13   3   39.50    4.70
  -1  13   3   40.10    4.00
   1  13  -3   43.80    4.00
   0 -13   3    1.70    2.70
   0 -13  -3   -0.60    2.60
   0  13   3    3.00    2.20
   0  13  -3    0.40    1.90
  -1 -13  -3   -0.70    3.10
   1 -13   3   -0.10    2.40
  -1  13  -3    2.60    2.20
   1  13   3    1.40    2.20
  -2 -13  -3   -4.90    2.70
   2 -13   3    1.70    2.60
  -2  13  -3   -0.40    1.90
   2  13   3    1.30    2.10
   3 -13   3   37.60    4.70
  -3 -13  -3   37.60    5.00
  -3  13  -3   42.40    3.90
   3  13   3   43.60    4.20
  -4 -13  -3    9.30    3.00
   4 -13   3   10.30    2.80
  -4  13  -3   16.10    2.60
   4  13   3   15.10    2.80
   5 -13   3    1.30    2.50
  -5 -13  -3    1.40    2.90
   5  13   3    5.40    2.50
  -5  13  -3    0.50    2.10
  -6 -13  -3    1.20    2.80
   6 -13   3    4.20    2.90
  -6  13  -3    2.40    2.10
   6  13   3   -0.70    2.40
   7 -13   3   -1.40    2.50
   7  13   3   -1.00    2.50
  -7  13  -3   -1.70    2.00
   8 -13   3    8.30    2.60
   8  13   3    6.40    2.90
  -8  13  -3    6.50    2.50
   9 -13   3    7.90    2.90
  -9  13  -3    1.60    2.20
   9  13   3   -4.20    2.90
  10 -13   3    6.70    3.20
  10  13   3   13.20    3.90
 -10  13  -3   14.70    2.80
  11 -13   3    0.40    2.40
 -11  13  -3    6.30    4.20
  11  13   3    9.40    4.10
  12 -13   3   11.20    3.30
  12  13   3    9.00    3.90
 -12  13  -3    5.10    2.40
  10 -14  -3   -1.40    2.90
 -10  14   3    4.90    2.50
  -9 -14   3    6.20    3.20
   9 -14  -3    7.90    3.00
   9  14  -3    9.30    3.30
  -9  14   3   11.30    2.70
  -8 -14   3   21.30    3.90
   8  14  -3   31.70    4.00
  -8  14   3   32.80    4.50
   7 -14  -3   11.20    3.20
  -7 -14   3   23.70    5.00
   7  14  -3   19.90    3.40
  -7  14   3   15.60    4.30
  -6 -14   3   13.90    3.70
   6 -14  -3   17.50    3.60
  -6  14   3    9.90    2.40
   6  14  -3    5.80    2.80
   5 -14  -3    0.40    2.60
  -5 -14   3   -0.30    3.00
  -5  14   3    6.80    2.30
   5  14  -3    0.50    2.70
   4 -14  -3    0.80    3.20
  -4 -14   3   -0.30    3.00
   4  14  -3   -3.90    2.60
  -4  14   3    1.70    2.30
   3 -14  -3    3.80    2.80
  -3 -14   3    1.80    3.30
   3  14  -3    5.90    2.60
  -3  14   3    3.00    2.30
   2 -14  -3   -2.10    2.80
  -2 -14   3    0.70    3.00
   2  14  -3    3.50    2.30
  -2  14   3    9.00    2.60
  -1 -14   3    8.40    2.90
   1 -14  -3    9.50    3.30
   1  14  -3    6.00    2.40
  -1  14   3   10.60    2.50
   0 -14   3    3.10    2.80
   0 -14  -3    5.80    3.10
   0  14  -3    1.30    2.40
   0  14   3    4.00    2.40
   1 -14   3    4.20    3.10
  -1 -14  -3   -1.00    3.00
   1  14   3    2.40    2.30
  -1  14  -3    2.30    2.40
  -2 -14  -3   -5.70    3.00
   2 -14   3   -2.10    2.50
   2  14   3   -0.60    2.20
  -2  14  -3    2.90    2.40
   3 -14   3    5.80    3.10
  -3 -14  -3    3.20    3.40
   3  14   3    9.40    2.80
  -3  14  -3    4.60    2.30
  -4 -14  -3   -3.60    3.10
   4 -14   3    0.20    2.40
  -4  14  -3    0.30    2.20
   4  14   3    0.60    2.40
  -5 -14  -3    0.10    3.20
   5 -14   3    6.80    3.30
  -5  14  -3    8.80    2.70
   5  14   3    5.90    2.80
  -6 -14  -3   33.80    5.30
   6 -14   3   24.70    5.50
   6  14   3   46.90    4.80
  -6  14  -3   45.40    6.80
  -7 -14  -3    2.50    4.00
   7 -14   3    3.60    2.90
   7  14   3    4.90    3.00
  -7  14  -3   -2.00    2.20
  -8 -14  -3   19.90    3.80
   8 -14   3   15.80    3.00
   8  14   3   11.90    3.50
  -8  14  -3   23.80    3.30
   9 -14   3   13.20    3.30
  -9 -14  -3    5.10    3.30
  -9  14  -3    6.30    2.50
   4 -15  -3   -0.90    2.60
  -4 -15   3   -1.10    3.10
   4  15  -3    2.10    2.80
  -4  15   3    0.90    2.30
   3 -15  -3   -6.10    3.30
  -3 -15   3    1.30    3.10
  -3  15   3   -0.30    2.40
   3  15  -3    2.90    2.60
   2 -15  -3    2.70    3.20
  -2 -15   3   -1.90    3.00
   2  15  -3    0.90    2.80
  -2  15   3    0.50    2.20
  -1 -15   3   33.20    5.00
   1 -15  -3   37.70    5.30
  -1  15   3   43.10    4.50
   1  15  -3   28.60    4.70
   0 -15   3   13.70    3.10
   0 -15  -3   16.50    3.40
   0  15  -3   29.30    3.60
   0  15   3   27.20    4.20
   1 -15   3   11.20    3.10
  -1 -15  -3   32.70    5.10
  -1  15  -3   16.40    3.00
   1  15   3   30.20    4.30
  -2 -15  -3    2.70    3.10
   2 -15   3    7.20    3.20
   2  15   3    7.40    2.90
  -2  15  -3    6.50    2.70
  27   0  -4   -0.60    2.70
 -27   0   4   -0.90    2.50
 -26   0   4   49.30    5.00
  26   0  -4   54.79    5.00
  25   0  -4    2.70    2.50
 -25   0   4   -1.00    2.50
 -24   0   4   -0.60    2.30
  24   0  -4    1.50    2.30
 -23   0   4    0.30    2.30
  23   0  -4    1.60    2.10
 -22   0   4    9.90    2.60
  22   0  -4    4.30    2.10
 -21   0   4    0.40    1.90
  21   0  -4   -1.00    2.00
  20   0  -4   27.30    3.20
 -20   0   4   24.60    3.20
  19   0  -4   -0.10    1.70
 -19   0   4    2.40    1.80
  18   0  -4   43.40    3.50
 -18   0   4   36.10    3.40
  17   0  -4   -0.10    1.50
 -16   0   4    0.40    1.50
  16   0  -4   -1.30    1.30
 -15   0   4    1.90    1.40
  15   0  -4   -0.30    1.40
 -14   0   4   82.79    4.50
  14   0  -4   71.49    4.50
  13   0  -4   -0.10    1.20
 -13   0   4    1.70    1.10
 -12   0   4   34.60    2.60
  12   0  -4   36.10    2.70
  11   0  -4    0.50    1.00
 -11   0   4    0.50    1.00
  11   0  -4    0.20    0.40
  10   0  -4  783.32   35.10
 -10   0   4  758.02   35.00
  -9   0   4    1.30    0.80
   9   0  -4   -0.10    0.90
   8   0  -4   46.90    2.70
  -8   0   4   46.30    2.20
  -8   0   4   44.50    2.70
  -7   0   4    0.20    0.40
  -7   0   4    0.50    0.60
   7   0  -4   -0.10    0.80
   6   0  -4  558.94   25.60
  -6   0   4  555.64   25.40
  -6   0   4  578.94   25.60
  -5   0   4    2.00    0.40
  -5   0   4    0.90    0.70
   5   0  -4    1.00    0.70
  -4   0   4   65.59    3.30
   4   0  -4   67.39    3.30
   3   0  -4    1.00    0.50
   2   0  -4   62.89    3.10
   2   0  -4   61.89    3.00
  -2   0   4   68.09    3.20
   1   0  -4   -0.10    0.50
   1   0  -4    0.20    0.20
  -1   0   4   -1.00    0.50
   0   0   4  763.82   34.60
  -1   0  -4    1.10    0.60
   1   0   4    0.20    0.40
   1   0   4   -0.80    0.80
   2   0   4 3078.09  137.99
  -2   0  -4 3139.19  137.99
  -2   0  -4 3107.19  145.29
   2   0   4 2921.11  144.29
  -2   0  -4 2913.91  144.29
   3   0   4    0.40    1.00
  -3   0  -4    1.40    0.60
   3   0   4    0.60    0.50
   4   0   4  402.66   18.50
   4   0   4  408.46   18.80
  -4   0  -4  405.16   18.40
   5   0   4    0.70    1.00
   5   0   4    0.20    0.60
  -5   0  -4    1.70    0.60
   6   0   4  398.46   18.50
  -6   0  -4  393.56   17.90
   6   0   4  394.36   18.10
   7   0   4    0.40    1.10
  -7   0  -4    0.80    0.70
   7   0   4   -0.80    0.90
   8   0   4   18.10    1.80
  -8   0  -4   19.40    1.40
   8   0   4   19.50    2.40
   9   0   4    1.30    1.30
   9   0   4    0.30    1.00
  -9   0  -4    0.80    0.70
  10   0   4   28.90    2.90
 -10   0  -4   27.80    1.90
  10   0   4   29.90    2.40
  11   0   4   -0.90    1.20
  11   0   4    2.10    1.40
 -11   0  -4   -0.20    0.80
 -12   0  -4  619.54   28.00
  12   0   4  614.34   28.40
 -13   0  -4    1.90    0.90
  13   0   4    0.80    1.40
  14   0   4    9.80    1.70
  15   0   4   -2.20    1.50
 -15   0  -4   -1.30    2.00
 -16   0  -4    5.00    3.60
  16   0   4    5.90    2.00
  17   0   4    0.50    1.70
 -17   0  -4   -2.50    1.90
 -18   0  -4   91.19    6.20
  18   0   4  104.99    5.90
  19   0   4    0.90    1.90
 -19   0  -4   -2.90    2.10
 -20   0  -4   22.30    3.80
  20   0   4   33.60    3.60
  21   0   4    1.10    2.20
 -21   0  -4   -2.40    2.20
  22   0   4    9.60    2.50
 -22   0  -4    7.50    2.70
  23   0   4   -1.00    2.20
 -23   0  -4    0.60    2.60
 -24   0  -4   12.00    3.00
  24   0   4   20.60    3.30
  25   0   4   -3.10    2.50
 -25   0  -4   -2.30    2.60
 -27  -1   4   -3.00    2.80
  27  -1  -4    6.80    3.10
  27   1  -4   -2.60    2.60
 -27   1   4   -1.20    2.60
  26  -1  -4   12.50    2.90
 -26  -1   4   14.20    3.20
  26   1  -4   18.20    3.30
 -26   1   4   12.40    3.00
 -25  -1   4    2.70    2.50
  25  -1  -4    1.30    2.50
  25   1  -4    2.00    2.60
 -25   1   4   -0.80    2.60
  24  -1  -4   14.10    2.90
 -24  -1   4    9.90    2.80
 -24   1   4    8.90    2.80
  24   1  -4    7.80    2.50
  23  -1  -4    0.50    2.10
 -23  -1   4    3.00    2.50
  23   1  -4    3.70    2.30
 -23   1   4   -0.60    2.20
  22  -1  -4    0.90    2.00
 -22  -1   4    4.10    2.20
  22   1  -4    2.00    2.20
 -22   1   4   -0.90    2.00
 -21  -1   4   50.29    4.50
  21  -1  -4   57.29    4.30
  21   1  -4   57.29    4.40
 -21   1   4   49.80    4.20
 -20  -1   4   18.60    3.30
  20  -1  -4   20.40    3.00
 -20   1   4   21.50    3.20
  20   1  -4   18.20    3.00
 -19  -1   4   48.00    4.00
  19  -1  -4   42.80    3.80
 -19   1   4   43.90    3.70
  19   1  -4   46.70    3.70
  18  -1  -4   39.90    3.50
 -18  -1   4   45.10    3.70
  18   1  -4   39.10    3.50
 -17  -1   4   52.69    3.90
  17  -1  -4   48.20    3.80
  17   1  -4   49.70    3.80
 -17   1   4   58.49    3.80
  16  -1  -4   45.80    3.50
 -16  -1   4   45.90    3.50
  16   1  -4   46.30    3.50
 -16   1   4   49.30    3.50
  15  -1  -4  176.98    8.80
 -15  -1   4  175.38    8.70
  15   1  -4  173.08    8.80
 -15   1   4  175.38    8.70
  14  -1  -4   34.70    3.00
 -14  -1   4   40.90    3.10
 -14   1   4   37.50    2.00
  14   1  -4   35.40    2.80
 -14   1   4   40.20    2.90
  13  -1  -4  160.68    8.10
 -13  -1   4  161.68    8.10
 -13   1   4  159.68    7.50
 -13   1   4  165.58    8.00
  13   1  -4  161.38    8.10
  12  -1  -4    0.60    1.10
 -12  -1   4    0.10    1.10
  12   1  -4    0.60    1.10
 -12   1   4   -0.50    0.50
 -12   1   4    0.20    1.00
  11  -1  -4  101.69    5.30
 -11  -1   4  109.29    5.40
 -11   1   4  103.69    4.80
  11   1  -4   96.19    5.30
 -11   1   4  102.69    5.20
 -10  -1   4   11.70    1.80
  10  -1  -4    9.70    1.50
  10   1  -4   11.30    1.50
 -10   1   4   11.60    0.90
   9  -1  -4   81.29    4.40
  -9  -1   4   88.29    4.40
   9   1  -4   84.39    4.40
  -9   1   4   84.09    4.00
  -9   1   4   85.29    4.30
   8  -1  -4  404.86   17.70
  -8  -1   4  390.86   17.60
  -8   1   4  388.86   17.60
  -8   1   4  399.66   17.40
   8   1  -4  333.87   17.30
   8   1  -4  386.86   17.60
   7  -1  -4    3.50    0.80
  -7   1   4    3.70    0.50
   7   1  -4    2.10    0.90
  -7   1   4    2.50    0.70
   7   1  -4    2.30    0.40
  -6  -1   4  112.89    5.40
   6  -1  -4  113.19    5.40
   6   1  -4  102.49    5.10
  -6   1   4  110.79    5.20
   6   1  -4  111.39    5.40
  -6   1   4  115.69    5.30
  -5  -1   4  246.38   11.60
   5  -1  -4  252.37   11.60
   5   1  -4  258.87   11.60
  -5   1   4  254.77   11.50
  -5   1   4  264.77   11.60
   5   1  -4  240.58   11.50
  -4  -1   4   82.09    3.90
   4  -1  -4   80.39    3.90
   4   1  -4   74.89    3.80
  -4   1   4   74.69    3.90
   4   1  -4   86.89    3.90
  -4   1   4   82.09    3.80
   3  -1  -4   11.20    1.00
   3   1  -4    9.50    1.10
  -3   1   4   11.20    0.90
   3   1  -4   11.50    1.00
  -3   1   4    9.90    1.00
  -2  -1   4   33.30    1.90
   2  -1  -4   34.50    1.80
  -2   1   4   34.50    1.90
   2   1  -4   30.90    1.80
   2   1  -4   39.10    1.90
  -2   1   4   35.20    2.10
  -1  -1   4  108.79    5.00
   1  -1  -4  102.49    4.80
   1   1  -4  101.89    4.90
  -1   1   4  104.79    5.10
  -1   1   4  104.59    4.90
   1   1  -4  104.59    4.90
   0  -1   4   40.30    2.20
   0  -1   4   39.80    2.40
   0   1   4   42.80    2.10
   0   1  -4   42.70    2.20
   0   1   4   41.90    2.00
   0   1   4   41.60    2.70
   1  -1   4    3.60    0.70
   1  -1   4    1.10    0.90
   1   1   4    1.10    0.40
  -1   1  -4    1.90    0.70
   1   1   4    0.40    1.00
   1   1   4    1.30    0.60
   2  -1   4  347.17   15.70
   2  -1   4  339.37   15.50
  -2   1  -4  338.67   15.50
   2   1   4  342.87   15.90
   2   1   4  333.97   15.40
   3  -1   4  458.65   21.10
  -3  -1  -4  478.65   21.10
   3  -1   4  470.55   21.40
  -3   1  -4  472.65   21.10
   3   1   4  459.15   21.10
   3   1   4  452.45   21.50
  -4  -1  -4   47.50    2.40
   4  -1   4   47.50    2.50
   4  -1   4   41.80    2.80
   4   1   4   46.70    3.10
  -4   1  -4   44.90    2.40
   4   1   4   46.60    2.50
  -5  -1  -4    1.10    0.60
   5  -1   4    1.20    0.90
   5  -1   4    1.80    0.80
   5   1   4    0.40    0.60
  -5   1  -4    0.30    0.70
   5   1   4    0.70    1.10
   6  -1   4  630.54   28.10
   6  -1   4  577.74   27.90
  -6  -1  -4  619.64   27.60
  -6   1  -4  625.14   27.60
   6   1   4  581.54   28.10
   6   1   4  624.54   27.80
  -7  -1  -4  638.74   29.30
   7  -1   4  639.74   29.50
   7  -1   4  654.23   29.90
   7   1   4  647.84   29.50
   7   1   4  647.44   30.00
  -7   1  -4  662.73   29.40
  -8  -1  -4  138.19    6.50
   8  -1   4  139.29    7.20
   8   1   4  133.29    6.80
  -8   1  -4  146.59    6.70
   8   1   4  143.59    7.40
  -9  -1  -4   88.49    4.30
   9  -1   4   88.29    5.10
   9  -1   4   91.79    4.80
   9   1   4   88.99    4.70
  -9   1  -4   91.59    4.50
   9   1   4   88.49    5.30
  10  -1   4   49.80    3.30
  10  -1   4   56.29    3.80
 -10  -1  -4   54.79    2.90
  10   1   4   57.79    4.00
 -10   1  -4   58.49    3.10
  10   1   4   55.39    3.30
 -11  -1  -4  295.87   13.80
  11  -1   4  294.97   14.30
  11   1   4  297.97   14.20
 -11   1  -4  310.87   14.00
  11   1   4  311.17   14.70
 -12  -1  -4   95.99    4.70
  12  -1   4   96.89    5.30
  12   1   4   92.89    5.30
 -12   1  -4   98.09    4.90
  12   1   4  100.39    5.90
  13  -1   4  155.48    8.10
 -13   1  -4  164.08    7.70
  13   1   4  158.18    8.10
  14  -1   4   24.20    2.80
  14   1   4   24.60    2.70
 -14   1  -4   19.10    3.30
 -14   1  -4   24.80    2.10
  15  -1   4   23.20    2.90
 -15  -1  -4   23.60    3.20
  15   1   4   28.60    2.90
 -15   1  -4   22.10    3.30
  16  -1   4   16.90    2.80
 -16  -1  -4   16.80    2.90
  16   1   4   19.40    3.10
 -16   1  -4   14.60    2.50
 -17  -1  -4    6.80    2.50
  17  -1   4    6.50    1.80
 -17   1  -4    5.30    2.20
  17   1   4    9.00    2.10
 -18  -1  -4    0.90    2.30
  18  -1   4    1.50    1.90
  18   1   4    4.20    1.90
 -18   1  -4    0.90    2.00
 -19  -1  -4   -0.20    2.30
  19  -1   4    2.60    2.10
 -19   1  -4    0.40    2.20
  19   1   4    2.10    1.70
  20  -1   4    0.80    2.10
 -20  -1  -4   -1.50    2.20
  20   1   4    2.00    2.00
 -20   1  -4   -3.90    2.10
  21  -1   4    2.10    2.10
 -21  -1  -4    1.90    2.30
  21   1   4    3.80    2.40
 -21   1  -4    2.10    2.40
 -22  -1  -4    0.20    2.30
  22  -1   4    0.70    2.20
 -22   1  -4   -0.70    2.40
  22   1   4    4.20    2.30
  23  -1   4    2.50    2.50
 -23  -1  -4   -2.20    2.40
 -23   1  -4    0.50    2.50
  23   1   4   -0.80    2.50
 -24  -1  -4    0.10    2.50
  24  -1   4   -3.30    2.70
  24   1   4    0.10    2.60
 -24   1  -4   -2.90    2.60
  25  -1   4    7.30    2.80
 -25  -1  -4    5.80    3.00
 -25   1  -4    4.10    3.80
  25   1   4    3.20    2.70
 -27  -2   4    2.80    2.80
  27  -2  -4    4.40    2.80
  27   2  -4    7.40    3.00
 -27   2   4    5.60    2.80
 -26  -2   4    6.70    3.20
  26   2  -4    4.00    4.30
 -26   2   4    0.80    2.60
 -25  -2   4   12.80    2.90
  25  -2  -4   20.30    3.30
  25   2  -4   16.40    3.20
 -25   2   4   10.60    2.80
  24  -2  -4   15.70    3.00
 -24  -2   4    9.20    2.90
  24   2  -4   12.80    2.90
 -24   2   4    7.00    2.60
 -23  -2   4   20.20    3.80
  23  -2  -4   15.90    2.70
  23   2  -4   22.40    3.10
 -23   2   4   13.50    3.00
 -22  -2   4   39.40    3.90
  22  -2  -4   38.10    3.80
  22   2  -4   44.10    4.00
 -22   2   4   35.60    4.20
 -21  -2   4   33.80    3.60
  21  -2  -4   37.30    3.70
 -21   2   4   31.90    3.70
  21   2  -4   33.10    3.80
  20  -2  -4    4.10    2.10
 -20  -2   4    1.60    1.90
 -20   2   4    4.00    2.00
  20   2  -4    1.60    1.90
 -19  -2   4    5.30    2.00
  19  -2  -4    7.70    2.10
  19   2  -4    5.90    1.90
 -19   2   4    9.60    2.10
 -18  -2   4   49.20    4.20
  18  -2  -4   60.19    4.20
  18   2  -4   61.29    4.20
 -18   2   4   54.99    4.00
 -17  -2   4   16.80    3.30
 -17   2   4   21.60    2.80
  16  -2  -4    1.30    1.60
 -16  -2   4    2.60    1.50
  16   2  -4    1.30    1.60
 -16   2   4    3.60    1.50
 -15  -2   4  161.98    8.10
  15  -2  -4  152.98    8.10
 -15   2   4  163.08    7.50
 -15   2   4  164.38    7.90
  15   2  -4  144.39    8.00
  14  -2  -4   90.59    5.30
 -14  -2   4   97.39    5.40
 -14   2   4   99.29    4.70
 -14   2   4   91.19    5.10
  14   2  -4   91.99    5.30
 -13  -2   4  104.39    5.40
  13  -2  -4   92.39    5.30
  13   2  -4   95.79    5.40
 -13   2   4  103.59    5.20
 -13   2   4   96.19    4.80
  12  -2  -4   28.60    2.40
 -12  -2   4   32.30    2.70
  12   2  -4   31.50    2.50
 -12   2   4   30.30    2.40
 -12   2   4   28.80    1.90
  11  -2  -4  231.28   11.10
 -11  -2   4  233.88   11.10
 -11   2   4  236.38   10.90
  11   2  -4  218.38   11.10
 -11   2   4  240.38   10.70
 -10  -2   4  468.25   21.30
  10  -2  -4  458.75   21.20
 -10   2   4  463.65   21.00
 -10   2   4  461.15   21.10
  10   2  -4  454.55   21.30
  -9  -2   4  392.06   17.60
  -9   2   4  373.56   17.50
   9   2  -4  377.66   17.60
  -9   2   4  381.66   17.40
   8  -2  -4  805.92   37.80
  -8  -2   4  800.52   37.80
  -8   2   4  830.02   37.70
   8   2  -4  847.92   37.50
   8   2  -4  823.12   37.90
  -8   2   4  900.81   38.20
  -7  -2   4   83.59    4.20
   7  -2  -4   79.89    4.20
   7   2  -4   83.99    3.90
  -7   2   4   84.89    4.10
  -7   2   4   82.49    4.00
   7   2  -4   79.49    4.20
  -6  -2   4  440.26   19.80
   6  -2  -4  436.66   19.80
  -6   2   4  437.26   19.70
   6   2  -4  424.36   19.80
  -6   2   4  420.66   19.70
   6   2  -4  441.76   19.60
  -5  -2   4  155.88    7.00
   5  -2  -4  145.09    7.00
   5   2  -4  153.08    6.90
  -5   2   4  140.99    6.90
  -5   2   4  145.79    6.90
   5   2  -4  149.69    7.10
   4  -2  -4 1346.67   60.89
  -4  -2   4 1366.56   60.79
   4   2  -4 1340.37   60.89
   4   2  -4 1351.96   60.79
   3  -2  -4  980.10   43.90
   3   2  -4  937.81   43.90
  -3   2   4 1005.20   43.90
   3   2  -4  966.80   43.80
   2  -2  -4  206.08    9.30
  -2  -2   4  196.98    9.20
   2   2  -4  204.68    9.30
   2   2  -4  198.68    9.20
  -2   2   4  197.28    9.20
  -2   2   4  200.18    9.40
   1   2  -4  963.00   43.60
   1   2  -4  963.50   43.50
  -1   2   4  970.70   43.70
   0  -2   4  770.52   35.10
   0  -2   4  806.02   35.20
   0   2   4  791.42   35.10
   0   2   4  776.12   35.10
   0   2  -4  739.53   35.10
   0   2   4  780.72   35.40
   1  -2   4  809.52   36.20
   1  -2   4  819.42   36.20
   1   2   4  796.02   36.10
   1   2   4  810.52   36.40
  -1   2  -4  800.82   36.10
   1   2   4  760.22   36.10
   2  -2   4  473.55   20.80
   2  -2   4  460.45   20.80
  -2   2  -4  451.05   20.70
   2   2   4  441.26   20.70
   2   2   4  456.95   21.10
   2   2   4  452.75   20.70
   3  -2   4    8.30    1.30
   3  -2   4    9.90    1.30
   3   2   4    8.90    1.80
  -3   2  -4    8.80    1.20
   3   2   4    9.40    1.10
   3   2   4   10.20    1.00
   4  -2   4    2.50    0.80
   4  -2   4    1.30    0.80
   4   2   4    0.90    0.60
   4   2   4    1.00    1.00
   4   2   4    1.30    0.60
  -4   2  -4    0.70    0.80
   5  -2   4  178.58    8.60
   5   2   4  174.98    8.80
  -5   2  -4  181.88    8.30
   5   2   4  171.48    8.30
  -6  -2  -4   30.90    1.80
   6  -2   4   28.50    2.30
   6  -2   4   27.70    2.10
   6   2   4   28.80    2.70
  -6   2  -4   25.90    1.90
   6   2   4   28.60    2.00
   7  -2   4   48.70    3.00
  -7  -2  -4   44.80    2.40
   7  -2   4   42.70    2.80
   7   2   4   41.90    2.70
   7   2   4   42.00    3.30
  -7   2  -4   48.10    2.60
   8  -2   4   87.09    4.60
   8  -2   4   87.99    4.80
  -8  -2  -4   87.19    4.20
   8   2   4   88.49    4.60
  -8   2  -4   82.19    4.50
   8   2   4   90.49    5.20
   9  -2   4   46.90    3.00
  -9  -2  -4   44.50    2.40
   9  -2   4   44.80    3.20
   9   2   4   46.30    3.60
   9   2   4   45.30    2.90
  -9   2  -4   47.10    2.70
 -10  -2  -4    7.30    1.10
  10  -2   4   14.90    1.90
 -10   2  -4   12.70    1.50
  10   2   4    9.20    1.80
  10   2   4   11.40    1.80
  11  -2   4    3.90    1.40
 -11  -2  -4    3.20    0.80
  11   2   4    5.70    1.90
 -11   2  -4    4.30    1.10
  11   2   4    2.40    1.30
  12  -2   4   51.19    3.60
  12   2   4   49.40    3.50
  12   2   4   57.49    4.30
 -12   2  -4   57.49    3.20
  13  -2   4    8.10    1.70
  13   2   4    7.30    1.60
 -13   2  -4   12.30    2.10
 -13   2  -4   11.80    1.50
  14  -2   4    2.40    1.60
  14   2   4    3.20    1.60
 -14   2  -4    3.70    1.80
 -14   2  -4    3.30    1.20
  15  -2   4   25.20    3.00
  15   2   4   21.30    2.80
 -15   2  -4   26.10    3.30
 -15   2  -4   28.90    2.40
 -16  -2  -4   15.60    2.80
  16  -2   4   20.70    3.00
  16   2   4   22.50    2.90
 -16   2  -4   21.60    3.30
 -17  -2  -4   87.09    6.30
  17  -2   4  100.49    5.80
  17   2   4  106.99    5.80
 -17   2  -4   89.49    6.00
  18  -2   4   27.60    3.30
 -18  -2  -4   19.30    3.90
  18   2   4   29.00    3.30
 -18   2  -4   20.40    3.60
  19  -2   4   44.20    4.00
 -19  -2  -4   30.90    4.30
 -19   2  -4   33.30    4.10
  19   2   4   47.70    4.00
  20  -2   4   -0.90    2.00
 -20  -2  -4    1.80    2.40
  20   2   4    3.30    2.30
 -20   2  -4    2.80    2.30
 -21  -2  -4    1.00    2.40
  21  -2   4    4.10    2.20
  21   2   4    2.70    2.40
 -21   2  -4    3.30    2.50
  22  -2   4   22.90    3.70
 -22  -2  -4   17.00    3.20
  22   2   4   17.70    2.90
 -22   2  -4   14.10    2.90
  23  -2   4    5.70    2.80
 -23  -2  -4    1.00    2.50
 -23   2  -4   -1.90    2.50
  23   2   4    4.10    2.50
 -24  -2  -4    8.60    2.90
  24  -2   4   14.90    3.10
 -24   2  -4    5.90    2.90
  24   2   4    6.20    3.00
  25  -2   4    1.60    2.80
 -25  -2  -4    0.40    2.70
  25   2   4    0.20    3.10
  26  -3  -4    1.00    2.80
 -26  -3   4   -1.40    3.20
  26   3  -4    0.60    3.30
 -26   3   4    1.30    2.50
 -25  -3   4    0.70    2.70
  25  -3  -4   -0.90    2.40
 -25   3   4   -0.80    2.50
  25   3  -4    1.10    2.70
  24  -3  -4    0.90    2.30
 -24  -3   4    1.50    2.80
  24   3  -4    1.50    2.50
 -24   3   4   -5.80    2.40
 -23  -3   4    0.10    2.30
  23  -3  -4   -1.00    2.10
 -23   3   4   -0.20    2.30
  23   3  -4    1.60    2.50
 -22  -3   4   11.70    2.70
  22  -3  -4   10.60    2.50
  22   3  -4   20.10    3.10
 -22   3   4   16.40    2.70
  21  -3  -4    0.80    2.00
 -21  -3   4    0.40    2.10
  21   3  -4    1.90    2.20
 -21   3   4    0.20    2.10
 -20  -3   4   87.79    5.90
  20  -3  -4   92.19    5.70
 -20   3   4   87.09    5.60
  20   3  -4  102.89    5.90
  19  -3  -4    1.20    1.80
 -19  -3   4    1.20    2.00
 -19   3   4   -0.60    1.90
  19   3  -4    0.30    1.90
  18  -3  -4   44.50    4.00
 -18  -3   4   54.39    4.20
 -18   3   4   51.79    3.90
  18   3  -4   55.89    4.10
 -17  -3   4    4.10    1.80
  17  -3  -4    1.90    1.90
 -17   3   4    2.00    1.60
  17   3  -4    0.30    1.60
  16  -3  -4  135.19    7.40
 -16  -3   4  143.79    7.40
 -16   3   4  143.79    7.20
  16   3  -4  125.69    7.30
 -16   3   4  143.49    6.90
 -15  -3   4   60.29    4.10
  15  -3  -4   54.39    3.80
 -15   3   4   59.09    3.30
 -15   3   4   54.99    3.70
  15   3  -4   53.79    3.90
 -14  -3   4  252.97   12.40
  14  -3  -4  259.87   12.40
  14   3  -4  238.38   12.40
 -14   3   4  269.97   12.00
 -14   3   4  261.67   12.20
  13  -3  -4   18.80    2.40
 -13  -3   4   19.20    2.60
 -13   3   4   15.80    1.70
 -13   3   4   17.30    2.10
  13   3  -4   16.10    2.50
 -12  -3   4 1624.14   73.59
  12  -3  -4 1581.04   73.59
 -12   3   4 1662.43   73.39
 -12   3   4 1677.53   73.39
  12   3  -4 1587.04   73.59
 -11  -3   4  377.76   17.80
  11  -3  -4  370.66   17.70
  11   3  -4  372.16   17.80
 -11   3   4  396.06   17.50
 -11   3   4  387.56   17.60
 -10  -3   4  428.96   19.40
  10  -3  -4  426.56   19.40
  10   3  -4  414.26   19.50
  10   3  -4  394.66   18.90
 -10   3   4  434.16   19.20
 -10   3   4  416.76   19.20
   9  -3  -4    0.40    1.00
  -9  -3   4    0.80    1.00
  -9   3   4   -0.50    0.80
   9   3  -4   -0.30    1.00
   9   3  -4    0.50    0.50
  -9   3   4   -0.60    0.70
   8  -3  -4   11.40    1.90
  -8  -3   4   10.30    1.70
   8   3  -4   12.00    1.00
  -8   3   4    9.90    1.30
   8   3  -4   10.80    1.70
  -8   3   4    7.80    1.30
  -7  -3   4   98.79    5.00
   7  -3  -4   99.49    5.10
  -7   3   4   93.99    4.80
   7   3  -4  102.09    4.80
   7   3  -4  104.59    5.20
   6  -3  -4  137.19    6.60
  -6  -3   4  140.59    6.50
  -6   3   4  134.59    6.50
  -6   3   4  124.39    6.50
   6   3  -4  141.79    6.40
   6   3  -4  136.09    6.70
   5  -3  -4   11.70    1.60
  -5  -3   4   11.40    1.30
  -5   3   4   10.00    1.30
   5   3  -4    8.90    1.10
   5   3  -4   10.30    1.50
  -5   3   4   10.30    1.20
   4  -3  -4   96.59    4.70
  -4  -3   4   90.89    4.40
   4   3  -4   90.29    4.50
  -4   3   4   97.79    4.50
  -4   3   4   94.79    4.60
   4   3  -4   83.39    4.70
   3  -3  -4   37.10    2.40
  -3  -3   4   40.90    2.10
   3   3  -4   40.40    2.20
   3   3  -4   38.60    2.40
  -3   3   4   39.80    2.40
  -3   3   4   40.20    2.20
   2  -3  -4  137.09    6.60
  -2  -3   4  134.59    6.30
   2   3  -4  138.79    6.50
  -2   3   4  139.59    6.70
   2   3  -4  134.69    6.60
  -2   3   4  136.39    6.50
  -1  -3   4  137.89    6.10
   1   3  -4  129.79    6.20
  -1   3   4  120.09    6.20
  -1   3   4  138.19    6.50
   1   3  -4  131.19    6.40
   0  -3   4   18.00    1.20
   0   3   4   14.20    1.20
   0   3   4   16.10    1.40
   0   3   4   15.10    1.80
   0   3  -4   18.80    1.50
   1  -3   4    2.00    0.90
   1  -3   4    2.90    0.70
   1   3   4    2.60    0.70
  -1   3  -4    4.00    0.90
   1   3   4    2.80    0.80
   1   3   4    2.50    1.10
   2  -3   4  562.74   25.70
   2  -3   4  586.34   25.80
   2   3   4  564.04   26.10
   2   3   4  571.44   25.80
   2   3   4  566.84   25.70
  -2   3  -4  545.55   25.70
   3  -3   4   15.10    1.40
   3  -3   4   14.70    1.90
   3   3   4   13.40    1.20
   3   3   4   16.90    1.50
   3   3   4   13.60    2.00
   4  -3   4   91.19    4.50
   4  -3   4   88.29    4.40
   4   3   4   87.09    4.20
   4   3   4   88.79    4.40
  -4   3  -4   86.39    4.40
   4   3   4   71.59    5.10
   5  -3   4  279.17   12.50
   5  -3   4  272.07   12.50
   5   3   4  254.97   12.20
   5   3   4  264.47   12.80
   5   3   4  260.47   12.40
  -5   3  -4  267.87   12.40
   6  -3   4  760.32   34.80
   6  -3   4  705.03   35.10
   6   3   4  769.02   34.50
  -6   3  -4  760.62   34.60
   6   3   4  833.02   35.40
   6   3   4  750.32   34.70
   7  -3   4    7.80    1.60
   7  -3   4    7.30    1.20
   7   3   4    6.10    1.60
   7   3   4    7.10    1.10
  -7   3  -4    8.00    1.20
  -8  -3  -4  162.78    7.40
   8  -3   4  158.68    7.80
   8   3   4  153.78    7.70
  -8   3  -4  158.38    7.60
   8   3   4  152.28    8.20
  -9  -3  -4    0.00    0.70
   9  -3   4   -0.70    1.20
  -9   3  -4    1.20    1.20
   9   3   4    0.80    1.00
   9   3   4    1.00    1.30
 -10  -3  -4  190.88    9.20
  10  -3   4  202.08    9.70
  10   3   4  203.78   10.30
 -10   3  -4  209.78    9.60
  10   3   4  192.08    9.70
 -11  -3  -4   -0.80    0.80
  11  -3   4    0.00    1.30
  11   3   4    5.10    1.80
 -11   3  -4    3.50    1.10
 -11   3  -4    2.10    1.40
  11   3   4    0.30    1.20
  12  -3   4  119.49    6.60
  12   3   4  129.49    7.20
 -12   3  -4  128.59    6.30
 -12   3  -4  122.79    6.70
  12   3   4  121.29    6.50
  13  -3   4   15.00    2.30
 -13   3  -4   11.20    1.70
  13   3   4   14.90    2.40
 -13   3  -4    8.70    1.90
  14  -3   4  229.28   11.30
  14   3   4  223.58   11.30
 -14   3  -4  238.98   11.10
 -14   3  -4  228.88   11.40
 -15  -3  -4    5.30    2.60
  15  -3   4    4.60    1.90
  15   3   4    6.20    1.80
 -15   3  -4   10.10    1.70
 -15   3  -4    9.40    2.00
  16  -3   4   10.10    2.20
 -16  -3  -4    5.90    2.50
  16   3   4   10.00    2.10
 -16   3  -4   11.60    2.20
 -17  -3  -4    2.90    2.40
  17  -3   4    6.80    2.00
 -17   3  -4    8.70    2.80
  17   3   4    8.50    2.10
  18  -3   4   19.40    2.80
 -18  -3  -4   16.40    3.00
 -18   3  -4   17.70    3.40
  18   3   4   21.10    2.80
  19  -3   4    4.40    2.20
 -19  -3  -4    1.70    2.40
  19   3   4    2.00    2.10
 -19   3  -4    1.90    2.10
 -20  -3  -4   -0.20    2.40
  20  -3   4    2.00    2.20
 -20   3  -4   -0.20    2.20
  20   3   4    3.10    2.30
 -21  -3  -4    0.50    2.40
  21  -3   4    0.90    2.30
 -21   3  -4   -0.60    2.40
  21   3   4    1.30    2.50
  22  -3   4    1.50    2.40
 -22  -3  -4   -0.20    2.30
  22   3   4   -4.20    2.50
 -22   3  -4   -2.30    2.30
  23  -3   4   16.40    2.90
 -23  -3  -4    9.90    2.90
 -23   3  -4   10.90    3.10
  23   3   4   21.90    3.40
 -24  -3  -4   28.00    5.40
  24   3   4   30.00    4.70
 -25  -3  -4    2.00    2.70
  25  -3   4    2.30    2.80
 -26  -4   4   10.30    3.30
  26  -4  -4   16.90    3.30
  26   4  -4   23.90    3.90
 -26   4   4   32.40    5.00
  25  -4  -4   39.90    4.40
 -25  -4   4   24.80    4.40
  25   4  -4   33.90    4.60
 -25   4   4   33.40    4.40
  24  -4  -4    9.70    2.90
 -24  -4   4    4.60    3.00
 -24   4   4    8.50    2.60
  24   4  -4    5.70    2.80
 -23  -4   4   24.20    3.90
  23  -4  -4   25.70    3.40
 -23   4   4   27.80    3.90
  23   4  -4   24.40    4.10
 -22  -4   4    6.00    2.50
  22  -4  -4   10.20    2.80
  22   4  -4    9.50    2.90
 -22   4   4    4.70    2.30
  21  -4  -4    6.60    2.50
 -21  -4   4    4.50    2.30
 -21   4   4    4.80    2.20
  21   4  -4    5.20    2.40
 -20  -4   4    4.00    2.30
  20  -4  -4    3.60    2.10
 -20   4   4    3.60    2.10
  20   4  -4    5.50    2.50
 -19  -4   4    3.70    2.10
  19  -4  -4    3.10    2.10
  19   4  -4    2.70    2.20
 -19   4   4    3.50    2.00
 -18  -4   4  168.18    9.00
  18  -4  -4  174.48    9.00
  18   4  -4  171.08    9.00
 -18   4   4  165.48    8.60
  17  -4  -4   50.09    4.10
 -17  -4   4   52.49    4.20
 -17   4   4   51.89    3.80
  17   4  -4   50.69    4.20
 -17   4   4   57.19    3.50
  16  -4  -4   40.40    3.90
 -16  -4   4   40.10    5.10
 -16   4   4   41.70    2.90
  16   4  -4   43.70    3.80
 -16   4   4   40.80    3.20
 -15  -4   4  174.38    9.20
  15  -4  -4  178.28    9.10
  15   4  -4  181.08    9.30
 -15   4   4  179.58    8.90
 -15   4   4  190.08    8.80
 -14  -4   4   17.80    2.80
  14  -4  -4   16.50    2.70
  14   4  -4    9.40    2.00
 -14   4   4   11.50    2.00
 -14   4   4   14.40    2.10
 -13  -4   4  301.87   14.00
  13  -4  -4  290.87   14.00
 -13   4   4  288.77   13.70
  13   4  -4  278.57   14.00
 -13   4   4  301.87   13.70
  12  -4  -4   26.40    2.80
 -12  -4   4   27.30    2.80
 -12   4   4   27.40    2.10
 -12   4   4   25.80    2.20
  12   4  -4   25.80    2.60
  11  -4  -4  120.19    6.40
 -11  -4   4  131.39    6.50
 -11   4   4  126.39    6.20
  11   4  -4  121.79    6.60
  11   4  -4  123.69    5.80
 -10  -4   4   10.90    2.00
  10  -4  -4   11.80    1.80
  10   4  -4    9.10    1.60
 -10   4   4    8.50    1.40
 -10   4   4    8.60    1.50
  10   4  -4    8.80    1.00
   9  -4  -4   31.90    2.60
  -9  -4   4   35.40    2.50
   9   4  -4   32.60    1.90
  -9   4   4   28.80    2.10
   9   4  -4   30.70    2.60
  -9   4   4   32.70    2.10
   8  -4  -4  215.58   10.20
  -8  -4   4  215.98   10.30
   8   4  -4  213.28   10.30
  -8   4   4  207.98   10.00
   8   4  -4  217.98    9.90
   7  -4  -4   27.10    2.30
  -7  -4   4   28.70    2.10
  -7   4   4   29.80    2.00
   7   4  -4   28.40    2.40
  -7   4   4   28.90    2.00
   7   4  -4   29.90    1.90
  -6  -4   4  392.26   18.20
   6  -4  -4  390.56   18.30
   6   4  -4  394.16   18.50
   6   4  -4  403.66   18.20
  -6   4   4  400.56   18.20
  -6   4   4  399.86   18.20
  -5  -4   4  217.48    9.70
   5  -4  -4  205.78    9.90
  -5   4   4  208.18    9.80
   5   4  -4  206.28    9.90
  -5   4   4  195.38    9.70
   5   4  -4  209.88    9.70
  -4  -4   4    4.10    0.80
   4  -4  -4    2.10    1.00
   4   4  -4    5.00    1.00
  -4   4   4    4.40    1.00
  -4   4   4    2.30    0.90
   4   4  -4    4.60    1.20
  -3  -4   4   41.60    2.20
   3   4  -4   42.20    2.80
   3   4  -4   40.60    2.40
  -3   4   4   36.40    2.30
  -3   4   4   39.70    2.50
  -2  -4   4   78.49    3.80
   2  -4  -4   83.09    4.30
  -2   4   4   81.09    4.10
   2   4  -4   76.59    4.30
  -2   4   4   83.39    4.30
  -1  -4   4  671.13   31.00
  -1   4   4  729.13   31.40
  -1   4   4  665.43   31.10
   1   4  -4  695.83   31.30
   1   4  -4  673.63   31.20
   0  -4   4  833.62   37.10
   0   4   4  850.41   37.60
   0   4  -4  777.12   37.30
   0   4   4  849.22   37.40
   0   4   4  805.72   37.30
   1  -4   4  238.18   10.90
  -1   4  -4  223.08   10.70
   1   4   4  226.38   10.80
   1   4   4  220.38   10.60
   1   4   4  237.98   11.00
   2  -4   4  154.58    7.20
   2   4   4  133.09    7.00
   2   4   4  144.79    7.30
  -2   4  -4  146.59    7.00
   3  -4   4  121.39    6.00
   3  -4   4  121.09    5.50
  -3   4  -4  109.99    5.80
   3   4   4  119.89    5.90
   3   4   4  115.39    6.20
   4   4   4  622.44   27.40
   4   4   4  548.85   27.20
   4   4   4  607.74   27.70
  -4   4  -4  612.24   27.30
   5  -4   4  247.08   11.40
  -5   4  -4  231.08   11.40
   5   4   4  247.48   11.10
   5   4   4  229.38   11.30
   5   4   4  244.08   11.80
   6  -4   4    8.70    1.30
  -6   4  -4    6.30    1.20
   6   4   4    8.00    1.10
   6   4   4    6.40    1.60
   6   4   4    7.30    1.20
   7  -4   4    4.10    1.20
   7   4   4    4.80    0.90
   7   4   4    4.60    1.50
  -7   4  -4    6.30    1.30
   7   4   4    4.30    1.20
   8  -4   4   34.60    2.70
   8   4   4   34.10    3.20
  -8   4  -4   33.40    2.50
   8   4   4   34.40    2.10
   8   4   4   33.70    2.70
   9  -4   4  112.69    6.00
   9   4   4  109.09    5.90
   9   4   4  109.49    6.40
  -9   4  -4  117.49    5.80
  -9   4  -4  110.89    5.70
  10  -4   4  138.79    7.00
 -10  -4  -4  139.99    6.50
  10   4   4  132.59    7.50
  10   4   4  128.89    7.00
 -10   4  -4  132.69    6.80
  11  -4   4   12.60    2.00
 -11  -4  -4   12.50    1.60
  11   4   4   15.90    3.00
  11   4   4   12.10    2.00
 -11   4  -4   11.80    2.20
 -11   4  -4   10.30    1.60
  12  -4   4    2.50    1.50
 -12   4  -4   -1.30    1.20
 -12   4  -4    2.40    1.40
  12   4   4    0.50    1.60
  13  -4   4  110.79    6.30
 -13   4  -4  116.59    6.30
 -13   4  -4  119.69    6.20
  13   4   4  113.09    6.40
 -14   4  -4   65.09    4.50
  14   4   4   67.09    4.60
 -14   4  -4   70.79    4.20
 -15  -4  -4    3.00    2.70
  15  -4   4    8.60    2.20
 -15   4  -4    4.70    1.70
 -15   4  -4    7.20    1.90
  15   4   4    9.10    2.20
 -16  -4  -4   12.00    2.90
  16  -4   4   14.20    2.40
 -16   4  -4   21.70    2.70
  16   4   4   14.90    2.50
 -16   4  -4   14.70    2.90
  17  -4   4    3.90    2.00
 -17  -4  -4    0.40    2.30
  17   4   4    1.00    2.00
 -17   4  -4    0.00    1.90
  18  -4   4   46.70    4.20
 -18  -4  -4   38.30    4.70
 -18   4  -4   38.70    4.00
  18   4   4   42.10    4.20
  19  -4   4   15.00    2.70
 -19  -4  -4   10.10    2.80
  19   4   4   15.50    2.90
 -19   4  -4   16.10    2.80
  20  -4   4   15.60    2.70
 -20  -4  -4   17.30    3.10
 -20   4  -4   15.40    3.00
  20   4   4   25.10    3.40
  21  -4   4   11.40    2.80
 -21  -4  -4   14.20    3.20
 -21   4  -4    7.70    2.60
  21   4   4   11.10    2.90
 -22  -4  -4    2.90    2.70
  22  -4   4    0.70    2.70
  22   4   4    5.80    2.90
 -22   4  -4   -2.40    2.60
  23  -4   4   49.10    4.90
 -23  -4  -4   44.50    4.70
 -23   4  -4   29.40    4.20
 -24  -4  -4    1.70    2.70
  24  -4   4    3.80    2.80
  24   4   4   10.30    3.50
 -24   4  -4   -1.80    2.90
  26  -5  -4   -0.10    2.70
 -25  -5   4   13.70    3.80
  25  -5  -4   14.30    3.40
  25   5  -4   13.60    3.70
  24  -5  -4   -2.00    2.60
 -24  -5   4    0.90    2.70
  24   5  -4    1.60    2.90
  23  -5  -4    2.70    2.80
 -23  -5   4    1.00    2.70
  23   5  -4    2.00    2.80
 -23   5   4    6.50    2.80
  22  -5  -4   -1.60    2.50
 -22  -5   4   -1.00    2.50
 -22   5   4    7.20    2.50
  22   5  -4    0.00    2.80
  21  -5  -4   32.30    4.40
 -21  -5   4   32.80    4.00
 -21   5   4   40.40    4.10
  21   5  -4   43.00    4.60
  20  -5  -4   91.69    6.20
 -20  -5   4   89.89    5.90
  20   5  -4   96.49    6.20
 -20   5   4  103.59    6.00
 -19  -5   4  110.99    6.80
  19  -5  -4  128.19    7.10
  19   5  -4  120.99    7.10
 -19   5   4  114.09    7.10
  18  -5  -4   23.50    3.50
 -18  -5   4   28.50    3.50
  18   5  -4   23.20    3.50
 -18   5   4   28.30    3.20
  17  -5  -4  130.69    7.30
 -17  -5   4  125.39    7.20
 -17   5   4  129.29    6.90
  17   5  -4  124.69    7.40
 -17   5   4  142.49    6.90
 -16  -5   4   57.49    4.40
  16  -5  -4   60.39    4.50
 -16   5   4   58.89    3.80
  16   5  -4   59.69    4.60
 -16   5   4   62.69    4.00
 -15  -5   4  119.69    6.40
  15  -5  -4   87.99    7.50
  15   5  -4  106.19    6.60
 -15   5   4  117.69    6.00
 -15   5   4  121.69    6.10
 -14  -5   4   11.30    2.10
  14  -5  -4    9.80    2.00
  14   5  -4    8.60    2.00
 -14   5   4    8.30    1.50
 -14   5   4   13.10    2.20
  13  -5  -4    2.50    1.60
 -13  -5   4    0.00    1.50
  13   5  -4    1.80    1.60
 -13   5   4    2.10    1.30
 -13   5   4    1.30    1.20
  12  -5  -4   -3.00    1.60
 -12  -5   4    4.40    1.60
  12   5  -4    1.30    0.80
 -12   5   4    0.50    1.10
 -12   5   4    2.10    1.10
  12   5  -4   -1.00    1.60
  11  -5  -4   20.20    2.60
 -11  -5   4   19.60    2.50
 -11   5   4   19.50    2.00
  11   5  -4   17.30    2.40
 -11   5   4   18.80    2.00
  11   5  -4   15.50    1.50
  10  -5  -4  111.99    6.00
 -10  -5   4  117.09    5.90
  10   5  -4  103.99    5.30
  10   5  -4  106.69    6.00
 -10   5   4  114.19    5.60
 -10   5   4  106.09    5.60
   9  -5  -4   32.40    2.80
  -9  -5   4   34.20    2.60
  -9   5   4   29.00    2.20
   9   5  -4   34.40    2.10
  -9   5   4   32.00    2.30
   9   5  -4   27.30    2.80
   8  -5  -4    0.70    1.20
  -8  -5   4    0.10    1.10
  -8   5   4    1.30    0.80
   8   5  -4   -0.70    1.20
  -8   5   4   -0.10    1.00
   7  -5  -4  198.38    9.60
  -7  -5   4  196.98    9.40
  -7   5   4  200.78    9.40
   7   5  -4  195.08    9.70
  -7   5   4  197.88    9.50
   7   5  -4  200.38    9.40
   6  -5  -4   14.20    2.00
  -6  -5   4   13.30    1.70
   6   5  -4   14.10    2.20
   6   5  -4   13.00    1.60
  -6   5   4   11.50    1.50
  -6   5   4   15.70    1.60
  -5  -5   4   57.99    3.00
   5  -5  -4   53.99    3.40
  -5   5   4   58.19    3.20
   5   5  -4   53.79    3.10
   5   5  -4   56.19    3.60
  -5   5   4   51.59    3.20
  -4  -5   4   15.00    1.30
  -4   5   4   15.30    1.60
  -4   5   4   10.40    1.40
   4   5  -4   14.50    2.10
   4   5  -4   11.80    1.60
   3  -5  -4    1.50    1.20
  -3  -5   4    0.30    0.60
  -3   5   4    0.30    0.90
   3   5  -4   -0.40    0.90
   3   5  -4    1.40    1.10
  -3   5   4   -1.90    0.80
   2  -5  -4    2.80    1.20
  -2  -5   4    5.00    0.70
  -2   5   4    4.20    1.10
   2   5  -4    4.40    1.30
  -2   5   4    4.90    1.00
   2   5  -4    3.90    1.00
  -1  -5   4  163.78    7.20
  -1   5   4  149.88    7.40
   1   5  -4  144.99    7.60
  -1   5   4  158.68    7.60
   0  -5   4  398.26   18.10
   0   5   4  378.86   18.00
   0   5   4  393.76   18.10
   0   5  -4  378.36   17.90
   1  -5   4    2.60    1.30
   1   5   4    3.70    1.00
   1   5   4    1.90    1.10
  -1   5  -4    2.70    1.10
   1   5   4    2.90    1.20
   2  -5   4  185.18    9.10
   2   5   4  190.98    9.20
   2   5   4  183.28    8.80
  -2   5  -4  183.28    8.90
   2   5   4  189.48    9.10
   3  -5   4    7.40    1.30
  -3   5  -4    8.40    1.30
   3   5   4    6.70    1.50
   3   5   4    6.70    1.00
   4  -5   4   -0.40    1.20
   4   5   4   -0.40    0.70
   4   5   4    0.60    1.20
  -4   5  -4    0.10    1.10
   4   5   4    0.60    1.00
   5  -5   4    7.60    1.40
  -5   5  -4   10.10    1.40
   5   5   4   12.30    1.30
  -5   5  -4    9.60    0.90
   5   5   4   11.30    1.90
   5   5   4    9.60    2.00
   6  -5   4  147.19    7.50
   6   5   4  148.89    7.90
   6   5   4  149.88    7.50
   6   5   4  143.49    7.20
  -6   5  -4  162.38    7.00
  -6   5  -4  142.49    7.30
   7  -5   4  386.66   18.10
  -7   5  -4  389.96   17.90
   7   5   4  371.56   18.40
   7   5   4  376.06   18.00
   7   5   4  375.16   17.70
  -7   5  -4  414.46   17.70
   8  -5   4   24.30    2.50
   8   5   4   23.40    1.90
  -8   5  -4   21.50    1.90
   8   5   4   27.10    2.60
   8   5   4   25.90    2.90
  -8   5  -4   24.00    2.40
   9  -5   4    5.60    1.50
   9   5   4    5.60    1.10
  -9   5  -4    5.50    1.50
  -9   5  -4    7.00    1.30
   9   5   4    7.70    1.60
   9   5   4    4.80    1.80
  10  -5   4    7.20    1.70
 -10   5  -4    7.60    1.70
 -10   5  -4    8.10    1.30
  10   5   4    6.00    2.00
  10   5   4    4.60    1.60
  10   5   4    5.60    1.90
  11  -5   4  205.68   10.10
  11   5   4  208.18   10.60
 -11   5  -4  194.98    9.90
 -11   5  -4  207.78    9.80
  11   5   4  197.88   10.10
  12  -5   4   21.60    3.00
 -12   5  -4   22.60    2.40
  12   5   4   19.60    2.70
 -12   5  -4   20.60    2.50
 -13   5  -4   28.40    2.80
  13   5   4   29.50    3.30
 -13   5  -4   26.90    2.80
 -14  -5  -4   -5.90    2.40
  14  -5   4   -1.20    1.70
 -14   5  -4    0.60    1.50
 -14   5  -4   -1.30    1.50
  14   5   4   -0.40    2.00
  15  -5   4    9.70    2.10
 -15  -5  -4    8.90    3.00
 -15   5  -4    8.40    2.00
 -15   5  -4   16.40    2.20
  15   5   4   11.00    2.30
  16  -5   4   16.00    2.70
 -16  -5  -4    9.70    2.90
 -16   5  -4   17.70    2.90
  16   5   4   11.50    2.40
 -16   5  -4    9.90    2.20
  17  -5   4   38.30    3.90
 -17  -5  -4   26.80    4.60
 -17   5  -4   27.50    3.60
 -17   5  -4   40.60    3.80
  17   5   4   36.90    4.10
  18  -5   4   -2.40    2.10
 -18  -5  -4   -3.60    2.60
  18   5   4    0.90    2.30
 -18   5  -4   -3.90    1.90
 -19  -5  -4    1.50    2.60
  19  -5   4    6.50    2.60
 -19   5  -4   -2.20    2.30
  19   5   4    0.20    2.60
 -20  -5  -4   17.10    3.30
  20  -5   4   14.80    2.90
 -20   5  -4    7.10    2.80
  20   5   4   14.90    3.30
 -21  -5  -4    2.50    2.60
  21  -5   4    1.90    2.60
 -21   5  -4   -4.00    2.70
  21   5   4    2.60    2.90
  22  -5   4    2.50    2.90
 -22  -5  -4   -0.10    2.70
  22   5   4   -2.30    2.80
  23  -5   4    1.80    4.10
 -23  -5  -4    4.50    3.00
  23   5   4    8.30    3.70
 -24  -5  -4    4.60    3.20
  24  -5   4    6.80    3.00
  24   5   4    5.40    3.40
  25  -6  -4   23.10    3.80
 -25  -6   4   15.90    3.20
  25   6  -4   18.30    3.80
 -24  -6   4   82.39    7.30
  23  -6  -4   69.69    5.60
 -23  -6   4   65.69    5.70
  23   6  -4   61.99    5.80
  22  -6  -4   51.99    5.00
 -22  -6   4   41.20    4.60
  22   6  -4   48.30    5.00
 -21  -6   4    2.20    2.50
  21  -6  -4    6.00    2.70
  21   6  -4    5.40    2.90
  20  -6  -4    5.10    2.70
  20   6  -4    4.50    2.80
 -19  -6   4    4.40    2.20
  19  -6  -4    2.10    2.30
  19   6  -4    3.10    2.60
 -19   6   4    3.00    2.90
 -18  -6   4   11.00    2.50
  18  -6  -4   10.90    2.70
 -18   6   4   18.90    2.80
  18   6  -4   10.90    2.70
  17  -6  -4   -2.20    1.80
 -17  -6   4    0.60    2.10
 -17   6   4   -0.90    1.50
  17   6  -4    2.00    2.10
  16  -6  -4   -0.40    2.10
 -16  -6   4    3.70    2.10
  16   6  -4    3.20    2.20
 -16   6   4   -0.30    1.50
  15  -6  -4   19.10    2.70
 -15  -6   4   17.80    3.10
  15   6  -4   17.80    2.70
 -15   6   4   11.00    1.90
  14  -6  -4    3.70    2.10
 -14  -6   4    6.70    1.90
 -14   6   4    7.70    1.70
  14   6  -4    3.50    2.00
  13  -6  -4  111.29    6.20
 -13  -6   4   91.39    6.00
 -13   6   4  117.49    5.90
 -13   6   4  111.99    5.80
  13   6  -4  105.39    6.30
  12  -6  -4   89.49    5.30
 -12  -6   4   95.59    5.30
  12   6  -4   87.89    5.40
 -12   6   4   86.59    5.00
  12   6  -4   87.69    4.50
 -11  -6   4   23.50    2.70
  11  -6  -4   22.60    2.90
  11   6  -4   20.40    1.80
 -11   6   4   17.70    2.30
 -11   6   4   20.10    2.10
  11   6  -4   18.20    3.00
  10  -6  -4   73.59    4.50
 -10  -6   4   75.89    4.40
  10   6  -4   69.69    3.90
 -10   6   4   73.29    4.20
 -10   6   4   66.49    5.00
  10   6  -4   75.49    4.80
   9  -6  -4   78.39    4.50
  -9  -6   4   74.99    4.30
  -9   6   4   76.89    4.20
   9   6  -4   72.09    4.00
   9   6  -4   71.09    4.50
  -9   6   4   71.29    4.10
   8  -6  -4   78.19    4.60
  -8  -6   4   76.29    4.30
   8   6  -4   74.49    4.10
   8   6  -4   77.59    4.80
  -8   6   4   78.79    4.20
  -8   6   4   77.49    4.30
   7  -6  -4    7.80    1.70
  -7  -6   4    7.50    1.50
   7   6  -4    7.80    1.50
  -7   6   4    9.90    1.70
   7   6  -4    4.90    1.60
  -7   6   4    5.70    1.30
  -6  -6   4  254.47   11.60
   6  -6  -4  236.98   11.90
   6   6  -4  254.27   12.10
  -6   6   4  247.88   11.70
   6   6  -4  252.37   11.60
  -6   6   4  234.18   11.70
   5  -6  -4  193.88    9.80
  -5   6   4  202.98    9.60
   5   6  -4  201.08    9.60
   5   6  -4  198.58   10.00
  -5   6   4  205.38    9.60
  -4  -6   4  817.02   36.00
   4  -6  -4  787.82   36.40
  -4   6   4  738.23   36.20
  -4   6   4  815.62   36.20
   4   6  -4  794.82   36.20
   4   6  -4  823.12   36.60
  -3  -6   4  163.78    7.60
   3  -6  -4  158.98    8.20
   3   6  -4  163.38    8.30
  -3   6   4  166.88    7.90
   3   6  -4  161.78    7.90
  -3   6   4  162.68    7.90
  -2  -6   4   32.10    1.70
   2  -6  -4   30.40    2.70
   2   6  -4   28.40    2.30
  -2   6   4   27.20    2.30
  -2   6   4   25.80    2.20
   2   6  -4   31.40    2.80
   1  -6  -4   65.19    3.90
  -1   6   4   64.89    3.70
  -1   6   4   61.29    3.50
   1   6  -4   62.29    3.70
   0  -6   4  120.79    6.40
   0   6   4  127.79    6.40
   0   6   4  124.29    6.20
   0   6  -4  123.29    6.30
   1  -6   4   35.80    2.90
   1   6   4   36.10    2.70
  -1   6  -4   34.00    2.50
   1   6   4   36.30    2.40
   1   6   4   37.00    2.80
   2  -6   4  291.07   13.80
   2   6   4  287.17   13.50
  -2   6  -4  282.47   13.60
   2   6   4  293.17   13.80
   3  -6   4    0.80    1.30
   3   6   4    2.50    1.30
   3   6   4    1.90    1.30
  -3   6  -4    0.30    1.10
   3   6   4    1.80    0.90
   4  -6   4   33.40    2.90
   4   6   4   39.10    3.10
  -4   6  -4   33.70    2.60
   4   6   4   36.80    2.90
   4   6   4   36.50    2.30
   5  -6   4   35.10    2.90
  -5   6  -4   32.30    2.70
   5   6   4   32.40    3.00
   5   6   4   38.60    3.00
   5   6   4   34.70    2.30
   6  -6   4   92.39    5.30
  -6   6  -4   94.09    5.10
   6   6   4   93.49    5.40
   6   6   4   88.99    5.20
   6   6   4   90.99    4.80
   7  -6   4  142.69    7.30
   7   6   4  132.59    7.50
  -7   6  -4  136.79    7.20
  -7   6  -4  157.68    6.60
   7   6   4  137.19    7.30
   7   6   4  130.29    6.80
   8  -6   4    2.40    1.60
  -8   6  -4    2.30    0.90
   8   6   4    4.80    1.10
   8   6   4    1.50    1.40
   8   6   4    3.90    1.80
  -8   6  -4    4.20    1.50
   9  -6   4   -0.30    1.50
   9   6   4    1.80    1.70
   9   6   4    0.70    1.20
  -9   6  -4   -1.80    1.30
   9   6   4    0.90    1.60
  10  -6   4    0.80    1.70
 -10   6  -4    1.00    1.40
  10   6   4    1.00    1.70
 -10   6  -4   -1.70    1.60
  10   6   4    1.00    1.30
  10   6   4    0.10    1.60
  11  -6   4   54.99    4.00
  11   6   4   60.79    4.20
 -11   6  -4   54.19    3.80
  11   6   4   57.69    3.50
 -11   6  -4   53.09    3.40
  12  -6   4   32.80    3.40
  12   6   4   30.40    3.40
 -12   6  -4   33.40    2.90
 -12   6  -4   23.70    2.60
  13  -6   4   -0.90    2.00
  13   6   4    1.90    2.00
 -13   6  -4   -3.00    1.40
 -13   6  -4   -0.20    1.50
 -14  -6  -4   -0.30    2.50
  14  -6   4    5.00    2.20
  14   6   4    3.50    2.10
 -14   6  -4    0.20    1.80
 -14   6  -4    4.30    1.80
  15  -6   4    5.80    2.20
 -15  -6  -4   -2.10    2.50
  15   6   4    4.10    2.20
 -15   6  -4    4.10    1.90
  16  -6   4   89.99    5.60
 -16  -6  -4   69.19    6.10
 -16   6  -4   84.99    5.40
  16   6   4   84.19    5.80
  17  -6   4    1.40    2.10
 -17  -6  -4   -0.60    2.90
 -17   6  -4    3.10    2.30
  17   6   4    1.60    2.30
  18  -6   4   29.50    4.00
 -18   6  -4   26.70    4.30
  18   6   4   35.00    4.40
 -19  -6  -4   -2.90    2.60
  19  -6   4   -0.70    2.50
  19   6   4    2.40    2.70
  20  -6   4    9.20    2.80
 -20  -6  -4   15.60    3.50
  20   6   4    8.60    3.00
  21  -6   4   10.90    3.30
  21   6   4   11.00    3.40
 -22  -6  -4   44.10    6.70
  22  -6   4   55.39    5.50
  22   6   4   45.60    5.50
  23  -6   4   19.10    3.40
 -23  -6  -4   11.40    3.40
  23   6   4   15.60    4.10
  24  -7  -4   -1.60    3.00
 -24  -7   4    0.10    3.00
  24   7  -4    7.00    3.40
  23  -7  -4   70.79    6.00
 -23  -7   4   44.20    5.20
  23   7  -4   57.79    6.10
 -22  -7   4    6.40    3.30
  22  -7  -4    2.50    3.10
  22   7  -4    4.50    3.30
  21  -7  -4    6.50    3.00
 -21  -7   4    1.80    2.80
  21   7  -4    6.70    3.20
  20  -7  -4   28.10    4.20
 -20  -7   4   25.30    4.20
  20   7  -4   27.60    4.60
 -19  -7   4   -0.60    2.50
  19  -7  -4    0.90    2.70
 -19   7   4    4.30    2.10
  19   7  -4   -1.20    2.50
  18  -7  -4    4.60    2.40
 -18  -7   4    2.30    2.50
 -18   7   4    5.00    2.10
  18   7  -4    1.00    2.40
 -17  -7   4   23.60    3.70
  17  -7  -4   23.70    3.90
  17   7  -4   28.10    4.10
  16  -7  -4   44.00    4.20
 -16  -7   4   39.00    3.90
  16   7  -4   39.90    4.30
 -16   7   4   39.30    4.70
  15  -7  -4   68.99    4.80
 -15  -7   4   59.19    4.80
  15   7  -4   60.69    4.90
 -15   7   4   63.79    4.30
  14  -7  -4   62.69    4.70
  14   7  -4   64.29    4.90
 -14   7   4   63.19    4.10
  13  -7  -4   16.10    2.70
 -13  -7   4   14.50    2.40
 -13   7   4   14.40    2.30
  13   7  -4   12.40    2.60
  12  -7  -4  111.09    7.90
 -12  -7   4  119.99    6.80
  12   7  -4  115.79    7.00
 -12   7   4  135.79    6.60
  12   7  -4  139.49    6.60
 -11  -7   4    1.50    1.60
  11  -7  -4    0.90    1.70
  11   7  -4    2.70    2.00
  11   7  -4    3.60    1.10
 -11   7   4    2.90    1.40
  10  -7  -4   96.29    5.50
 -10  -7   4   94.59    5.30
 -10   7   4   84.69    5.00
  10   7  -4   87.19    4.80
  10   7  -4   92.39    5.70
   9  -7  -4  156.98    8.30
  -9  -7   4  159.38    8.00
   9   7  -4  152.48    8.30
   9   7  -4  164.58    7.80
  -9   7   4  158.28    7.90
   8  -7  -4    3.30    1.80
  -8  -7   4    0.90    1.30
  -8   7   4    1.90    1.30
   8   7  -4    2.10    1.90
  -8   7   4    7.00    2.20
   8   7  -4    0.50    1.20
  -7  -7   4    6.00    1.40
   7  -7  -4    5.60    1.80
   7   7  -4    6.10    1.40
  -7   7   4    4.90    1.40
   7   7  -4    7.10    2.00
  -7   7   4    7.90    2.00
   6  -7  -4  525.25   25.10
  -6  -7   4  559.64   24.70
   6   7  -4  537.95   24.90
  -6   7   4  578.74   25.30
  -6   7   4  497.25   24.80
   6   7  -4  544.15   25.30
   5  -7  -4    3.20    1.60
  -5  -7   4    2.80    1.10
  -5   7   4    3.30    1.30
   5   7  -4    7.00    1.40
   5   7  -4    8.40    2.00
   4  -7  -4   10.10    1.80
  -4  -7   4    8.30    1.10
   4   7  -4   10.20    1.90
  -4   7   4    7.90    1.50
  -4   7   4    8.60    1.50
   4   7  -4    9.10    1.50
   3  -7  -4   20.50    2.70
  -3  -7   4   24.50    1.60
   3   7  -4   19.10    2.80
  -3   7   4   16.10    2.10
   3   7  -4   20.30    2.20
  -3   7   4   19.50    1.90
   2  -7  -4   15.40    2.40
  -2   7   4   13.90    1.90
   2   7  -4   16.10    2.70
  -2   7   4   15.10    1.80
   2   7  -4   11.40    1.70
   1  -7  -4    5.50    1.70
   1   7  -4    5.30    1.40
  -1   7   4    7.50    1.40
  -1   7   4    9.40    1.50
   0  -7   4   59.79    3.90
   0   7  -4   49.80    3.30
   0   7   4   57.59    3.50
   0   7   4   52.99    3.30
   1  -7   4   -0.20    1.50
   1   7   4    0.60    1.10
   1   7   4    0.60    1.50
   1   7   4   -0.30    1.20
  -1   7  -4   -0.20    1.20
   2  -7   4   54.29    3.70
   2   7   4   56.59    3.30
   2   7   4   52.49    3.70
  -2   7  -4   49.99    3.40
   2   7   4   50.79    3.60
   3  -7   4   55.79    4.00
   3   7   4   56.89    3.90
   3   7   4   64.19    4.10
  -3   7  -4   57.19    3.60
   3   7   4   62.89    3.50
   4  -7   4   17.20    2.40
   4   7   4   11.70    2.30
   4   7   4   16.30    2.60
  -4   7  -4   16.20    2.00
   4   7   4   13.10    1.80
   5  -7   4    7.40    1.90
   5   7   4    5.10    1.70
   5   7   4    4.70    1.80
  -5   7  -4    4.00    1.50
   5   7   4    5.40    1.20
   6  -7   4   62.09    4.20
   6   7   4   62.69    4.30
   6   7   4   67.49    4.40
  -6   7  -4   61.69    4.00
   6   7   4   63.49    3.70
   7  -7   4   28.50    3.10
   7   7   4   23.80    2.20
   7   7   4   26.60    3.10
  -7   7  -4   24.10    2.50
   7   7   4   29.40    3.10
   8  -7   4   14.80    2.20
   8   7   4   11.90    2.30
  -8   7  -4   10.10    1.80
   8   7   4   15.60    2.50
   8   7   4    7.80    1.40
   9  -7   4   80.69    5.10
  -9   7  -4   83.69    4.90
   9   7   4   84.39    5.30
   9   7   4   83.79    4.60
  10  -7   4   14.20    3.10
  10   7   4   28.50    3.30
  10   7   4   25.70    2.50
 -10   7  -4   20.60    2.60
  11  -7   4   46.90    3.90
  11   7   4   46.60    3.30
 -11   7  -4   45.40    3.60
  11   7   4   34.00    5.30
  12  -7   4   66.89    4.80
 -12  -7  -4   65.29    5.60
  12   7   4   68.19    5.00
 -12   7  -4   67.49    4.50
 -13  -7  -4    0.70    2.50
  13  -7   4   -0.60    1.90
  13   7   4    2.00    2.10
 -13   7  -4    2.40    1.90
  14  -7   4   57.89    4.60
 -14  -7  -4   54.99    5.30
 -14   7  -4   63.09    4.40
  14   7   4   64.89    5.00
 -15  -7  -4    3.80    2.80
  15  -7   4    4.40    2.20
  15   7   4    1.10    2.50
 -15   7  -4    1.00    2.00
  16  -7   4   45.50    4.30
 -16  -7  -4   42.40    4.90
 -16   7  -4   47.60    4.30
  16   7   4   46.40    4.70
  17  -7   4    2.50    2.50
 -17  -7  -4    1.00    2.70
  17   7   4    6.20    3.00
 -17   7  -4    4.10    2.10
 -18  -7  -4    9.00    3.20
  18  -7   4    5.90    2.80
  18   7   4   11.90    3.20
 -18   7  -4    6.20    2.60
 -19  -7  -4    3.90    3.00
  19  -7   4    3.50    2.50
  19   7   4    6.30    3.00
 -20  -7  -4    5.10    3.10
  20  -7   4   13.80    3.20
  20   7   4    7.50    3.40
  21  -7   4    0.70    2.90
 -21  -7  -4   -0.90    3.00
  21   7   4    1.40    3.40
 -22  -7  -4   -1.90    3.00
  22  -7   4   -0.30    3.10
  22   7   4    0.80    3.40
 -23  -8   4    9.20    3.50
  23  -8  -4   12.40    3.60
  23   8  -4   16.80    4.00
 -22  -8   4   -2.80    3.40
  22   8  -4    4.70    4.80
 -21  -8   4    1.30    3.10
  21  -8  -4   -4.30    2.90
  21   8  -4    4.70    3.50
 -20  -8   4    3.40    3.10
  20  -8  -4    5.50    3.00
  20   8  -4    4.40    3.20
  19  -8  -4    7.80    2.90
 -19  -8   4    6.60    2.90
  19   8  -4    5.10    2.90
 -19   8   4   13.20    2.60
 -18  -8   4    0.60    2.60
  18  -8  -4    1.30    2.50
  18   8  -4   -0.20    2.80
 -18   8   4    3.50    2.30
 -17  -8   4    1.20    2.50
  17  -8  -4    2.60    2.60
  17   8  -4    4.40    2.60
 -17   8   4    8.50    2.20
  16  -8  -4   38.60    4.20
 -16  -8   4   31.70    4.00
 -16   8   4   39.80    3.70
  16   8  -4   37.10    4.40
 -15  -8   4    0.30    2.10
  15  -8  -4    0.70    2.40
 -15   8   4   -0.60    1.90
  15   8  -4   -1.30    2.40
 -14  -8   4    5.00    2.30
  14  -8  -4    7.90    2.50
  14   8  -4    7.80    2.50
 -14   8   4    4.80    1.70
  13  -8  -4    1.90    2.10
 -13  -8   4    1.30    2.00
  13   8  -4    1.00    2.10
 -13   8   4    1.60    1.60
  12  -8  -4    1.50    2.00
 -12  -8   4    1.70    1.80
 -12   8   4    2.00    1.60
  12   8  -4    0.00    2.20
  11  -8  -4   44.80    3.80
 -11  -8   4   37.80    3.60
  11   8  -4   46.20    3.30
  11   8  -4   47.60    4.30
 -10  -8   4    2.00    1.80
  10   8  -4    4.90    1.50
  10   8  -4    2.50    2.10
 -10   8   4    2.50    1.50
   9  -8  -4   79.39    5.20
  -9  -8   4   84.09    5.00
   9   8  -4   85.69    5.60
   9   8  -4   84.09    4.70
  -9   8   4   83.29    4.80
   8  -8  -4   72.49    4.80
  -8  -8   4   63.19    4.20
  -8   8   4   68.99    4.30
   8   8  -4   68.99    4.90
   8   8  -4   75.89    4.20
   7  -8  -4   29.60    3.20
  -7  -8   4   31.80    2.70
  -7   8   4   28.20    2.80
   7   8  -4   35.80    3.70
   7   8  -4   35.50    2.90
  -6  -8   4   13.60    2.10
   6  -8  -4   19.00    2.90
   6   8  -4   18.20    2.70
  -6   8   4   16.90    2.30
   6   8  -4   18.10    2.30
  -5  -8   4  102.69    5.30
   5  -8  -4  105.39    6.00
   5   8  -4  105.29    5.60
   5   8  -4  101.89    6.20
  -5   8   4  104.79    5.60
   4  -8  -4   -1.60    1.60
  -4  -8   4    1.00    0.90
  -4   8   4    0.10    1.20
   4   8  -4    0.10    1.70
   4   8  -4    0.70    1.40
   3  -8  -4   13.60    2.20
   3   8  -4   14.50    2.30
   3   8  -4   14.90    2.10
  -3   8   4   16.60    2.20
   2  -8  -4   23.80    2.90
  -2   8   4   25.60    2.30
   2   8  -4   21.50    2.50
  -1  -8   4  329.27   15.80
   1  -8  -4  335.07   15.80
  -1   8   4  316.97   15.30
  -1   8   4  329.97   15.20
   1   8  -4  324.47   15.40
   0  -8   4   -0.50    1.80
   0  -8  -4    1.40    1.80
   0   8  -4    1.00    1.30
   0   8   4    2.30    1.40
   0   8   4    2.70    1.20
   1  -8   4   19.60    2.60
   1   8   4   22.90    2.20
   1   8   4   21.20    2.30
  -1   8  -4   24.60    2.60
   2  -8   4    4.80    1.90
   2   8   4    3.00    1.50
  -2   8  -4    4.40    1.60
   2   8   4    5.30    1.40
   2   8   4    1.90    1.70
   3  -8   4  219.78   11.20
   3   8   4  229.98   11.30
   3   8   4  222.98   11.30
   3   8   4  229.38   10.90
  -3   8  -4  224.08   11.00
   4  -8   4  168.68    8.60
   4   8   4  168.28    8.60
   4   8   4  162.18    8.20
  -4   8  -4  157.38    8.30
   4   8   4  172.18    8.80
   5  -8   4  494.05   23.40
  -5   8  -4  500.75   23.20
   5   8   4  498.25   23.40
   5   8   4  501.25   23.00
   5   8   4  498.25   23.50
   6  -8   4   36.80    3.40
   6   8   4   35.50    3.70
  -6   8  -4   29.50    2.90
   6   8   4   36.80    2.70
   7  -8   4   14.80    2.40
  -7   8  -4   16.20    2.20
   7   8   4   15.10    2.20
   7   8   4   10.70    2.40
   8  -8   4    0.20    1.70
  -8   8  -4   -0.80    1.80
   8   8   4   -1.40    2.00
   8   8   4    1.50    1.40
   9  -8   4    4.70    2.00
  -9   8  -4    5.20    1.80
   9   8   4    4.60    1.50
 -10  -8  -4    5.60    2.50
  10  -8   4    3.10    1.90
 -10   8  -4    3.40    1.80
  10   8   4    5.40    1.70
  10   8   4    5.70    2.30
  11  -8   4   25.70    3.50
 -11  -8  -4   31.90    5.40
 -11   8  -4   24.50    3.20
  11   8   4   24.20    3.80
  11   8   4   31.50    3.10
  12  -8   4    1.30    1.90
 -12  -8  -4    5.00    2.60
  12   8   4    2.90    2.20
 -12   8  -4    1.60    1.80
 -13  -8  -4   25.40    4.40
  13  -8   4   29.80    3.70
 -13   8  -4   26.10    3.30
  13   8   4   29.30    4.10
  14  -8   4   35.40    4.10
 -14  -8  -4   44.60    5.00
  14   8   4   41.70    4.70
 -14   8  -4   43.60    4.00
 -15  -8  -4   -0.50    2.70
  15  -8   4   -1.30    2.10
  15   8   4   -1.20    2.40
 -15   8  -4   -1.30    2.10
 -16  -8  -4   36.40    4.80
  16  -8   4   42.90    4.40
 -16   8  -4   39.00    4.00
  16   8   4   29.90    4.60
 -17  -8  -4   23.60    4.80
  17  -8   4   26.20    4.10
  17   8   4   33.00    4.80
 -17   8  -4   23.90    4.00
 -18  -8  -4    4.90    3.10
  18  -8   4    6.20    2.90
 -18   8  -4    6.10    2.70
  18   8   4    8.20    3.30
 -19  -8  -4    3.50    3.20
  19  -8   4    2.20    2.80
  19   8   4    3.70    3.50
 -20  -8  -4    1.90    2.90
  20  -8   4    1.00    3.10
  20   8   4    1.50    3.50
 -21  -8  -4   -1.60    3.20
  21  -8   4    2.20    2.90
  21   8   4    2.90    3.60
  22  -9  -4   29.10    4.00
 -22  -9   4   13.70    3.90
  22   9  -4   19.70    4.30
 -21  -9   4   -1.20    3.30
  21  -9  -4   -3.40    5.00
  21   9  -4    6.20    5.00
 -20  -9   4    4.00    3.10
  20  -9  -4    9.60    3.40
  20   9  -4    7.90    3.80
 -20   9   4   11.20    3.00
  19  -9  -4    2.50    2.80
 -19  -9   4   -3.40    2.60
 -19   9   4    1.60    2.40
  19   9  -4   -2.30    3.20
  18  -9  -4    4.60    3.00
 -18  -9   4   -0.60    2.70
 -18   9   4    3.80    2.20
  18   9  -4    8.70    3.40
 -17  -9   4   -2.30    2.80
  17  -9  -4    1.60    2.70
 -17   9   4    3.50    2.10
  17   9  -4   -0.50    2.60
 -16  -9   4   24.30    3.60
  16  -9  -4   27.60    4.00
 -16   9   4   33.40    3.60
  16   9  -4   30.90    4.60
 -15  -9   4   -0.10    2.40
  15  -9  -4    7.80    2.50
 -15   9   4    4.90    2.20
  15   9  -4    8.50    2.80
 -14  -9   4    5.60    2.50
  14  -9  -4   14.20    2.70
 -14   9   4    8.20    2.00
  14   9  -4   13.40    2.70
 -13  -9   4   61.99    5.20
  13  -9  -4   82.79    5.40
  13   9  -4   83.49    5.80
 -13   9   4   84.19    4.90
 -12  -9   4   22.60    3.60
  12  -9  -4   37.90    3.70
  12   9  -4   34.10    4.10
 -12   9   4   35.10    3.10
 -11  -9   4    3.60    2.20
  11  -9  -4    6.30    2.10
  11   9  -4    8.50    2.70
 -11   9   4    8.10    1.80
  11   9  -4    8.40    2.20
  10  -9  -4   17.60    2.70
 -10  -9   4   16.20    2.40
  10   9  -4   20.30    2.80
  10   9  -4   16.40    2.90
 -10   9   4   15.90    2.70
  -9  -9   4   -1.60    1.70
   9  -9  -4    2.70    2.00
   9   9  -4    2.40    2.30
  -9   9   4    3.60    1.60
   9   9  -4    3.40    1.70
  -8  -9   4   25.10    3.00
   8  -9  -4   38.00    3.80
  -8   9   4   34.20    2.90
   8   9  -4   40.30    3.10
   8   9  -4   36.80    4.10
   7  -9  -4   10.50    3.50
  -7   9   4   14.40    2.00
   7   9  -4   10.10    2.60
   7   9  -4   11.40    1.90
   6  -9  -4   60.49    4.50
   6   9  -4   63.39    4.00
   6   9  -4   58.19    4.60
  -6   9   4   56.49    3.90
   5  -9  -4   31.80    3.60
   5   9  -4   41.00    3.30
   4  -9  -4   20.70    3.20
   4   9  -4   21.70    3.20
  -4   9   4   24.50    2.50
   4   9  -4   19.00    2.40
   3  -9  -4  103.49    6.10
   3   9  -4  104.19    5.70
  -3   9   4   94.69    5.40
  -2  -9   4   44.20    4.00
   2  -9  -4   46.70    4.00
   2   9  -4   39.90    3.30
  -2   9   4   44.40    3.20
   1  -9  -4   64.19    4.60
  -1  -9   4   66.69    4.80
   1   9  -4   68.19    4.30
  -1   9   4   66.79    4.10
   0  -9  -4   -1.10    1.90
   0  -9   4   -0.20    1.90
   0   9   4    0.20    1.40
   0   9  -4    0.10    1.50
   1  -9   4   20.40    3.30
  -1  -9  -4   20.60    3.30
   1   9   4   20.70    2.40
  -1   9  -4   16.90    2.70
   2  -9   4   -0.60    1.70
   2   9   4   -0.20    1.40
  -2   9  -4   -0.90    1.40
   3   9   4    5.00    2.20
   3   9   4    5.80    1.60
   4  -9   4   76.09    5.20
  -4   9  -4   75.29    4.60
   4   9   4   78.19    5.30
   4   9   4   78.39    4.50
   5  -9   4    1.20    1.80
   5   9   4    4.30    2.20
  -5   9  -4    1.80    1.60
   5   9   4    6.30    1.60
   6  -9   4  127.09    7.20
   6   9   4  129.79    6.70
  -6   9  -4  122.79    6.90
  -7  -9  -4    4.40    2.20
   7  -9   4    1.80    1.90
  -7   9  -4    2.90    1.70
   7   9   4   -0.70    1.50
   7   9   4   -1.10    2.10
  -8  -9  -4  104.59    6.50
   8  -9   4  100.89    6.20
   8   9   4  105.29    6.60
   8   9   4  103.59    5.80
  -8   9  -4  107.19    6.00
  -9  -9  -4   51.69    4.60
   9  -9   4   41.10    4.00
   9   9   4   47.50    4.50
  -9   9  -4   43.60    3.60
   9   9   4   43.10    3.60
 -10  -9  -4   28.80    4.80
  10  -9   4   20.40    3.40
  10   9   4   16.70    3.00
  10   9   4   17.90    2.90
 -10   9  -4   21.50    3.00
  11  -9   4    0.30    2.10
 -11  -9  -4    1.60    2.60
 -11   9  -4   -0.20    1.80
  11   9   4    0.80    2.40
 -12  -9  -4   84.59    6.50
  12  -9   4   87.19    5.90
  12   9   4   93.59    6.40
 -12   9  -4   90.19    5.60
  13  -9   4   29.60    4.00
 -13  -9  -4   24.30    3.90
  13   9   4   24.70    3.70
 -13   9  -4   27.40    3.50
 -14  -9  -4   22.40    4.30
  14  -9   4   22.20    3.30
 -14   9  -4   19.90    2.80
  14   9   4   15.30    3.40
  15  -9   4    8.20    2.90
 -15  -9  -4    4.50    3.20
 -15   9  -4    4.10    2.10
  15   9   4    4.90    3.30
 -16  -9  -4    7.60    3.40
  16  -9   4    6.50    2.80
 -16   9  -4    1.90    2.30
  16   9   4    6.30    3.10
  17  -9   4   -0.90    2.50
 -17  -9  -4    2.70    3.10
  17   9   4    0.50    3.20
 -17   9  -4   -0.80    2.30
  18  -9   4    2.20    2.80
 -18  -9  -4    0.30    2.90
  18   9   4    1.20    3.30
 -18   9  -4    6.70    2.60
 -19  -9  -4    2.70    3.30
  19  -9   4   12.10    4.70
  19   9   4    6.60    3.90
 -19   9  -4    7.40    5.10
 -20  -9  -4   -3.70    3.20
  20  -9   4   -4.20    2.80
  20   9   4   -4.70    3.70
  20 -10  -4    6.60    3.50
 -20 -10   4   -1.90    4.20
 -20  10   4   12.20    3.20
  20  10  -4    8.50    4.00
  19 -10  -4   -2.30    2.90
 -19 -10   4   -7.90    3.40
 -19  10   4    6.00    2.70
  19  10  -4    0.20    3.40
 -18 -10   4    2.40    3.30
  18 -10  -4    2.60    3.10
 -18  10   4   10.80    2.60
  18  10  -4    7.40    3.60
 -17 -10   4   -3.00    3.10
  17 -10  -4    1.60    2.90
 -17  10   4    1.70    2.30
  17  10  -4    2.70    3.00
  16 -10  -4   11.00    2.90
 -16 -10   4   10.80    3.30
 -16  10   4   14.80    2.70
  16  10  -4   19.20    3.50
 -15 -10   4   -3.30    2.60
  15 -10  -4    3.40    2.60
  15  10  -4    0.40    3.00
 -15  10   4    2.40    2.10
  14 -10  -4    6.50    2.70
 -14 -10   4    5.60    2.80
 -14  10   4   10.60    2.30
  14  10  -4    5.00    2.90
 -13 -10   4   -5.90    2.30
  13 -10  -4    2.90    2.40
 -13  10   4    1.70    2.10
  13  10  -4   -1.20    2.60
  12 -10  -4    6.60    2.50
 -12 -10   4   -2.10    4.00
 -12  10   4    7.30    2.10
  12  10  -4    6.20    2.90
  11 -10  -4   14.90    2.80
  11  10  -4   13.80    3.10
  11  10  -4   16.40    2.60
 -11  10   4   18.40    2.90
  10 -10  -4   31.40    4.00
  10  10  -4   39.00    3.90
  10  10  -4   34.70    4.30
 -10  10   4   36.70    3.30
   9 -10  -4   45.70    4.40
   9  10  -4   56.79    4.20
   9  10  -4   46.10    4.60
  -9  10   4   52.49    3.80
   8 -10  -4    7.40    2.30
  -8  10   4    7.00    1.90
   8  10  -4    9.00    2.10
   8  10  -4    5.50    2.40
   7 -10  -4    2.40    2.10
   7  10  -4    1.90    2.40
  -7  10   4    2.80    1.60
   7  10  -4    1.40    1.70
   6 -10  -4    9.90    2.40
   6  10  -4    7.40    2.40
   6  10  -4   11.70    3.20
  -6  10   4   12.80    2.00
   5 -10  -4   27.10    3.80
   5  10  -4   34.10    4.20
  -5  10   4   37.90    3.10
   4 -10  -4  134.59    7.70
  -4  10   4  136.09    7.00
   4  10  -4  131.69    7.20
  -3 -10   4   97.29    6.10
   3 -10  -4   85.79    5.90
  -3  10   4   90.49    5.20
   3  10  -4   91.59    5.30
  -2 -10   4   63.19    4.90
   2 -10  -4   66.29    5.00
   2  10  -4   61.59    4.10
  -2  10   4   62.19    4.00
   1 -10  -4   34.30    4.00
  -1 -10   4   33.50    3.90
   1  10  -4   33.40    3.00
  -1  10   4   34.00    2.90
   0 -10  -4  114.09    6.60
   0 -10   4   98.39    6.40
   0  10  -4  101.79    5.90
   1 -10   4   98.89    6.10
  -1 -10  -4   94.09    6.20
   1  10   4   92.59    5.40
  -1  10  -4   97.99    5.60
   2 -10   4   16.70    2.70
  -2 -10  -4   14.40    2.90
  -2  10  -4   17.80    2.40
   2  10   4   15.80    2.60
   3 -10   4    7.40    2.10
   3  10   4   12.10    2.00
  -3  10  -4    8.90    1.90
   4 -10   4   13.00    2.50
   4  10   4   12.20    2.00
   4  10   4   13.60    2.60
  -4  10  -4   11.90    2.10
   5 -10   4   45.10    4.20
  -5  10  -4   44.90    3.70
   5  10   4   47.40    4.50
   5  10   4   43.90    3.50
   6 -10   4    5.00    2.00
   6  10   4    2.90    2.30
   6  10   4    6.30    2.40
  -6  10  -4    7.00    2.00
   7 -10   4   28.00    3.70
  -7  10  -4   30.10    3.00
   7  10   4   28.20    4.10
   8 -10   4   40.30    4.10
  -8 -10  -4   32.90    4.60
   8  10   4   44.00    4.70
  -8  10  -4   44.10    3.70
   9 -10   4    5.70    2.40
  -9 -10  -4    3.00    2.80
   9  10   4    1.60    2.70
  -9  10  -4    4.70    2.00
   9  10   4    4.10    2.10
 -10 -10  -4    7.10    2.80
  10 -10   4    4.70    2.40
  10  10   4    6.00    2.20
 -10  10  -4    5.60    2.00
  10  10   4    1.30    2.80
 -11 -10  -4    4.20    2.70
  11 -10   4    1.20    2.20
  11  10   4    1.20    2.60
 -11  10  -4    1.50    2.00
 -12 -10  -4   14.50    3.40
  12 -10   4   14.30    2.80
 -12  10  -4   12.50    2.50
  12  10   4   15.50    3.20
 -13 -10  -4    2.20    3.00
  13 -10   4    3.10    2.50
 -13  10  -4    3.40    2.20
  13  10   4    1.50    3.10
 -14 -10  -4    2.50    3.00
  14 -10   4    7.20    2.80
  14  10   4    8.60    3.40
 -14  10  -4    4.20    2.20
  15 -10   4    0.30    2.80
 -15 -10  -4    1.70    3.20
  15  10   4   -0.40    3.30
 -15  10  -4    0.70    2.40
 -16 -10  -4    1.50    3.10
  16 -10   4    1.40    2.70
 -16  10  -4    1.50    2.30
  16  10   4   -2.40    3.20
 -17 -10  -4   27.00    4.90
  17 -10   4   32.90    4.80
  17  10   4   33.50    5.30
 -17  10  -4   35.50    4.60
 -18 -10  -4    9.30    3.70
  18 -10   4   11.20    3.20
 -18  10  -4    3.40    2.80
  18  10   4    7.30    5.80
  19 -11  -4   24.90    4.00
 -19  11   4   25.50    5.10
  19  11  -4   26.10    4.50
  18 -11  -4   -0.90    3.30
 -18  11   4    1.50    2.50
  18  11  -4   -3.60    3.00
 -17 -11   4    5.00    3.60
  17 -11  -4   14.10    3.20
  17  11  -4   17.40    3.90
 -17  11   4   25.70    4.00
 -16 -11   4   -7.10    3.10
  16 -11  -4   -1.20    2.90
 -16  11   4    1.10    2.20
  16  11  -4    1.70    3.50
 -15 -11   4   -9.30    3.80
  15 -11  -4    0.30    2.90
  15  11  -4   -4.30    3.30
 -15  11   4    1.90    2.10
  14 -11  -4   -1.80    2.40
 -14  11   4   -0.90    1.90
  14  11  -4   -2.60    3.30
  13 -11  -4    6.90    2.60
 -13  11   4    8.00    2.20
  13  11  -4    6.80    3.20
  12 -11  -4    2.10    2.40
  12  11  -4    3.50    3.00
 -12  11   4   -0.60    2.00
  11 -11  -4  150.08    8.70
  11  11  -4  171.98    8.80
  11  11  -4  145.39    9.20
 -11  11   4  158.38    8.40
  10 -11  -4    2.70    2.40
 -10  11   4    8.00    2.00
  10  11  -4    2.10    2.90
  10  11  -4    1.50    2.50
   9 -11  -4   29.20    4.00
  -9  11   4   31.20    3.40
   9  11  -4   29.60    4.50
   9  11  -4   34.50    3.80
   8 -11  -4    9.30    2.60
  -8  11   4   13.80    2.20
   8  11  -4   11.70    3.20
   8  11  -4   11.40    2.40
   7 -11  -4    1.10    2.20
  -7  11   4    3.50    1.70
   7  11  -4    4.30    2.00
   7  11  -4   -1.00    2.60
   6 -11  -4   -0.30    2.10
  -6  11   4   -0.40    1.60
   6  11  -4    1.50    1.80
   6  11  -4    3.40    2.50
   5 -11  -4   -2.00    2.00
   5  11  -4    1.70    1.80
  -5  11   4    3.20    1.70
   4 -11  -4    5.10    2.30
  -4 -11   4    1.90    2.20
  -4  11   4    4.90    1.80
   4  11  -4    4.60    2.00
  -3 -11   4   -2.70    2.30
   3 -11  -4    0.90    2.30
  -3  11   4    0.50    1.70
   3  11  -4    1.00    1.80
   2 -11  -4    2.90    2.40
  -2 -11   4    1.10    2.40
   2  11  -4    3.60    1.90
  -2  11   4    4.00    1.70
  -1 -11   4    0.80    2.20
   1 -11  -4    1.00    2.60
   1  11  -4    2.00    1.80
  -1  11   4    1.70    1.60
   0 -11   4    6.40    2.30
   0 -11  -4    5.30    2.60
   0  11   4    9.00    1.90
   0  11  -4    7.60    2.00
  -1 -11  -4   94.49    6.30
   1 -11   4   86.49    6.00
   1  11   4   90.89    5.40
  -1  11  -4   95.49    5.60
   2 -11   4   22.10    3.70
  -2 -11  -4   15.70    2.90
   2  11   4   28.50    3.00
  -2  11  -4   21.90    2.90
  -3 -11  -4    2.50    2.60
   3 -11   4    8.40    2.50
   3  11   4    9.20    2.10
  -3  11  -4    9.00    2.10
   4 -11   4   40.20    4.30
  -4  11  -4   37.30    3.70
   4  11   4   42.90    3.60
   5 -11   4   36.40    4.20
  -5  11  -4   38.00    3.70
   5  11   4   41.20    3.70
   6 -11   4   19.60    2.90
   6  11   4   17.80    2.50
   6  11   4    9.10    3.00
  -6  11  -4   11.10    2.20
   7 -11   4   80.59    5.80
   7  11   4   86.79    6.40
  -7  11  -4   79.79    5.30
   7  11   4   85.29    5.40
   8 -11   4    6.80    2.40
   8  11   4    5.90    2.80
   8  11   4    4.00    2.10
  -8  11  -4    4.90    2.10
   9 -11   4   28.30    4.10
   9  11   4   35.00    4.80
   9  11   4   26.30    4.00
  -9  11  -4   31.80    3.60
  10 -11   4   17.80    3.00
  10  11   4   12.50    3.50
  10  11   4   20.70    3.10
 -10  11  -4   11.20    2.40
 -11 -11  -4   39.00    5.30
  11 -11   4   39.60    4.40
 -11  11  -4   35.30    3.80
  11  11   4   37.70    5.40
 -12 -11  -4    2.10    3.10
  12 -11   4    0.50    2.70
  12  11   4   -0.90    3.20
 -12  11  -4   -2.80    1.90
  13 -11   4   24.70    3.40
 -13 -11  -4   13.90    3.50
  13  11   4   29.70    4.40
 -13  11  -4   24.80    3.90
 -14 -11  -4   -4.90    3.00
  14 -11   4    0.60    2.70
  14  11   4    1.10    3.80
 -14  11  -4    0.90    2.30
 -15 -11  -4   11.50    3.80
  15 -11   4   18.00    3.20
  15  11   4   29.70    4.60
 -15  11  -4   16.40    2.90
 -16 -11  -4   -2.10    3.50
  16 -11   4    5.30    3.10
 -16  11  -4   12.60    2.80
  16  11   4    2.40    4.70
  17 -11   4   41.00    5.00
  17  11   4   34.60    5.90
  17 -12  -4   12.70    3.30
  17  12  -4    9.80    3.90
 -17  12   4    9.60    2.60
  16 -12  -4    1.40    3.00
 -16  12   4    5.80    4.30
  16  12  -4   -1.90    3.30
  15 -12  -4   13.40    3.80
 -15  12   4   16.10    3.10
  15  12  -4   12.40    4.20
  14 -12  -4    1.10    2.70
  14  12  -4   -1.40    3.10
 -14  12   4    5.40    2.40
  13 -12  -4    8.80    2.80
  13  12  -4   13.60    3.80
 -13  12   4   13.20    2.70
  12 -12  -4   12.20    3.10
 -12  12   4    9.60    2.30
  12  12  -4    7.70    3.50
  11 -12  -4   11.50    3.10
  11  12  -4    6.60    3.20
 -11  12   4   11.80    2.50
  10 -12  -4    2.20    2.60
 -10  12   4    2.90    2.00
  10  12  -4   10.90    2.90
  10  12  -4    1.60    3.30
   9 -12  -4    9.90    2.60
  -9  12   4   14.50    2.50
   9  12  -4   13.10    3.50
   9  12  -4    5.90    2.90
   8 -12  -4    0.60    2.50
  -8  12   4    3.40    2.00
   8  12  -4   -2.50    2.30
   8  12  -4   -0.40    3.00
   7 -12  -4    5.10    2.70
  -7  12   4    7.80    2.10
   7  12  -4    6.30    2.50
   6 -12  -4   25.60    4.10
   6  12  -4   27.90    3.90
  -6  12   4   31.80    3.50
  -5 -12   4   36.90    4.60
   5 -12  -4   37.80    4.70
   5  12  -4   51.19    4.10
  -5  12   4   44.40    3.90
  -4 -12   4   40.60    4.70
   4 -12  -4   34.70    4.50
  -4  12   4   40.40    3.60
   4  12  -4   40.50    3.80
   3 -12  -4    9.50    2.80
  -3 -12   4    9.10    2.90
  -3  12   4   18.70    3.00
   3  12  -4   12.60    2.40
   2 -12  -4   16.10    3.00
  -2 -12   4   28.60    4.20
   2  12  -4   24.60    3.40
  -2  12   4   26.60    3.10
  -1 -12   4    3.60    2.40
   1 -12  -4    4.90    2.60
  -1  12   4    7.60    2.10
   1  12  -4    7.40    2.10
   0 -12  -4  133.59    8.10
   0 -12   4  134.09    8.00
   0  12   4  144.39    7.40
   0  12  -4  123.69    7.30
  -1 -12  -4    1.50    2.60
   1 -12   4   -2.90    2.30
  -1  12  -4    0.30    1.90
   1  12   4    3.40    2.00
  -2 -12  -4   16.20    3.30
   2 -12   4   13.30    2.70
  -2  12  -4   19.50    3.00
   2  12   4   18.60    3.00
  -3 -12  -4    8.40    3.00
   3 -12   4    5.60    2.40
   3  12   4   10.30    2.30
  -3  12  -4    8.60    2.10
   4 -12   4    7.90    2.60
  -4 -12  -4   14.60    3.20
  -4  12  -4   10.80    2.20
   4  12   4   10.80    2.20
  -5 -12  -4    2.90    2.70
   5 -12   4    3.50    2.40
   5  12   4    4.80    2.10
  -5  12  -4    3.20    1.90
   6 -12   4    9.50    2.80
   6  12   4    2.30    2.20
  -6  12  -4    2.90    1.90
   7 -12   4   52.99    5.00
   7  12   4   55.39    4.60
  -7  12  -4   53.69    4.30
   8 -12   4   11.70    2.80
  -8  12  -4    9.60    2.30
   8  12   4   11.10    2.90
   8  12   4   15.00    3.60
   9 -12   4    7.90    2.60
   9  12   4   12.40    2.90
   9  12   4   16.10    3.60
  -9  12  -4   13.50    2.60
  10 -12   4    1.40    2.40
  10  12   4    2.40    3.30
 -10  12  -4    4.00    2.30
  11 -12   4   -1.60    2.30
 -11  12  -4    1.30    2.20
  11  12   4    3.50    3.50
  12 -12   4    3.30    2.90
 -12  12  -4    4.70    2.40
  12  12   4    0.50    3.60
  13 -12   4    4.60    4.80
  13  12   4    4.80    3.70
 -13  12  -4    1.10    2.30
  14 -12   4    8.10    3.00
  15 -12   4    0.60    2.90
  15  12   4   -2.80    3.90
 -15  12  -4   -1.40    2.50
  14 -13  -4   12.80    3.30
  14  13  -4   17.30    4.20
 -14  13   4   23.00    3.30
  13 -13  -4   10.20    3.30
  13  13  -4    6.70    4.00
 -13  13   4    6.70    3.00
  12 -13  -4   -0.20    2.90
  12  13  -4    3.10    4.10
 -12  13   4    3.00    2.40
  11 -13  -4    0.90    2.70
 -11  13   4    1.00    2.30
  11  13  -4    4.30    3.60
  10 -13  -4   58.89    5.50
 -10  13   4   61.49    4.90
  10  13  -4   73.99    5.90
   9 -13  -4    2.00    2.60
  -9  13   4    4.10    2.30
   9  13  -4    6.10    2.90
   8 -13  -4   37.50    4.80
  -8  13   4   44.00    4.20
   8  13  -4   39.00    5.10
   7 -13  -4    2.80    2.80
  -7 -13   4    1.60    2.80
  -7  13   4    7.70    2.30
   7  13  -4    2.30    2.80
   6 -13  -4   10.10    2.80
  -6 -13   4    7.60    3.00
   6  13  -4   12.40    2.70
  -6  13   4   18.00    2.60
   5 -13  -4   12.80    3.10
  -5 -13   4   17.70    3.50
   5  13  -4   28.30    3.90
  -5  13   4   25.30    3.50
   4 -13  -4    1.80    2.80
  -4 -13   4    2.40    2.90
   4  13  -4    2.20    2.20
  -4  13   4    4.00    2.00
   3 -13  -4    1.20    2.60
  -3 -13   4    2.90    2.80
  -3  13   4    4.20    2.20
   3  13  -4    3.80    2.20
  -2 -13   4    4.90    2.80
   2 -13  -4    5.00    2.80
  -2  13   4    5.50    2.00
   2  13  -4    4.20    2.20
   1 -13  -4    0.90    2.80
  -1 -13   4    6.10    2.80
   1  13  -4    3.10    2.00
  -1  13   4    4.50    2.20
   0 -13   4    9.50    2.70
   0 -13  -4    6.90    3.00
   0  13  -4    9.20    2.40
   0  13   4   16.40    2.60
  -1 -13  -4    5.40    3.30
   1 -13   4    2.60    2.70
   1  13   4    4.30    2.30
  -1  13  -4    6.50    2.10
   2 -13   4   10.50    2.80
  -2 -13  -4   11.50    3.30
  -2  13  -4   12.10    2.50
   2  13   4    6.70    2.20
   3 -13   4    3.50    2.60
  -3 -13  -4    1.00    2.80
   3  13   4    7.00    2.50
  -3  13  -4    3.10    2.10
  -4 -13  -4   10.30    3.10
   4 -13   4   21.70    3.50
  -4  13  -4   13.60    2.40
   4  13   4    9.20    2.40
  -5 -13  -4    4.40    3.00
   5 -13   4   -0.60    2.40
   5  13   4   -0.90    2.30
  -5  13  -4    1.10    2.00
   6 -13   4   10.60    2.80
  -6 -13  -4    7.10    3.00
  -6  13  -4   15.10    2.60
   6  13   4   19.10    3.10
   7 -13   4    3.40    3.00
  -7  13  -4    0.70    2.30
   7  13   4    5.00    2.60
   8 -13   4   34.80    4.50
   8  13   4   34.20    4.80
  -8  13  -4   37.70    3.90
   9 -13   4    2.30    2.50
   9  13   4    9.30    3.30
  -9  13  -4    8.70    2.60
 -10  13  -4   12.20    3.40
  10  13   4   23.90    4.30
  11 -13   4   20.00    3.40
 -11  13  -4   18.40    3.00
  12 -13   4   13.50    2.90
 -12  13  -4   26.30    4.00
  12  13   4   12.60    3.90
  10 -14  -4   -1.70    2.90
 -10  14   4    1.90    2.40
   9 -14  -4    4.00    2.90
  -9 -14   4    3.10    3.30
   9  14  -4    5.80    3.20
  -9  14   4    2.30    2.40
  -8 -14   4    3.20    3.50
  -8  14   4    4.10    2.80
   8  14  -4    4.30    3.00
  -7 -14   4    0.20    4.30
   7 -14  -4    0.60    2.90
   7  14  -4    2.50    2.70
  -7  14   4    4.20    3.50
  -6 -14   4   -0.50    2.90
   6 -14  -4   10.50    3.30
  -6  14   4    2.90    2.40
   6  14  -4   -1.40    2.80
  -5 -14   4   28.70    4.00
   5 -14  -4   30.00    4.80
   5  14  -4   33.80    4.70
  -5  14   4   33.50    3.80
   4 -14  -4   18.40    3.90
  -4 -14   4    8.70    3.30
   4  14  -4   24.00    3.30
  -4  14   4   14.30    2.70
  -3 -14   4   50.79    5.60
   3 -14  -4   47.40    5.40
  -3  14   4   57.69    4.70
   3  14  -4   52.49    4.80
  -2 -14   4    1.60    2.70
   2 -14  -4    3.50    3.00
  -2  14   4    1.80    2.20
   2  14  -4    4.50    2.50
  -1 -14   4   29.40    4.10
   1 -14  -4   33.40    4.80
  -1  14   4   29.80    3.90
   1  14  -4   33.80    4.20
   0 -14  -4    0.90    3.00
   0 -14   4    0.40    2.80
   0  14  -4   -2.30    2.30
   0  14   4    2.80    2.30
  -1 -14  -4    7.50    3.20
   1 -14   4    4.10    2.70
  -1  14  -4    4.60    2.40
   1  14   4    5.50    2.50
   2 -14   4   -2.00    2.80
  -2 -14  -4   -3.40    3.10
  -2  14  -4    0.50    2.20
   2  14   4    2.90    2.30
  -3 -14  -4   15.80    3.90
   3  14   4   21.00    3.20
  -3  14  -4   26.90    3.30
   4 -14   4    3.60    2.90
  -4 -14  -4    5.30    3.40
   4  14   4    1.90    2.50
  -4  14  -4    3.80    2.50
  -5 -14  -4   14.50    3.70
   5 -14   4    3.80    3.60
   5  14   4   16.90    3.10
  -6 -14  -4   -1.90    3.40
   6 -14   4    2.70    3.00
   6  14   4    5.00    2.80
  -6  14  -4    2.60    2.50
   7 -14   4    0.30    2.40
  -7 -14  -4   -2.20    5.00
   7  14   4   -2.10    3.00
  -7  14  -4    0.70    2.30
   8 -14   4    0.40    2.80
  -8 -14  -4    0.80    3.20
  -8  14  -4    1.50    2.20
   8  14   4   10.10    3.30
  -4  15   4    6.60    2.60
   4  15  -4    4.30    3.00
  -3 -15   4    0.50    2.70
   3 -15  -4   -0.90    3.40
  -3  15   4    4.30    2.40
   3  15  -4   -0.40    3.20
  -2 -15   4    5.30    2.90
   2 -15  -4    0.90    3.10
  -2  15   4    3.60    2.50
   2  15  -4    3.10    2.90
  -1 -15   4    1.70    2.70
   1 -15  -4    3.60    3.00
  -1  15   4    4.60    2.70
   1  15  -4    3.30    2.70
   0 -15  -4    3.90    3.10
   0 -15   4    5.40    3.10
   0  15   4   12.50    2.90
   0  15  -4    4.50    2.50
  -1 -15  -4    0.40    3.00
   1 -15   4    0.30    3.10
   1  15   4    4.60    2.60
  -1  15  -4    6.80    2.60
   2  15   4   28.40    4.40
 -27   0   5    1.50    3.10
  27   0  -5    1.20    2.80
  26   0  -5    1.10    2.80
 -26   0   5    0.40    2.40
  25   0  -5    2.20    2.50
 -25   0   5    4.60    2.80
  24   0  -5    1.10    2.20
 -24   0   5   -0.40    2.40
 -23   0   5    0.90    2.20
  23   0  -5    2.70    2.20
  22   0  -5    0.40    1.90
 -22   0   5   -0.50    2.10
 -21   0   5   63.79    4.70
  21   0  -5   66.59    4.70
 -20   0   5    2.60    2.00
  20   0  -5   -1.50    1.80
  19   0  -5  178.38    9.10
 -19   0   5  181.38    9.20
  18   0  -5    1.10    1.70
 -18   0   5    0.90    1.70
  17   0  -5  192.58   10.20
 -17   0   5  217.58   10.20
 -16   0   5    0.90    1.50
  16   0  -5   -0.60    1.50
  15   0  -5    0.90    1.40
 -15   0   5    3.10    1.40
 -14   0   5    0.70    1.20
  14   0  -5   -0.40    1.20
  13   0  -5  153.68    7.80
 -13   0   5  162.58    7.80
  12   0  -5    0.30    1.00
 -12   0   5    0.90    1.00
 -11   0   5  603.54   27.00
  11   0  -5  579.44   27.10
  11   0  -5  591.54   26.70
  10   0  -5    1.30    1.00
 -10   0   5    1.70    0.90
  -9   0   5    3.30    0.90
   9   0  -5    2.70    1.00
   8   0  -5   -0.40    0.80
  -8   0   5    2.10    0.80
   7   0  -5   42.20    2.40
  -7   0   5   41.60    2.40
  -6   0   5    0.00    0.60
   6   0  -5   -0.20    0.60
  -5   0   5    0.40    0.70
   5   0  -5    1.00    0.60
   4   0  -5   -0.70    0.60
   4   0  -5    0.50    0.50
   3   0  -5    5.90    0.70
   3   0  -5    4.40    0.80
   2   0  -5    0.50    0.60
  -2   0   5    0.80    0.90
   2   0  -5    1.60    0.30
   1   0  -5   12.30    0.70
   1   0  -5   13.60    1.10
  -1   0   5   12.10    1.60
   0   0  -5   -1.40    0.60
   0   0   5   -1.10    0.90
   0   0   5    0.80    0.30
   1   0   5   21.30    1.20
   1   0   5   17.50    2.10
  -1   0  -5   23.20    1.50
   2   0   5    0.10    1.00
   2   0   5    2.80    0.50
  -2   0  -5    1.30    0.60
  -3   0  -5 3019.70  129.49
  -3   0  -5 2644.14  137.29
  -3   0  -5 3029.20  129.59
  -3   0  -5 2508.45  135.79
   3   0   5 2915.51  138.99
  -4   0  -5    1.20    0.60
   4   0   5    0.60    1.00
   4   0   5    0.60    0.60
   5   0   5  221.28   10.00
  -5   0  -5  217.18    9.90
   5   0   5  206.18   10.80
   6   0   5   -0.30    0.80
  -6   0  -5    0.80    0.70
   6   0   5   -0.70    1.20
   7   0   5  671.53   30.60
  -7   0  -5  672.33   30.40
   7   0   5  675.03   31.10
   8   0   5   -0.60    1.30
  -8   0  -5    0.40    0.80
   9   0   5   35.00    3.10
   9   0   5   36.00    2.50
  -9   0  -5   36.20    2.20
 -10   0  -5    0.90    0.80
  10   0   5   -0.90    1.30
  10   0   5   -1.20    1.10
  11   0   5   72.79    4.80
  11   0   5   74.19    4.20
 -11   0  -5   72.69    3.80
  12   0   5    3.20    1.40
 -12   0  -5    0.60    0.90
  13   0   5   37.50    3.00
 -13   0  -5   36.30    2.40
  14   0   5   -0.90    1.50
 -15   0  -5   -2.20    2.10
  15   0   5    0.50    1.50
 -16   0  -5   -4.60    2.00
  16   0   5    1.00    1.80
 -17   0  -5   -0.70    2.20
  17   0   5    3.70    1.80
  18   0   5   -1.40    1.80
 -18   0  -5   -1.10    2.20
  19   0   5   20.80    3.10
 -19   0  -5   13.40    2.80
 -20   0  -5   -0.70    2.30
  20   0   5    3.80    2.20
 -21   0  -5    2.80    2.60
  21   0   5    5.10    2.40
 -22   0  -5   -2.80    2.40
  22   0   5   -0.10    2.20
  23   0   5    3.60    2.60
 -23   0  -5    0.40    2.60
 -24   0  -5    0.50    2.70
  24   0   5   -0.30    2.50
 -25   0  -5   -1.10    2.80
  25   0   5    2.10    2.90
  27  -1  -5    2.90    2.90
 -27  -1   5   -2.80    2.30
  27   1  -5   -0.10    2.70
 -26  -1   5   11.80    3.20
  26  -1  -5   15.70    2.90
  26   1  -5   19.40    3.20
 -26   1   5   14.60    3.00
  25  -1  -5    7.20    2.60
 -25  -1   5    7.70    2.80
  25   1  -5    4.30    2.80
 -25   1   5    6.70    2.60
 -24  -1   5    8.00    2.60
  24  -1  -5   10.10    2.60
 -24   1   5    4.80    2.40
  24   1  -5    7.80    2.50
 -23  -1   5    1.00    2.20
  23  -1  -5    0.90    2.10
  23   1  -5    0.90    2.20
 -23   1   5    0.50    2.30
  22  -1  -5   29.30    3.60
 -22  -1   5   26.10    4.00
  22   1  -5   28.90    3.60
 -22   1   5   26.10    3.80
  21  -1  -5    7.90    2.10
 -21  -1   5   10.10    2.40
  21   1  -5    9.70    2.30
 -21   1   5    6.40    2.20
  20  -1  -5   10.90    2.20
 -20  -1   5    8.40    2.20
  20   1  -5   12.30    2.20
 -20   1   5    3.80    2.00
  19  -1  -5   11.00    2.10
 -19  -1   5   16.40    3.10
 -19   1   5   17.30    2.90
  19   1  -5   12.30    2.20
  18  -1  -5    6.10    1.80
 -18  -1   5    5.40    1.80
  18   1  -5   10.00    2.00
 -17  -1   5    3.90    1.70
  17  -1  -5    2.40    1.80
  17   1  -5    1.90    1.60
 -17   1   5    4.70    1.60
  16  -1  -5   21.70    2.50
 -16  -1   5   23.20    2.80
  16   1  -5   15.40    2.40
 -16   1   5   21.40    2.60
 -15  -1   5   21.40    2.60
  15  -1  -5   15.30    2.50
 -15   1   5   19.10    2.40
  15   1  -5   17.70    2.50
 -14  -1   5  164.08    7.70
  14  -1  -5  145.29    7.60
 -14   1   5  149.99    7.50
  14   1  -5  145.89    7.60
 -14   1   5  145.69    7.00
  13  -1  -5   61.99    3.90
 -13  -1   5   67.49    3.90
  13   1  -5   65.59    3.90
 -13   1   5   65.59    3.80
 -13   1   5   60.09    3.20
  12  -1  -5    9.10    1.60
 -12  -1   5   11.00    1.90
 -12   1   5    7.80    0.90
  12   1  -5    6.00    1.30
 -12   1   5   11.40    1.80
 -11  -1   5    4.20    1.10
  11  -1  -5    3.20    1.20
  11   1  -5    2.40    1.00
 -11   1   5    3.60    1.00
 -11   1   5    3.20    0.60
 -10  -1   5  194.98    9.10
  10  -1  -5  191.58    9.20
 -10   1   5  194.78    8.80
  10   1  -5  184.18    9.10
   9  -1  -5   45.60    2.80
  -9  -1   5   51.29    2.90
   9   1  -5   49.90    2.80
  -9   1   5   49.50    2.80
  -9   1   5   46.40    2.40
   9   1  -5   43.90    2.30
  -8  -1   5   40.00    2.50
   8  -1  -5   41.00    2.50
  -8   1   5   42.80    2.40
   8   1  -5   40.60    2.50
   8   1  -5   38.60    2.00
  -8   1   5   36.90    2.10
   7  -1  -5   80.19    4.10
  -7   1   5   86.09    4.10
   7   1  -5   81.69    3.90
   7   1  -5   82.39    4.20
  -7   1   5   81.29    3.90
   6  -1  -5   96.59    4.80
  -6  -1   5   99.39    4.80
  -6   1   5  100.19    4.60
  -6   1   5  100.09    4.70
   6   1  -5   95.19    4.80
   6   1  -5   96.49    4.60
  -5  -1   5    0.50    0.70
   5  -1  -5    0.40    0.60
   5   1  -5    0.50    0.50
  -5   1   5    0.10    0.50
   5   1  -5   -0.50    0.60
  -5   1   5   -0.50    0.60
   4  -1  -5    3.90    0.60
  -4  -1   5    2.70    0.70
  -4   1   5    0.70    0.80
   4   1  -5    0.80    0.60
  -4   1   5    0.70    0.50
   4   1  -5    2.40    0.60
   3  -1  -5   49.70    2.40
  -3  -1   5   48.30    2.60
   3   1  -5   48.70    2.50
   3   1  -5   45.60    2.50
  -3   1   5   50.49    2.70
  -3   1   5   46.40    2.40
  -2  -1   5  121.09    5.80
   2  -1  -5  119.89    5.50
   2   1  -5  119.79    5.60
  -2   1   5  118.59    5.90
  -2   1   5  120.49    5.70
   2   1  -5  122.09    5.60
   1  -1  -5   26.40    1.20
  -1  -1   5   20.90    1.80
   1   1  -5   22.30    1.50
  -1   1   5   22.70    1.50
  -1   1   5   20.10    1.90
   1   1  -5   22.90    1.50
   0  -1   5  915.21   40.50
   0   1  -5  879.61   40.30
   0   1   5  921.61   40.60
   0   1   5  858.81   40.20
   1  -1   5  497.85   21.60
   1  -1   5  455.45   21.30
   1   1   5  465.45   21.40
   1   1   5  456.55   21.30
   1   1   5  486.15   21.80
  -1   1  -5  466.85   21.40
   2  -1   5 2662.53  135.09
  -2  -1  -5 2548.65  128.19
  -2  -1  -5 2930.41  124.59
  -2  -1  -5 2702.03  129.29
   2  -1   5 2815.12  123.99
   2  -1   5 2463.75  133.29
   2   1   5 2717.83  128.69
  -2   1  -5 2952.50  124.09
   2   1   5 2904.11  124.59
  -2   1  -5 2547.25  134.09
  -2   1  -5 2567.54  134.09
  -3  -1  -5   12.00    1.10
   3  -1   5   15.30    1.80
   3  -1   5   15.20    1.20
   3   1   5   12.00    1.00
   3   1   5   12.10    1.90
  -3   1  -5   17.80    1.30
   4  -1   5  253.17   11.60
   4  -1   5  250.57   12.00
  -4  -1  -5  256.87   11.50
  -4   1  -5  243.98   11.60
   4   1   5  243.18   12.10
   4   1   5  261.17   11.60
   5  -1   5   26.80    2.40
   5  -1   5   27.10    1.90
  -5  -1  -5   28.30    1.70
  -5   1  -5   28.10    1.80
   5   1   5   28.40    1.80
   5   1   5   30.40    2.60
  -6  -1  -5   32.70    2.00
   6  -1   5   34.50    2.70
   6  -1   5   32.60    2.20
   6   1   5   33.50    2.90
  -6   1  -5   34.70    2.10
  -7  -1  -5  103.09    4.90
   7  -1   5  107.29    5.20
   7  -1   5  100.79    5.60
   7   1   5  102.49    5.10
  -7   1  -5  102.49    5.00
   7   1   5   96.59    5.70
   8  -1   5    0.30    1.30
  -8  -1  -5    1.00    0.70
   8  -1   5    3.50    1.00
   8   1   5    1.10    1.40
  -8   1  -5    1.40    0.90
   9  -1   5    1.10    1.30
  -9  -1  -5   -0.50    0.70
   9  -1   5    0.90    1.00
   9   1   5    0.20    1.00
   9   1   5    1.30    1.40
  -9   1  -5   -1.00    0.80
  10  -1   5    4.50    1.30
  10  -1   5    3.20    1.50
 -10  -1  -5    4.70    0.90
  10   1   5    3.40    1.10
[truncated: 3,628,634 more chars]
